# Supplementary material for: A Network Pharmacology Approach to Investigate the Active Compounds and Mechanisms of Musk for Ischemic Stroke
Source: Evid Based Complement Alternat Med. 2020 Jul 3;2020:4063180. doi: 10.1155/2020/4063180 (PMC7354650; doi:10.1155/2020/4063180)
Supplement: Supplementary Materials — The detailed information of chemical composition and predicted target of musk (S1), ischemic stroke target (S2), string data (S3), compound target analysis data (S4), Gene Ontology enrichment analysis results (S5, S6, and S7), and KEGG enrichment analysis results (S8 and S9) used to support the findings of this study is included within the supplementary information files. [file 4063180.f1.zip]

Archive with 9 entries (9 files):
- 4063180.f1/S1.xls
- 4063180.f1/S2.xls
- 4063180.f1/S3.Target String.xls
- 4063180.f1/S4.Core PPI Network Analysis.xls
- 4063180.f1/S5.DAVID Core Gene GO BP.xls
- 4063180.f1/S6.DAVID Core Gene GO CC.xls
- 4063180.f1/S7.DAVID Core Gene GO MF.xls
- 4063180.f1/S8.DAVID-KEGG.xls
- 4063180.f1/S9.MCDOE-KEGG.xls
