# Supplementary material for: A Network Pharmacology Approach to Investigate the Active Compounds and Mechanisms of Musk for Ischemic Stroke
Source: Evid Based Complement Alternat Med. 2020 Jul 3;2020:4063180. doi: 10.1155/2020/4063180 (PMC7354650; doi:10.1155/2020/4063180)
Supplement: Supplementary Materials — The detailed information of chemical composition and predicted target of musk (S1), ischemic stroke target (S2), string data (S3), compound target analysis data (S4), Gene Ontology enrichment analysis results (S5, S6, and S7), and KEGG enrichment analysis results (S8 and S9) used to support the findings of this study is included within the supplementary information files. [file 4063180.f1.zip › 4063180.f1/S1.xls]

## Sheet: Sheet1
Compound	Predicted targets
Androst-4-Ene-3,17-Dione	CYP17A1
	ESR1
	PGR
	OPRK1
	NR3C2
	AR
	PDE7B
	PDE5A
	PDE9A
	PDE4A
	RYR1
	PDE3A
	ADORA2A
	ITPR1
	PDE6A
	PRKDC
	PIK3CD
	PDE3B
	PGD
	PIK3CA
	ADORA2B
	PDE1A
	PDE4D
	PIK3CB
	ITPR2
	PDE1B
	PDE7A
	ITPR3
	POLA2
	PDE4C
	PDE10A
	PDE1C
	ATM
	PDE6B
	PDE4B
	PDE2A
	ADORA1
	CYP19A1
	PDE8B
	NT5E
	HDAC2
	PDE6C
	PDE11A
	PDE8A
	RINT1
	RIPK1
	PIK3R1
	WNT4
	TACR2
	AMPD3
	CX3CR1
	ADA
	HAP1
	IDNK
	SRD5A1
	PRLR
	NR3C1
	ANXA1
	HDAC1
	TFAP2C
	HMGA2
	TNFSF11
	NT5C1A
	ACTN3
	NOS1AP
	TAC1
	PHB
	SIRT1
	DGKI
	FKBP1A
	FURIN
	TOX3
	UTS2
	STUB1
	CTR9
	G6PD
	GNAT1
	SIX1
	QDPR
	TGFB1
	ATP11C
	KHDRBS1
	PPP3CB
	SYT2
	SIX4
	SIRT2
	SPI1
	HOMER1
	SHANK3
	TAS1R1
	TRIM28
	XRCC4
	MED1
	NKX3-1
	UBE2B
	ESR2
	HCN4
	EDN1
	CACNA1A
	STAT5A
	TP53
	GNAT3
	HELB
	COMT
	SLC26A6
	ADRA2A
	YWHAE
	CETN2
	POLA1
	CRP
	CETN1
	NUDT9
	PIK3CG
	BMP2
	TNF
	NEDD4
	AGT
	FER
	SHH
	SERPINB3
	FOXP3
	CXCL13
	ARID1A
	FGF10
	KCNB1
	LEF1
	PTK2B
	LIG4
	ADRBK1
	MAOB
	SORCS3
	ADRB1
	ADAM8
	VTI1A
	SLC44A4
	ADAP2
	LRRC8A
	FGFR2
	AURKA
	MCM3
	VCP
	GHRL
	BCL11B
	BCL2
	43532
	GAS6
	C5
	SREBF1
	DRD2
	PLN
	DNM3
	CHRNA3
	TCF3
	SRC
	LONP1
	XCL1
	HSP90AB1
	HIBADH
	STAP1
	HRC
	UTS2R
	SLC6A4
	HMGCR
	HIPK2
	PPP3CA
	RAPGEF2
	TET1
	C2CD5
	CSF2
	TALDO1
	BDKRB2
	KCNH2
	MMP28
	HIF1A
	KIT
	INS
	MTOR
	WNT10B
	SLC18A3
	ABCC4
	BNIP3
	ZFPM1
	GATA3
	UBR5
	AREG
	CRH
	ZFP42
	PIK3R6
	PF4
	ATP1A2
	AVPR2
	CAMK2D
	ADRA1B
	IL10
	NEFL
	UCN2
	ATP1A1
	RYR3
	PPP3R1
	SPX
	ATP2A1
	SMO
	RAG1
	RAB8B
	DKK3
	AHCYL1
	AQP1
	TNFAIP3
	TAC4
	DPPA3
	CASQ1
	FKBP1B
	CDC42
	IL4
	POLB
	IDO1
	ATP2B4
	CTNNB1
	PGLS
	SLC9A3R1
	IGF2
	HPS4
	TKT
	DRD1
	ADAP1
	EDA
	RYR2
	CD34
	HSP90AA1
	LTA
	SPR
	GPER1
	CBFA2T3
	CALHM1
	WNT5A
	SELP
	XRCC6BP1
	PARP10
	HPRT1
	AMICA1
	TAS1R3
	NOS1
	TREM1
	TAL1
	ALAD
	PAWR
	SOX9
	BMP5
	PDGFB
	RTN2
	CD63
	CAMK2G
	LAMP2
	NEFH
	GLYR1
	VDR
	GNAS
	NCBP2
	TPM1
	PIK3R5
	PCSK6
	TRIM24
	REST
	CRHR2
	HCN2
	RAG2
	NFX1
	TAS1R2
Testosterone	AR
	SRD5A1
	CYP17A1
	ESR1
	PGR
	NR3C1
	OPRK1
	ANXA1
	NR3C2
	ATP1A1
	NOTCH2
	SLC8A1
	F12
	PRLR
	TRPV1
	FADS2
	FADS1
	PTGS1
	PTGS2
	ELOVL4
	HSD11B1
	CREBBP
	RELA
	AKT1
	RUVBL1
	PAK6
	CASP8
	RANBP9
	PIAS1
	NCOR2
	NFKB1
	HDAC1
	STUB1
	GAPDH
	NR0B2
	SMAD4
	COX5B
	CALR
	XRCC5
	MAPK1
	CDK6
	HMGB2
	BRCA1
	TCF4
	CDC25B
	PTEN
	CASP3
	EP300
	NSD1
	FLNA
	NCOR1
	RAF1
	MED1
	GAK
	POU5F1
	GSK3A
	CDC37
	KLK3
	SART3
	MYBBP1A
	DAXX
	PSMC3IP
	CEBPA
	KAT7
	TP53
	PRKDC
	WHSC1
	CDC25A
	FOXA1
	WIPI1
	KDM1A
	SMAD3
	CCNH
	SUMO1
	NR0B1
	FHL2
	PNRC2
	PARP1
	TGFB1I1
	IFI16
	STAT3
	SELENBP1
	CCND1
	TDG
	TBP
	PELP1
	GTF2F1
	RUNX1
	APPBP2
	UBC
	ADAM10
	PA2G4
	SVIL
	APOL2
	TOP1
	AHR
	PRMT1
	ATF2
	CDK1
	TSG101
	POU2F2
	AES
	PATZ1
	GSK3B
	RUNX2
	UBE2I
	GRIP1
	PXN
	JMJD1C
	CASP7
	HDAC3
	SRY
	IL6ST
	GTF2F2
	SMARCC1
	NR2C2
	HMGB1
	JUN
	HSPB2
	CUL4B
	RAC3
	NCOA6
	SRC
	RNF4
	RCHY1
	PRPF6
	NRIP1
	UXT
	UBE3A
	CTDSP2
	PARK7
	DDC
	KLK2
	SP1
	NCOA3
	HSPA1A
	ACTB
	TRIP4
	YWHAQ
	SIN3A
	MAGEA11
	CCNE1
	PNRC1
	HIF1A
	POU2F1
	PSPC1
	GNB2L1
	RB1
	MDM2
	RAD9A
	PMEPA1
	NISCH
	CAV1
	SMAD1
	IDE
	HSD17B1
	TRIM68
	ETV5
	RBAK
	NCOA1
	PRDX1
	POLR2A
	TGIF1
	NCOA2
	DCC
	KAT2B
	BAG1
	HIPK3
	PIAS2
	ZMIZ1
	RNF6
	RAN
	NONO
	NR2C1
	NR5A1
	CDK7
	CTNNB1
	EFCAB6
	XRCC6
	GSN
	TMF1
	CDK9
	HSP90AA1
	RNF14
	CEBPB
	PIAS3
	MED14
	CASP1
	FOXO1
	KAT5
	HDAC4
	SMARCA4
	IARS
	DCAF6
	RAD54L2
	PIAS4
	GTF2H1
	EGFR
	KIF1A
	RNASEL
	ERG
	CALM1
	NCOA4
	TRIM24
	SLC25A4
	SPDEF
	DAP3
	CAMLG
	ATP1A3
	PPP3R2
	PPIA
	ATP1A2
	PPIF
	COL5A1
	NOX1
	CREBRF
	NKX3-1
	BMP2
	SHBG
	ATP1B1
	WNT4
	TGFB2
	DKK3
	NR1I3
	ALDH1A1
	FXYD2
	TSPO
	BMP5
	PDE8B
	S100A9
	AKAP13
	RAD51
	REST
3,5-Dihydroxybenzoic Acid	PLA2G2E
	AKR1C2
	PPARG
	MPO
	AKR1C1
	PTGS1
	PTGS2
	ALOX5
	IKBKB
	CHUK
	APOA2
	HSD17B2
	SERPINE1
	IL1B
	IL13
	SERPINB7
	AKR1C3
	IFNG
	AKR1C4
	TPMT
	NDRG2
	NAMPT
	RGCC
	FNDC5
	NR1H3
	OSBPL8
	AVPR1A
	IKBKE
	ITGB3
	METRNL
	MAPK9
	NCKAP1L
	STX3
	OXER1
	PNPLA2
	TNF
	PTGIS
	HEG1
	ITGAV
	PTPN2
	S100A8
	ALOX5AP
	AVP
	SLC6A4
	ROCK2
	BDKRB2
	NR1H2
	NEUROD2
	INS
	ANAPC2
	WNT11
	ALOX15B
	DHDH
	CDC20
	DNAJA3
	ROCK1
	COL1A1
	NR1D1
	ABCA1
	NAPRT
	MECOM
	ABHD5
	SNCA
	ADIPOQ
	CPLX2
	PPARA
	ALOX15
	ANXA1
	PAWR
	AKR1B10
	S100A9
	FABP3
	ABCG1
	PRDM16
	CCM2L
Musennin	GLRA3
	NR3C1
	ATP1A1
	GABRB3
17-Beta-Estradiol	ESR1
	NR1I2
	ESR2
	ANXA1
	NR3C1
	ESRRG
	CYP17A1
	PGR
	AR
	OPRK1
	NR3C2
	SLC6A3
	DRD5
	ESRRB
	SLC6A4
	PTGER1
	DRD1
	DRD4
	HTR7
	NOS2
	PTGER2
	PTGER4
	HTR1A
	CYP19A1
	DBH
	PTGER3
	DRD3
	DRD2
	SLC6A2
	NR0B1
	OPRM1
	OPRD1
	ALOX5
	TFAP2C
	SLC2A1
	TOX3
	SHH
	LEF1
	TGFB1
	AREG
	GPER1
	WNT5A
	MED1
	FGFR2
	ABCG2
	SOX9
	NKX3-1
	VDR
	WNT4
	ABCB1
	TRIM24
	ABCB4
	NR1I3
	CREBBP
	TUBA1B
	SMAD2
	MTCH2
	UBE3A
	MED12
	MVP
	FHL2
	MED17
	RELA
	HSP90AB1
	POLR2D
	PPP5C
	TUBB
	BAG1
	RBBP5
	PNRC2
	RXRB
	AKT1
	PAGR1
	POLR1B
	PAK6
	GADD45G
	EIF3I
	PIAS2
	SRD5A1
	VAV3
	DDX5
	PPARGC1A
	PTPN6
	FKBP5
	STAT3
	SP1
	PRMT2
	NFATC4
	MPG
	NCOA3
	CSNK2B
	CCND1
	TDG
	DUT
	ARNT
	TBP
	XBP1
	FHL1
	TNFRSF14
	SP3
	CHD9
	TRIP4
	ITGB3BP
	ERBB2
	PELP1
	YWHAQ
	PTGES3
	FOXO4
	BCAR1
	RBM39
	PIAS1
	HEXIM1
	FKBP4
	CHUK
	MMS19
	NR2C1
	PSMB9
	NCOR2
	NFKB1
	ZBTB17
	NOS3
	MNAT1
	SMARCD1
	RARA
	COPS5
	NR2F6
	CCNE1
	ISL1
	USF1
	HNF4A
	STUB1
	TAF10
	CDK7
	UBC
	CDKN1A
	CTNNB1
	PNRC1
	LDB1
	NR0B2
	MED20
	SMAD4
	PPP1CC
	CRIPAK
	GNAI1
	ESRRA
	STRN
	PPID
	MED23
	SVIL
	PTMA
	PIK3R3
	POU2F1
	MAPK1
	AHR
	CALM2
	SMARCA2
	PRMT1
	SMARCD3
	DDX54
	NELFB
	MAPK11
	POU1F1
	BRCA1
	MED13
	IGF1R
	SDF4
	MDM2
	HSP90AA1
	TAP1
	MED6
	CDC25B
	RNF14
	SHC1
	PRDM2
	PTEN
	CEBPB
	CAV1
	NCOA7
	POU2F2
	GADD45B
	MAPK3
	ATAD2
	TCF20
	ZBTB16
	PIAS3
	MED14
	MED24
	MAPK7
	EP300
	RBM23
	KMT2D
	PIK3R1
	RFX4
	NSD1
	YWHAH
	JUND
	POU4F1
	FOXO1
	MED7
	PTPN1
	JUNB
	KAT5
	UBE2I
	SMARCE1
	CCNT1
	GRIP1
	NCOR1
	HSD17B1
	TRIM28
	SOS1
	LCK
	CCNC
	ATP6AP1
	ASH2L
	CALM3
	MTA3
	SMARCA4
	CDK8
	GADD45A
	DDX17
	MAD2L1
	MAP3K1
	PPARGC1B
	RXRA
	TRAM1
	GTF2H1
	PAK1
	NR2F1
	REXO4
	POU4F2
	AKAP13
	NCOA1
	RPS6KA1
	HSPA4
	CITED1
	MAPK14
	PSMC5
	MKNK2
	EGFR
	RLIM
	KIF1A
	PSMC3IP
	TSC2
	CEBPA
	FLII
	MTA2
	PDLIM1
	TRIM25
	MTA1
	WDR5
	OXT
	STAT5A
	THRB
	PHB2
	DNTTIP2
	TRIM59
	TP53
	SLC30A9
	GTF2B
	NR1H4
	MGMT
	ARHGEF15
	TRRAP
	BTF3
	SREBF1
	CALM1
	ZNF398
	THRA
	NPPA
	SAFB
	MED21
	NCOA4
	BAZ1B
	NR2C2
	MED10
	KDM5A
	JUN
	BDNF
	RPS6KA3
	SAFB2
	PRKACA
	BCAS2
	NUCB2
	TADA3
	RXRG
	CUL4B
	WIPI1
	RBFOX2
	SMAD3
	RGS3
	AKT2
	CDK2
	NCOA6
	CCNH
	MED16
	SRC
	FOXO3
	RNF4
	NCOA2
	FGR
	PRPF6
	NRIP1
	DAP3
	CUEDC2
	ACTN2
	GRB2
	SLC12A1
	CYP11A1
	MTNR1B
	ASMT
	CALR
	SLC12A2
	SLC12A7
	MPO
	SLC12A6
	SLC12A5
	NQO2
	MTNR1A
	SLC12A4
	EPX
Allantoin	PDE4A
	GABRA2
	GABRD
	CHRNA4
	GABRB1
	ADORA2A
	GABRG3
	GRIN3B
	CHRNA7
	GRIN2A
	GABRE
	GABRA3
	ADORA2B
	GABRG1
	GABRP
	GRIA2
	GABRA4
	GABRB2
	GRIN2C
	GRIN2B
	GABRQ
	ADORA3
	GABRB3
	GRIN3A
	GABRA5
	GABRA6
	GABRA1
	PDE4B
	GABRG2
	GRIN2D
	ADORA1
	CHRFAM7A
	GRIK2
	GRIN1
	RIPK1
	PDE4D
	ADRA1B
	TACR2
	EPHX2
	CX3CR1
	ADA
	CHRNA9
	HAP1
	GRIK3
	FBP1
	HMGA2
	CDK5R2
	GRIA4
	PDE5A
	DGKI
	FURIN
	UTS2
	NAV2
	KHDRBS1
	ARPIN
	HOMER1
	SHANK3
	GRIA1
	CACNA1A
	COMT
	ADRA2A
	CETN2
	CRP
	CETN1
	TH
	PIK3CG
	KCNA1
	TNF
	AGT
	CYP11A1
	KCNB1
	ADRBK1
	PRSS12
	SORCS3
	SLC44A4
	NPY5R
	GHRL
	TBR1
	ADRA1D
	DRD2
	PLN
	DNM3
	CHRNA3
	CDK5R1
	CHRNB2
	HRC
	UTS2R
	HMGCR
	ADIRF
	ACHE
	ANK3
	COLQ
	UROD
	INS
	SLC18A3
	DRD4
	CRH
	STAR
	ATP1A2
	ATP13A2
	AVPR2
	CAMK2D
	ADCY3
	CDH8
	NCOA1
	RYR3
	SPX
	ATP2A1
	SMO
	LRRK2
	GRIK5
	GRIK4
	KMT2A
	GRIA3
	IDO1
	DRD1
	KDM6B
	PARK2
	LTA
	CALCA
	GRIK1
	CAMK2G
	KISS1
	NCBP2
	PCSK6
	GRM7
	FOS
3-Methylcyclotridecan-1-One	SCN11A
	SCN2B
	ABAT
	SCN1A
	SCN3B
	SCN3A
	SCN7A
	SCN5A
	SCN10A
	AKR1D1
	ALDH5A1
	SCN2A
	HDAC9
	TYR
	SCN9A
	SCN4A
	SCN4B
	SRD5A2
	ACADSB
	SCN8A
	SCN1B
	OGDH
	HDAC2
Morin	CRYZ
	VKORC1
	NQO1
Muscopyridine	GABRB2
	GABRB3
	F2
	GPR27
	CD36
	SDC4
	CD47
	BICD1
5-Cis-Cyclopentadecen-1-One	PDE7B
	PDE5A
	PDE9A
	PDE4A
	RYR1
	CYP17A1
	PDE3A
	ADORA2A
	ITPR1
	PDE6A
	PRKDC
	PIK3CD
	ESR1
	PDE3B
	PGD
	PIK3CA
	ADORA2B
	PDE1A
	PDE4D
	PGR
	PIK3CB
	ITPR2
	PDE1B
	OPRK1
	PDE7A
	ITPR3
	POLA2
	PDE4C
	PDE10A
	PDE1C
	ATM
	PDE6B
	PDE4B
	PDE2A
	ADORA1
	CYP19A1
	PDE8B
	NT5E
	HDAC2
	PDE6C
	PDE11A
	PDE8A
	NR3C2
	RINT1
	RIPK1
	PIK3R1
	WNT4
	TACR2
	AMPD3
	CX3CR1
	ADA
	HAP1
	IDNK
	SLC8A1
	F12
	TRPV1
	AR
	FADS2
	FADS1
	PTGS1
	PTGS2
	ELOVL4
	HDAC1
	TFAP2C
	HMGA2
	TNFSF11
	NT5C1A
	ACTN3
	NOS1AP
	TAC1
	PHB
	SIRT1
	DGKI
	FKBP1A
	FURIN
	TOX3
	UTS2
	STUB1
	CTR9
	G6PD
	GNAT1
	SIX1
	QDPR
	TGFB1
	ATP11C
	KHDRBS1
	PPP3CB
	SYT2
	SIX4
	SIRT2
	SPI1
	HOMER1
	SHANK3
	TAS1R1
	TRIM28
	XRCC4
	MED1
	NKX3-1
	UBE2B
	ESR2
	HCN4
	EDN1
	CACNA1A
	STAT5A
	TP53
	GNAT3
	HELB
	COMT
	SLC26A6
	ADRA2A
	YWHAE
	CETN2
	POLA1
	CRP
	CETN1
	NUDT9
	PIK3CG
	BMP2
	TNF
	NEDD4
	AGT
	FER
	SHH
	SERPINB3
	FOXP3
	CXCL13
	ARID1A
	FGF10
	KCNB1
	LEF1
	PTK2B
	LIG4
	ADRBK1
	MAOB
	SORCS3
	ADRB1
	ADAM8
	VTI1A
	SLC44A4
	ADAP2
	LRRC8A
	FGFR2
	AURKA
	MCM3
	VCP
	GHRL
	BCL11B
	BCL2
	43532
	GAS6
	C5
	SREBF1
	DRD2
	PLN
	DNM3
	CHRNA3
	TCF3
	SRC
	LONP1
	XCL1
	HSP90AB1
	HIBADH
	STAP1
	HRC
	UTS2R
	SLC6A4
	HMGCR
	HIPK2
	PPP3CA
	RAPGEF2
	TET1
	C2CD5
	CSF2
	TALDO1
	BDKRB2
	KCNH2
	MMP28
	HIF1A
	KIT
	INS
	MTOR
	WNT10B
	SLC18A3
	ABCC4
	BNIP3
	ZFPM1
	GATA3
	UBR5
	AREG
	CRH
	ZFP42
	PIK3R6
	PF4
	ATP1A2
	AVPR2
	CAMK2D
	ADRA1B
	IL10
	NEFL
	UCN2
	ATP1A1
	RYR3
	PPP3R1
	SPX
	ATP2A1
	SMO
	RAG1
	RAB8B
	DKK3
	AHCYL1
	AQP1
	TNFAIP3
	TAC4
	DPPA3
	CASQ1
	FKBP1B
	CDC42
	IL4
	POLB
	IDO1
	ATP2B4
	CTNNB1
	PGLS
	SLC9A3R1
	IGF2
	HPS4
	TKT
	DRD1
	ADAP1
	EDA
	RYR2
	CD34
	HSP90AA1
	LTA
	SPR
	GPER1
	CBFA2T3
	CALHM1
	WNT5A
	SELP
	XRCC6BP1
	PARP10
	HPRT1
	AMICA1
	TAS1R3
	NOS1
	TREM1
	TAL1
	ALAD
	PAWR
	SOX9
	BMP5
	PDGFB
	RTN2
	CD63
	CAMK2G
	LAMP2
	NEFH
	GLYR1
	VDR
	GNAS
	NCBP2
	TPM1
	PIK3R5
	PCSK6
	TRIM24
	REST
	CRHR2
	HCN2
	RAG2
	NFX1
	TAS1R2
Decamine	SCNN1A
	KCNJ8
	ADRA1A
	SCN1A
	SCNN1G
	HTR2A
	ADRB2
	ACACB
	MTAP
	ADRA2A
	TLR8
	ADRB1
	APRT
	ADRA1D
	PECR
	HRH1
	PRKAA1
	HTR7
	HRH2
	ADRA1B
	SCNN1D
	ADRA2C
	AOC3
	P4HA1
	SRPK2
	TLR7
	KCNJ1
	AGTR1
	ADRB3
	ACP1
	SCNN1B
	CYP2B6
	ADRA2B
	SLC6A2
	SAXO1
	SCT
	UGCG
	PHKG2
	APLP1
	ADK
	ACACA
	CHRNA7
	PNP
	ARRB2
	RAB7A
	PRKAA2
	HTR2C
	HSP90AB1
	ALDH3A2
	INS
	CALCOCO2
	SLC22A1
	AOC2
	ARRDC3
	CALCA
	HPRT1
	ACTN2
	KCNMB1
	KCNN1
	CACNA1H
	CYP17A1
	CYP21A2
	CACNA1A
	OPRD1
	KCNN2
	KCNH6
	HTR1B
	POMC
	ESR1
	GLRA3
	CACNA2D2
	DHODH
	NOS2
	PGR
	AR
	DRD2
	OPRK1
	OPRM1
	KCNH2
	HTR1A
	KCNN4
	DRD3
	SQLE
	GABRB3
	KCNMB2
	KCNMB4
	NOS3
	CALM2
	PPARA
	KCNMA1
	CALM3
	CYP19A1
	KCNH7
	KCNN3
	KCNMB3
	CALM1
	NR3C2
	SCN3A
	SCN2A
	ADCY6
	ACTN3
	RSAD2
	C1QTNF1
	APIP
	ORMDL1
	UTS2
	NAV2
	GBA2
	PCCA
	ANG
	P2RX2
	GAA
	GBA
	GSK3A
	FGF1
	OXT
	PC
	DLL1
	KLHL3
	RXFP4
	HTR2B
	WNK4
	LHCGR
	CETN2
	CETN1
	TLR3
	SPIDR
	SNX3
	VCAM1
	TRPV1
	ADI1
	BLM
	AGT
	CECR1
	GOT1
	HTR6
	ENOPH1
	CLN3
	POR
	PTK2B
	MAS1
	BMP6
	ADRBK1
	MAOB
	MCCC1
	P2RX3
	KCNJ11
	SERPINF2
	UCHL1
	MCCC2
	PDE4D
	MZB1
	HRH3
	P2RY1
	AGTRAP
	ORMDL2
	SGK1
	SREBF1
	GAL3ST1
	PLA2G1B
	DPYS
	MRI1
	MSTN
	CACNA1C
	AOC1
	MAOA
	TYMP
	UTS2R
	ARRB1
	TNNC1
	NCOA3
	HRH4
	NMUR2
	TLR9
	ACE
	UGT8
	AGTR2
	PYGM
	ABCC9
	CAV1
	PYGL
	AVPR2
	KCNJ10
	IL10
	GPR101
	PID1
	DECR2
	REN
	PDGFA
	MLYCD
	NMI
	PIK3AP1
	SEC14L2
	DRD5
	ZNF219
	RFK
	ZP3
	PCCB
	ATP2B4
	P4HA3
	SLC9A3R1
	NACA
	ADA
	POU1F1
	GPER1
	KCNE2
	ADORA1
	ADAM17
	P4HB
	NOS1
	RGS2
	TRPM8
	UNC93B1
	PDGFB
	P4HA2
	GDPGP1
	EGFR
	MECR
	TPM1
	RPS6KB1
	EDN2
	SYK
	PYGB
	PRKCD
	ABCG1
	RAD51
	PAICS
	ATP8A2
	TRPA1
Musclide A1	PROS1
	PROC
N-Nonane	This compound doesn't have any potential target with score larger than 20.
Estragole	PDE4A
	PDE3A
	CACNA1C
	TRDMT1
	DHFRL1
	DHFR
	PDE10A
	PDE2A
	TYMS
	SHMT1
	PDE3B
	DMTN
	KCNMA1
	ABCC2
	FOLR2
	PDE5A
	PDE9A
	TBPL1
	DNMT3A
	STUB1
	INSR
	P2RX2
	HTR2A
	SIRT2
	HCN4
	DPYD
	HOXA5
	FBLN1
	SLC22A6
	ASNS
	ADK
	IL1B
	NT5M
	P2RX3
	AURKA
	GAS6
	CMPK2
	PDE1B
	DPYS
	CHRNA3
	HSP90AB1
	CHRNB2
	SLC6A4
	DUT
	RAPGEF2
	ATIC
	AK9
	CDKN1A
	HIF1A
	FOLR1
	RAB8B
	HYAL2
	DNMT3B
	HSP90AA1
	DNMT1
	PARP10
	CHRNB4
	MGMT
	DTYMK
	PDE11A
	HCN2
Cholesteryl Ferulate	This compound doesn't have any potential target with score larger than 20.
Cyclotetradecan-1-One	SCN11A
	SCN2B
	ABAT
	SCN1A
	SCN3B
	SCN3A
	SCN7A
	SCN5A
	SCN10A
	AKR1D1
	ALDH5A1
	SCN2A
	HDAC9
	TYR
	SCN9A
	SCN4A
	SCN4B
	SRD5A2
	ACADSB
	SCN8A
	SCN1B
	OGDH
	HDAC2
3beta-Hydroxy-5alpha-Androstan-17-One	AR
	ESRRG
	COX6C
	COX5B
	COX7C
	COX1
	AKR1C2
	AKR1D1
	COX5A
	COX3
	COX7A1
	FECH
	COX4I1
	PLA2G1B
	COX6A2
	TYR
	ADH1C
	COX6B1
	FABP6
	CES1
	SRD5A2
	COX7B
	COX2
	COX8A
	NR1H4
	SCN11A
	SCN2B
	CACNA2D1
	PLAT
	ABAT
	SCN1A
	SCN3B
	SCN3A
	CACNA1A
	TRPV3
	SCN7A
	GRIN3B
	CACNA2D2
	GRIN2A
	SCN5A
	SCN10A
	ALDH5A1
	SCN2A
	PLG
	HDAC9
	OPRK1
	CACNA1B
	SCN9A
	GRIN2C
	GRIN2B
	SCN4A
	SCN4B
	GRIN3A
	ACADSB
	SCN8A
	SCN1B
	GRIN2D
	ADORA1
	TRPM8
	OGDH
	HDAC2
	GRIN1
	TRPA1
	ADRA1A
	HTR2A
	CYP21A2
	CHRM3
	CHRM1
	ADRA2A
	HTR2C
	ADRA1D
	DRD2
	CHRM5
	HRH1
	ACE
	HTR7
	HSD17B1
	HTR1A
	ADRA1B
	ADRA2C
	DRD1
	CYP19A1
	CHRM2
	CHRM4
	ADRA2B
	SLC6A2
	NR3C1
	ATP1A1
	COL5A1
	NOX1
	NKX3-1
	SHBG
	TGFB2
	NR1I3
	ALDH1A1
	TSPO
	S100A9
Alpha-Estradiol	ESR2
	ESR1
	NR1I2
	OPRD1
	OPRK1
	OPRM1
	ALOX5
	TFAP2C
	SLC2A1
	TOX3
	TGFB1
	MED1
	NKX3-1
	SHH
	LEF1
	FGFR2
	PGR
	ABCG2
	WNT4
	AREG
	ABCB4
	GPER1
	WNT5A
	SOX9
	VDR
	ABCB1
	TRIM24
Androsterone	AR
	ESRRG
	COX6C
	COX5B
	COX7C
	COX1
	AKR1C2
	AKR1D1
	COX5A
	COX3
	COX7A1
	FECH
	COX4I1
	PLA2G1B
	COX6A2
	TYR
	ADH1C
	COX6B1
	FABP6
	CES1
	SRD5A2
	COX7B
	COX2
	COX8A
	NR1H4
	SCN11A
	SCN2B
	CACNA2D1
	PLAT
	ABAT
	SCN1A
	SCN3B
	SCN3A
	CACNA1A
	TRPV3
	SCN7A
	GRIN3B
	CACNA2D2
	GRIN2A
	SCN5A
	SCN10A
	ALDH5A1
	SCN2A
	PLG
	HDAC9
	OPRK1
	CACNA1B
	SCN9A
	GRIN2C
	GRIN2B
	SCN4A
	SCN4B
	GRIN3A
	ACADSB
	SCN8A
	SCN1B
	GRIN2D
	ADORA1
	TRPM8
	OGDH
	HDAC2
	GRIN1
	TRPA1
	NR3C1
	ATP1A1
	COL5A1
	NOX1
	NKX3-1
	SHBG
	TGFB2
	NR1I3
	ALDH1A1
	TSPO
	S100A9
Cyclovirobuxine	MGAM
	SLC18A2
	CHRNA2
	TAAR1
Cholesterol	VDR
	CYP27B1
	GC
	SNW1
	ESR1
	PGR
	NFKB1
	AKR1C3
	CYP24A1
	GPBAR1
	SNAI2
	MED1
	SNAI1
	CYP3A4
	CALB1
	FGF23
	GFI1
	LANCL2
	WNT4
	TCF3
	BAX
	KL
	CYP2R1
	PML
	B4GALT1
	S100G
	CYP27A1
	KANK2
	IRX5
	RXRA
	NR1H4
	TRIM24
Muscone	SCN11A
	SCN2B
	ABAT
	SCN1A
	SCN3B
	SCN3A
	SCN7A
	SCN5A
	SCN10A
	AKR1D1
	ALDH5A1
	SCN2A
	HDAC9
	TYR
	SCN9A
	SCN4A
	SCN4B
	SRD5A2
	ACADSB
	SCN8A
	SCN1B
	OGDH
	HDAC2
2,6-Decamethylene Pyridine	GABRB2
	GABRB3
	F2
	GPR27
	CD36
	SDC4
	CD47
	BICD1
3alpha-Hydroxy-5alpha-Androstan-17-One	AR
	ESRRG
	COX6C
	COX5B
	COX7C
	COX1
	AKR1C2
	AKR1D1
	COX5A
	COX3
	COX7A1
	FECH
	COX4I1
	PLA2G1B
	COX6A2
	TYR
	ADH1C
	COX6B1
	FABP6
	CES1
	SRD5A2
	COX7B
	COX2
	COX8A
	NR1H4
	SCN11A
	SCN2B
	CACNA2D1
	PLAT
	ABAT
	SCN1A
	SCN3B
	SCN3A
	CACNA1A
	TRPV3
	SCN7A
	GRIN3B
	CACNA2D2
	GRIN2A
	SCN5A
	SCN10A
	ALDH5A1
	SCN2A
	PLG
	HDAC9
	OPRK1
	CACNA1B
	SCN9A
	GRIN2C
	GRIN2B
	SCN4A
	SCN4B
	GRIN3A
	ACADSB
	SCN8A
	SCN1B
	GRIN2D
	ADORA1
	TRPM8
	OGDH
	HDAC2
	GRIN1
	TRPA1
	NR3C1
	ATP1A1
	COL5A1
	NOX1
	NKX3-1
	SHBG
	TGFB2
	NR1I3
	ALDH1A1
	TSPO
	S100A9
Muscol	TRPV3
	OPRK1
	TRPM8
	TRPA1
	KCNK4
	SCN11A
	SCN2B
	ABAT
	SCN1A
	SCN3B
[truncated: 343 more rows]
