# Supplementary material for: A Network Pharmacology Approach to Investigate the Active Compounds and Mechanisms of Musk for Ischemic Stroke
Source: Evid Based Complement Alternat Med. 2020 Jul 3;2020:4063180. doi: 10.1155/2020/4063180 (PMC7354650; doi:10.1155/2020/4063180)
Supplement: Supplementary Materials — The detailed information of chemical composition and predicted target of musk (S1), ischemic stroke target (S2), string data (S3), compound target analysis data (S4), Gene Ontology enrichment analysis results (S5, S6, and S7), and KEGG enrichment analysis results (S8 and S9) used to support the findings of this study is included within the supplementary information files. [file 4063180.f1.zip › 4063180.f1/S2.xls]

## Sheet: Sheet1
DisGeNET	NCBI	HPO	OMIM	Drug Banks	TTD
ACE	MMP9	ACTA2	F5	FGA	PDE1A
AGER	MTHFR	ACVRL1	NOS3	ADORA1	PDE1B
AGTR1	ADAMTS13	COL4A1	F2	ADORA2A	PDE1C
APOE	ADIPOQ	ELN	ALOX5AP	ADORA2B	PARP1
AQP4	AGTR1	ENG	PRKCH		PARP2
ATM	APEX1	FBN1			HCAR2
BDNF	CCL2	FOXE3			CPB2
CD40	CD40	GUCY1A1			PLG
CIRBP	CRP	LOX			MMP3
COX2	F5	MFAP5			SCN1A
EPO	HMGB1	MYH11			PTAFR
F2	NAMPT	MYLK			SOD1
F2R	NFKB1	PIK3C2A			SOD2
F5	NOS3	PRKG1			SOD3
GRIK2	NPPB	SLC2A10			CAPN2
HMGB1	S100B	SMAD3			HTR2B
ICAM1	SOD1	SON
IGF1	TBXA2R	TGFB2
IL18	TLR4	TGFB3
IL1A	VEGFA	TGFBR1
IL1B	VWF	TGFBR2
IL1RN	ABCC8	ACTB
IL6	ACE	ACTG1
KDR	ADIPOR2	APP
MMP9	ADM	BRAF
MTHFR	AGER	C4A
NOS3	AGT	CALR
NOTCH3	AGTR2	CBS
PGR-AS1	ALDH2	COL3A1
PLAT	ALOX5AP	COL5A1
PLAU	ANGPT1	CRELD1
PTGS2	ANXA5	CTLA4
REST	APOA5	CTNNB1
SERPINE1	APOB	FAS
SLC33A1	APOE	GATA4
TLR4	APOH	GATA6
TNF	AVP	GCDH
TP53	BDNF	GDF2
TRPM7	C3	GLA
VEGFA	C5	HLA-B
ABCC8	CALM1	HTRA1
ADIPOQ	CBS	IKBKG
ADM	CD40LG	IL10
AGT	CNR1	IL12B
ANGPT1	CST3	IL23R
APP	CX3CR1	JAK2
BCL2	CXCL8	LMNA
C20orf181	CYP11B2	MEFV
CALM2	CYP2C19	MPL
CARTPT	CYP4F2	MYH7
CASP3	ENO2	NAGS
CASP6	EPO	NOTCH3
CBS	ESR1	NR2F2
CCL11	F2	PIGA
CCL2	F3	PIK3CA
CCL3	F7	PTPN22
CEACAM1	F8	SCNN1A
CREB1	FABP3	SCNN1B
CXCL12	FAS	SCNN1G
EDIL3	FGB	SH2B3
EDNRB	FGF2	SMAD4
EGR1	GCKR	SMARCAL1
GFAP	GPX1	STAT4
GPNMB	HABP2	TET2
HIF1A	HGF	THPO
HMOX1	HIF1A	TP53
HSPA12B	HMOX1	ZMPSTE24
HSPA1A	HP
HSPA1B	HSPA1A
HSPA4	ICAM1
IL10	IGF1
IL16	IL10
IL17A	IL4
IL21	IL6
JUN	KDR
KCNJ13	LDLR
LIMK1	LPL
MAP3K11	LTA
MAPK1	MDK
MAPK14	MIR124-3
MIR210	MIR146A
MIR29B1	MIR210
MIR29B2	MIR223
MIR424	MIR497
MPO	NEWENTRY
MSC	NOTCH1
NAMPT	NOTCH3
NFKB1	OLR1
NOS2	PDE4D
NPAS4	PLA2G7
NPPA	PPARG
NR3C2	PRKCH
NTF3	PRNP
PARP1	PROCR
PINK1	PROZ
PLA2G4A	PTGS2
PLG	RBP4
PPARG	RETN
PROZ	SAA1
PTGIS	SELP
REN	SERPINE1
RNF146	SERPINF2
SELE	SLC6A4
SELP	SLC8A1
SEMA6A	TAC1
SERPINI1	TBXAS1
SGK1	TF
SLC1A2	TGFB1
SLC8A1	THBD
SOD1	TIMP3
STC1	TLR2
TGFB1	TNF
TNFRSF12A	TNFSF4
UCP2	TP53
VWF	TRAF6
ABCA1	ABCA1
ABO	ABCB1
ACE2	ABCC6
ADAMTS1	ABCG1
ADAMTS13	ABCG8
ADD3	ABO
ADGRB2	ACE2
AKT1S1	ACOT4
ALB	ACTA2
ALDH2	ACYP2
ALOX5	ADA
ALOX5AP	ADAM10
ANGPT2	ADAM17
ANGPTL1	ADAMTS1
ANXA1	ADAMTS7
APOH	ADCYAP1R1
APRT	ADD1
ARHGEF7	ADH1B
ASCC1	ADRA2A
ASIC1	ADRA2B
BACE1	ADRA2C
BAZ1B	ADRB1
BBC3	ADRB2
BIRC5	AGXT2
CALM1	AHSG
CALM3	AIFM1
CAPN1	AIMP1
CASP9	ALB
CAT	ALCAM
CBSL	ALDH1L1
CCL4	ALDH1L1-AS2
CCNH	ALKBH8
CCR4	ALOX15
CD14	ALOX5
CD40LG	ALPL
CDK5	ANGPT2
CDKN2B-AS1	ANGPTL3
CEBPB	ANGPTL4
CHRM1	ANKS1A
CLIP2	AOC3
COX1	APLNR
COX3	APOA1
CPB2	APOC3
CRP	APOD
CSF2	APOL1
CTLA4	APOM
CTSG	APP
CX3CL1	AQP4
CXCL10	ARHGEF10
CXCL8	ASPM
CYBB	ATP13A2
CYCS	ATP1A2
CYP4A11	B2M
CYP4F2	BCL2
DDIT3	BCL2L1
DECR1	BIRC5
DIABLO	BMP7
DLG4	BRAP
DSCAM	BRCA2
DYNLL1	BRINP3
EBP	BSG
ELN	C4B
EMP1	CACNA1A
EPHX2	CACNA1B
ESR1	CACNA1C
ESR2	CALB2
F2RL3	CALCA
F7	CALM2
FGA	CAPN10
FGB	CARD8
FGF2	CASP3
FOS	CASP8
FOSB	CAT
G6PD	CAV1
GABPA	CCL11
GOLT1A	CCL5
GOLT1B	CCR2
GOT1	CD28
GPX1	CD34
GRN	CD59
GTF2I	CD74
GTF2IRD1	CDC42
H2AFX	CDH13
HBEGF	CDH5
HGF	CDKN2A
HLA-DPB1	CDKN2B
HSPB1	CDKN2B-AS1
HSPB2	CELSR1
HSPB3	CELSR2
HTRA2	CETP
IL10RB	CFH
IL12RB1	CFHR4
IL17C	CFHR5
IL17RA	CHI3L1
IL22	CKM
IL4	CLEC16A
IRAK1	CNNM2
ISYNA1	COL4A1
ITGAL	COL4A2
JAK2	CP
JUNB	CPB2
JUND	CPS1
KAT5	CREB1
KCNA3	CSF2
KCNK2	CSF3
KCNK3	CSF3R
KIAA1147	CSN3
KIDINS220	CTLA4
KLK4	CUBN
LGALS2	CX3CL1
LIF	CXCL1
LMO1	CXCL12
LPL	CXCL16
LTA	CXCR2
MAP2	CYBA
MAP2K1	CYP17A1
MAP2K7	CYP1A1
MAP3K5	CYP24A1
MAPK3	CYP2C8
MBL2	CYP2C9
MBP	CYP2E1
MDK	CYP2J2
MIR320A	CYP2R1
MMP2	CYP3A5
ND1	CYP4A11
ND4	DCN
ND5	DECR1
ND6	DEFB4A
NDRG4	DKK1
NFE2L2	DLG4
NFKBIA	DNM1P37
NGB	DOCK7
NPPB	DSP
NPY	ECE1
NR3C1	EDN1
NRN1	EDNRA
NRP1	EDNRB
ODC1	EEF1A1
OLR1	EGLN1
PAWR	ENOX1
PDE4D	ENPP1
PHGDH	ENTPD1
PIK3CA	EPHX2
PIK3CB	ERCC4
PIK3CD	ERN1
PIK3CG	ERRFI1
PIK3R3	F10
PLA2G7	F11
PLSCR1	F12
POU5F1	F13A1
PPIG	F13B
PRH2	F2R
PRKCH	F9
PRNP	FABP1
PRTN3	FABP2
PSPN	FABP4
PTGER1	FADS1
PTPN22	FADS2
PWAR4	FAIM2
RAC1	FCGR2A
RAMP2	FGA
RB1	FGFR4
RELA	FGG
RFC2	FLG
RIPK1	FN1
RIPK3	FNDC5
ROS1	FOLH1
RPL13A	FUT2
SCNN1B	FYN
SCNN1G	G6PD
SEMA3A	GABPB1
SERPINB6	GAS5-AS1
SERPINC1	GCH1
SERPINE2	GCK
SETD2	GDF15
SFTPD	GDNF
SHH	GFAP
SIRT1	GGA3
SLC19A1	GGCX
SLC6A1	GGT1
SOD2	GH1
SP1	GHRL
SPP1	GJA4
SRR	GLA
STAT3	GNMT
TAT	GP1BA
TBL2	GP6
TBXAS1	GP9
TGFBR2	GPX3
TLX2	GRIK2
TM7SF2	GRIN1
TNFRSF1A	GRIN2B
TNFRSF1B	GRIN3A
TRNF	GSTA4
TRNH	GSTM1
TRNL1	GSTO1
TRNQ	GSTO2
TRNS1	GSTT1
TRNS2	GZMB
TRNW	H19
VDR	HAMP
YWHAZ	HAVCR2
ZBTB7C	HBA1
ZC3H12A	HDAC9
ZRANB3	HFE
A2M	HLA-DRB1
ABCB1	HNF1A
ABCG2	HRH1
ACD	HRH2
ACKR3	HRH3
ACOT4	HSPA12B
ACTA2	HSPA4
ACVRL1	HSPB1
ADAM10	HTR2A
ADAM11	HVCN1
ADD1	IGF1R
ADH1B	IGFBP1
ADORA1	IGFBP3
ADRA1A	IL10RA
ADRA2B	IL10RB
ADRB2	IL16
AGXT2	IL18
AHSG	IL1A
AIF1	IL1B
AIFM1	IL1R1
AKAP1	IL1RN
AKR1A1	IL20
AKT1	IL21
ALDH1L1	IL32
ALOX12	IL33
ALOX15	IL5RA
ANGPTL3	IL6R
APAF1	IMPA2
APEX1	INPP5D
APLNR	IRS1
APOA1	IRX4
APOA5	ITGA2
APOB	ITGA2B
APOL1	ITGA9
AQP3	ITGB1
AQP5	ITGB2
AQP8	ITGB3
AR	ITIH4
ARL6IP6	ITLN1
ASIC5	JAK2
AVP	KALRN
BAD	KCNE2
BARD1	KCNK10
BCL2A1	KCNK17
BCL2L1	KCNK2
BECN1	KCNN4
BHMT	KITLG
BMP6	KLK1
BMP7	KLKB1
BRCA2	LBP
BRS3	LCAT
BSG	LCN2
BTF3P11	LEP
BTG2	LEPQTL1
C3	LEPR
C5	LGALS2
CAD	LGALS3
CAMKK2	LINC02113
CAPN10	LINC02145
CARD8	LMNA
CASP12	LOX
CAST	LPA
CAV1	LPAL2
CCL20	LRP1
CCL22	LTA4H
CCL5	LTB4R
CCR5	LTB4R2
CDC42	LTC4S
CDK4	MADD
CDKN2A	MAFB
CDKN2B	MALAT1
CDKN3	MANF
CELSR1	MAP2K4
CETP	MAP3K14
CFH	MAPK1
CHDH	MAPK3
CHI3L1	MAPT
CHIT1	MCF2L
CHMP2B	MEPE
CIITA	MGP
CILP2	MIAT
CITED2	MIF
CLU	MIR124-1
CNR2	MIR124-2
COL11A2	MIR125A
COL4A1	MIR125B1
COL4A2	MIR125B2
COMT	MIR126
COX8A	MIR130A
CP	MIR130B
CRH	MIR143
CRTC1	MIR145
CRYZ	MIR149
CSF2RB	MIR150
CSF3	MIR155
CSPG4	MIR15A
CTSB	MIR16-1
CTSC	MIR181B1
CTSL	MIR181B2
CXCR6	MIR185
CYBA	MIR196A2
CYP11B2	MIR200B
CYP2B6	MIR206
CYP2B7P	MIR21
CYP2C19	MIR215
CYP2C8	MIR221
CYP2C9	MIR25
CYP2J2	MIR26B
CYP3A4	MIR30A
DBH	MIR323A
DBP	MIR335
DCAF7	MIR34A
DCR	MIR361
DEFB1	MIR382
DEFB104A	MIR422A
DEFB104B	MIR4437
DEFB4A	MIR487B
DEFB4B	MIR491
DHX40	MIR495
DKK1	MIR499A
DMRT1	MIR9-1
DPYSL2	MIR93
DRD2	MIRLET7B
DUOX1	MIRLET7I
DUOX2	MMP1
DUSP6	MMP10
DVL1	MMP12
EDN1	MMP14
EDNRA	MMP2
EEF1A2	MMP3
EGLN1	MMP8
EIF3E	MPO
ENDOG	MRAS
ENG	MT-ND1
ENTPD1	MTAP
EPAS1	MTRR
EPHB2	MYD88
EPOR	MYT1L
ERBB4	NAA25
ERCC6L	NBPF3
EZH2	NDRG2
F11	NDUFA13
F12	NDUFC2
F13A1	NEFH
F3	NES
F8	NFE2L2
FABP1	NGB
FABP2	NGF
FABP4	NGFR
FADS1	NINJ2
FAS	NLGN1
FASLG	NLRP3
FBN1	NLRX1
FBN2	NOS1
FGF1	NOS2
FGF13	NOX4
FGG	NPPA
FLAD1	NPR3
FLG	NPY
FOLH1	NQO1
GABPB1	NR1H3
GAL	NR3C1
GALNT2	NR4A2
GAMT	NT5C2
GC	NTN1
GCH1	NTNG1
GDF15	OBI1
GDNF	OGG1
GFRA1	ORM1
GGA3	OSM
GJA1	P2RY1
GJA4	P2RY12
GLA	P2RY2
GLUD1	PAPPA
GNB3	PARK7
GNLY	PARP1
GP6	PCSK9
GPR42	PDE11A
GPX3	PDE4DIP
GRIA2	PDGFD
GRIN1	PDGFRB
GRM2	PEAR1
HABP2	PECAM1
HBA1	PEMT
HDAC9	PHACTR1
HFE	PITX2
HOMER1	PLA2G15
HOMER2	PLAT
HP	PLAUR
HSPA2	PLPP3
HSPA8	PON1
HSPA9	PON2
IFNB1	PPARA
IGF1R	PPARD
IL17B	PPM1A
IL18RAP	PRL
IL1F10	PROC
IL20	PSMA6
IL5	PSMB7
IL5RA	PSMB9
IL6ST	PSPH
IL9	PSRC1
IMPA2	PTCSC3
INTS6	PTEN
IRAK4	PTGES
IRF4	PTGS1
IRF9	PTX3
IRX4	RAI1
ITGA2	RAMP1
ITGA2B	RAPGEF3
ITGB3	RARRES2
KALRN	RASD1
KCNK10	RASIP1
KCNK17	RBPJ
KCNQ1	RELA
KDM2B	REST
KLF2	RHOA
KMT2A	RIPK3
LCAT	RNASE3
LDLR	RNF146
LGALS1	RNLS
LGALS3	ROCK2
LLGL2	ROPN1
LOC107984148	ROS1
LONP1	RPL13A
LPA	RTN4R
LPAR2	S100A9
LRP1	S1PR1
LRP6	SCN1A
LTA4H	SELE
LTC4S	SELENOS
MADD	SELL
MAPK8	SELPLG
MAPT	SERPINA1
MARK2	SERPINA12
MASP2	SERPINA3
MDH2	SERPINE2
MEPE	SERPINI1
METTL18	SGK1
MIAT	SH2B3
MIP	SHISA6
MIR103A1	SIGMAR1
MIR107	SLC11A2
MIR130A	SLC17A3
MIR132	SLC19A1
MIR143	SLC1A1
MIR146A	SLC1A2
MIR195	SLC22A3
MIR21	SLC29A1
MIR223	SLC9A1
MIR491	SMARCA4
MIR497	SMG6
MIR499A	SMTN
MLXIPL	SOAT1
MMD	SOCS1
MMP1	SOCS3
MMP10	SOD2
MMP12	SOD3
MMP13	SORT1
MMP14	SP1
MMP3	SPARCL1
MMP7	SPP1
MMRN1	SPSB4
MOK	SPTBN5
MSI1	SREBF1
MTR	SREBF2
MTRR	SRSF3
MUSK	STAT3
MUT	STUB1
NAIP	SUOX
NDUFA13	SUPT3H
NDUFC2	TAFA3
NEIL1	TCF21
NES	TCF7L2
NINJ2	TCN1
NOS1	TCN2
NOTCH1	TERC
NPR2	TERT
NPR3	TFPI
NPTXR	THBS1
NQO1	THPO
NR4A3	TIMD4
NRF1	TIMP1
NRG1	TLR7
NUP214	TLR8
OAZ1	TMEM163
OGG1	TNFAIP8L2
OPRM1	TNFRSF11B
OR2AG1	TNFRSF1A
ORAI1	TNFRSF4
P2RX7	TNFRSF9
P2RY1	TNFSF10
P2RY12	TNFSF14
P2RY2	TNNI3
P4HB	TNNT2
PADI4	TRAF3
PAK1	TRPM7
PART1	TSPYL6
PC	TTLL5
PCNA	TWIST1
PCSK9	TXN
PDE11A	TXNIP
PDE4DIP	UCHL1
PDGFA	UCP2
PECAM1	UGT1A1
PGF	USF1
PHLPP1	VCAM1
PIN1	VDR
PITX2	VKORC1
PLA2G1B	WDR12
PLA2G2A	WRN
PLA2G6	XBP1
PLIN1	XRCC1
PLK2	XYLB
PON1	ZBTB41
PON2	ZBTB7C
PPARA	ZC3H12A
PPP1R15A	ZC3HC1
PRH1	ZDHHC22
PRKACA	ZFHX3
PRKACB	ZNF208
PRKCA	ZPR1
PRKCD
PRKG1
PROCR
PSEN1
PSMA6
PTCSC3
PTGDR
PTGER2
PTGES
PTGS1
PTK2B
PTPRG
RAMP1
RAPSN
RASIP1
RCOR1
REM1
RET
RNLS
ROPN1
RUVBL2
S100B
SAA1
SAA@
SCARB1
SCN5A
SELENOS
SELPLG
SERPINA3
SERPINA9
SERPINF1
SHC1
SHMT1
SLC11A2
SLC17A3
SLC29A1
SLC2A10
SLC8A2
SLC8A3
SLC9A6
SMURF2
SORBS1
SPIDR
SRC
SRF
SSTR4
STIM1
SULT1E1
SYP
TBC1D9
TBXA2R
TCN2
TEK
TF
TFPI
TFPI2
TH
THBD
TICAM1
TIMP2
TIMP3
TJP1
TLR3
TLR7
TLR8
TNFRSF11B
TNFRSF13B
TNFSF10
TNFSF12
TNFSF12-TNFSF13
TNFSF14
TNFSF4
TRAF1
TRAF6
TREM2
TRIB1
TRIM69
TRPM4
TSPAN33
TTC7B
TTR
TXN
UBR3
UCP3
UGT1A1
VCAM1
VIM
VIP
VKORC1
VPS51
WRN
XRCC1
XYLB
YWHAB
ZFHX3
