# Supplementary material for: A Network Pharmacology Approach to Investigate the Active Compounds and Mechanisms of Musk for Ischemic Stroke
Source: Evid Based Complement Alternat Med. 2020 Jul 3;2020:4063180. doi: 10.1155/2020/4063180 (PMC7354650; doi:10.1155/2020/4063180)
Supplement: Supplementary Materials — The detailed information of chemical composition and predicted target of musk (S1), ischemic stroke target (S2), string data (S3), compound target analysis data (S4), Gene Ontology enrichment analysis results (S5, S6, and S7), and KEGG enrichment analysis results (S8 and S9) used to support the findings of this study is included within the supplementary information files. [file 4063180.f1.zip › 4063180.f1/S3.Target String.xls]

## Sheet: Sheet1
#node1	node2	node1_string_internal_id	node2_string_internal_id	node1_external_id	node2_external_id	neighborhood_on_chromosome	gene_fusion	phylogenetic_cooccurrence	homology	coexpression	experimentally_determined_interaction	database_annotated	automated_textmining	combined_score
CASP8	CASP3	4442125	4438651	9606.ENSP00000351273	9606.ENSP00000311032	0	0	0	0.835	0.061	0.993	0.9	0.978	0.999
FOS	JUND	4438204	4434256	9606.ENSP00000306245	9606.ENSP00000252818	0	0	0	0	0.093	0.885	0.9	0.92	0.999
P4HB	CALR	4439955	4439395	9606.ENSP00000327801	9606.ENSP00000320866	0	0	0	0	0.856	0.87	0	0.958	0.999
SERPINE1	PLAT	4433266	4433132	9606.ENSP00000223095	9606.ENSP00000220809	0	0	0	0	0.148	0.881	0.9	0.956	0.999
AKT1	NOS3	4450372	4437409	9606.ENSP00000451828	9606.ENSP00000297494	0	0	0	0	0.049	0.693	0.9	0.97	0.999
MT-CO2	MT-CO1	4442560	4442477	9606.ENSP00000354876	9606.ENSP00000354499	0.295	0.839	0.441	0	0.959	0.83	0.9	0.969	0.999
FOS	JUNB	4438204	4437951	9606.ENSP00000306245	9606.ENSP00000303315	0	0	0	0	0.824	0.884	0.9	0.852	0.999
AGT	REN	4442719	4436004	9606.ENSP00000355627	9606.ENSP00000272190	0	0	0	0	0.061	0.87	0.9	0.972	0.999
ATM	TP53	4436300	4435880	9606.ENSP00000278616	9606.ENSP00000269305	0	0	0	0	0	0.563	0.9	0.984	0.999
JUN	FOS	4443699	4438204	9606.ENSP00000360266	9606.ENSP00000306245	0	0	0	0	0.656	0.879	0.9	0.975	0.999
TNF	RIPK1	4448041	4434726	9606.ENSP00000398698	9606.ENSP00000259808	0	0	0	0	0.061	0.993	0.9	0.781	0.999
CDC42	PAK1	4446990	4436295	9606.ENSP00000383118	9606.ENSP00000278568	0	0	0	0	0.064	0.981	0.9	0.915	0.999
AKT1	PIK3CA	4450372	4435346	9606.ENSP00000451828	9606.ENSP00000263967	0	0	0	0	0.063	0.468	0.9	0.978	0.998
CASP8	RIPK1	4442125	4434726	9606.ENSP00000351273	9606.ENSP00000259808	0	0	0	0	0.063	0.866	0.9	0.914	0.998
PLG	SERPINE1	4438461	4433266	9606.ENSP00000308938	9606.ENSP00000223095	0	0	0	0	0.063	0.435	0.9	0.978	0.998
ITGB3	SHC1	4450406	4448165	9606.ENSP00000452786	9606.ENSP00000401303	0	0	0	0	0.062	0.974	0.9	0.161	0.997
CALM1	CACNA1C	4441930	4435696	9606.ENSP00000349467	9606.ENSP00000266376	0	0	0	0	0.08	0.974	0.8	0.536	0.997
AKT1	CTNNB1	4450372	4441426	9606.ENSP00000451828	9606.ENSP00000344456	0	0	0	0	0.083	0.444	0.9	0.959	0.997
IL10	TNF	4448642	4448041	9606.ENSP00000412237	9606.ENSP00000398698	0	0	0	0	0.097	0	0.9	0.974	0.997
PIK3CA	PIK3R3	4435346	4435132	9606.ENSP00000263967	9606.ENSP00000262741	0	0	0	0	0.062	0.925	0.9	0.652	0.997
ALOX5AP	ALOX5	4451430	4444382	9606.ENSP00000479870	9606.ENSP00000363512	0	0	0	0	0.32	0.521	0.9	0.939	0.997
PIK3CB	PIK3R3	4436798	4435132	9606.ENSP00000289153	9606.ENSP00000262741	0	0	0	0	0.062	0.925	0.9	0.74	0.997
PTEN	TP53	4443848	4435880	9606.ENSP00000361021	9606.ENSP00000269305	0	0	0	0	0	0.472	0.9	0.963	0.997
SMAD4	SMAD3	4441161	4440414	9606.ENSP00000341551	9606.ENSP00000332973	0	0	0	0.869	0.082	0.974	0.9	0.973	0.997
KAT5	ATM	4441035	4436300	9606.ENSP00000340330	9606.ENSP00000278616	0	0	0	0	0.082	0.457	0.9	0.932	0.996
IL10	IL1B	4448642	4435241	9606.ENSP00000412237	9606.ENSP00000263341	0	0	0	0	0.085	0	0.9	0.96	0.996
BDNF	NGFR	4448727	4432715	9606.ENSP00000414303	9606.ENSP00000172229	0	0	0	0	0	0.298	0.9	0.948	0.996
PTEN	PIK3CA	4443848	4435346	9606.ENSP00000361021	9606.ENSP00000263967	0	0	0	0	0.065	0.186	0.9	0.96	0.996
BCL2	CASP8	4446777	4442125	9606.ENSP00000381185	9606.ENSP00000351273	0	0	0	0	0	0.993	0	0.43	0.996
TP53	SIRT1	4435880	4432849	9606.ENSP00000269305	9606.ENSP00000212015	0	0	0	0	0.061	0.472	0.9	0.931	0.996
AGT	ACE	4442719	4436887	9606.ENSP00000355627	9606.ENSP00000290866	0	0	0	0	0.061	0.379	0.9	0.948	0.996
JUN	MAPK1	4443699	4432880	9606.ENSP00000360266	9606.ENSP00000215832	0	0	0	0	0	0.411	0.9	0.952	0.996
AGTR1	AGT	4449040	4442719	9606.ENSP00000419422	9606.ENSP00000355627	0	0	0	0	0.083	0.709	0.9	0.87	0.996
F2	PROC	4438421	4433614	9606.ENSP00000308541	9606.ENSP00000234071	0	0	0.4	0.741	0.549	0.909	0.9	0.582	0.996
JUN	MAPK3	4443699	4435180	9606.ENSP00000360266	9606.ENSP00000263025	0	0	0	0	0	0.402	0.9	0.929	0.995
SERPINF2	PLG	4439481	4438461	9606.ENSP00000321853	9606.ENSP00000308938	0	0	0	0	0.188	0.435	0.9	0.92	0.995
SRC	STAT3	4444215	4435468	9606.ENSP00000362680	9606.ENSP00000264657	0	0	0	0	0.058	0.432	0.9	0.92	0.995
JUN	MAPK14	4443699	4433482	9606.ENSP00000360266	9606.ENSP00000229795	0	0	0	0	0	0.471	0.9	0.918	0.995
IL10	STAT3	4448642	4435468	9606.ENSP00000412237	9606.ENSP00000264657	0	0	0	0	0	0.429	0.9	0.933	0.995
AKT1	TP53	4450372	4435880	9606.ENSP00000451828	9606.ENSP00000269305	0	0	0	0	0.054	0.147	0.9	0.941	0.994
AKT1	STAT3	4450372	4435468	9606.ENSP00000451828	9606.ENSP00000264657	0	0	0	0	0	0.124	0.9	0.938	0.994
TNF	VCAM1	4448041	4437090	9606.ENSP00000398698	9606.ENSP00000294728	0	0	0	0	0	0	0.9	0.949	0.994
CAV1	NOS3	4440933	4437409	9606.ENSP00000339191	9606.ENSP00000297494	0	0	0	0	0	0.379	0.9	0.915	0.994
ADIPOQ	PPARG	4447630	4436745	9606.ENSP00000389814	9606.ENSP00000287820	0	0	0	0	0.063	0	0.9	0.943	0.994
SMARCA4	BAZ1B	4447900	4441256	9606.ENSP00000395654	9606.ENSP00000342434	0	0	0	0	0.21	0.838	0.9	0.518	0.993
IL10	CSF2	4448642	4437349	9606.ENSP00000412237	9606.ENSP00000296871	0	0	0	0	0.061	0	0.9	0.937	0.993
TLR3	RIPK1	4437339	4434726	9606.ENSP00000296795	9606.ENSP00000259808	0	0	0	0	0.061	0.834	0.9	0.63	0.993
AGTR2	AGT	4443835	4442719	9606.ENSP00000360973	9606.ENSP00000355627	0	0	0	0	0.055	0.67	0.9	0.819	0.993
CALM1	NOS2	4441930	4439909	9606.ENSP00000349467	9606.ENSP00000327251	0	0	0	0	0	0.964	0.6	0.485	0.992
SRC	CAV1	4444215	4440933	9606.ENSP00000362680	9606.ENSP00000339191	0	0	0	0	0	0.389	0.9	0.886	0.992
TNF	IL4	4448041	4433533	9606.ENSP00000398698	9606.ENSP00000231449	0	0	0	0	0	0	0.9	0.931	0.992
RELA	NFKB1	4447098	4433374	9606.ENSP00000384273	9606.ENSP00000226574	0	0	0	0.776	0.133	0.9	0.9	0.886	0.992
FOS	MAPK1	4438204	4432880	9606.ENSP00000306245	9606.ENSP00000215832	0	0	0	0	0	0.523	0.9	0.852	0.992
AKT1	ESR1	4450372	4448358	9606.ENSP00000451828	9606.ENSP00000405330	0	0	0	0	0.055	0.407	0.9	0.867	0.991
IL1B	IL4	4435241	4433533	9606.ENSP00000263341	9606.ENSP00000231449	0	0	0	0	0	0	0.9	0.916	0.991
IGF1R	PIK3R3	4435797	4435132	9606.ENSP00000268035	9606.ENSP00000262741	0	0	0	0	0	0.593	0.8	0.904	0.991
GRIN2B	GRIN1	4451206	4443769	9606.ENSP00000477455	9606.ENSP00000360608	0	0	0	0.697	0.267	0.851	0.9	0.935	0.991
JUN	TP53	4443699	4435880	9606.ENSP00000360266	9606.ENSP00000269305	0	0	0	0	0	0.127	0.9	0.912	0.991
AVP	CRH	4445364	4436231	9606.ENSP00000369647	9606.ENSP00000276571	0	0	0	0	0.064	0	0.9	0.91	0.99
TP53	MAPK14	4435880	4433482	9606.ENSP00000269305	9606.ENSP00000229795	0	0	0	0	0	0.472	0.9	0.837	0.99
AR	SRC	4444436	4444215	9606.ENSP00000363822	9606.ENSP00000362680	0	0	0	0	0	0.407	0.9	0.857	0.99
ESR1	SRC	4448358	4444215	9606.ENSP00000405330	9606.ENSP00000362680	0	0	0	0	0.061	0.52	0.9	0.803	0.99
KAT5	TP53	4441035	4435880	9606.ENSP00000340330	9606.ENSP00000269305	0	0	0	0	0	0.379	0.9	0.854	0.99
PARP1	CASP3	4442743	4438651	9606.ENSP00000355759	9606.ENSP00000311032	0	0	0	0	0.062	0.472	0.9	0.839	0.99
AKT1	PTEN	4450372	4443848	9606.ENSP00000451828	9606.ENSP00000361021	0	0	0	0	0.06	0.472	0	0.981	0.99
TNF	RELA	4448041	4447098	9606.ENSP00000398698	9606.ENSP00000384273	0	0	0	0	0	0.428	0.9	0.849	0.99
STAT3	MAPK1	4435468	4432880	9606.ENSP00000264657	9606.ENSP00000215832	0	0	0	0	0.06	0.384	0.9	0.837	0.989
CASP3	MAPK14	4438651	4433482	9606.ENSP00000311032	9606.ENSP00000229795	0	0	0	0	0.061	0.521	0.9	0.793	0.989
TNF	IL1B	4448041	4435241	9606.ENSP00000398698	9606.ENSP00000263341	0	0	0	0	0.441	0	0	0.981	0.989
ESR1	IGF1R	4448358	4435797	9606.ENSP00000405330	9606.ENSP00000268035	0	0	0	0	0	0.407	0.9	0.835	0.989
AKT1	HIF1A	4450372	4449842	9606.ENSP00000451828	9606.ENSP00000437955	0	0	0	0	0	0.362	0.9	0.827	0.988
CDC42	SRC	4446990	4444215	9606.ENSP00000383118	9606.ENSP00000362680	0	0	0	0	0.066	0.16	0.9	0.864	0.988
CASP8	TLR3	4442125	4437339	9606.ENSP00000351273	9606.ENSP00000296795	0	0	0	0	0.062	0.752	0.9	0.561	0.988
FOS	STAT3	4438204	4435468	9606.ENSP00000306245	9606.ENSP00000264657	0	0	0	0	0	0.423	0.9	0.811	0.988
CEBPB	PPARG	4438125	4436745	9606.ENSP00000305422	9606.ENSP00000287820	0	0	0	0	0.062	0.31	0.9	0.836	0.988
SRC	CTNNB1	4444215	4441426	9606.ENSP00000362680	9606.ENSP00000344456	0	0	0	0	0.057	0.467	0.9	0.797	0.988
PIK3CD	PIK3R3	4444876	4435132	9606.ENSP00000366563	9606.ENSP00000262741	0	0	0	0	0.062	0.755	0.9	0.552	0.988
CASP8	MAPK1	4442125	4432880	9606.ENSP00000351273	9606.ENSP00000215832	0	0	0	0	0	0.482	0.9	0.778	0.987
FOS	MAPK3	4438204	4435180	9606.ENSP00000306245	9606.ENSP00000263025	0	0	0	0	0	0.264	0.9	0.847	0.987
HSPA4	STUB1	4437917	4433095	9606.ENSP00000302961	9606.ENSP00000219548	0	0	0	0	0.046	0.544	0.9	0.746	0.987
CASP8	TP53	4442125	4435880	9606.ENSP00000351273	9606.ENSP00000269305	0	0	0	0	0.098	0.328	0.8	0.908	0.987
IL6ST	STAT3	4445526	4435468	9606.ENSP00000370698	9606.ENSP00000264657	0	0	0	0	0.063	0.4	0.9	0.797	0.987
MAPK3	MAPK1	4435180	4432880	9606.ENSP00000263025	9606.ENSP00000215832	0	0	0.446	0.983	0	0.872	0.9	0.951	0.987
SP1	TP53	4440095	4435880	9606.ENSP00000329357	9606.ENSP00000269305	0	0	0	0	0.055	0.472	0.9	0.772	0.987
TNF	JUN	4448041	4443699	9606.ENSP00000398698	9606.ENSP00000360266	0	0	0	0	0	0	0.9	0.871	0.986
TP53	STAT3	4435880	4435468	9606.ENSP00000269305	9606.ENSP00000264657	0	0	0	0	0	0	0.9	0.87	0.986
STAT3	MAPK3	4435468	4435180	9606.ENSP00000264657	9606.ENSP00000263025	0	0	0	0	0.06	0.3	0.9	0.815	0.986
CALM3	CACNA1C	4436903	4435696	9606.ENSP00000291295	9606.ENSP00000266376	0	0	0	0	0.061	0.973	0	0.511	0.986
AKT1	PIK3CB	4450372	4436798	9606.ENSP00000451828	9606.ENSP00000289153	0	0	0	0	0.063	0.464	0.9	0.761	0.986
HIF1A	STAT3	4449842	4435468	9606.ENSP00000437955	9606.ENSP00000264657	0	0	0	0	0.061	0.434	0.9	0.781	0.986
TNF	CASP8	4448041	4442125	9606.ENSP00000398698	9606.ENSP00000351273	0	0	0	0	0.062	0.394	0.9	0.788	0.986
SMAD3	MAPK1	4440414	4432880	9606.ENSP00000332973	9606.ENSP00000215832	0	0	0	0	0.06	0.455	0.9	0.758	0.986
JUN	SMAD3	4443699	4440414	9606.ENSP00000360266	9606.ENSP00000332973	0	0	0	0	0	0.472	0.9	0.764	0.986
TP53	RB1	4435880	4435747	9606.ENSP00000269305	9606.ENSP00000267163	0	0	0	0	0.061	0.379	0.9	0.789	0.986
JUN	NR3C1	4443699	4433539	9606.ENSP00000360266	9606.ENSP00000231509	0	0	0	0	0	0.472	0.9	0.739	0.985
TP53	MAPK1	4435880	4432880	9606.ENSP00000269305	9606.ENSP00000215832	0	0	0	0	0.055	0.532	0.8	0.859	0.985
CALM1	NOS3	4441930	4437409	9606.ENSP00000349467	9606.ENSP00000297494	0	0	0	0	0	0.865	0.8	0.5	0.985
ESR1	NOS3	4448358	4437409	9606.ENSP00000405330	9606.ENSP00000297494	0	0	0	0	0	0.472	0.9	0.749	0.985
NR1H3	ABCA1	4451232	4444444	9606.ENSP00000477707	9606.ENSP00000363868	0	0	0	0	0.062	0.125	0.9	0.845	0.985
SERPINF2	PLAT	4439481	4433132	9606.ENSP00000321853	9606.ENSP00000220809	0	0	0	0	0	0.129	0.9	0.836	0.984
JUNB	JUND	4437951	4434256	9606.ENSP00000303315	9606.ENSP00000252818	0	0	0	0.883	0.152	0.816	0.9	0.931	0.984
AR	CTNNB1	4444436	4441426	9606.ENSP00000363822	9606.ENSP00000344456	0	0	0	0	0	0.385	0.9	0.775	0.984
TNF	NOS2	4448041	4439909	9606.ENSP00000398698	9606.ENSP00000327251	0	0	0	0	0.063	0	0.9	0.844	0.984
BCL2	TP53	4446777	4435880	9606.ENSP00000381185	9606.ENSP00000269305	0	0	0	0	0.05	0.525	0.9	0.705	0.984
IGF1R	PIK3CA	4435797	4435346	9606.ENSP00000268035	9606.ENSP00000263967	0	0	0	0	0.062	0.124	0.9	0.837	0.984
TNF	MAPK14	4448041	4433482	9606.ENSP00000398698	9606.ENSP00000229795	0	0	0	0	0	0	0.9	0.85	0.984
SMARCA4	CTNNB1	4447900	4441426	9606.ENSP00000395654	9606.ENSP00000344456	0	0	0	0	0.086	0.525	0.9	0.653	0.983
SMAD3	TGFB1	4440414	4433189	9606.ENSP00000332973	9606.ENSP00000221930	0	0	0	0	0.066	0.081	0.9	0.831	0.983
CTNNB1	CASP3	4441426	4438651	9606.ENSP00000344456	9606.ENSP00000311032	0	0	0	0	0.062	0.542	0.9	0.648	0.982
ESR1	FOS	4448358	4438204	9606.ENSP00000405330	9606.ENSP00000306245	0	0	0	0	0	0.475	0.9	0.688	0.982
TNF	PPARG	4448041	4436745	9606.ENSP00000398698	9606.ENSP00000287820	0	0	0	0	0	0	0.9	0.827	0.982
SHC1	IGF1R	4448165	4435797	9606.ENSP00000401303	9606.ENSP00000268035	0	0	0	0	0	0.52	0.9	0.672	0.982
AR	KAT5	4444436	4441035	9606.ENSP00000363822	9606.ENSP00000340330	0	0	0	0	0	0.379	0.9	0.746	0.982
GRIN2B	BDNF	4451206	4448727	9606.ENSP00000477455	9606.ENSP00000414303	0	0	0	0	0.062	0	0.9	0.829	0.982
JUN	JUNB	4443699	4437951	9606.ENSP00000360266	9606.ENSP00000303315	0	0	0	0.901	0.336	0.728	0.9	0.894	0.982
PTEN	PIK3CB	4443848	4436798	9606.ENSP00000361021	9606.ENSP00000289153	0	0	0	0	0.065	0.186	0.9	0.8	0.982
ESR1	SP1	4448358	4440095	9606.ENSP00000405330	9606.ENSP00000329357	0	0	0	0	0.062	0.424	0.9	0.712	0.982
JUN	CTNNB1	4443699	4441426	9606.ENSP00000360266	9606.ENSP00000344456	0	0	0	0	0	0.265	0.9	0.769	0.981
EDN1	AGT	4445200	4442719	9606.ENSP00000368683	9606.ENSP00000355627	0	0	0	0	0	0	0.9	0.826	0.981
PTGS1	PTGIS	4442503	4433877	9606.ENSP00000354612	9606.ENSP00000244043	0	0	0	0	0.05	0.379	0.9	0.724	0.981
AKT1	CAV1	4450372	4440933	9606.ENSP00000451828	9606.ENSP00000339191	0	0	0	0	0	0.057	0.9	0.815	0.981
TNF	FOS	4448041	4438204	9606.ENSP00000398698	9606.ENSP00000306245	0	0	0	0	0	0	0.9	0.819	0.981
SHC1	MAPK1	4448165	4432880	9606.ENSP00000401303	9606.ENSP00000215832	0	0	0	0	0.065	0.406	0.9	0.694	0.98
AKT1	SHC1	4450372	4448165	9606.ENSP00000451828	9606.ENSP00000401303	0	0	0	0	0.067	0.26	0.9	0.746	0.98
RELA	JUN	4447098	4443699	9606.ENSP00000384273	9606.ENSP00000360266	0	0	0	0	0.069	0.457	0.9	0.667	0.98
CASP8	MAPK3	4442125	4435180	9606.ENSP00000351273	9606.ENSP00000263025	0	0	0	0	0	0.482	0.9	0.646	0.98
STAT3	IL4	4435468	4433533	9606.ENSP00000264657	9606.ENSP00000231449	0	0	0	0	0	0	0.9	0.817	0.98
NOS1	CALM1	4451263	4441930	9606.ENSP00000477999	9606.ENSP00000349467	0	0	0	0	0	0.792	0.8	0.564	0.98
CEBPB	MAPK1	4438125	4432880	9606.ENSP00000305422	9606.ENSP00000215832	0	0	0	0	0	0.472	0.9	0.651	0.98
AKT1	PAK1	4450372	4436295	9606.ENSP00000451828	9606.ENSP00000278568	0	0	0.386	0.646	0.063	0.723	0.9	0.622	0.98
PTGS2	STAT3	4442894	4435468	9606.ENSP00000356438	9606.ENSP00000264657	0	0	0	0	0	0	0.9	0.81	0.98
TP53	NGFR	4435880	4432715	9606.ENSP00000269305	9606.ENSP00000172229	0	0	0	0	0	0.379	0.9	0.709	0.98
AR	SIRT1	4444436	4432849	9606.ENSP00000363822	9606.ENSP00000212015	0	0	0	0	0	0.393	0.9	0.709	0.98
AKT1	EDN1	4450372	4445200	9606.ENSP00000451828	9606.ENSP00000368683	0	0	0	0	0.061	0	0.9	0.806	0.98
ESR1	MAPK3	4448358	4435180	9606.ENSP00000405330	9606.ENSP00000263025	0	0	0	0	0	0.399	0.9	0.678	0.979
CSF2	STAT3	4437349	4435468	9606.ENSP00000296871	9606.ENSP00000264657	0	0	0	0	0	0	0.9	0.805	0.979
TNF	ADAM17	4448041	4438549	9606.ENSP00000398698	9606.ENSP00000309968	0	0	0	0	0.061	0.379	0.9	0.692	0.979
SERPINE1	TGFB1	4433266	4433189	9606.ENSP00000223095	9606.ENSP00000221930	0	0	0	0	0.088	0	0.9	0.795	0.979
CALM2	CACNA1C	4436014	4435696	9606.ENSP00000272298	9606.ENSP00000266376	0	0	0	0	0.061	0.973	0	0.265	0.979
AKT1	PIK3CG	4450372	4442215	9606.ENSP00000451828	9606.ENSP00000352121	0	0	0	0	0.063	0.174	0.9	0.771	0.979
ESR1	JUN	4448358	4443699	9606.ENSP00000405330	9606.ENSP00000360266	0	0	0	0	0	0.472	0.9	0.646	0.979
PIK3CG	PIK3R3	4442215	4435132	9606.ENSP00000352121	9606.ENSP00000262741	0	0	0	0	0.061	0.446	0.9	0.63	0.978
FOS	MAPK14	4438204	4433482	9606.ENSP00000306245	9606.ENSP00000229795	0	0	0	0	0	0.264	0.9	0.733	0.978
IL1B	MAPK14	4435241	4433482	9606.ENSP00000263341	9606.ENSP00000229795	0	0	0	0	0	0	0.9	0.79	0.978
HSPA1A	TP53	4444600	4435880	9606.ENSP00000364802	9606.ENSP00000269305	0	0	0	0	0	0.535	0.9	0.572	0.978
AKT1	SRC	4450372	4444215	9606.ENSP00000451828	9606.ENSP00000362680	0	0	0.391	0.562	0.097	0.546	0.9	0.96	0.978
HIF1A	TP53	4449842	4435880	9606.ENSP00000437955	9606.ENSP00000269305	0	0	0	0	0	0.379	0.9	0.674	0.977
CTNNB1	SMAD4	4441426	4441161	9606.ENSP00000344456	9606.ENSP00000341551	0	0	0	0	0.063	0.336	0.9	0.687	0.977
AR	SMAD3	4444436	4440414	9606.ENSP00000363822	9606.ENSP00000332973	0	0	0	0	0	0.393	0.9	0.655	0.977
ESR1	PIK3CA	4448358	4435346	9606.ENSP00000405330	9606.ENSP00000263967	0	0	0	0	0	0.379	0.9	0.669	0.977
IL1B	NFKB1	4435241	4433374	9606.ENSP00000263341	9606.ENSP00000226574	0	0	0	0	0.131	0	0.9	0.747	0.976
CDC42	PIK3CA	4446990	4435346	9606.ENSP00000383118	9606.ENSP00000263967	0	0	0	0	0.062	0.683	0.9	0.296	0.976
TNF	STAT3	4448041	4435468	9606.ENSP00000398698	9606.ENSP00000264657	0	0	0	0	0	0	0.9	0.774	0.976
HSPA1A	AR	4444600	4444436	9606.ENSP00000364802	9606.ENSP00000363822	0	0	0	0	0	0.423	0.9	0.61	0.975
SGK1	SCNN1A	4442972	4442340	9606.ENSP00000356832	9606.ENSP00000353292	0	0	0	0	0	0	0.9	0.764	0.975
HSPB2	MAPK14	4437856	4433482	9606.ENSP00000302476	9606.ENSP00000229795	0	0	0	0	0	0.265	0.8	0.846	0.975
ABCB1	TP53	4451279	4435880	9606.ENSP00000478255	9606.ENSP00000269305	0	0	0	0	0	0	0.9	0.76	0.975
JUN	SP1	4443699	4440095	9606.ENSP00000360266	9606.ENSP00000329357	0	0	0	0	0	0.457	0.9	0.588	0.975
PPARG	SIRT1	4436745	4432849	9606.ENSP00000287820	9606.ENSP00000212015	0	0	0	0	0	0.263	0.8	0.844	0.975
ALOX5	PTGS2	4444382	4442894	9606.ENSP00000363512	9606.ENSP00000356438	0	0	0	0	0.08	0	0.9	0.758	0.975
CEBPB	STAT3	4438125	4435468	9606.ENSP00000305422	9606.ENSP00000264657	0	0	0	0	0.095	0.41	0.9	0.581	0.974
ESR1	SMAD4	4448358	4441161	9606.ENSP00000405330	9606.ENSP00000341551	0	0	0	0	0	0.329	0.9	0.653	0.974
SRC	NOS2	4444215	4439909	9606.ENSP00000362680	9606.ENSP00000327251	0	0	0	0	0.064	0.394	0.9	0.6	0.974
CTNNB1	PIK3CA	4441426	4435346	9606.ENSP00000344456	9606.ENSP00000263967	0	0	0	0	0.082	0.157	0.9	0.71	0.974
PTGS2	IL1B	4442894	4435241	9606.ENSP00000356438	9606.ENSP00000263341	0	0	0	0	0.561	0	0	0.943	0.974
PPARG	TP53	4436745	4435880	9606.ENSP00000287820	9606.ENSP00000269305	0	0	0	0	0	0	0.9	0.751	0.974
ESR1	SMAD3	4448358	4440414	9606.ENSP00000405330	9606.ENSP00000332973	0	0	0	0	0	0.329	0.9	0.654	0.974
PTGS2	PTGIS	4442894	4433877	9606.ENSP00000356438	9606.ENSP00000244043	0	0	0	0	0.061	0.379	0.9	0.609	0.974
JUN	SMAD4	4443699	4441161	9606.ENSP00000360266	9606.ENSP00000341551	0	0	0	0	0	0.345	0.9	0.636	0.974
CDC42	ROCK2	4446990	4439164	9606.ENSP00000383118	9606.ENSP00000317985	0	0	0	0	0.062	0.262	0.9	0.671	0.974
CTNNB1	IGF1R	4441426	4435797	9606.ENSP00000344456	9606.ENSP00000268035	0	0	0	0	0.061	0.524	0.9	0.482	0.973
ALOX5	PTGS1	4444382	4442503	9606.ENSP00000363512	9606.ENSP00000354612	0	0	0	0	0.095	0	0.9	0.728	0.973
PRKCD	TP53	4446312	4435880	9606.ENSP00000378217	9606.ENSP00000269305	0	0	0	0	0	0.379	0.9	0.608	0.973
SGK1	SCNN1G	4442972	4437627	9606.ENSP00000356832	9606.ENSP00000300061	0	0	0	0	0	0	0.9	0.734	0.972
NOS2	CALM3	4439909	4436903	9606.ENSP00000327251	9606.ENSP00000291295	0	0	0	0	0	0.956	0	0.384	0.972
IL10	IL4	4448642	4433533	9606.ENSP00000412237	9606.ENSP00000231449	0	0	0	0	0	0	0	0.972	0.972
FOS	NR3C1	4438204	4433539	9606.ENSP00000306245	9606.ENSP00000231509	0	0	0	0	0.055	0.299	0.9	0.634	0.972
ALOX15	IL4	4450608	4433533	9606.ENSP00000458832	9606.ENSP00000231449	0	0	0	0	0	0	0.9	0.734	0.972
SHC1	MAPK3	4448165	4435180	9606.ENSP00000401303	9606.ENSP00000263025	0	0	0	0	0.062	0.084	0.9	0.716	0.972
TP53	NR3C1	4435880	4433539	9606.ENSP00000269305	9606.ENSP00000231509	0	0	0	0	0	0.379	0.9	0.572	0.971
ESR1	MAPK1	4448358	4432880	9606.ENSP00000405330	9606.ENSP00000215832	0	0	0	0	0	0.399	0.9	0.57	0.971
SHC1	PTK2B	4448165	4446690	9606.ENSP00000401303	9606.ENSP00000380638	0	0	0	0	0	0.379	0.9	0.584	0.971
JUN	CEBPB	4443699	4438125	9606.ENSP00000360266	9606.ENSP00000305422	0	0	0	0	0.145	0.128	0.9	0.665	0.971
EDN1	SRC	4445200	4444215	9606.ENSP00000368683	9606.ENSP00000362680	0	0	0	0	0.06	0	0.9	0.722	0.971
STAT3	MAPK14	4435468	4433482	9606.ENSP00000264657	9606.ENSP00000229795	0	0	0	0	0.06	0.05	0.9	0.722	0.971
GRIN1	GRIN3A	4443769	4442616	9606.ENSP00000360608	9606.ENSP00000355155	0	0	0	0.662	0.098	0.594	0.9	0.815	0.971
PDE1A	PDE1C	4448547	4446517	9606.ENSP00000410309	9606.ENSP00000379496	0	0	0	0.969	0.14	0.68	0.9	0.866	0.97
SHC1	SRC	4448165	4444215	9606.ENSP00000401303	9606.ENSP00000362680	0	0	0	0.552	0.052	0.52	0.9	0.922	0.97
EDN1	MAPK1	4445200	4432880	9606.ENSP00000368683	9606.ENSP00000215832	0	0	0	0	0	0	0.9	0.713	0.97
ITGB3	SRC	4450406	4444215	9606.ENSP00000452786	9606.ENSP00000362680	0	0	0	0	0.09	0.472	0.9	0.461	0.97
SHC1	PTEN	4448165	4443848	9606.ENSP00000401303	9606.ENSP00000361021	0	0	0	0	0	0	0.9	0.718	0.97
CEBPB	MAPK3	4438125	4435180	9606.ENSP00000305422	9606.ENSP00000263025	0	0	0	0	0	0.455	0.9	0.509	0.97
HIF1A	JUN	4449842	4443699	9606.ENSP00000437955	9606.ENSP00000360266	0	0	0	0	0	0.379	0.9	0.561	0.97
SRC	JUN	4444215	4443699	9606.ENSP00000362680	9606.ENSP00000360266	0	0	0	0	0.065	0.079	0.8	0.85	0.97
FOS	TP53	4438204	4435880	9606.ENSP00000306245	9606.ENSP00000269305	0	0	0	0	0	0	0.9	0.706	0.969
TGFB2	SMAD3	4442765	4440414	9606.ENSP00000355896	9606.ENSP00000332973	0	0	0	0	0.085	0.081	0.9	0.676	0.969
STAT3	POU5F1	4435468	4434735	9606.ENSP00000264657	9606.ENSP00000259915	0	0	0	0	0.062	0.065	0.9	0.694	0.969
PIK3CD	PTEN	4444876	4443848	9606.ENSP00000366563	9606.ENSP00000361021	0	0	0	0	0.065	0.186	0.9	0.65	0.969
AGTR1	EDN1	4449040	4445200	9606.ENSP00000419422	9606.ENSP00000368683	0	0	0	0	0	0.157	0.9	0.669	0.969
AKT1	CASP3	4450372	4438651	9606.ENSP00000451828	9606.ENSP00000311032	0	0	0	0	0.055	0.393	0	0.95	0.969
HIF1A	NOS3	4449842	4437409	9606.ENSP00000437955	9606.ENSP00000297494	0	0	0	0	0	0	0.9	0.706	0.969
SMAD3	SERPINE1	4440414	4433266	9606.ENSP00000332973	9606.ENSP00000223095	0	0	0	0	0.065	0	0.9	0.703	0.969
RELA	SIRT1	4447098	4432849	9606.ENSP00000384273	9606.ENSP00000212015	0	0	0	0	0	0.472	0.8	0.737	0.969
TNF	NFKB1	4448041	4433374	9606.ENSP00000398698	9606.ENSP00000226574	0	0	0	0	0.108	0	0.9	0.672	0.968
CDC42	PIK3CB	4446990	4436798	9606.ENSP00000383118	9606.ENSP00000289153	0	0	0	0	0.061	0.809	0.8	0.224	0.968
VDR	SMAD3	4450226	4440414	9606.ENSP00000447173	9606.ENSP00000332973	0	0	0	0	0	0.491	0.9	0.438	0.968
RELA	FOS	4447098	4438204	9606.ENSP00000384273	9606.ENSP00000306245	0	0	0	0	0	0.379	0.9	0.539	0.968
HMGB1	TP53	4441512	4435880	9606.ENSP00000345347	9606.ENSP00000269305	0	0	0	0	0.063	0.904	0	0.672	0.968
SMARCA4	ACTB	4447900	4441991	9606.ENSP00000395654	9606.ENSP00000349960	0	0	0	0	0.061	0.544	0.9	0.343	0.968
FOS	PPARG	4438204	4436745	9606.ENSP00000306245	9606.ENSP00000287820	0	0	0	0	0	0.098	0.9	0.683	0.968
HMGB1	MAPK1	4441512	4432880	9606.ENSP00000345347	9606.ENSP00000215832	0	0	0	0	0.061	0.462	0.9	0.443	0.968
PDE1C	PDE1B	4446517	4433839	9606.ENSP00000379496	9606.ENSP00000243052	0	0	0	0.959	0.061	0.68	0.9	0.843	0.968
DBH	COMT	4446100	4442480	9606.ENSP00000376776	9606.ENSP00000354511	0	0	0	0	0	0	0.9	0.695	0.968
BDNF	STAT3	4448727	4435468	9606.ENSP00000414303	9606.ENSP00000264657	0	0	0	0	0	0	0.9	0.687	0.967
ESR2	NOS3	4441379	4437409	9606.ENSP00000343925	9606.ENSP00000297494	0	0	0	0	0	0.091	0.9	0.671	0.967
CASP3	RB1	4438651	4435747	9606.ENSP00000311032	9606.ENSP00000267163	0	0	0	0	0	0.379	0.9	0.519	0.967
SP1	MAPK3	4440095	4435180	9606.ENSP00000329357	9606.ENSP00000263025	0	0	0	0	0	0.443	0.9	0.471	0.967
GRIN1	CALM1	4443769	4441930	9606.ENSP00000360608	9606.ENSP00000349467	0	0	0	0	0.169	0.865	0.6	0.343	0.966
CALCA	CRH	4440295	4436231	9606.ENSP00000331746	9606.ENSP00000276571	0	0	0	0	0.088	0	0.9	0.666	0.966
EDN1	MAPK14	4445200	4433482	9606.ENSP00000368683	9606.ENSP00000229795	0	0	0	0	0	0	0.9	0.679	0.966
CASP8	IL1B	4442125	4435241	9606.ENSP00000351273	9606.ENSP00000263341	0	0	0	0	0.063	0.268	0.9	0.568	0.966
CDC42	ACTB	4446990	4441991	9606.ENSP00000383118	9606.ENSP00000349960	0	0	0	0	0.339	0.084	0.9	0.51	0.966
PPARA	FADS1	4447242	4439505	9606.ENSP00000385523	9606.ENSP00000322229	0	0	0	0	0	0.05	0.9	0.671	0.966
TP53	MAPK3	4435880	4435180	9606.ENSP00000269305	9606.ENSP00000263025	0	0	0	0	0.062	0.403	0.8	0.737	0.966
SMAD3	MAPK3	4440414	4435180	9606.ENSP00000332973	9606.ENSP00000263025	0	0	0	0	0.06	0.159	0.9	0.629	0.966
SP1	MAPK1	4440095	4432880	9606.ENSP00000329357	9606.ENSP00000215832	0	0	0	0	0	0.443	0.9	0.441	0.966
NOS2	CALM2	4439909	4436014	9606.ENSP00000327251	9606.ENSP00000272298	0	0	0	0	0	0.956	0	0.241	0.965
SGK1	SCNN1B	4442972	4441549	9606.ENSP00000356832	9606.ENSP00000345751	0	0	0	0	0	0.305	0.9	0.538	0.965
AVP	EDN1	4445364	4445200	9606.ENSP00000369647	9606.ENSP00000368683	0	0	0	0	0	0	0.9	0.667	0.965
PTEN	PIK3R3	4443848	4435132	9606.ENSP00000361021	9606.ENSP00000262741	0	0	0	0	0.063	0.185	0.9	0.602	0.965
ESR1	STUB1	4448358	4433095	9606.ENSP00000405330	9606.ENSP00000219548	0	0	0	0	0	0.454	0.9	0.425	0.965
ITGB3	PTK2B	4450406	4446690	9606.ENSP00000452786	9606.ENSP00000380638	0	0	0	0	0.1	0.523	0.9	0.293	0.965
STAT3	IL1B	4435468	4435241	9606.ENSP00000264657	9606.ENSP00000263341	0	0	0	0	0	0	0.9	0.669	0.965
SHC1	CAV1	4448165	4440933	9606.ENSP00000401303	9606.ENSP00000339191	0	0	0	0	0.097	0	0.9	0.643	0.965
TNF	CAV1	4448041	4440933	9606.ENSP00000398698	9606.ENSP00000339191	0	0	0	0	0	0.348	0.9	0.507	0.965
AR	CASP8	4444436	4442125	9606.ENSP00000363822	9606.ENSP00000351273	0	0	0	0	0	0.472	0.9	0.399	0.965
SRC	ESR2	4444215	4441379	9606.ENSP00000362680	9606.ENSP00000343925	0	0	0	0	0	0.407	0.9	0.459	0.965
GRIN1	GRIA2	4443769	4437302	9606.ENSP00000360608	9606.ENSP00000296526	0	0	0	0.657	0.377	0.269	0.9	0.831	0.964
HIF1A	MAPK3	4449842	4435180	9606.ENSP00000437955	9606.ENSP00000263025	0	0	0	0	0	0.379	0.8	0.737	0.964
STAT3	TGFB1	4435468	4433189	9606.ENSP00000264657	9606.ENSP00000221930	0	0	0	0	0	0.269	0.9	0.547	0.964
SMARCA4	NR3C1	4447900	4433539	9606.ENSP00000395654	9606.ENSP00000231509	0	0	0	0	0	0.404	0.9	0.448	0.964
EDN1	MAPK3	4445200	4435180	9606.ENSP00000368683	9606.ENSP00000263025	0	0	0	0	0	0	0.9	0.664	0.964
CASP3	RIPK1	4438651	4434726	9606.ENSP00000311032	9606.ENSP00000259808	0	0	0	0	0	0.064	0.9	0.648	0.964
SMAD3	FOS	4440414	4438204	9606.ENSP00000332973	9606.ENSP00000306245	0	0	0	0	0	0.379	0.9	0.479	0.964
RELA	CEBPB	4447098	4438125	9606.ENSP00000384273	9606.ENSP00000305422	0	0	0	0	0.096	0.379	0.9	0.448	0.964
PTK2B	SRC	4446690	4444215	9606.ENSP00000380638	9606.ENSP00000362680	0	0	0	0.711	0.062	0.521	0.9	0.928	0.964
SRC	MAPK3	4444215	4435180	9606.ENSP00000362680	9606.ENSP00000263025	0	0	0.308	0.611	0.061	0.416	0.9	0.867	0.964
SHC1	MAPK14	4448165	4433482	9606.ENSP00000401303	9606.ENSP00000229795	0	0	0	0	0.061	0.429	0.9	0.408	0.964
RELA	NR3C1	4447098	4433539	9606.ENSP00000384273	9606.ENSP00000231509	0	0	0	0	0	0.393	0.9	0.443	0.963
CEBPB	NFKB1	4438125	4433374	9606.ENSP00000305422	9606.ENSP00000226574	0	0	0	0	0.087	0.384	0.9	0.434	0.963
ADRA1A	TAC1	4445417	4439413	9606.ENSP00000369960	9606.ENSP00000321106	0	0	0	0	0	0	0.9	0.647	0.963
JUN	IL1B	4443699	4435241	9606.ENSP00000360266	9606.ENSP00000263341	0	0	0	0	0.052	0	0.8	0.82	0.963
RELA	SP1	4447098	4440095	9606.ENSP00000384273	9606.ENSP00000329357	0	0	0	0	0.048	0.457	0.9	0.377	0.963
HSPA1A	NR3C1	4444600	4433539	9606.ENSP00000364802	9606.ENSP00000231509	0	0	0	0	0	0.423	0.9	0.425	0.963
AR	RB1	4444436	4435747	9606.ENSP00000363822	9606.ENSP00000267163	0	0	0	0	0	0.388	0.9	0.444	0.963
SRC	MAPK1	4444215	4432880	9606.ENSP00000362680	9606.ENSP00000215832	0	0	0.311	0.626	0.061	0.416	0.9	0.871	0.963
RELA	PPARG	4447098	4436745	9606.ENSP00000384273	9606.ENSP00000287820	0	0	0	0	0	0.472	0.9	0.348	0.962
IL4	MAPK14	4433533	4433482	9606.ENSP00000231449	9606.ENSP00000229795	0	0	0	0	0	0	0.9	0.641	0.962
CDC42	CTNNB1	4446990	4441426	9606.ENSP00000383118	9606.ENSP00000344456	0	0	0	0	0.063	0.179	0.9	0.565	0.962
AGT	MAPK3	4442719	4435180	9606.ENSP00000355627	9606.ENSP00000263025	0	0	0	0	0	0	0.9	0.641	0.962
SMAD3	SP1	4440414	4440095	9606.ENSP00000332973	9606.ENSP00000329357	0	0	0	0	0.059	0.408	0.9	0.404	0.962
SMAD4	SERPINE1	4441161	4433266	9606.ENSP00000341551	9606.ENSP00000223095	0	0	0	0	0	0	0.9	0.642	0.962
ESR1	CEBPB	4448358	4438125	9606.ENSP00000405330	9606.ENSP00000305422	0	0	0	0	0.049	0.393	0.9	0.421	0.962
RIPK1	NFKB1	4434726	4433374	9606.ENSP00000259808	9606.ENSP00000226574	0	0	0	0	0.088	0.41	0.9	0.383	0.962
DBH	TH	4446100	4445511	9606.ENSP00000376776	9606.ENSP00000370571	0	0	0	0	0.063	0	0	0.962	0.962
SP1	MAPK14	4440095	4433482	9606.ENSP00000329357	9606.ENSP00000229795	0	0	0	0	0	0.443	0.9	0.376	0.962
HIF1A	SMAD3	4449842	4440414	9606.ENSP00000437955	9606.ENSP00000332973	0	0	0	0	0	0.472	0.9	0.351	0.962
PRKCD	MAPK3	4446312	4435180	9606.ENSP00000378217	9606.ENSP00000263025	0	0	0	0.582	0.062	0.522	0.9	0.572	0.962
VDR	BAZ1B	4450226	4441256	9606.ENSP00000447173	9606.ENSP00000342434	0	0	0	0	0	0.406	0.9	0.415	0.962
SMAD4	TGFB1	4441161	4433189	9606.ENSP00000341551	9606.ENSP00000221930	0	0	0	0	0	0.081	0.9	0.621	0.962
AKT1	NFKB1	4450372	4433374	9606.ENSP00000451828	9606.ENSP00000226574	0	0	0	0	0.065	0.261	0.9	0.525	0.962
ESR1	MAPK14	4448358	4433482	9606.ENSP00000405330	9606.ENSP00000229795	0	0	0	0	0	0.399	0.9	0.421	0.962
NR3C1	STUB1	4433539	4433095	9606.ENSP00000231509	9606.ENSP00000219548	0	0	0	0	0	0.432	0.9	0.376	0.961
PRKCD	MAPK1	4446312	4432880	9606.ENSP00000378217	9606.ENSP00000215832	0	0	0	0.589	0.062	0.522	0.9	0.534	0.961
LTA	TNF	4448275	4448041	9606.ENSP00000403495	9606.ENSP00000398698	0	0	0	0.759	0.282	0.379	0.9	0.874	0.961
ESR1	SHC1	4448358	4448165	9606.ENSP00000405330	9606.ENSP00000401303	0	0	0	0	0	0.379	0.9	0.43	0.961
NR3C1	MAPK1	4433539	4432880	9606.ENSP00000231509	9606.ENSP00000215832	0	0	0	0	0	0.399	0.9	0.413	0.961
AGT	F2	4442719	4438421	9606.ENSP00000355627	9606.ENSP00000308541	0	0	0	0	0.377	0.129	0.9	0.38	0.961
ITGB3	AKT1	4450406	4450372	9606.ENSP00000452786	9606.ENSP00000451828	0	0	0	0	0.08	0.34	0.9	0.425	0.96
PTEN	STUB1	4443848	4433095	9606.ENSP00000361021	9606.ENSP00000219548	0	0	0	0	0.092	0.379	0.9	0.389	0.96
SRC	PIK3CA	4444215	4435346	9606.ENSP00000362680	9606.ENSP00000263967	0	0	0	0	0.058	0.124	0.9	0.578	0.96
JUN	RB1	4443699	4435747	9606.ENSP00000360266	9606.ENSP00000267163	0	0	0	0	0	0.379	0.9	0.417	0.96
AR	SMAD4	4444436	4441161	9606.ENSP00000363822	9606.ENSP00000341551	0	0	0	0	0	0.393	0.9	0.4	0.96
PC	GOT1	4446208	4443556	9606.ENSP00000377532	9606.ENSP00000359539	0	0	0	0	0.09	0.379	0.8	0.69	0.96
PAK1	MAPK14	4436295	4433482	9606.ENSP00000278568	9606.ENSP00000229795	0	0	0.371	0.644	0.055	0.502	0.9	0.322	0.959
SCN5A	CALM1	4448544	4441930	9606.ENSP00000410257	9606.ENSP00000349467	0	0	0	0	0.061	0.916	0	0.517	0.959
SRC	F2	4444215	4438421	9606.ENSP00000362680	9606.ENSP00000308541	0	0	0	0	0	0.05	0.9	0.608	0.959
ACE	REN	4436887	4436004	9606.ENSP00000290866	9606.ENSP00000272190	0	0	0	0	0	0	0	0.959	0.959
SHC1	NGFR	4448165	4432715	9606.ENSP00000401303	9606.ENSP00000172229	0	0	0	0	0	0.379	0.9	0.399	0.959
CDC42	MAPK14	4446990	4433482	9606.ENSP00000383118	9606.ENSP00000229795	0	0	0	0	0.061	0.185	0.9	0.537	0.959
ALOX15	PTGS2	4450608	4442894	9606.ENSP00000458832	9606.ENSP00000356438	0	0	0	0	0.061	0	0.9	0.601	0.959
CTNNB1	TGFB1	4441426	4433189	9606.ENSP00000344456	9606.ENSP00000221930	0	0	0	0	0	0.084	0.9	0.587	0.958
PPARG	NFKB1	4436745	4433374	9606.ENSP00000287820	9606.ENSP00000226574	0	0	0	0	0.049	0.379	0.9	0.378	0.958
SCN5A	CALM3	4448544	4436903	9606.ENSP00000410257	9606.ENSP00000291295	0	0	0	0	0.061	0.916	0	0.509	0.958
PRKCD	SRC	4446312	4444215	9606.ENSP00000378217	9606.ENSP00000362680	0	0	0	0.566	0.09	0.406	0.9	0.699	0.958
ALOX15	PTGS1	4450608	4442503	9606.ENSP00000458832	9606.ENSP00000354612	0	0	0	0	0.061	0	0.9	0.594	0.958
SMAD4	SP1	4441161	4440095	9606.ENSP00000341551	9606.ENSP00000329357	0	0	0	0	0.062	0.408	0.9	0.348	0.958
AKT1	PIK3R3	4450372	4435132	9606.ENSP00000451828	9606.ENSP00000262741	0	0	0	0	0.062	0.085	0.9	0.576	0.958
SMAD3	JUNB	4440414	4437951	9606.ENSP00000332973	9606.ENSP00000303315	0	0	0	0	0	0.402	0.9	0.358	0.958
ADRA1A	EDN1	4445417	4445200	9606.ENSP00000369960	9606.ENSP00000368683	0	0	0	0	0	0.157	0.9	0.544	0.958
EDN1	ADRB2	4445200	4438121	9606.ENSP00000368683	9606.ENSP00000305372	0	0	0	0	0	0.157	0.9	0.546	0.958
HIF1A	SP1	4449842	4440095	9606.ENSP00000437955	9606.ENSP00000329357	0	0	0	0	0	0.394	0.9	0.355	0.957
AVP	AGT	4445364	4442719	9606.ENSP00000369647	9606.ENSP00000355627	0	0	0	0	0.083	0	0.9	0.571	0.957
NR3C1	NFKB1	4433539	4433374	9606.ENSP00000231509	9606.ENSP00000226574	0	0	0	0	0.064	0.379	0.9	0.348	0.957
SMARCA4	HMGB1	4447900	4441512	9606.ENSP00000395654	9606.ENSP00000345347	0	0	0	0	0.089	0.508	0.9	0.168	0.957
CALM1	CALM2	4441930	4436014	9606.ENSP00000349467	9606.ENSP00000272298	0	0	0.449	0.985	0.111	0.953	0	0.549	0.957
SRC	PIK3R3	4444215	4435132	9606.ENSP00000362680	9606.ENSP00000262741	0	0	0	0.556	0	0.535	0.9	0.315	0.957
F2	PLAT	4438421	4433132	9606.ENSP00000308541	9606.ENSP00000220809	0	0	0.395	0.642	0	0.379	0.9	0.706	0.957
SMAD3	NR3C1	4440414	4433539	9606.ENSP00000332973	9606.ENSP00000231509	0	0	0	0	0	0.393	0.9	0.348	0.957
SCNN1B	SCNN1G	4441549	4437627	9606.ENSP00000345751	9606.ENSP00000300061	0	0	0	0.868	0.221	0.432	0.9	0.943	0.957
PPARA	ABCA1	4447242	4444444	9606.ENSP00000385523	9606.ENSP00000363868	0	0	0	0	0.061	0.076	0.9	0.57	0.957
PPARA	MAPK3	4447242	4435180	9606.ENSP00000385523	9606.ENSP00000263025	0	0	0	0	0	0.399	0.9	0.342	0.957
PRKCD	STAT3	4446312	4435468	9606.ENSP00000378217	9606.ENSP00000264657	0	0	0	0	0.061	0.394	0.9	0.321	0.956
SMAD3	CEBPB	4440414	4438125	9606.ENSP00000332973	9606.ENSP00000305422	0	0	0	0	0.065	0.379	0.9	0.34	0.956
SP1	RB1	4440095	4435747	9606.ENSP00000329357	9606.ENSP00000267163	0	0	0	0	0	0.433	0.9	0.297	0.956
JUN	NOS2	4443699	4439909	9606.ENSP00000360266	9606.ENSP00000327251	0	0	0	0	0	0	0.9	0.584	0.956
GRIN2B	GRIA2	4451206	4437302	9606.ENSP00000477455	9606.ENSP00000296526	0	0	0	0.609	0.284	0.143	0.9	0.891	0.956
EDN1	AGTR2	4445200	4443835	9606.ENSP00000368683	9606.ENSP00000360973	0	0	0	0	0.062	0.157	0.9	0.518	0.956
EDN1	TAC1	4445200	4439413	9606.ENSP00000368683	9606.ENSP00000321106	0	0	0	0	0	0	0.9	0.581	0.956
TNF	CSF2	4448041	4437349	9606.ENSP00000398698	9606.ENSP00000296871	0	0	0	0	0.131	0	0	0.951	0.956
TGFB2	SMAD4	4442765	4441161	9606.ENSP00000355896	9606.ENSP00000341551	0	0	0	0	0	0.081	0.9	0.564	0.956
JUN	PPARG	4443699	4436745	9606.ENSP00000360266	9606.ENSP00000287820	0	0	0	0	0	0.144	0.9	0.533	0.956
AVP	CALCA	4445364	4440295	9606.ENSP00000369647	9606.ENSP00000331746	0	0	0	0	0.062	0	0.9	0.573	0.956
JUN	ACTB	4443699	4441991	9606.ENSP00000360266	9606.ENSP00000349960	0	0	0	0	0	0.177	0.9	0.51	0.956
TLR7	TLR8	4445433	4438750	9606.ENSP00000370034	9606.ENSP00000312082	0	0	0	0.904	0.29	0.379	0.9	0.935	0.956
AKT1	RB1	4450372	4435747	9606.ENSP00000451828	9606.ENSP00000267163	0	0	0	0	0	0.08	0.9	0.558	0.955
EDN1	JUN	4445200	4443699	9606.ENSP00000368683	9606.ENSP00000360266	0	0	0	0	0.073	0	0.9	0.554	0.955
CALM1	CALM3	4441930	4436903	9606.ENSP00000349467	9606.ENSP00000291295	0	0	0.449	0.985	0.081	0.953	0	0.597	0.955
BDNF	PLG	4448727	4438461	9606.ENSP00000414303	9606.ENSP00000308938	0	0	0	0	0	0.102	0.9	0.547	0.955
AGTR1	REN	4449040	4436004	9606.ENSP00000419422	9606.ENSP00000272190	0	0	0	0	0.055	0	0	0.954	0.955
NOS2	STAT3	4439909	4435468	9606.ENSP00000327251	9606.ENSP00000264657	0	0	0	0	0	0	0.9	0.575	0.955
PLG	TGFB1	4438461	4433189	9606.ENSP00000308938	9606.ENSP00000221930	0	0	0	0	0	0	0.9	0.576	0.955
ESR1	USF1	4448358	4443013	9606.ENSP00000405330	9606.ENSP00000357000	0	0	0	0	0	0.392	0.9	0.326	0.955
TNF	NR3C1	4448041	4433539	9606.ENSP00000398698	9606.ENSP00000231509	0	0	0	0	0	0	0.9	0.577	0.955
CTNNB1	PAK1	4441426	4436295	9606.ENSP00000344456	9606.ENSP00000278568	0	0	0	0	0.064	0	0.9	0.56	0.955
JUN	IL4	4443699	4433533	9606.ENSP00000360266	9606.ENSP00000231449	0	0	0	0	0	0	0.9	0.559	0.954
RB1	MAPK1	4435747	4432880	9606.ENSP00000267163	9606.ENSP00000215832	0	0	0	0	0.061	0.379	0.9	0.317	0.954
CAV1	TGFB1	4440933	4433189	9606.ENSP00000339191	9606.ENSP00000221930	0	0	0	0	0	0	0.9	0.559	0.954
RELA	IL1B	4447098	4435241	9606.ENSP00000384273	9606.ENSP00000263341	0	0	0	0	0	0	0.9	0.559	0.954
SMARCA4	JUN	4447900	4443699	9606.ENSP00000395654	9606.ENSP00000360266	0	0	0	0	0	0.328	0.9	0.372	0.954
ACTB	KAT5	4441991	4441035	9606.ENSP00000349960	9606.ENSP00000340330	0	0	0	0	0.052	0.446	0.9	0.24	0.954
NFKB1	MAPK1	4433374	4432880	9606.ENSP00000226574	9606.ENSP00000215832	0	0	0	0	0.042	0.185	0.9	0.481	0.954
MAPK3	TGFB1	4435180	4433189	9606.ENSP00000263025	9606.ENSP00000221930	0	0	0	0	0.061	0.078	0.9	0.538	0.954
SCNN1A	SCNN1B	4442340	4441549	9606.ENSP00000353292	9606.ENSP00000345751	0	0	0	0.821	0.107	0.432	0.9	0.941	0.954
PRKCD	PIK3CA	4446312	4435346	9606.ENSP00000378217	9606.ENSP00000263967	0	0	0	0	0.064	0.459	0.9	0.198	0.954
CDC42	PIK3CD	4446990	4444876	9606.ENSP00000383118	9606.ENSP00000366563	0	0	0	0	0.061	0.734	0.8	0.199	0.954
SRC	IGF1R	4444215	4435797	9606.ENSP00000362680	9606.ENSP00000268035	0	0	0	0.711	0	0.408	0.9	0.835	0.953
HRH1	TAC1	4446629	4439413	9606.ENSP00000380247	9606.ENSP00000321106	0	0	0	0	0.061	0	0.9	0.54	0.953
SHC1	IL4	4448165	4433533	9606.ENSP00000401303	9606.ENSP00000231449	0	0	0	0	0.077	0	0.9	0.535	0.953
BDNF	SHC1	4448727	4448165	9606.ENSP00000414303	9606.ENSP00000401303	0	0	0	0	0	0	0.9	0.553	0.953
RB1	SIRT1	4435747	4432849	9606.ENSP00000267163	9606.ENSP00000212015	0	0	0	0	0.063	0.379	0.9	0.297	0.953
PRKCD	CASP3	4446312	4438651	9606.ENSP00000378217	9606.ENSP00000311032	0	0	0	0	0	0	0.9	0.556	0.953
ESR1	KAT5	4448358	4441035	9606.ENSP00000405330	9606.ENSP00000340330	0	0	0	0	0	0.379	0.9	0.31	0.953
CSF2	MAPK3	4437349	4435180	9606.ENSP00000296871	9606.ENSP00000263025	0	0	0	0	0	0	0.9	0.557	0.953
RELA	CASP8	4447098	4442125	9606.ENSP00000384273	9606.ENSP00000351273	0	0	0	0	0.061	0	0.9	0.542	0.953
ESR2	FOS	4441379	4438204	9606.ENSP00000343925	9606.ENSP00000306245	0	0	0	0	0	0.299	0.8	0.695	0.953
ADIPOQ	CRP	4447630	4434405	9606.ENSP00000389814	9606.ENSP00000255030	0	0	0	0	0	0	0	0.952	0.952
PRKCD	NOS3	4446312	4437409	9606.ENSP00000378217	9606.ENSP00000297494	0	0	0	0	0	0.08	0.9	0.528	0.952
RELA	MAPK1	4447098	4432880	9606.ENSP00000384273	9606.ENSP00000215832	0	0	0	0	0	0	0.9	0.541	0.952
JUN	NOS3	4443699	4437409	9606.ENSP00000360266	9606.ENSP00000297494	0	0	0	0	0	0	0.9	0.542	0.952
AVP	TAC1	4445364	4439413	9606.ENSP00000369647	9606.ENSP00000321106	0	0	0	0	0.063	0	0.9	0.531	0.952
CSF2	MAPK1	4437349	4432880	9606.ENSP00000296871	9606.ENSP00000215832	0	0	0	0	0	0	0.9	0.542	0.952
RELA	HMGB1	4447098	4441512	9606.ENSP00000384273	9606.ENSP00000345347	0	0	0	0	0.062	0.379	0.9	0.269	0.951
PLG	PLAT	4438461	4433132	9606.ENSP00000308938	9606.ENSP00000220809	0	0	0	0.756	0.056	0.379	0.9	0.953	0.951
TNF	PPARA	4448041	4447242	9606.ENSP00000398698	9606.ENSP00000385523	0	0	0	0	0	0	0.9	0.538	0.951
RELA	NOS2	4447098	4439909	9606.ENSP00000384273	9606.ENSP00000327251	0	0	0	0	0	0.343	0.9	0.327	0.951
PPARA	MAPK1	4447242	4432880	9606.ENSP00000385523	9606.ENSP00000215832	0	0	0	0	0	0.399	0.9	0.264	0.951
FGF1	MAPK3	4451524	4435180	9606.ENSP00000480791	9606.ENSP00000263025	0	0	0	0	0	0	0.9	0.525	0.95
CEBPB	MAPK14	4438125	4433482	9606.ENSP00000305422	9606.ENSP00000229795	0	0	0	0	0	0.299	0.9	0.345	0.95
ESR1	PIK3R3	4448358	4435132	9606.ENSP00000405330	9606.ENSP00000262741	0	0	0	0	0.061	0.404	0.9	0.221	0.95
GRIN2B	GRIN3A	4451206	4442616	9606.ENSP00000477455	9606.ENSP00000355155	0	0	0	0.661	0.063	0.305	0.9	0.876	0.95
SHC1	PRKCD	4448165	4446312	9606.ENSP00000401303	9606.ENSP00000378217	0	0	0	0	0.061	0.379	0.9	0.246	0.95
ITGB3	MAPK3	4450406	4435180	9606.ENSP00000452786	9606.ENSP00000263025	0	0	0	0	0.062	0.338	0.9	0.302	0.95
JUNB	STAT3	4437951	4435468	9606.ENSP00000303315	9606.ENSP00000264657	0	0	0	0	0.098	0.174	0.9	0.413	0.95
MAPK3	NFKB1	4435180	4433374	9606.ENSP00000263025	9606.ENSP00000226574	0	0	0	0	0	0.185	0.9	0.437	0.95
CASP8	NFKB1	4442125	4433374	9606.ENSP00000351273	9606.ENSP00000226574	0	0	0	0	0.062	0.178	0.9	0.437	0.95
RELA	MAPK3	4447098	4435180	9606.ENSP00000384273	9606.ENSP00000263025	0	0	0	0	0	0	0.9	0.527	0.95
BDNF	TP53	4448727	4435880	9606.ENSP00000414303	9606.ENSP00000269305	0	0	0	0	0	0	0.9	0.53	0.95
EDN1	F2	4445200	4438421	9606.ENSP00000368683	9606.ENSP00000308541	0	0	0	0	0	0	0.9	0.52	0.95
ADRB2	CRH	4438121	4436231	9606.ENSP00000305372	9606.ENSP00000276571	0	0	0	0	0	0	0.9	0.512	0.949
VCAM1	STAT3	4437090	4435468	9606.ENSP00000294728	9606.ENSP00000264657	0	0	0	0	0.061	0	0.9	0.506	0.949
ADRB2	PTGER1	4438121	4436972	9606.ENSP00000305372	9606.ENSP00000292513	0	0	0	0	0	0.379	0.9	0.245	0.949
JUN	TGFB1	4443699	4433189	9606.ENSP00000360266	9606.ENSP00000221930	0	0	0	0	0.061	0	0.9	0.51	0.949
HMGB1	MAPK3	4441512	4435180	9606.ENSP00000345347	9606.ENSP00000263025	0	0	0	0	0.057	0.077	0.9	0.492	0.949
NR1H3	PPARA	4451232	4447242	9606.ENSP00000477707	9606.ENSP00000385523	0	0	0	0.714	0.063	0.379	0.9	0.733	0.949
ADRB1	CRH	4443292	4436231	9606.ENSP00000358301	9606.ENSP00000276571	0	0	0	0	0	0	0.9	0.511	0.949
SMAD3	STUB1	4440414	4433095	9606.ENSP00000332973	9606.ENSP00000219548	0	0	0	0	0	0.32	0.9	0.311	0.949
HMGB1	NFKB1	4441512	4433374	9606.ENSP00000345347	9606.ENSP00000226574	0	0	0	0	0.042	0.393	0.9	0.228	0.949
SCNN1A	SCNN1G	4442340	4437627	9606.ENSP00000353292	9606.ENSP00000300061	0	0	0	0.844	0.064	0.432	0.9	0.833	0.949
CYP3A4	CYP2B6	4440831	4439703	9606.ENSP00000337915	9606.ENSP00000324648	0	0	0.445	0.637	0.117	0	0.9	0.927	0.948
MAPK14	NFKB1	4433482	4433374	9606.ENSP00000229795	9606.ENSP00000226574	0	0	0	0	0.065	0.185	0.9	0.409	0.948
ESR1	JUND	4448358	4434256	9606.ENSP00000405330	9606.ENSP00000252818	0	0	0	0	0	0.334	0.9	0.294	0.948
HSPA1A	HSPA4	4444600	4437917	9606.ENSP00000364802	9606.ENSP00000302961	0	0	0.433	0.792	0.215	0.192	0.9	0.887	0.948
PPARG	TGFB1	4436745	4433189	9606.ENSP00000287820	9606.ENSP00000221930	0	0	0	0	0	0	0.9	0.51	0.948
AGTR1	HTR2B	4449040	4434624	9606.ENSP00000419422	9606.ENSP00000258400	0	0	0	0.6	0	0.454	0.9	0.253	0.948
PARP1	SMAD3	4442743	4440414	9606.ENSP00000355759	9606.ENSP00000332973	0	0	0	0	0	0	0.9	0.507	0.948
RELA	RIPK1	4447098	4434726	9606.ENSP00000384273	9606.ENSP00000259808	0	0	0	0	0.062	0	0.9	0.499	0.948
RELA	MAPK14	4447098	4433482	9606.ENSP00000384273	9606.ENSP00000229795	0	0	0	0	0	0.106	0.9	0.465	0.948
ADRB1	CALCA	4443292	4440295	9606.ENSP00000358301	9606.ENSP00000331746	0	0	0	0	0	0	0.9	0.51	0.948
ESR1	TP53	4448358	4435880	9606.ENSP00000405330	9606.ENSP00000269305	0	0	0	0	0	0.379	0	0.919	0.948
CASP3	NGFR	4438651	4432715	9606.ENSP00000311032	9606.ENSP00000172229	0	0	0	0	0	0	0.9	0.498	0.947
PPARA	RELA	4447242	4447098	9606.ENSP00000385523	9606.ENSP00000384273	0	0	0	0	0	0.393	0.9	0.21	0.947
ITGB3	SERPINE1	4450406	4433266	9606.ENSP00000452786	9606.ENSP00000223095	0	0	0	0	0.126	0	0.9	0.448	0.947
USF1	MAPK14	4443013	4433482	9606.ENSP00000357000	9606.ENSP00000229795	0	0	0	0	0.05	0.085	0.9	0.464	0.947
SRC	VCAM1	4444215	4437090	9606.ENSP00000362680	9606.ENSP00000294728	0	0	0	0	0.055	0	0.9	0.484	0.947
BCL2	MAPK3	4446777	4435180	9606.ENSP00000381185	9606.ENSP00000263025	0	0	0	0	0	0.379	0.9	0.225	0.947
JUN	HMGB1	4443699	4441512	9606.ENSP00000360266	9606.ENSP00000345347	0	0	0	0	0	0.186	0.9	0.402	0.947
SP1	FOS	4440095	4438204	9606.ENSP00000329357	9606.ENSP00000306245	0	0	0	0	0	0.073	0.9	0.476	0.947
USF1	SP1	4443013	4440095	9606.ENSP00000357000	9606.ENSP00000329357	0	0	0	0	0	0.089	0.9	0.475	0.947
CALCA	ADRB2	4440295	4438121	9606.ENSP00000331746	9606.ENSP00000305372	0	0	0	0	0	0	0.9	0.499	0.947
SMAD4	CEBPB	4441161	4438125	9606.ENSP00000341551	9606.ENSP00000305422	0	0	0	0	0	0.379	0.9	0.227	0.947
ADIPOQ	CEBPB	4447630	4438125	9606.ENSP00000389814	9606.ENSP00000305422	0	0	0	0	0.061	0	0.9	0.473	0.946
CYP2R1	CYP24A1	4440580	4432987	9606.ENSP00000334592	9606.ENSP00000216862	0	0	0.437	0.602	0	0	0.9	0.907	0.946
TGFB2	SERPINE1	4442765	4433266	9606.ENSP00000355896	9606.ENSP00000223095	0	0	0	0	0.098	0	0.9	0.455	0.946
PRKCD	IGF1R	4446312	4435797	9606.ENSP00000378217	9606.ENSP00000268035	0	0	0	0.551	0.062	0.334	0.9	0.488	0.946
HTR2A	TAC1	4449830	4439413	9606.ENSP00000437737	9606.ENSP00000321106	0	0	0	0	0.097	0	0.9	0.45	0.946
SRC	AGT	4444215	4442719	9606.ENSP00000362680	9606.ENSP00000355627	0	0	0	0	0	0.053	0.9	0.478	0.946
ITGB3	TGFB1	4450406	4433189	9606.ENSP00000452786	9606.ENSP00000221930	0	0	0	0	0.129	0.168	0.9	0.344	0.946
PTEN	ROCK2	4443848	4439164	9606.ENSP00000361021	9606.ENSP00000317985	0	0	0	0	0.062	0.19	0.9	0.373	0.946
AR	PIK3CA	4444436	4435346	9606.ENSP00000363822	9606.ENSP00000263967	0	0	0	0	0	0	0.9	0.473	0.945
AR	NR3C2	4444436	4442077	9606.ENSP00000363822	9606.ENSP00000350815	0	0	0	0.779	0.061	0.379	0.9	0.67	0.945
BDNF	CDC42	4448727	4446990	9606.ENSP00000414303	9606.ENSP00000383118	0	0	0	0	0	0	0.9	0.474	0.945
PTK2B	PRKCD	4446690	4446312	9606.ENSP00000380638	9606.ENSP00000378217	0	0	0	0.556	0.067	0.384	0.9	0.301	0.945
AVP	ADRB1	4445364	4443292	9606.ENSP00000369647	9606.ENSP00000358301	0	0	0	0	0	0	0.9	0.481	0.945
AR	MAPK14	4444436	4433482	9606.ENSP00000363822	9606.ENSP00000229795	0	0	0	0	0	0.073	0.9	0.462	0.945
ALOX5	IL4	4444382	4433533	9606.ENSP00000363512	9606.ENSP00000231449	0	0	0	0	0	0	0.9	0.473	0.945
HIF1A	EDN1	4449842	4445200	9606.ENSP00000437955	9606.ENSP00000368683	0	0	0	0	0	0	0.9	0.48	0.945
BCL2	MAPK1	4446777	4432880	9606.ENSP00000381185	9606.ENSP00000215832	0	0	0	0	0	0.379	0.9	0.198	0.945
ADRA1A	AVP	4445417	4445364	9606.ENSP00000369960	9606.ENSP00000369647	0	0	0	0	0	0	0.9	0.477	0.945
AKT1	PIK3CD	4450372	4444876	9606.ENSP00000451828	9606.ENSP00000366563	0	0	0	0	0.063	0.179	0.8	0.69	0.945
PDE1A	CALM1	4448547	4441930	9606.ENSP00000410309	9606.ENSP00000349467	0	0	0	0	0.109	0.75	0.6	0.447	0.944
MAPK3	NR3C1	4435180	4433539	9606.ENSP00000263025	9606.ENSP00000231509	0	0	0	0	0	0.073	0.9	0.448	0.944
AKT1	SIRT1	4450372	4432849	9606.ENSP00000451828	9606.ENSP00000212015	0	0	0	0	0.063	0.436	0	0.903	0.944
SMAD4	JUNB	4441161	4437951	9606.ENSP00000341551	9606.ENSP00000303315	0	0	0	0	0.056	0.345	0.9	0.21	0.944
TGFB1	MAPK1	4433189	4432880	9606.ENSP00000221930	9606.ENSP00000215832	0	0	0	0	0.049	0.078	0.9	0.445	0.944
NOS1	AKT1	4451263	4450372	9606.ENSP00000477999	9606.ENSP00000451828	0	0	0	0	0.049	0.065	0.8	0.725	0.944
AR	NR3C1	4444436	4433539	9606.ENSP00000363822	9606.ENSP00000231509	0	0	0	0.816	0	0.379	0.9	0.806	0.944
CASP3	TP53	4438651	4435880	9606.ENSP00000311032	9606.ENSP00000269305	0	0	0	0	0.061	0	0	0.942	0.944
ESR2	SP1	4441379	4440095	9606.ENSP00000343925	9606.ENSP00000329357	0	0	0	0	0	0.424	0.8	0.56	0.944
MPO	MAPK1	4433305	4432880	9606.ENSP00000225275	9606.ENSP00000215832	0	0	0	0	0	0.077	0.9	0.445	0.944
TNF	PSMB9	4448041	4444464	9606.ENSP00000398698	9606.ENSP00000363993	0	0	0	0	0.11	0	0.9	0.426	0.944
VDR	SMAD4	4450226	4441161	9606.ENSP00000447173	9606.ENSP00000341551	0	0	0	0	0	0.064	0.9	0.458	0.944
AVP	ADRB2	4445364	4438121	9606.ENSP00000369647	9606.ENSP00000305372	0	0	0	0	0	0	0.9	0.456	0.943
STAT3	PIK3CA	4435468	4435346	9606.ENSP00000264657	9606.ENSP00000263967	0	0	0	0	0.049	0	0.9	0.454	0.943
NR3C2	NR3C1	4442077	4433539	9606.ENSP00000350815	9606.ENSP00000231509	0	0	0	0.861	0	0.379	0.9	0.942	0.943
HMGB1	NR3C1	4441512	4433539	9606.ENSP00000345347	9606.ENSP00000231509	0	0	0	0	0	0.313	0.9	0.241	0.943
AKT1	SMAD3	4450372	4440414	9606.ENSP00000451828	9606.ENSP00000332973	0	0	0	0	0.062	0.542	0	0.877	0.943
ACTB	CASP3	4441991	4438651	9606.ENSP00000349960	9606.ENSP00000311032	0	0	0	0	0.061	0.108	0.8	0.702	0.943
HSPA1A	MAPK3	4444600	4435180	9606.ENSP00000364802	9606.ENSP00000263025	0	0	0	0	0	0.185	0.9	0.362	0.943
RB1	MAPK14	4435747	4433482	9606.ENSP00000267163	9606.ENSP00000229795	0	0	0	0	0.061	0.348	0.9	0.179	0.943
F2	P2RY1	4438421	4438073	9606.ENSP00000308541	9606.ENSP00000304767	0	0	0	0	0	0	0.9	0.457	0.943
FOS	TGFB1	4438204	4433189	9606.ENSP00000306245	9606.ENSP00000221930	0	0	0	0	0	0	0.9	0.448	0.942
RELA	IL4	4447098	4433533	9606.ENSP00000384273	9606.ENSP00000231449	0	0	0	0	0	0	0.9	0.451	0.942
SMAD4	POU5F1	4441161	4434735	9606.ENSP00000341551	9606.ENSP00000259915	0	0	0	0	0	0.058	0.9	0.434	0.942
CTNNB1	FOS	4441426	4438204	9606.ENSP00000344456	9606.ENSP00000306245	0	0	0	0	0	0	0.9	0.447	0.942
AGT	MAPK1	4442719	4432880	9606.ENSP00000355627	9606.ENSP00000215832	0	0	0	0	0	0	0.9	0.45	0.942
ADRA2C	AGTR2	4447303	4443835	9606.ENSP00000386069	9606.ENSP00000360973	0	0	0	0	0	0	0.9	0.444	0.942
SRC	PIK3CB	4444215	4436798	9606.ENSP00000362680	9606.ENSP00000289153	0	0	0	0	0.058	0.124	0.9	0.385	0.942
PRKCD	ADRA2A	4446312	4436361	9606.ENSP00000378217	9606.ENSP00000280155	0	0	0	0	0	0.379	0.9	0.137	0.941
RELA	SRC	4447098	4444215	9606.ENSP00000384273	9606.ENSP00000362680	0	0	0	0	0.063	0	0.9	0.427	0.941
AKT1	BCL2	4450372	4446777	9606.ENSP00000451828	9606.ENSP00000381185	0	0	0	0	0.061	0	0.9	0.426	0.941
AGTR2	ADRA2A	4443835	4436361	9606.ENSP00000360973	9606.ENSP00000280155	0	0	0	0	0.06	0	0.9	0.429	0.941
SP1	JUND	4440095	4434256	9606.ENSP00000329357	9606.ENSP00000252818	0	0	0	0	0	0.095	0.9	0.403	0.941
AVP	F2	4445364	4438421	9606.ENSP00000369647	9606.ENSP00000308541	0	0	0	0	0	0	0.9	0.441	0.941
SCN5A	CALM2	4448544	4436014	9606.ENSP00000410257	9606.ENSP00000272298	0	0	0	0	0.061	0.916	0	0.308	0.941
SRC	MAPK14	4444215	4433482	9606.ENSP00000362680	9606.ENSP00000229795	0	0	0.254	0.627	0	0.146	0.9	0.765	0.941
ADRA2B	AGTR2	4451505	4443835	9606.ENSP00000480573	9606.ENSP00000360973	0	0	0	0	0	0	0.9	0.442	0.941
ESR1	ESR2	4448358	4441379	9606.ENSP00000405330	9606.ENSP00000343925	0	0	0	0.925	0.061	0.379	0.9	0.967	0.941
PPARG	RB1	4436745	4435747	9606.ENSP00000287820	9606.ENSP00000267163	0	0	0	0	0	0.315	0.9	0.221	0.941
EDN1	NOS3	4445200	4437409	9606.ENSP00000368683	9606.ENSP00000297494	0	0	0	0	0	0	0	0.941	0.941
G6PD	TP53	4446162	4435880	9606.ENSP00000377192	9606.ENSP00000269305	0	0	0	0	0.061	0	0.8	0.712	0.941
RB1	MAPK3	4435747	4435180	9606.ENSP00000267163	9606.ENSP00000263025	0	0	0	0	0.061	0	0.9	0.419	0.94
SRC	PAK1	4444215	4436295	9606.ENSP00000362680	9606.ENSP00000278568	0	0	0.32	0.568	0.062	0.157	0.9	0.503	0.94
SMAD4	FOS	4441161	4438204	9606.ENSP00000341551	9606.ENSP00000306245	0	0	0	0	0	0	0.9	0.425	0.94
ADIPOQ	NR3C1	4447630	4433539	9606.ENSP00000389814	9606.ENSP00000231509	0	0	0	0	0	0	0.9	0.428	0.94
MAPK3	MAPK14	4435180	4433482	9606.ENSP00000263025	9606.ENSP00000229795	0	0	0.394	0.924	0	0.687	0.8	0.886	0.94
F2	MAPK3	4438421	4435180	9606.ENSP00000308541	9606.ENSP00000263025	0	0	0	0	0	0.053	0.9	0.425	0.94
PTGS1	MPO	4442503	4433305	9606.ENSP00000354612	9606.ENSP00000225275	0	0	0	0	0.076	0	0.9	0.408	0.94
PLA2G1B	MAPK3	4438770	4435180	9606.ENSP00000312286	9606.ENSP00000263025	0	0	0	0	0	0	0.9	0.429	0.94
PRKCD	NFKB1	4446312	4433374	9606.ENSP00000378217	9606.ENSP00000226574	0	0	0	0	0.089	0.084	0.9	0.358	0.939
AKT1	CDC42	4450372	4446990	9606.ENSP00000451828	9606.ENSP00000383118	0	0	0	0	0.063	0.16	0	0.928	0.939
F2	C5	4438421	4433289	9606.ENSP00000308541	9606.ENSP00000223642	0	0	0	0	0.158	0.05	0.9	0.328	0.939
ITGB3	CDC42	4450406	4446990	9606.ENSP00000452786	9606.ENSP00000383118	0	0	0	0	0.077	0.069	0.9	0.375	0.939
VKORC1	NQO1	4446359	4439310	9606.ENSP00000378426	9606.ENSP00000319788	0	0	0	0	0.064	0	0.9	0.41	0.939
RELA	PRKACA	4447098	4438521	9606.ENSP00000384273	9606.ENSP00000309591	0	0	0	0	0.069	0.379	0.9	0.072	0.939
PRKACA	NFKB1	4438521	4433374	9606.ENSP00000309591	9606.ENSP00000226574	0	0	0	0	0.097	0.386	0.9	0.041	0.939
SHC1	PIK3CB	4448165	4436798	9606.ENSP00000401303	9606.ENSP00000289153	0	0	0	0	0	0	0.9	0.409	0.938
TLR7	TLR3	4445433	4437339	9606.ENSP00000370034	9606.ENSP00000296795	0	0	0	0.6	0.063	0	0.9	0.938	0.938
IGF1R	MAPK3	4435797	4435180	9606.ENSP00000268035	9606.ENSP00000263025	0	0	0	0.568	0	0.146	0.9	0.727	0.938
ACTB	NR3C1	4441991	4433539	9606.ENSP00000349960	9606.ENSP00000231509	0	0	0	0	0	0.05	0.9	0.402	0.938
AGT	ADRB2	4442719	4438121	9606.ENSP00000355627	9606.ENSP00000305372	0	0	0	0	0	0.051	0.9	0.4	0.938
PPARA	JUN	4447242	4443699	9606.ENSP00000385523	9606.ENSP00000360266	0	0	0	0	0	0.082	0.9	0.385	0.938
CALM1	KCNN4	4441930	4435156	9606.ENSP00000349467	9606.ENSP00000262888	0	0	0	0	0	0.907	0	0.347	0.937
CRYZ	JUN	4448088	4443699	9606.ENSP00000399805	9606.ENSP00000360266	0	0	0	0	0	0	0.9	0.397	0.937
PLA2G1B	MAPK1	4438770	4432880	9606.ENSP00000312286	9606.ENSP00000215832	0	0	0	0	0	0	0.9	0.4	0.937
FGF1	MAPK1	4451524	4432880	9606.ENSP00000480791	9606.ENSP00000215832	0	0	0	0	0	0	0.9	0.397	0.937
TNF	SP1	4448041	4440095	9606.ENSP00000398698	9606.ENSP00000329357	0	0	0	0	0	0.084	0.9	0.376	0.937
SREBF1	SIRT1	4441794	4432849	9606.ENSP00000348069	9606.ENSP00000212015	0	0	0	0	0	0.472	0	0.885	0.937
ANXA1	NR3C1	4444796	4433539	9606.ENSP00000366109	9606.ENSP00000231509	0	0	0	0	0.065	0	0.9	0.381	0.937
CAV1	SMAD3	4440933	4440414	9606.ENSP00000339191	9606.ENSP00000332973	0	0	0	0	0.077	0	0.9	0.376	0.937
AGTR2	REN	4443835	4436004	9606.ENSP00000360973	9606.ENSP00000272190	0	0	0	0	0	0	0	0.936	0.936
TLR8	TLR3	4438750	4437339	9606.ENSP00000312082	9606.ENSP00000296795	0	0	0	0.597	0.061	0	0.9	0.875	0.936
PTGS2	CYP2B6	4442894	4439703	9606.ENSP00000356438	9606.ENSP00000324648	0	0	0	0	0.055	0	0.9	0.384	0.936
EDN1	HTR2B	4445200	4434624	9606.ENSP00000368683	9606.ENSP00000258400	0	0	0	0	0.062	0.157	0.9	0.288	0.936
HSPA1A	MAPK1	4444600	4432880	9606.ENSP00000364802	9606.ENSP00000215832	0	0	0	0	0	0.157	0.9	0.303	0.936
SERPINF2	SERPINE1	4439481	4433266	9606.ENSP00000321853	9606.ENSP00000223095	0	0	0.446	0.663	0.065	0	0.9	0.735	0.936
ABCA1	PRKACA	4444444	4438521	9606.ENSP00000363868	9606.ENSP00000309591	0	0	0	0	0.062	0.379	0.9	0.046	0.936
SRC	FOS	4444215	4438204	9606.ENSP00000362680	9606.ENSP00000306245	0	0	0	0	0	0.084	0.8	0.676	0.935
AGTR1	AVP	4449040	4445364	9606.ENSP00000419422	9606.ENSP00000369647	0	0	0	0	0	0	0.9	0.38	0.935
REST	TP53	4438728	4435880	9606.ENSP00000311816	9606.ENSP00000269305	0	0	0	0	0.061	0.056	0.9	0.354	0.935
LTA	RIPK1	4448275	4434726	9606.ENSP00000403495	9606.ENSP00000259808	0	0	0	0	0.057	0.326	0.9	0.104	0.935
CYP17A1	CYP3A4	4443418	4440831	9606.ENSP00000358903	9606.ENSP00000337915	0	0	0.435	0.631	0.063	0	0.9	0.625	0.935
SREBF1	CASP3	4441794	4438651	9606.ENSP00000348069	9606.ENSP00000311032	0	0	0	0	0	0	0.9	0.385	0.935
ALOX5	CYP2B6	4444382	4439703	9606.ENSP00000363512	9606.ENSP00000324648	0	0	0	0	0	0	0.9	0.384	0.935
ITGB3	COL5A1	4450406	4443819	9606.ENSP00000452786	9606.ENSP00000360882	0	0	0	0	0.107	0	0.9	0.331	0.935
PRKACA	NR3C1	4438521	4433539	9606.ENSP00000309591	9606.ENSP00000231509	0	0	0	0	0.049	0.379	0.9	0	0.935
TGFB2	TGFB1	4442765	4433189	9606.ENSP00000355896	9606.ENSP00000221930	0	0	0	0.902	0	0.32	0.9	0.793	0.934
PSMB9	TP53	4444464	4435880	9606.ENSP00000363993	9606.ENSP00000269305	0	0	0	0	0.061	0	0.9	0.357	0.934
SRC	NFKB1	4444215	4433374	9606.ENSP00000362680	9606.ENSP00000226574	0	0	0	0	0.063	0.125	0.9	0.296	0.934
NR3C1	MAPK14	4433539	4433482	9606.ENSP00000231509	9606.ENSP00000229795	0	0	0	0	0	0.073	0.9	0.347	0.934
IGF1R	MAPK1	4435797	4432880	9606.ENSP00000268035	9606.ENSP00000215832	0	0	0	0.57	0	0.146	0.9	0.638	0.934
HIF1A	SMAD4	4449842	4441161	9606.ENSP00000437955	9606.ENSP00000341551	0	0	0	0	0	0.057	0.9	0.358	0.934
EPHX2	CYP2B6	4449539	4439703	9606.ENSP00000430269	9606.ENSP00000324648	0.056	0	0	0	0.051	0.081	0.9	0.326	0.934
CTNNB1	MAPK14	4441426	4433482	9606.ENSP00000344456	9606.ENSP00000229795	0	0	0	0	0.064	0.063	0.9	0.335	0.933
HIF1A	NR3C1	4449842	4433539	9606.ENSP00000437955	9606.ENSP00000231509	0	0	0	0	0	0.095	0.9	0.326	0.933
PPARA	AGT	4447242	4442719	9606.ENSP00000385523	9606.ENSP00000355627	0	0	0	0	0.063	0.051	0.9	0.345	0.933
PIK3CA	NFKB1	4435346	4433374	9606.ENSP00000263967	9606.ENSP00000226574	0	0	0	0	0.075	0.126	0.9	0.275	0.933
BDNF	CTNNB1	4448727	4441426	9606.ENSP00000414303	9606.ENSP00000344456	0	0	0	0	0	0	0.9	0.354	0.932
ALOX15	CYP2B6	4450608	4439703	9606.ENSP00000458832	9606.ENSP00000324648	0	0	0	0	0	0	0.9	0.357	0.932
HTR2A	EDN1	4449830	4445200	9606.ENSP00000437737	9606.ENSP00000368683	0	0	0	0	0	0.157	0.9	0.261	0.932
ATM	CCNH	4436300	4434515	9606.ENSP00000278616	9606.ENSP00000256897	0	0	0	0	0.061	0	0.9	0.337	0.932
CRH	PTGER2	4436231	4433932	9606.ENSP00000276571	9606.ENSP00000245457	0	0	0	0	0	0	0.9	0.354	0.932
OPRM1	DRD2	4447859	4442557	9606.ENSP00000394624	9606.ENSP00000354859	0	0	0	0.583	0	0	0.9	0.789	0.932
HSPA1A	SIRT1	4444600	4432849	9606.ENSP00000364802	9606.ENSP00000212015	0	0	0	0	0	0.087	0.9	0.321	0.932
JUNB	IL4	4437951	4433533	9606.ENSP00000303315	9606.ENSP00000231449	0	0	0	0	0	0	0.9	0.35	0.932
AKT1	AR	4450372	4444436	9606.ENSP00000451828	9606.ENSP00000363822	0	0	0	0	0	0.407	0	0.89	0.932
BCL2	STAT3	4446777	4435468	9606.ENSP00000381185	9606.ENSP00000264657	0	0	0	0	0	0.186	0.9	0.225	0.931
AGTR1	F2	4449040	4438421	9606.ENSP00000419422	9606.ENSP00000308541	0	0	0	0	0.063	0	0.9	0.325	0.931
AKT1	MAPK14	4450372	4433482	9606.ENSP00000451828	9606.ENSP00000229795	0	0	0.303	0.623	0.082	0.715	0.6	0.858	0.931
F2	MAPK1	4438421	4432880	9606.ENSP00000308541	9606.ENSP00000215832	0	0	0	0	0	0.053	0.9	0.331	0.931
SHC1	PIK3CA	4448165	4435346	9606.ENSP00000401303	9606.ENSP00000263967	0	0	0	0	0	0	0.9	0.345	0.931
SP1	JUNB	4440095	4437951	9606.ENSP00000329357	9606.ENSP00000303315	0	0	0	0	0.046	0.095	0.9	0.295	0.931
CDC42	EDN1	4446990	4445200	9606.ENSP00000383118	9606.ENSP00000368683	0	0	0	0	0	0	0.9	0.338	0.931
PIK3CA	IL4	4435346	4433533	9606.ENSP00000263967	9606.ENSP00000231449	0	0	0	0	0	0.187	0.9	0.227	0.931
EDN1	PTGER1	4445200	4436972	9606.ENSP00000368683	9606.ENSP00000292513	0	0	0	0	0	0.157	0.9	0.245	0.93
RELA	ACTB	4447098	4441991	9606.ENSP00000384273	9606.ENSP00000349960	0	0	0	0	0.061	0	0.9	0.319	0.93
ADRB1	ADRB2	4443292	4438121	9606.ENSP00000358301	9606.ENSP00000305372	0	0	0	0.937	0	0.299	0.9	0.864	0.93
ADRA1A	P2RY1	4445417	4438073	9606.ENSP00000369960	9606.ENSP00000304767	0	0	0	0	0	0.064	0.9	0.313	0.93
HTR2A	P2RY1	4449830	4438073	9606.ENSP00000437737	9606.ENSP00000304767	0	0	0	0	0	0.064	0.9	0.313	0.93
PLA2G1B	MAPK14	4438770	4433482	9606.ENSP00000312286	9606.ENSP00000229795	0	0	0	0	0	0	0.9	0.33	0.93
ADRB2	PTGER2	4438121	4433932	9606.ENSP00000305372	9606.ENSP00000245457	0	0	0	0	0.084	0	0.9	0.304	0.93
CALCA	TAC1	4440295	4439413	9606.ENSP00000331746	9606.ENSP00000321106	0	0	0	0	0.061	0	0	0.928	0.929
AGTR1	TAC1	4449040	4439413	9606.ENSP00000419422	9606.ENSP00000321106	0	0	0	0	0	0	0.9	0.323	0.929
CRYZ	NQO1	4448088	4439310	9606.ENSP00000399805	9606.ENSP00000319788	0.07	0	0	0	0	0	0	0.927	0.929
SRC	SGK1	4444215	4442972	9606.ENSP00000362680	9606.ENSP00000356832	0	0	0.223	0.56	0.049	0.129	0.9	0.359	0.929
TAC1	CHRM1	4439413	4438226	9606.ENSP00000321106	9606.ENSP00000306490	0	0	0	0	0.17	0	0.9	0.215	0.929
CTNNB1	KAT5	4441426	4441035	9606.ENSP00000344456	9606.ENSP00000340330	0	0	0	0	0.055	0.124	0.9	0.243	0.929
AGT	TAC1	4442719	4439413	9606.ENSP00000355627	9606.ENSP00000321106	0	0	0	0	0.072	0	0.9	0.3	0.929
PTK2B	VCAM1	4446690	4437090	9606.ENSP00000380638	9606.ENSP00000294728	0	0	0	0	0.064	0	0.9	0.311	0.929
PDGFA	PIK3CA	4441629	4435346	9606.ENSP00000346508	9606.ENSP00000263967	0	0	0	0	0	0	0.9	0.323	0.929
PTK2B	MAPK14	4446690	4433482	9606.ENSP00000380638	9606.ENSP00000229795	0	0	0	0.571	0.064	0.157	0.9	0.445	0.929
PPARA	EDN1	4447242	4445200	9606.ENSP00000385523	9606.ENSP00000368683	0	0	0	0	0	0	0.9	0.31	0.928
AGTR1	ACE	4449040	4436887	9606.ENSP00000419422	9606.ENSP00000290866	0	0	0	0	0.06	0	0	0.927	0.928
MT-CO1	COX8A	4442477	4439425	9606.ENSP00000354499	9606.ENSP00000321260	0	0	0	0	0	0	0.9	0.311	0.928
HSPA1A	NR3C2	4444600	4442077	9606.ENSP00000364802	9606.ENSP00000350815	0	0	0	0	0	0.109	0.9	0.253	0.927
ADORA1	DRD2	4442839	4442557	9606.ENSP00000356205	9606.ENSP00000354859	0	0	0	0.642	0.088	0	0.9	0.669	0.927
OPRM1	ADRA2C	4447859	4447303	9606.ENSP00000394624	9606.ENSP00000386069	0	0	0	0.612	0	0	0.9	0.709	0.927
PIK3CG	PIK3CB	4442215	4436798	9606.ENSP00000352121	9606.ENSP00000289153	0	0	0	0.796	0.061	0.157	0.9	0.807	0.927
OPRM1	ADRA2A	4447859	4436361	9606.ENSP00000394624	9606.ENSP00000280155	0	0	0	0.6	0	0	0.9	0.71	0.927
ADRA2B	OPRM1	4451505	4447859	9606.ENSP00000480573	9606.ENSP00000394624	0	0	0	0.6	0	0	0.9	0.71	0.927
NR1H3	JUN	4451232	4443699	9606.ENSP00000477707	9606.ENSP00000360266	0	0	0	0	0.061	0.082	0.9	0.249	0.926
ACTB	HMGB1	4441991	4441512	9606.ENSP00000349960	9606.ENSP00000345347	0	0	0	0	0.061	0.088	0.9	0.244	0.926
TAC1	HTR2B	4439413	4434624	9606.ENSP00000321106	9606.ENSP00000258400	0	0	0	0	0	0	0.9	0.293	0.926
CDC42	PIK3R3	4446990	4435132	9606.ENSP00000383118	9606.ENSP00000262741	0	0	0	0	0	0.125	0.9	0.232	0.926
TNF	PTGS2	4448041	4442894	9606.ENSP00000398698	9606.ENSP00000356438	0	0	0	0	0.096	0	0	0.921	0.926
CALM3	KCNN4	4436903	4435156	9606.ENSP00000291295	9606.ENSP00000262888	0	0	0	0	0	0.907	0	0.24	0.926
TAC1	P2RY1	4439413	4438073	9606.ENSP00000321106	9606.ENSP00000304767	0	0	0	0	0	0	0.9	0.294	0.926
JUN	TGFB2	4443699	4442765	9606.ENSP00000360266	9606.ENSP00000355896	0	0	0	0	0	0	0.9	0.295	0.926
ITGB3	MAPK1	4450406	4432880	9606.ENSP00000452786	9606.ENSP00000215832	0	0	0	0	0.062	0.067	0.9	0.262	0.926
AGTR2	ACE	4443835	4436887	9606.ENSP00000360973	9606.ENSP00000290866	0	0	0	0	0.061	0.379	0	0.883	0.926
ADRA2C	ADORA1	4447303	4442839	9606.ENSP00000386069	9606.ENSP00000356205	0	0	0	0.617	0.106	0	0.9	0.582	0.926
MT-CO2	PTGS1	4442560	4442503	9606.ENSP00000354876	9606.ENSP00000354612	0	0	0	0	0	0	0.9	0.292	0.926
AR	PTEN	4444436	4443848	9606.ENSP00000363822	9606.ENSP00000361021	0	0	0	0	0	0.393	0	0.882	0.926
JUN	REST	4443699	4438728	9606.ENSP00000360266	9606.ENSP00000311816	0	0	0	0	0	0.095	0.9	0.25	0.926
PIK3CG	PIK3CA	4442215	4435346	9606.ENSP00000352121	9606.ENSP00000263967	0	0	0	0.815	0.061	0.154	0.9	0.729	0.925
PARP1	CCNH	4442743	4434515	9606.ENSP00000355759	9606.ENSP00000256897	0	0	0	0	0.112	0	0.9	0.233	0.925
SHC1	CSF2	4448165	4437349	9606.ENSP00000401303	9606.ENSP00000296871	0	0	0	0	0	0	0.9	0.283	0.925
ANXA1	IL4	4444796	4433533	9606.ENSP00000366109	9606.ENSP00000231449	0	0	0	0	0	0	0.9	0.286	0.925
ADORA1	HRH3	4442839	4441265	9606.ENSP00000356205	9606.ENSP00000342560	0	0	0	0.589	0.183	0	0.9	0.342	0.925
ESR1	NR3C1	4448358	4433539	9606.ENSP00000405330	9606.ENSP00000231509	0	0	0	0.66	0	0	0.9	0.751	0.925
PTGS1	CYP2B6	4442503	4439703	9606.ENSP00000354612	9606.ENSP00000324648	0	0	0	0	0.055	0	0.9	0.275	0.925
JUN	JUND	4443699	4434256	9606.ENSP00000360266	9606.ENSP00000252818	0	0	0	0.927	0.152	0.127	0.9	0.943	0.925
SMAD4	NR3C1	4441161	4433539	9606.ENSP00000341551	9606.ENSP00000231509	0	0	0	0	0.069	0.064	0.9	0.25	0.925
ADRA1A	PTGER1	4445417	4436972	9606.ENSP00000369960	9606.ENSP00000292513	0	0	0	0	0	0	0.9	0.281	0.925
ESR1	BCL2	4448358	4446777	9606.ENSP00000405330	9606.ENSP00000381185	0	0	0	0	0.069	0.064	0.9	0.244	0.925
P4HB	ADAM10	4439955	4434780	9606.ENSP00000327801	9606.ENSP00000260408	0	0	0	0	0	0	0.9	0.287	0.925
REST	PPARG	4438728	4436745	9606.ENSP00000311816	9606.ENSP00000287820	0	0	0	0	0	0.111	0.9	0.22	0.924
ITGB3	IGF1R	4450406	4435797	9606.ENSP00000452786	9606.ENSP00000268035	0	0	0	0	0.055	0.08	0.9	0.238	0.924
HTR2A	CHRM1	4449830	4438226	9606.ENSP00000437737	9606.ENSP00000306490	0	0	0	0.625	0.152	0	0.9	0.418	0.924
ADRA2C	AGT	4447303	4442719	9606.ENSP00000386069	9606.ENSP00000355627	0	0	0	0	0.077	0.051	0.9	0.244	0.924
SMARCA4	RELA	4447900	4447098	9606.ENSP00000395654	9606.ENSP00000384273	0	0	0	0	0.083	0	0.9	0.247	0.924
HRH1	EDN1	4446629	4445200	9606.ENSP00000380247	9606.ENSP00000368683	0	0	0	0	0.06	0	0.9	0.26	0.924
TH	GOT1	4445511	4443556	9606.ENSP00000370571	9606.ENSP00000359539	0.081	0	0	0	0.055	0	0.9	0.228	0.924
TGFB2	FOS	4442765	4438204	9606.ENSP00000355896	9606.ENSP00000306245	0	0	0	0	0	0	0.9	0.262	0.923
TGFB2	PLG	4442765	4438461	9606.ENSP00000355896	9606.ENSP00000308938	0	0	0	0	0	0	0.9	0.269	0.923
PARK7	PTEN	4448989	4443848	9606.ENSP00000418770	9606.ENSP00000361021	0	0	0	0	0.063	0.472	0	0.856	0.923
HRH2	CALCA	4444864	4440295	9606.ENSP00000366506	9606.ENSP00000331746	0	0	0	0	0	0	0.9	0.268	0.923
HTR2A	HRH1	4449830	4446629	9606.ENSP00000437737	9606.ENSP00000380247	0	0	0	0.626	0.061	0	0.9	0.604	0.923
CALCA	ADORA2B	4440295	4438057	9606.ENSP00000331746	9606.ENSP00000304501	0	0	0	0	0	0	0.9	0.269	0.923
ADORA1	ADRA2A	4442839	4436361	9606.ENSP00000356205	9606.ENSP00000280155	0	0	0	0.637	0.075	0	0.9	0.581	0.923
CASP3	PAK1	4438651	4436295	9606.ENSP00000311032	9606.ENSP00000278568	0	0	0	0	0.055	0	0.9	0.251	0.923
BDNF	ADAM17	4448727	4438549	9606.ENSP00000414303	9606.ENSP00000309968	0	0	0	0	0	0	0.9	0.269	0.923
CTNNB1	ADAM10	4441426	4434780	9606.ENSP00000344456	9606.ENSP00000260408	0	0	0	0	0.063	0	0.9	0.248	0.923
RELA	PIK3CA	4447098	4435346	9606.ENSP00000384273	9606.ENSP00000263967	0	0	0	0	0	0	0.9	0.26	0.922
NR1H3	RELA	4451232	4447098	9606.ENSP00000477707	9606.ENSP00000384273	0	0	0	0	0.062	0.064	0.9	0.224	0.922
CRYZ	FOS	4448088	4438204	9606.ENSP00000399805	9606.ENSP00000306245	0	0	0	0	0.049	0	0.9	0.25	0.922
TH	MAPK14	4445511	4433482	9606.ENSP00000370571	9606.ENSP00000229795	0	0	0	0	0	0.079	0.9	0.224	0.922
PPARA	NOS2	4447242	4439909	9606.ENSP00000385523	9606.ENSP00000327251	0	0	0	0	0	0.091	0.9	0.211	0.922
ITGB3	HMGB1	4450406	4441512	9606.ENSP00000452786	9606.ENSP00000345347	0	0	0	0	0.064	0	0.9	0.234	0.922
TAC1	F2	4439413	4438421	9606.ENSP00000321106	9606.ENSP00000308541	0	0	0	0	0	0	0.9	0.247	0.921
ADAM17	NGFR	4438549	4432715	9606.ENSP00000309968	9606.ENSP00000172229	0	0	0	0	0	0	0.9	0.243	0.921
JUN	STAT3	4443699	4435468	9606.ENSP00000360266	9606.ENSP00000264657	0	0	0	0	0.055	0.476	0	0.852	0.921
ADRA1A	AGT	4445417	4442719	9606.ENSP00000369960	9606.ENSP00000355627	0	0	0	0	0.06	0.051	0.9	0.224	0.921
ADRA2B	ADORA1	4451505	4442839	9606.ENSP00000480573	9606.ENSP00000356205	0	0	0	0.649	0.062	0	0.9	0.591	0.921
RELA	TGFB1	4447098	4433189	9606.ENSP00000384273	9606.ENSP00000221930	0	0	0	0	0.083	0	0.9	0.211	0.921
CSF2	IL4	4437349	4433533	9606.ENSP00000296871	9606.ENSP00000231449	0	0	0	0	0	0	0	0.921	0.921
PPARA	SP1	4447242	4440095	9606.ENSP00000385523	9606.ENSP00000329357	0	0	0	0	0	0.111	0.9	0.19	0.921
HTR2A	AVP	4449830	4445364	9606.ENSP00000437737	9606.ENSP00000369647	0	0	0	0	0	0	0.9	0.25	0.921
SHC1	PDGFA	4448165	4441629	9606.ENSP00000401303	9606.ENSP00000346508	0	0	0	0	0	0	0.9	0.239	0.92
AKT1	SMAD4	4450372	4441161	9606.ENSP00000451828	9606.ENSP00000341551	0	0	0	0	0.061	0.705	0	0.735	0.92
HRH1	P2RY1	4446629	4438073	9606.ENSP00000380247	9606.ENSP00000304767	0	0	0	0	0	0	0.9	0.233	0.92
RELA	PRKCD	4447098	4446312	9606.ENSP00000384273	9606.ENSP00000378217	0	0	0	0	0.061	0	0.9	0.22	0.92
AGTR1	ADRB2	4449040	4438121	9606.ENSP00000419422	9606.ENSP00000305372	0	0	0	0.614	0	0	0.9	0.556	0.92
APRT	ADA	4445041	4444047	9606.ENSP00000367615	9606.ENSP00000361965	0.07	0	0	0	0.172	0.604	0	0.77	0.92
RIPK1	MAPK14	4434726	4433482	9606.ENSP00000259808	9606.ENSP00000229795	0	0	0	0.602	0	0.146	0.9	0.286	0.92
OPRM1	ADORA1	4447859	4442839	9606.ENSP00000394624	9606.ENSP00000356205	0	0	0	0.609	0	0	0.9	0.543	0.92
ADORA2B	PTGER2	4438057	4433932	9606.ENSP00000304501	9606.ENSP00000245457	0	0	0	0	0.061	0	0.9	0.224	0.92
JUN	MT-CO2	4443699	4442560	9606.ENSP00000360266	9606.ENSP00000354876	0	0	0	0	0	0.108	0.9	0.176	0.92
AGTR1	ADRA1A	4449040	4445417	9606.ENSP00000419422	9606.ENSP00000369960	0	0	0	0.602	0.043	0	0.9	0.532	0.92
PSMB9	NFKB1	4444464	4433374	9606.ENSP00000363993	9606.ENSP00000226574	0	0	0	0	0.064	0	0.9	0.213	0.919
AGT	PTGER1	4442719	4436972	9606.ENSP00000355627	9606.ENSP00000292513	0	0	0	0	0	0.051	0.9	0.221	0.919
HIF1A	P4HB	4449842	4439955	9606.ENSP00000437955	9606.ENSP00000327801	0	0	0	0	0	0	0.9	0.227	0.919
SHC1	TGFB1	4448165	4433189	9606.ENSP00000401303	9606.ENSP00000221930	0	0	0	0	0	0	0.9	0.228	0.919
HRH1	HTR2B	4446629	4434624	9606.ENSP00000380247	9606.ENSP00000258400	0	0	0	0.62	0	0	0.9	0.529	0.919
ADRA2C	DRD2	4447303	4442557	9606.ENSP00000386069	9606.ENSP00000354859	0	0	0	0.8	0.089	0	0.9	0.765	0.919
EDN1	PIK3R3	4445200	4435132	9606.ENSP00000368683	9606.ENSP00000262741	0	0	0	0	0	0	0.9	0.229	0.919
HTR2A	ADRA1A	4449830	4445417	9606.ENSP00000437737	9606.ENSP00000369960	0	0	0	0.7	0	0	0.9	0.675	0.919
DRD2	HRH3	4442557	4441265	9606.ENSP00000354859	9606.ENSP00000342560	0	0	0	0.712	0.123	0	0.9	0.435	0.919
ACTB	BAZ1B	4441991	4441256	9606.ENSP00000349960	9606.ENSP00000342434	0	0	0	0	0	0.162	0.9	0.118	0.919
PIK3CA	NR3C1	4435346	4433539	9606.ENSP00000263967	9606.ENSP00000231509	0	0	0	0	0.081	0	0.9	0.19	0.919
RELA	PSMB9	4447098	4444464	9606.ENSP00000384273	9606.ENSP00000363993	0	0	0	0	0.061	0	0.9	0.214	0.919
TNF	ADIPOQ	4448041	4447630	9606.ENSP00000398698	9606.ENSP00000389814	0	0	0	0	0	0	0	0.917	0.918
P2RY1	PTGER1	4438073	4436972	9606.ENSP00000304767	9606.ENSP00000292513	0	0	0	0	0	0.064	0.9	0.197	0.918
AGTR2	ADRB2	4443835	4438121	9606.ENSP00000360973	9606.ENSP00000305372	0	0	0	0.589	0	0	0.9	0.469	0.918
ADORA1	AGT	4442839	4442719	9606.ENSP00000356205	9606.ENSP00000355627	0	0	0	0	0.152	0.051	0.9	0.108	0.918
TAC1	PTGER1	4439413	4436972	9606.ENSP00000321106	9606.ENSP00000292513	0	0	0	0	0	0	0.9	0.215	0.918
OPRM1	STAT3	4447859	4435468	9606.ENSP00000394624	9606.ENSP00000264657	0	0	0	0	0	0	0.9	0.222	0.918
HRH1	ADRA1A	4446629	4445417	9606.ENSP00000380247	9606.ENSP00000369960	0	0	0	0.671	0	0	0.9	0.576	0.918
SRC	CHRM1	4444215	4438226	9606.ENSP00000362680	9606.ENSP00000306490	0	0	0	0	0	0	0.9	0.216	0.918
AVP	PIK3CA	4445364	4435346	9606.ENSP00000369647	9606.ENSP00000263967	0	0	0	0	0	0	0.9	0.221	0.918
PARP1	SIRT1	4442743	4432849	9606.ENSP00000355759	9606.ENSP00000212015	0	0	0	0	0.061	0.294	0	0.887	0.918
AGT	ADRA2A	4442719	4436361	9606.ENSP00000355627	9606.ENSP00000280155	0	0	0	0	0	0.051	0.9	0.213	0.918
PTK2B	ROCK2	4446690	4439164	9606.ENSP00000380638	9606.ENSP00000317985	0	0	0	0.541	0	0.125	0.9	0.238	0.917
NOS3	SIRT1	4437409	4432849	9606.ENSP00000297494	9606.ENSP00000212015	0.042	0	0	0	0.062	0.379	0	0.868	0.917
AGTR2	ADORA1	4443835	4442839	9606.ENSP00000360973	9606.ENSP00000356205	0	0	0	0	0	0	0.9	0.207	0.917
ITGB3	PIK3CA	4450406	4435346	9606.ENSP00000452786	9606.ENSP00000263967	0	0	0	0	0.064	0	0.9	0.188	0.917
ADRB1	PTGER2	4443292	4433932	9606.ENSP00000358301	9606.ENSP00000245457	0	0	0	0	0.057	0	0.9	0.192	0.917
ADRA2B	AGT	4451505	4442719	9606.ENSP00000480573	9606.ENSP00000355627	0	0	0	0	0	0.051	0.9	0.197	0.917
ITGB3	CASP8	4450406	4442125	9606.ENSP00000452786	9606.ENSP00000351273	0	0	0	0	0.061	0	0.9	0.195	0.917
TNF	MT-CO2	4448041	4442560	9606.ENSP00000398698	9606.ENSP00000354876	0	0	0	0	0	0	0.9	0.211	0.917
SHC1	PIK3R3	4448165	4435132	9606.ENSP00000401303	9606.ENSP00000262741	0	0	0	0	0	0.064	0.9	0.188	0.917
VDR	CYP24A1	4450226	4432987	9606.ENSP00000447173	9606.ENSP00000216862	0	0	0	0	0	0.348	0	0.878	0.917
ADAM17	SHH	4438549	4437380	9606.ENSP00000309968	9606.ENSP00000297261	0	0	0	0	0	0	0.9	0.211	0.917
PSMB9	PTEN	4444464	4443848	9606.ENSP00000363993	9606.ENSP00000361021	0	0	0	0	0	0	0.9	0.198	0.916
ADRA2B	DRD2	4451505	4442557	9606.ENSP00000480573	9606.ENSP00000354859	0	0	0	0.801	0.063	0	0.9	0.764	0.916
ADRA1A	HTR2B	4445417	4434624	9606.ENSP00000369960	9606.ENSP00000258400	0	0	0	0.67	0	0	0.9	0.512	0.916
ADRA2C	HRH3	4447303	4441265	9606.ENSP00000386069	9606.ENSP00000342560	0	0	0	0.741	0.088	0	0.9	0.484	0.916
HIF1A	MAPK1	4449842	4432880	9606.ENSP00000437955	9606.ENSP00000215832	0	0	0	0	0	0.294	0.8	0.455	0.916
VDR	SMARCA4	4450226	4447900	9606.ENSP00000447173	9606.ENSP00000395654	0	0	0	0	0	0.08	0.9	0.169	0.916
MT-CO2	NOS2	4442560	4439909	9606.ENSP00000354876	9606.ENSP00000327251	0	0	0	0	0	0	0.9	0.193	0.915
PIK3CB	IGF1R	4436798	4435797	9606.ENSP00000289153	9606.ENSP00000268035	0	0	0	0	0.062	0.124	0.8	0.548	0.915
ADRA2B	HRH3	4451505	4441265	9606.ENSP00000480573	9606.ENSP00000342560	0	0	0	0.731	0.062	0	0.9	0.53	0.915
PTGS2	TP53	4442894	4435880	9606.ENSP00000356438	9606.ENSP00000269305	0	0	0	0	0	0.379	0	0.869	0.915
DRD2	ADRA2A	4442557	4436361	9606.ENSP00000354859	9606.ENSP00000280155	0	0	0	0.821	0.063	0	0.9	0.767	0.915
SHC1	PIK3CD	4448165	4444876	9606.ENSP00000401303	9606.ENSP00000366563	0	0	0	0	0	0	0.9	0.188	0.915
EDN1	P2RY1	4445200	4438073	9606.ENSP00000368683	9606.ENSP00000304767	0	0	0	0	0	0	0.9	0.19	0.915
HRH3	ADRA2A	4441265	4436361	9606.ENSP00000342560	9606.ENSP00000280155	0	0	0	0.74	0.085	0	0.9	0.476	0.915
NFKB1	SIRT1	4433374	4432849	9606.ENSP00000226574	9606.ENSP00000212015	0	0	0	0	0.061	0.434	0.8	0.298	0.915
PARP1	SMAD4	4442743	4441161	9606.ENSP00000355759	9606.ENSP00000341551	0	0	0	0	0	0	0.9	0.188	0.915
AGTR1	AGTR2	4449040	4443835	9606.ENSP00000419422	9606.ENSP00000360973	0	0	0	0.844	0.062	0	0.9	0.88	0.915
FOS	CRH	4438204	4436231	9606.ENSP00000306245	9606.ENSP00000276571	0	0	0	0	0	0	0	0.915	0.915
HRH1	PIK3R3	4446629	4435132	9606.ENSP00000380247	9606.ENSP00000262741	0	0	0	0	0	0	0.9	0.188	0.915
NOS1	GRIN2B	4451263	4451206	9606.ENSP00000477999	9606.ENSP00000477455	0	0	0	0	0.095	0.181	0.8	0.499	0.915
SP1	CHRM1	4440095	4438226	9606.ENSP00000329357	9606.ENSP00000306490	0	0	0	0	0	0	0.9	0.186	0.915
ESR2	MAPK1	4441379	4432880	9606.ENSP00000343925	9606.ENSP00000215832	0	0	0	0	0	0.399	0.8	0.351	0.915
ADRA2B	PRKCD	4451505	4446312	9606.ENSP00000480573	9606.ENSP00000378217	0	0	0	0	0	0	0.9	0.185	0.915
PIK3CA	IL1B	4435346	4435241	9606.ENSP00000263967	9606.ENSP00000263341	0	0	0	0	0	0	0.9	0.185	0.915
ADRB1	ADORA2B	4443292	4438057	9606.ENSP00000358301	9606.ENSP00000304501	0	0	0	0.723	0	0	0.9	0.543	0.914
ADORA2B	CRH	4438057	4436231	9606.ENSP00000304501	9606.ENSP00000276571	0	0	0	0	0	0	0.9	0.178	0.914
AKT1	JUN	4450372	4443699	9606.ENSP00000451828	9606.ENSP00000360266	0	0	0	0	0	0.072	0	0.91	0.913
EPHX2	NOS2	4449539	4439909	9606.ENSP00000430269	9606.ENSP00000327251	0	0	0	0	0	0	0.9	0.166	0.913
ESR2	PIK3CA	4441379	4435346	9606.ENSP00000343925	9606.ENSP00000263967	0	0	0	0	0	0	0.9	0.168	0.913
AVP	HTR2B	4445364	4434624	9606.ENSP00000369647	9606.ENSP00000258400	0	0	0	0	0	0	0.9	0.169	0.913
COMT	SLC6A4	4442480	4434929	9606.ENSP00000354511	9606.ENSP00000261707	0	0	0	0	0	0	0	0.913	0.913
ADORA1	CX3CR1	4442839	4442101	9606.ENSP00000356205	9606.ENSP00000351059	0	0	0	0	0	0	0.9	0.17	0.913
CHRM1	ADRB2	4438226	4438121	9606.ENSP00000306490	9606.ENSP00000305372	0	0	0	0.681	0.05	0	0.9	0.414	0.913
BDNF	PIK3CA	4448727	4435346	9606.ENSP00000414303	9606.ENSP00000263967	0	0	0	0	0	0	0.9	0.168	0.913
HTR2A	AGT	4449830	4442719	9606.ENSP00000437737	9606.ENSP00000355627	0	0	0	0	0.076	0.051	0.9	0.126	0.913
AGTR2	F2	4443835	4438421	9606.ENSP00000360973	9606.ENSP00000308541	0	0	0	0	0.057	0	0.9	0.161	0.913
EDN1	ANXA1	4445200	4444796	9606.ENSP00000368683	9606.ENSP00000366109	0	0	0	0	0.076	0	0.9	0.137	0.913
ADRB2	ADORA2B	4438121	4438057	9606.ENSP00000305372	9606.ENSP00000304501	0	0	0	0.745	0	0	0.9	0.549	0.913
MT-CO2	COX8A	4442560	4439425	9606.ENSP00000354876	9606.ENSP00000321260	0	0	0	0	0.062	0	0.9	0.154	0.913
PPARA	MT-CO2	4447242	4442560	9606.ENSP00000385523	9606.ENSP00000354876	0	0	0	0	0	0	0.9	0.165	0.912
AGT	C5	4442719	4433289	9606.ENSP00000355627	9606.ENSP00000223642	0	0	0	0	0.114	0	0.9	0.091	0.912
P2RY1	MAPK14	4438073	4433482	9606.ENSP00000304767	9606.ENSP00000229795	0	0	0	0	0	0	0.9	0.157	0.912
PPARA	HSPA1A	4447242	4444600	9606.ENSP00000385523	9606.ENSP00000364802	0	0	0	0	0	0.109	0.9	0.092	0.912
DBH	AOC3	4446100	4438776	9606.ENSP00000376776	9606.ENSP00000312326	0	0	0	0	0.059	0	0.9	0.146	0.912
ADRA1A	CHRM1	4445417	4438226	9606.ENSP00000369960	9606.ENSP00000306490	0	0	0	0.678	0	0	0.9	0.403	0.912
LTA	PSMB9	4448275	4444464	9606.ENSP00000403495	9606.ENSP00000363993	0	0	0	0	0.098	0	0.9	0.108	0.912
ALOX15	ALOX5	4450608	4444382	9606.ENSP00000458832	9606.ENSP00000363512	0	0	0.298	0.905	0.062	0	0.9	0.891	0.912
ANXA1	CX3CR1	4444796	4442101	9606.ENSP00000366109	9606.ENSP00000351059	0	0	0	0	0	0	0.9	0.151	0.911
ADA	ADORA1	4444047	4442839	9606.ENSP00000361965	9606.ENSP00000356205	0	0	0	0	0	0.388	0	0.86	0.911
PRKACA	IGF1R	4438521	4435797	9606.ENSP00000309591	9606.ENSP00000268035	0	0	0	0.576	0.063	0.108	0.9	0.088	0.911
CHRM1	HTR2B	4438226	4434624	9606.ENSP00000306490	9606.ENSP00000258400	0	0	0	0.644	0.052	0	0.9	0.316	0.911
OPRM1	HRH3	4447859	4441265	9606.ENSP00000394624	9606.ENSP00000342560	0	0	0	0.577	0	0	0.9	0.31	0.911
ANXA1	F2	4444796	4438421	9606.ENSP00000366109	9606.ENSP00000308541	0	0	0	0	0	0.055	0.9	0.143	0.911
PIK3CB	PIK3CA	4436798	4435346	9606.ENSP00000289153	9606.ENSP00000263967	0	0	0	0.886	0.062	0	0.9	0.809	0.911
SHC1	AGT	4448165	4442719	9606.ENSP00000401303	9606.ENSP00000355627	0	0	0	0	0	0	0.9	0.156	0.911
ITGB3	ROCK2	4450406	4439164	9606.ENSP00000452786	9606.ENSP00000317985	0	0	0	0	0	0.08	0.9	0.111	0.911
AVP	ADORA2B	4445364	4438057	9606.ENSP00000369647	9606.ENSP00000304501	0	0	0	0	0	0	0.9	0.14	0.91
P2RY1	HTR2B	4438073	4434624	9606.ENSP00000304767	9606.ENSP00000258400	0	0	0	0.567	0	0.064	0.9	0.226	0.91
CHRM1	P2RY1	4438226	4438073	9606.ENSP00000306490	9606.ENSP00000304767	0	0	0	0	0.05	0	0.9	0.13	0.91
F2	ADRB2	4438421	4438121	9606.ENSP00000308541	9606.ENSP00000305372	0	0	0	0	0	0	0.9	0.143	0.91
NR1H3	SREBF1	4451232	4441794	9606.ENSP00000477707	9606.ENSP00000348069	0	0	0	0	0.061	0.373	0	0.86	0.91
HRH1	CHRM1	4446629	4438226	9606.ENSP00000380247	9606.ENSP00000306490	0	0	0	0.756	0.062	0	0.9	0.392	0.91
NOS1	GRIN1	4451263	4443769	9606.ENSP00000477999	9606.ENSP00000360608	0	0	0	0	0.062	0.185	0.8	0.485	0.91
COMT	AOC3	4442480	4438776	9606.ENSP00000354511	9606.ENSP00000312326	0	0	0	0	0	0	0.9	0.127	0.909
AKT1	NOS2	4450372	4439909	9606.ENSP00000451828	9606.ENSP00000327251	0	0	0	0	0.063	0.065	0.8	0.543	0.909
AGT	DRD2	4442719	4442557	9606.ENSP00000355627	9606.ENSP00000354859	0	0	0	0	0.067	0.051	0.9	0.098	0.909
FGF1	PIK3CA	4451524	4435346	9606.ENSP00000480791	9606.ENSP00000263967	0	0	0	0	0	0	0.9	0.129	0.909
HRH1	AVP	4446629	4445364	9606.ENSP00000380247	9606.ENSP00000369647	0	0	0	0	0.055	0	0.9	0.123	0.909
AGT	CHRM1	4442719	4438226	9606.ENSP00000355627	9606.ENSP00000306490	0	0	0	0	0.135	0	0.9	0	0.909
SERPINF2	TGFB1	4439481	4433189	9606.ENSP00000321853	9606.ENSP00000221930	0	0	0	0	0.069	0	0.9	0.104	0.909
PPARA	RB1	4447242	4435747	9606.ENSP00000385523	9606.ENSP00000267163	0	0	0	0	0	0.055	0.9	0.123	0.909
SP1	PIK3CA	4440095	4435346	9606.ENSP00000329357	9606.ENSP00000263967	0	0	0	0	0.048	0.078	0.9	0.084	0.908
PIK3CD	PIK3CA	4444876	4435346	9606.ENSP00000366563	9606.ENSP00000263967	0	0	0	0.892	0.061	0	0.9	0.597	0.908
RELA	NGFR	4447098	4432715	9606.ENSP00000384273	9606.ENSP00000172229	0	0	0	0	0	0	0.9	0.124	0.908
P4HB	PROC	4439955	4433614	9606.ENSP00000327801	9606.ENSP00000234071	0	0	0	0	0.061	0.05	0.9	0.098	0.908
HTR2A	F2	4449830	4438421	9606.ENSP00000437737	9606.ENSP00000308541	0	0	0	0	0	0	0.9	0.125	0.908
ADRA2C	PRKCD	4447303	4446312	9606.ENSP00000386069	9606.ENSP00000378217	0	0	0	0	0	0	0.9	0.127	0.908
HTR2A	HTR2B	4449830	4434624	9606.ENSP00000437737	9606.ENSP00000258400	0	0	0	0.906	0	0	0.9	0.9	0.908
PPARA	F2	4447242	4438421	9606.ENSP00000385523	9606.ENSP00000308541	0	0	0	0	0.063	0	0.9	0.106	0.908
AGTR1	C5	4449040	4433289	9606.ENSP00000419422	9606.ENSP00000223642	0	0	0	0	0.062	0	0.9	0.107	0.908
APRT	PDE1B	4445041	4433839	9606.ENSP00000367615	9606.ENSP00000243052	0	0	0	0	0	0	0.9	0.114	0.907
ANXA1	PIK3CA	4444796	4435346	9606.ENSP00000366109	9606.ENSP00000263967	0	0	0	0	0	0	0.9	0.113	0.907
PIK3CD	CSF2	4444876	4437349	9606.ENSP00000366563	9606.ENSP00000296871	0	0	0	0	0	0	0.9	0.111	0.907
PIK3CD	PIK3CG	4444876	4442215	9606.ENSP00000366563	9606.ENSP00000352121	0	0	0	0.801	0.105	0.441	0.8	0.737	0.907
HTR2A	SLC6A4	4449830	4434929	9606.ENSP00000437737	9606.ENSP00000261707	0	0	0	0	0	0.073	0	0.904	0.907
AKT1	MAPK3	4450372	4435180	9606.ENSP00000451828	9606.ENSP00000263025	0	0	0.323	0.586	0.064	0.146	0.8	0.946	0.907
JUN	CHRM1	4443699	4438226	9606.ENSP00000360266	9606.ENSP00000306490	0	0	0	0	0	0	0.9	0.115	0.907
NOS3	CALM3	4437409	4436903	9606.ENSP00000297494	9606.ENSP00000291295	0	0	0	0	0	0.848	0	0.415	0.907
AGTR2	DRD2	4443835	4442557	9606.ENSP00000360973	9606.ENSP00000354859	0	0	0	0.581	0	0	0.9	0.219	0.907
HRH1	PTGER1	4446629	4436972	9606.ENSP00000380247	9606.ENSP00000292513	0	0	0	0	0	0	0.9	0.112	0.907
HRH2	ADRB1	4444864	4443292	9606.ENSP00000366506	9606.ENSP00000358301	0	0	0	0.808	0	0	0.9	0.397	0.907
AVP	CHRM1	4445364	4438226	9606.ENSP00000369647	9606.ENSP00000306490	0	0	0	0	0.055	0	0.9	0.104	0.907
RELA	PAWR	4447098	4439982	9606.ENSP00000384273	9606.ENSP00000328088	0	0	0	0	0.045	0	0.9	0.11	0.907
HRH2	ADRB2	4444864	4438121	9606.ENSP00000366506	9606.ENSP00000305372	0	0	0	0.81	0	0	0.9	0.442	0.907
AGTR1	PTGER1	4449040	4436972	9606.ENSP00000419422	9606.ENSP00000292513	0	0	0	0	0	0	0.9	0.114	0.907
AVP	ANXA1	4445364	4444796	9606.ENSP00000369647	9606.ENSP00000366109	0	0	0	0	0	0	0.9	0.11	0.907
CALCA	PTGER2	4440295	4433932	9606.ENSP00000331746	9606.ENSP00000245457	0	0	0	0	0	0	0.9	0.112	0.907
TP53	PIK3CA	4435880	4435346	9606.ENSP00000269305	9606.ENSP00000263967	0	0	0	0	0	0.06	0	0.904	0.907
NR1H3	SP1	4451232	4440095	9606.ENSP00000477707	9606.ENSP00000329357	0	0	0	0	0	0.111	0.9	0.041	0.907
VDR	GC	4450226	4449184	9606.ENSP00000447173	9606.ENSP00000421725	0	0	0	0	0.062	0.057	0	0.902	0.906
AGTR2	CHRM1	4443835	4438226	9606.ENSP00000360973	9606.ENSP00000306490	0	0	0	0	0.062	0	0.9	0.08	0.906
CASP8	ATM	4442125	4436300	9606.ENSP00000351273	9606.ENSP00000278616	0	0	0	0	0	0	0.8	0.551	0.906
PTGS2	NOS2	4442894	4439909	9606.ENSP00000356438	9606.ENSP00000327251	0	0	0	0	0.063	0.299	0	0.868	0.906
ADRA2C	ADRA2A	4447303	4436361	9606.ENSP00000386069	9606.ENSP00000280155	0	0	0	0.938	0.061	0	0.9	0.81	0.906
COL5A1	CASP8	4443819	4442125	9606.ENSP00000360882	9606.ENSP00000351273	0	0	0	0	0	0	0.9	0.106	0.906
COL5A1	P4HB	4443819	4439955	9606.ENSP00000360882	9606.ENSP00000327801	0	0	0	0	0.07	0	0.9	0.077	0.906
AR	PRKACA	4444436	4438521	9606.ENSP00000363822	9606.ENSP00000309591	0	0	0	0	0	0	0.9	0.105	0.906
ANXA1	AGT	4444796	4442719	9606.ENSP00000366109	9606.ENSP00000355627	0	0	0	0	0	0	0.9	0.108	0.906
APRT	PDE11A	4445041	4436657	9606.ENSP00000367615	9606.ENSP00000286063	0	0	0	0	0	0	0.9	0.106	0.906
HTR2A	AGTR1	4449830	4449040	9606.ENSP00000437737	9606.ENSP00000419422	0	0	0	0.587	0	0	0.9	0.187	0.906
AGTR1	HRH1	4449040	4446629	9606.ENSP00000419422	9606.ENSP00000380247	0	0	0	0.57	0	0	0.9	0.188	0.906
EDN1	CHRM1	4445200	4438226	9606.ENSP00000368683	9606.ENSP00000306490	0	0	0	0	0	0	0.9	0.097	0.905
AVP	P2RY1	4445364	4438073	9606.ENSP00000369647	9606.ENSP00000304767	0	0	0	0	0	0	0.9	0.091	0.905
PIK3CD	PIK3CB	4444876	4436798	9606.ENSP00000366563	9606.ENSP00000289153	0	0	0	0.957	0.061	0	0.9	0.773	0.905
CSF2	PIK3CA	4437349	4435346	9606.ENSP00000296871	9606.ENSP00000263967	0	0	0	0	0	0	0.9	0.093	0.905
ADORA1	C5	4442839	4433289	9606.ENSP00000356205	9606.ENSP00000223642	0	0	0	0	0	0	0.9	0.097	0.905
PDE1A	PDE1B	4448547	4433839	9606.ENSP00000410309	9606.ENSP00000243052	0	0	0	0.959	0.059	0	0.9	0.826	0.905
NFKB1	NGFR	4433374	4432715	9606.ENSP00000226574	9606.ENSP00000172229	0	0	0	0	0	0	0.9	0.092	0.905
AVP	PTGER1	4445364	4436972	9606.ENSP00000369647	9606.ENSP00000292513	0	0	0	0	0	0	0.9	0.096	0.905
HIF1A	PSMB9	4449842	4444464	9606.ENSP00000437955	9606.ENSP00000363993	0	0	0	0	0	0	0.9	0.089	0.905
OPRM1	CX3CR1	4447859	4442101	9606.ENSP00000394624	9606.ENSP00000351059	0	0	0	0.678	0	0	0.9	0.214	0.905
ADRA2B	ADRA2C	4451505	4447303	9606.ENSP00000480573	9606.ENSP00000386069	0	0	0	0.929	0	0	0.9	0.801	0.905
EDN1	PIK3CA	4445200	4435346	9606.ENSP00000368683	9606.ENSP00000263967	0	0	0	0	0	0	0.9	0.09	0.905
SMARCA4	ESR2	4447900	4441379	9606.ENSP00000395654	9606.ENSP00000343925	0	0	0	0	0	0.08	0.9	0.056	0.905
CTNNB1	GRIA2	4441426	4437302	9606.ENSP00000344456	9606.ENSP00000296526	0	0	0	0	0	0.05	0.9	0.089	0.905
HRH1	F2	4446629	4438421	9606.ENSP00000380247	9606.ENSP00000308541	0	0	0	0	0	0	0.9	0.098	0.905
ADRA1A	ANXA1	4445417	4444796	9606.ENSP00000369960	9606.ENSP00000366109	0	0	0	0	0	0	0.9	0.09	0.905
KAT5	SIRT1	4441035	4432849	9606.ENSP00000340330	9606.ENSP00000212015	0	0	0	0	0.063	0.472	0	0.822	0.905
ADRA1A	F2	4445417	4438421	9606.ENSP00000369960	9606.ENSP00000308541	0	0	0	0	0.063	0	0.9	0.074	0.905
AVP	HRH2	4445364	4444864	9606.ENSP00000369647	9606.ENSP00000366506	0	0	0	0	0	0	0.9	0.093	0.905
HSPA4	HSPB2	4437917	4437856	9606.ENSP00000302961	9606.ENSP00000302476	0	0	0	0	0.061	0.082	0	0.899	0.905
RELA	MT-CO2	4447098	4442560	9606.ENSP00000384273	9606.ENSP00000354876	0	0	0	0	0	0	0.9	0.094	0.905
AGTR1	OPRM1	4449040	4447859	9606.ENSP00000419422	9606.ENSP00000394624	0	0	0	0.753	0	0	0.9	0.268	0.905
AGT	HRH3	4442719	4441265	9606.ENSP00000355627	9606.ENSP00000342560	0	0	0	0	0.088	0.051	0.9	0	0.905
ADRA2B	ADRA2A	4451505	4436361	9606.ENSP00000480573	9606.ENSP00000280155	0	0	0	0.933	0	0	0.9	0.787	0.905
ANXA1	TAC1	4444796	4439413	9606.ENSP00000366109	9606.ENSP00000321106	0	0	0	0	0	0	0.9	0.089	0.905
AKT1	MAPK1	4450372	4432880	9606.ENSP00000451828	9606.ENSP00000215832	0	0	0.304	0.592	0.066	0.146	0.8	0.948	0.905
PRKCD	MPO	4446312	4433305	9606.ENSP00000378217	9606.ENSP00000225275	0	0	0	0	0	0.064	0.9	0.069	0.905
AGTR1	CHRM1	4449040	4438226	9606.ENSP00000419422	9606.ENSP00000306490	0	0	0	0.583	0	0	0.9	0.145	0.904
CSF2	PIK3CB	4437349	4436798	9606.ENSP00000296871	9606.ENSP00000289153	0	0	0	0	0	0	0.9	0.087	0.904
OPRM1	AGTR2	4447859	4443835	9606.ENSP00000394624	9606.ENSP00000360973	0	0	0	0.717	0	0	0.9	0.186	0.904
CAV1	RIPK1	4440933	4434726	9606.ENSP00000339191	9606.ENSP00000259808	0	0	0	0	0	0.057	0.9	0.072	0.904
SPIDR	ATM	4437401	4436300	9606.ENSP00000297423	9606.ENSP00000278616	0	0	0	0	0	0	0.9	0.088	0.904
ESR2	PIK3R3	4441379	4435132	9606.ENSP00000343925	9606.ENSP00000262741	0	0	0	0	0	0.081	0.9	0.046	0.904
CALM1	PDE1B	4441930	4433839	9606.ENSP00000349467	9606.ENSP00000243052	0	0	0	0	0.085	0.72	0.6	0.177	0.904
CX3CR1	C5	4442101	4433289	9606.ENSP00000351059	9606.ENSP00000223642	0	0	0	0	0	0	0.9	0.083	0.904
AGTR1	ANXA1	4449040	4444796	9606.ENSP00000419422	9606.ENSP00000366109	0	0	0	0	0.055	0	0.9	0.067	0.904
MT-CO2	MPO	4442560	4433305	9606.ENSP00000354876	9606.ENSP00000225275	0	0	0	0	0	0	0.9	0.087	0.904
AGT	CX3CR1	4442719	4442101	9606.ENSP00000355627	9606.ENSP00000351059	0	0	0	0	0.062	0	0.9	0.063	0.904
PTGER1	HTR2B	4436972	4434624	9606.ENSP00000292513	9606.ENSP00000258400	0	0	0	0	0	0	0.9	0.085	0.904
SERPINF2	PROC	4439481	4433614	9606.ENSP00000321853	9606.ENSP00000234071	0	0	0	0	0.395	0.129	0.8	0.2	0.904
SP1	NOS2	4440095	4439909	9606.ENSP00000329357	9606.ENSP00000327251	0	0	0	0	0	0	0.9	0.08	0.904
ALOX15	CYP3A4	4450608	4440831	9606.ENSP00000458832	9606.ENSP00000337915	0	0	0	0	0	0	0.9	0.087	0.904
AGT	P2RY1	4442719	4438073	9606.ENSP00000355627	9606.ENSP00000304767	0	0	0	0	0	0	0.9	0.086	0.904
TP53	IGF1R	4435880	4435797	9606.ENSP00000269305	9606.ENSP00000268035	0	0	0	0	0	0.311	0	0.867	0.904
CHRM1	PAK1	4438226	4436295	9606.ENSP00000306490	9606.ENSP00000278568	0	0	0	0	0.062	0	0.9	0.065	0.904
HTR2A	PTGER1	4449830	4436972	9606.ENSP00000437737	9606.ENSP00000292513	0	0	0	0	0	0	0.9	0.08	0.904
RELA	TGFB2	4447098	4442765	9606.ENSP00000384273	9606.ENSP00000355896	0	0	0	0	0	0	0.9	0.079	0.903
AGT	PIK3R3	4442719	4435132	9606.ENSP00000355627	9606.ENSP00000262741	0	0	0	0	0.061	0	0.9	0.059	0.903
ANXA1	C5	4444796	4433289	9606.ENSP00000366109	9606.ENSP00000223642	0	0	0	0	0	0	0.9	0.078	0.903
APRT	PDE4D	4445041	4441530	9606.ENSP00000367615	9606.ENSP00000345502	0	0	0	0	0	0	0.9	0.079	0.903
AGTR1	P2RY1	4449040	4438073	9606.ENSP00000419422	9606.ENSP00000304767	0	0	0	0.716	0	0.064	0.9	0.087	0.903
F2	PIK3CA	4438421	4435346	9606.ENSP00000308541	9606.ENSP00000263967	0	0	0	0	0	0	0.9	0.074	0.903
HRH1	ANXA1	4446629	4444796	9606.ENSP00000380247	9606.ENSP00000366109	0	0	0	0	0.076	0	0.9	0	0.903
AGTR2	PIK3CA	4443835	4435346	9606.ENSP00000360973	9606.ENSP00000263967	0	0	0	0	0	0.05	0.9	0.069	0.903
HRH2	CRH	4444864	4436231	9606.ENSP00000366506	9606.ENSP00000276571	0	0	0	0	0	0	0.9	0.071	0.903
ESR2	MAPK3	4441379	4435180	9606.ENSP00000343925	9606.ENSP00000263025	0	0	0	0	0	0.073	0.8	0.523	0.903
HRH2	ADORA2B	4444864	4438057	9606.ENSP00000366506	9606.ENSP00000304501	0	0	0	0.75	0	0	0.9	0.167	0.903
PIK3CA	NGFR	4435346	4432715	9606.ENSP00000263967	9606.ENSP00000172229	0	0	0	0	0	0	0.9	0.064	0.902
CX3CR1	HRH3	4442101	4441265	9606.ENSP00000351059	9606.ENSP00000342560	0	0	0	0	0	0	0.9	0.067	0.902
ANXA1	P2RY1	4444796	4438073	9606.ENSP00000366109	9606.ENSP00000304767	0	0	0	0	0.061	0	0.9	0	0.902
AGT	HTR2B	4442719	4434624	9606.ENSP00000355627	9606.ENSP00000258400	0	0	0	0	0	0.051	0.9	0.051	0.902
PDE1A	APRT	4448547	4445041	9606.ENSP00000410309	9606.ENSP00000367615	0	0	0	0	0	0	0.9	0.061	0.902
GRIA2	JUND	4437302	4434256	9606.ENSP00000296526	9606.ENSP00000252818	0	0	0	0	0	0	0.9	0.068	0.902
AR	TP53	4444436	4435880	9606.ENSP00000363822	9606.ENSP00000269305	0	0	0	0	0	0.379	0	0.848	0.902
AGTR1	PIK3CA	4449040	4435346	9606.ENSP00000419422	9606.ENSP00000263967	0	0	0	0	0	0.05	0.9	0.053	0.902
TGFB2	SERPINF2	4442765	4439481	9606.ENSP00000355896	9606.ENSP00000321853	0	0	0	0	0	0	0.9	0.064	0.902
ADRA2C	CX3CR1	4447303	4442101	9606.ENSP00000386069	9606.ENSP00000351059	0	0	0	0	0	0	0.9	0.065	0.902
CHRM1	PTGER1	4438226	4436972	9606.ENSP00000306490	9606.ENSP00000292513	0	0	0	0	0	0	0.9	0.062	0.902
P2RY1	PIK3R3	4438073	4435132	9606.ENSP00000304767	9606.ENSP00000262741	0	0	0	0	0	0	0.9	0.062	0.902
ADRA1A	PIK3R3	4445417	4435132	9606.ENSP00000369960	9606.ENSP00000262741	0	0	0	0	0	0.057	0.9	0.047	0.902
HRH2	PTGER2	4444864	4433932	9606.ENSP00000366506	9606.ENSP00000245457	0	0	0	0	0.064	0	0.9	0	0.902
CX3CR1	ADRA2A	4442101	4436361	9606.ENSP00000351059	9606.ENSP00000280155	0	0	0	0.565	0	0	0.9	0.073	0.901
PRKCD	SHH	4446312	4437380	9606.ENSP00000378217	9606.ENSP00000297261	0	0	0	0	0	0	0.9	0.051	0.901
OPRM1	AGT	4447859	4442719	9606.ENSP00000394624	9606.ENSP00000355627	0	0	0	0	0	0.051	0.9	0	0.901
DRD2	CX3CR1	4442557	4442101	9606.ENSP00000354859	9606.ENSP00000351059	0	0	0	0.567	0	0	0.9	0.074	0.901
PSMB9	CTNNB1	4444464	4441426	9606.ENSP00000363993	9606.ENSP00000344456	0	0	0	0	0	0	0.9	0.051	0.901
P4HB	SHH	4439955	4437380	9606.ENSP00000327801	9606.ENSP00000297261	0	0	0	0	0.049	0	0.9	0.049	0.901
F2	PTGER1	4438421	4436972	9606.ENSP00000308541	9606.ENSP00000292513	0	0	0	0	0	0	0.9	0.055	0.901
AGTR2	C5	4443835	4433289	9606.ENSP00000360973	9606.ENSP00000223642	0	0	0	0	0.055	0	0.9	0.041	0.901
FGF1	PIK3CB	4451524	4436798	9606.ENSP00000480791	9606.ENSP00000289153	0	0	0	0	0	0	0.9	0.055	0.901
AGTR1	PIK3R3	4449040	4435132	9606.ENSP00000419422	9606.ENSP00000262741	0	0	0	0	0	0.057	0.9	0	0.901
ANXA1	HRH3	4444796	4441265	9606.ENSP00000366109	9606.ENSP00000342560	0	0	0	0	0.052	0	0.9	0	0.901
MT-CO2	SP1	4442560	4440095	9606.ENSP00000354876	9606.ENSP00000329357	0	0	0	0	0.053	0	0.9	0.041	0.901
AGTR2	PTGER1	4443835	4436972	9606.ENSP00000360973	9606.ENSP00000292513	0	0	0	0	0	0	0.9	0.056	0.901
ADRA2B	CX3CR1	4451505	4442101	9606.ENSP00000480573	9606.ENSP00000351059	0	0	0	0.573	0	0	0.9	0.07	0.901
PTGER1	PIK3R3	4436972	4435132	9606.ENSP00000292513	9606.ENSP00000262741	0	0	0	0	0	0.057	0.9	0	0.901
PIK3R3	HTR2B	4435132	4434624	9606.ENSP00000262741	9606.ENSP00000258400	0	0	0	0	0	0.057	0.9	0	0.901
SLC8A1	PRKACA	4447160	4438521	9606.ENSP00000384763	9606.ENSP00000309591	0	0	0	0	0.066	0.509	0.8	0.057	0.901
F2	HTR2B	4438421	4434624	9606.ENSP00000308541	9606.ENSP00000258400	0	0	0	0	0	0	0.9	0.057	0.901
HTR2A	PIK3R3	4449830	4435132	9606.ENSP00000437737	9606.ENSP00000262741	0	0	0	0	0	0.057	0.9	0	0.901
ADRA2A	C5	4436361	4433289	9606.ENSP00000280155	9606.ENSP00000223642	0	0	0	0	0	0	0.9	0	0.9
HSPA1A	RB1	4444600	4435747	9606.ENSP00000364802	9606.ENSP00000267163	0	0	0	0	0	0	0.9	0.05	0.9
ANXA1	ADORA1	4444796	4442839	9606.ENSP00000366109	9606.ENSP00000356205	0	0	0	0	0	0	0.9	0.045	0.9
DRD2	C5	4442557	4433289	9606.ENSP00000354859	9606.ENSP00000223642	0	0	0	0	0	0	0.9	0	0.9
PDE1C	APRT	4446517	4445041	9606.ENSP00000379496	9606.ENSP00000367615	0	0	0	0	0	0	0.9	0.05	0.9
ANXA1	PTGER1	4444796	4436972	9606.ENSP00000366109	9606.ENSP00000292513	0	0	0	0	0	0	0.9	0.047	0.9
CSF2	PIK3R3	4437349	4435132	9606.ENSP00000296871	9606.ENSP00000262741	0	0	0	0	0	0	0.9	0.045	0.9
ADRA1A	PIK3CA	4445417	4435346	9606.ENSP00000369960	9606.ENSP00000263967	0	0	0	0	0	0.05	0.9	0	0.9
OPRM1	ANXA1	4447859	4444796	9606.ENSP00000394624	9606.ENSP00000366109	0	0	0	0	0	0	0.9	0.041	0.9
AVP	PIK3R3	4445364	4435132	9606.ENSP00000369647	9606.ENSP00000262741	0	0	0	0	0	0	0.9	0	0.9
AGT	PIK3CA	4442719	4435346	9606.ENSP00000355627	9606.ENSP00000263967	0	0	0	0	0	0	0.9	0	0.9
CTNNB1	PROC	4441426	4433614	9606.ENSP00000344456	9606.ENSP00000234071	0	0	0	0	0	0	0.9	0	0.9
OPRM1	C5	4447859	4433289	9606.ENSP00000394624	9606.ENSP00000223642	0	0	0	0	0	0	0.9	0.046	0.9
PTGER1	PIK3CA	4436972	4435346	9606.ENSP00000292513	9606.ENSP00000263967	0	0	0	0	0	0.05	0.9	0.041	0.9
SMAD4	PROC	4441161	4433614	9606.ENSP00000341551	9606.ENSP00000234071	0	0	0	0	0	0	0.9	0	0.9
ADRA2C	ANXA1	4447303	4444796	9606.ENSP00000386069	9606.ENSP00000366109	0	0	0	0	0	0	0.9	0	0.9
AGTR2	CX3CR1	4443835	4442101	9606.ENSP00000360973	9606.ENSP00000351059	0	0	0	0.766	0	0	0.9	0.046	0.9
TAC1	PIK3CA	4439413	4435346	9606.ENSP00000321106	9606.ENSP00000263967	0	0	0	0	0	0	0.9	0	0.9
SHC1	AGTR2	4448165	4443835	9606.ENSP00000401303	9606.ENSP00000360973	0	0	0	0	0	0	0.9	0.047	0.9
F2	PIK3R3	4438421	4435132	9606.ENSP00000308541	9606.ENSP00000262741	0	0	0	0	0	0	0.9	0	0.9
ADRA2B	C5	4451505	4433289	9606.ENSP00000480573	9606.ENSP00000223642	0	0	0	0	0	0	0.9	0	0.9
ANXA1	ADRA2A	4444796	4436361	9606.ENSP00000366109	9606.ENSP00000280155	0	0	0	0	0	0	0.9	0.049	0.9
AVP	PTGER2	4445364	4433932	9606.ENSP00000369647	9606.ENSP00000245457	0	0	0	0	0	0	0.9	0	0.9
PIK3CA	HTR2B	4435346	4434624	9606.ENSP00000263967	9606.ENSP00000258400	0	0	0	0	0	0.05	0.9	0	0.9
CRH	NR3C1	4436231	4433539	9606.ENSP00000276571	9606.ENSP00000231509	0	0	0	0	0	0	0	0.899	0.9
PRKACA	CSF2	4438521	4437349	9606.ENSP00000309591	9606.ENSP00000296871	0	0	0	0	0	0	0.9	0	0.9
KAT5	SPIDR	4441035	4437401	9606.ENSP00000340330	9606.ENSP00000297423	0	0	0	0	0	0	0.9	0	0.9
PRKACA	NOS3	4438521	4437409	9606.ENSP00000309591	9606.ENSP00000297494	0	0	0	0	0	0	0.9	0.048	0.9
ANXA1	AGTR2	4444796	4443835	9606.ENSP00000366109	9606.ENSP00000360973	0	0	0	0	0	0	0.9	0.041	0.9
SMAD3	PROC	4440414	4433614	9606.ENSP00000332973	9606.ENSP00000234071	0	0	0	0	0	0	0.9	0	0.9
HRH1	AGT	4446629	4442719	9606.ENSP00000380247	9606.ENSP00000355627	0	0	0	0	0	0	0.9	0.042	0.9
ADRA2B	ANXA1	4451505	4444796	9606.ENSP00000480573	9606.ENSP00000366109	0	0	0	0	0	0	0.9	0	0.9
HTR2A	PIK3CA	4449830	4435346	9606.ENSP00000437737	9606.ENSP00000263967	0	0	0	0	0	0.05	0.9	0	0.9
F2	CHRM1	4438421	4438226	9606.ENSP00000308541	9606.ENSP00000306490	0	0	0	0	0	0	0.9	0	0.9
ANXA1	HTR2B	4444796	4434624	9606.ENSP00000366109	9606.ENSP00000258400	0	0	0	0	0	0	0.9	0	0.9
ADRA2C	C5	4447303	4433289	9606.ENSP00000386069	9606.ENSP00000223642	0	0	0	0	0	0	0.9	0	0.9
HTR2A	ANXA1	4449830	4444796	9606.ENSP00000437737	9606.ENSP00000366109	0	0	0	0	0	0	0.9	0	0.9
PRKCD	PIK3CB	4446312	4436798	9606.ENSP00000378217	9606.ENSP00000289153	0	0	0	0	0.064	0.459	0.8	0.129	0.9
CHRM1	PIK3CA	4438226	4435346	9606.ENSP00000306490	9606.ENSP00000263967	0	0	0	0	0	0	0.9	0	0.9
PSMB9	SHH	4444464	4437380	9606.ENSP00000363993	9606.ENSP00000297261	0	0	0	0	0	0	0.9	0	0.9
P2RY1	PIK3CA	4438073	4435346	9606.ENSP00000304767	9606.ENSP00000263967	0	0	0	0	0	0	0.9	0	0.9
CHRM1	PIK3R3	4438226	4435132	9606.ENSP00000306490	9606.ENSP00000262741	0	0	0	0	0	0	0.9	0	0.9
TAC1	PIK3R3	4439413	4435132	9606.ENSP00000321106	9606.ENSP00000262741	0	0	0	0	0	0	0.9	0	0.9
ANXA1	PIK3R3	4444796	4435132	9606.ENSP00000366109	9606.ENSP00000262741	0	0	0	0	0	0	0.9	0	0.9
VCAM1	SELP	4437090	4435297	9606.ENSP00000294728	9606.ENSP00000263686	0	0	0	0	0.088	0	0	0.894	0.9
ANXA1	DRD2	4444796	4442557	9606.ENSP00000366109	9606.ENSP00000354859	0	0	0	0	0	0	0.9	0	0.9
HRH3	C5	4441265	4433289	9606.ENSP00000342560	9606.ENSP00000223642	0	0	0	0	0	0	0.9	0	0.9
ADAM10	PROC	4434780	4433614	9606.ENSP00000260408	9606.ENSP00000234071	0	0	0	0	0	0	0.9	0.046	0.9
AGTR2	HRH3	4443835	4441265	9606.ENSP00000360973	9606.ENSP00000342560	0	0	0	0	0	0	0.9	0	0.9
ANXA1	CHRM1	4444796	4438226	9606.ENSP00000366109	9606.ENSP00000306490	0	0	0	0	0	0	0.9	0	0.9
PAWR	NFKB1	4439982	4433374	9606.ENSP00000328088	9606.ENSP00000226574	0	0	0	0	0	0	0.9	0	0.9
HRH1	PIK3CA	4446629	4435346	9606.ENSP00000380247	9606.ENSP00000263967	0	0	0	0	0	0	0.9	0	0.9
CRP	SERPINE1	4434405	4433266	9606.ENSP00000255030	9606.ENSP00000223095	0	0	0	0	0.049	0	0	0.898	0.899
NAMPT	SIRT1	4433236	4432849	9606.ENSP00000222553	9606.ENSP00000212015	0.074	0	0	0	0	0.085	0	0.889	0.899
TNF	CRP	4448041	4434405	9606.ENSP00000398698	9606.ENSP00000255030	0	0	0	0	0	0	0	0.899	0.899
ADA	ADORA2B	4444047	4438057	9606.ENSP00000361965	9606.ENSP00000304501	0	0	0	0	0	0.388	0	0.839	0.897
ADA	ADORA2A	4444047	4440713	9606.ENSP00000361965	9606.ENSP00000336630	0	0	0	0	0	0.388	0	0.839	0.897
SMARCA4	RB1	4447900	4435747	9606.ENSP00000395654	9606.ENSP00000267163	0	0	0	0	0.062	0.472	0.72	0.329	0.894
PARP1	ATM	4442743	4436300	9606.ENSP00000355759	9606.ENSP00000278616	0	0	0	0	0.063	0.379	0	0.832	0.893
SRC	SP1	4444215	4440095	9606.ENSP00000362680	9606.ENSP00000329357	0	0	0	0	0.055	0.145	0.8	0.412	0.892
PRKACA	FOS	4438521	4438204	9606.ENSP00000309591	9606.ENSP00000306245	0	0	0	0	0	0.462	0.8	0.079	0.892
IL10	TLR3	4448642	4437339	9606.ENSP00000412237	9606.ENSP00000296795	0	0	0	0	0	0.157	0	0.875	0.891
SRC	PTEN	4444215	4443848	9606.ENSP00000362680	9606.ENSP00000361021	0	0	0	0	0.061	0.261	0	0.856	0.891
CSF2	IL1B	4437349	4435241	9606.ENSP00000296871	9606.ENSP00000263341	0	0	0	0	0.134	0	0	0.879	0.891
SMARCA4	TP53	4447900	4435880	9606.ENSP00000395654	9606.ENSP00000269305	0	0	0	0	0.062	0.472	0	0.796	0.89
CTNNB1	POU5F1	4441426	4434735	9606.ENSP00000344456	9606.ENSP00000259915	0	0	0	0	0.049	0.454	0	0.805	0.89
PTGS2	PTGS1	4442894	4442503	9606.ENSP00000356438	9606.ENSP00000354612	0	0	0.432	0.967	0.14	0.379	0.8	0.956	0.889
MAPK14	MAPK1	4433482	4432880	9606.ENSP00000229795	9606.ENSP00000215832	0	0	0.412	0.926	0.1	0.379	0.8	0.92	0.889
ATP1A2	CACNA1A	4442474	4442347	9606.ENSP00000354490	9606.ENSP00000353362	0	0	0	0	0.211	0.176	0	0.841	0.888
PARP1	TP53	4442743	4435880	9606.ENSP00000355759	9606.ENSP00000269305	0	0	0	0	0.062	0.379	0	0.82	0.886
NOS1	MAPK3	4451263	4435180	9606.ENSP00000477999	9606.ENSP00000263025	0	0	0	0	0.05	0	0.8	0.45	0.886
IGF1R	STAT3	4435797	4435468	9606.ENSP00000268035	9606.ENSP00000264657	0	0	0	0	0	0.555	0	0.755	0.886
PTGS2	PTGER1	4442894	4436972	9606.ENSP00000356438	9606.ENSP00000292513	0	0	0	0	0	0.454	0	0.794	0.883
CALM2	KCNN4	4436014	4435156	9606.ENSP00000272298	9606.ENSP00000262888	0	0	0	0	0	0.857	0	0.218	0.883
CACNA1A	CALM1	4442347	4441930	9606.ENSP00000353362	9606.ENSP00000349467	0	0	0	0	0.116	0.803	0	0.385	0.883
JUN	ESR2	4443699	4441379	9606.ENSP00000360266	9606.ENSP00000343925	0	0	0	0	0	0.082	0.8	0.412	0.882
NOS1	CALM3	4451263	4436903	9606.ENSP00000477999	9606.ENSP00000291295	0	0	0	0	0.058	0.796	0	0.435	0.882
HSPA4	TP53	4437917	4435880	9606.ENSP00000302961	9606.ENSP00000269305	0	0	0	0	0.064	0.432	0	0.794	0.881
AKT1	HSPA4	4450372	4437917	9606.ENSP00000451828	9606.ENSP00000302961	0	0	0	0	0	0.417	0	0.804	0.881
PTEN	ATM	4443848	4436300	9606.ENSP00000361021	9606.ENSP00000278616	0	0	0	0	0.064	0	0	0.878	0.881
GRIN2B	SRC	4451206	4444215	9606.ENSP00000477455	9606.ENSP00000362680	0	0	0	0	0.062	0.399	0	0.803	0.88
AKT1	HSPB2	4450372	4437856	9606.ENSP00000451828	9606.ENSP00000302476	0	0	0	0	0	0.265	0	0.843	0.88
CDC42	PTEN	4446990	4443848	9606.ENSP00000383118	9606.ENSP00000361021	0	0	0	0	0.062	0.169	0.6	0.661	0.88
PTGS2	PLA2G1B	4442894	4438770	9606.ENSP00000356438	9606.ENSP00000312286	0	0	0	0	0	0	0.65	0.669	0.879
NOS3	ACE	4437409	4436887	9606.ENSP00000297494	9606.ENSP00000290866	0	0	0	0	0.062	0	0	0.876	0.878
PRKACA	CACNA1C	4438521	4435696	9606.ENSP00000309591	9606.ENSP00000266376	0	0	0	0	0.063	0.379	0.8	0.08	0.878
AKT1	TNF	4450372	4448041	9606.ENSP00000451828	9606.ENSP00000398698	0	0	0	0	0	0.05	0	0.874	0.876
RELA	STAT3	4447098	4435468	9606.ENSP00000384273	9606.ENSP00000264657	0	0	0	0	0.108	0.379	0	0.794	0.876
PIK3CD	IGF1R	4444876	4435797	9606.ENSP00000366563	9606.ENSP00000268035	0	0	0	0	0.062	0.124	0.8	0.336	0.876
NOS1	CALM2	4451263	4436014	9606.ENSP00000477999	9606.ENSP00000272298	0	0	0	0	0.058	0.796	0	0.403	0.875
JUN	CASP3	4443699	4438651	9606.ENSP00000360266	9606.ENSP00000311032	0	0	0	0	0	0.069	0	0.87	0.874
PDE4D	PRKACA	4441530	4438521	9606.ENSP00000345502	9606.ENSP00000309591	0	0	0	0	0.148	0.546	0.6	0.286	0.874
ITGB3	ACTB	4450406	4441991	9606.ENSP00000452786	9606.ENSP00000349960	0	0	0	0	0	0.146	0.8	0.326	0.874
AKT1	ACTB	4450372	4441991	9606.ENSP00000451828	9606.ENSP00000349960	0	0	0	0	0.061	0.382	0	0.8	0.874
VCAM1	CRP	4437090	4434405	9606.ENSP00000294728	9606.ENSP00000255030	0	0	0	0	0	0	0	0.873	0.873
IL10	CRP	4448642	4434405	9606.ENSP00000412237	9606.ENSP00000255030	0	0	0	0	0	0	0	0.873	0.873
TNF	CASP3	4448041	4438651	9606.ENSP00000398698	9606.ENSP00000311032	0	0	0	0	0	0.302	0	0.825	0.873
PDE1C	CALM1	4446517	4441930	9606.ENSP00000379496	9606.ENSP00000349467	0	0	0	0	0.062	0.371	0.6	0.523	0.872
PRKACA	MAPK3	4438521	4435180	9606.ENSP00000309591	9606.ENSP00000263025	0	0	0.369	0.611	0.105	0.185	0.8	0.225	0.872
NQO1	TP53	4439310	4435880	9606.ENSP00000319788	9606.ENSP00000269305	0	0	0	0	0	0.379	0	0.8	0.871
ESR1	PRKACA	4448358	4438521	9606.ENSP00000405330	9606.ENSP00000309591	0	0	0	0	0	0.379	0.8	0.048	0.871
PROC	SERPINE1	4433614	4433266	9606.ENSP00000234071	9606.ENSP00000223095	0	0	0	0	0	0.129	0.8	0.323	0.871
ALOX5	PLA2G1B	4444382	4438770	9606.ENSP00000363512	9606.ENSP00000312286	0	0	0	0	0	0	0.65	0.646	0.87
PRKACA	MAPK1	4438521	4432880	9606.ENSP00000309591	9606.ENSP00000215832	0	0	0.357	0.611	0.064	0.185	0.8	0.299	0.87
VCAM1	IL1B	4437090	4435241	9606.ENSP00000294728	9606.ENSP00000263341	0	0	0	0	0.062	0	0	0.865	0.868
AVP	REN	4445364	4436004	9606.ENSP00000369647	9606.ENSP00000272190	0	0	0	0	0	0	0	0.868	0.868
SCN5A	KCNE2	4448544	4436854	9606.ENSP00000410257	9606.ENSP00000290310	0	0	0	0	0	0	0	0.867	0.867
GC	CYP2R1	4449184	4440580	9606.ENSP00000421725	9606.ENSP00000334592	0	0	0	0	0.066	0	0	0.863	0.867
PTEN	SMAD4	4443848	4441161	9606.ENSP00000361021	9606.ENSP00000341551	0	0	0	0	0.097	0	0	0.859	0.867
PARK7	ATP13A2	4448989	4439906	9606.ENSP00000418770	9606.ENSP00000327214	0	0	0	0	0	0	0	0.867	0.867
PIK3CD	SRC	4444876	4444215	9606.ENSP00000366563	9606.ENSP00000362680	0	0	0	0	0.058	0.124	0.8	0.289	0.866
CALM1	CAV1	4441930	4440933	9606.ENSP00000349467	9606.ENSP00000339191	0	0	0	0	0	0	0.8	0.358	0.866
CACNA1A	CALM3	4442347	4436903	9606.ENSP00000353362	9606.ENSP00000291295	0	0	0	0	0.061	0.806	0	0.32	0.865
GRIN1	CALM3	4443769	4436903	9606.ENSP00000360608	9606.ENSP00000291295	0	0	0	0	0.116	0.796	0	0.315	0.865
DRD2	COMT	4442557	4442480	9606.ENSP00000354859	9606.ENSP00000354511	0	0	0	0	0	0	0	0.865	0.865
CTNNB1	PRKACA	4441426	4438521	9606.ENSP00000344456	9606.ENSP00000309591	0	0	0	0	0.063	0.305	0.8	0.085	0.864
IL4	XBP1	4433533	4432900	9606.ENSP00000231449	9606.ENSP00000216037	0	0	0	0	0	0	0	0.864	0.864
TH	DRD2	4445511	4442557	9606.ENSP00000370571	9606.ENSP00000354859	0	0	0	0	0.095	0	0	0.855	0.863
TNF	SERPINE1	4448041	4433266	9606.ENSP00000398698	9606.ENSP00000223095	0	0	0	0	0.062	0	0	0.86	0.863
ADIPOQ	SIRT1	4447630	4432849	9606.ENSP00000389814	9606.ENSP00000212015	0	0	0	0	0	0	0	0.862	0.863
ADAM17	ADAM10	4438549	4434780	9606.ENSP00000309968	9606.ENSP00000260408	0	0	0	0.69	0.062	0	0.8	0.968	0.863
CASP3	MAPK3	4438651	4435180	9606.ENSP00000311032	9606.ENSP00000263025	0	0	0	0	0	0.261	0	0.821	0.862
NOS3	CRP	4437409	4434405	9606.ENSP00000297494	9606.ENSP00000255030	0	0	0	0	0	0	0	0.861	0.861
PLG	F12	4438461	4434311	9606.ENSP00000308938	9606.ENSP00000253496	0	0	0	0.696	0.189	0	0.8	0.607	0.861
VCAM1	IL4	4437090	4433533	9606.ENSP00000294728	9606.ENSP00000231449	0	0	0	0	0	0	0	0.861	0.861
STAT3	SIRT1	4435468	4432849	9606.ENSP00000264657	9606.ENSP00000212015	0	0	0	0	0.061	0.32	0	0.798	0.86
AKT1	BDNF	4450372	4448727	9606.ENSP00000451828	9606.ENSP00000414303	0	0	0	0	0	0.185	0	0.835	0.86
ADIPOQ	NAMPT	4447630	4433236	9606.ENSP00000389814	9606.ENSP00000222553	0	0	0	0	0	0	0	0.86	0.86
BDNF	FOS	4448727	4438204	9606.ENSP00000414303	9606.ENSP00000306245	0	0	0	0	0	0	0	0.859	0.86
NOS1	MAPK1	4451263	4432880	9606.ENSP00000477999	9606.ENSP00000215832	0	0	0	0	0.05	0	0.8	0.319	0.859
GHRL	FOS	4440636	4438204	9606.ENSP00000335074	9606.ENSP00000306245	0	0	0	0	0	0	0	0.859	0.859
CASP3	STAT3	4438651	4435468	9606.ENSP00000311032	9606.ENSP00000264657	0	0	0	0	0	0	0	0.858	0.858
ATP1A2	SCN1A	4442474	4437975	9606.ENSP00000354490	9606.ENSP00000303540	0	0	0	0	0.207	0.176	0	0.8	0.858
ROCK2	MAPK3	4439164	4435180	9606.ENSP00000317985	9606.ENSP00000263025	0	0	0	0.586	0.062	0.162	0.8	0.424	0.857
RELA	TP53	4447098	4435880	9606.ENSP00000384273	9606.ENSP00000269305	0	0	0	0	0.061	0.313	0	0.796	0.857
PTEN	MAPK3	4443848	4435180	9606.ENSP00000361021	9606.ENSP00000263025	0	0	0	0	0.064	0.261	0	0.808	0.855
ESR1	STAT3	4448358	4435468	9606.ENSP00000405330	9606.ENSP00000264657	0	0	0	0	0	0.386	0	0.773	0.855
ACE	SERPINE1	4436887	4433266	9606.ENSP00000290866	9606.ENSP00000223095	0	0	0	0	0	0	0	0.854	0.854
AKT1	PTGS2	4450372	4442894	9606.ENSP00000451828	9606.ENSP00000356438	0	0	0	0	0.062	0.058	0	0.848	0.854
LTA	IL1B	4448275	4435241	9606.ENSP00000403495	9606.ENSP00000263341	0	0	0	0	0.245	0	0	0.814	0.853
ABCB1	CYP3A4	4451279	4440831	9606.ENSP00000478255	9606.ENSP00000337915	0	0	0	0	0.083	0	0	0.845	0.852
SMAD3	STAT3	4440414	4435468	9606.ENSP00000332973	9606.ENSP00000264657	0	0	0	0	0.064	0.294	0	0.794	0.852
BDNF	CRH	4448727	4436231	9606.ENSP00000414303	9606.ENSP00000276571	0	0	0	0	0.093	0	0	0.843	0.852
JUN	SIRT1	4443699	4432849	9606.ENSP00000360266	9606.ENSP00000212015	0	0	0	0	0	0.472	0	0.729	0.851
PTEN	IGF1R	4443848	4435797	9606.ENSP00000361021	9606.ENSP00000268035	0	0	0	0	0.055	0.183	0	0.821	0.85
NOS2	IL1B	4439909	4435241	9606.ENSP00000327251	9606.ENSP00000263341	0	0	0	0	0.066	0	0	0.845	0.85
PRKCD	PIK3CD	4446312	4444876	9606.ENSP00000378217	9606.ENSP00000366563	0	0	0	0	0.085	0.165	0.8	0.134	0.85
F2	SERPINE1	4438421	4433266	9606.ENSP00000308541	9606.ENSP00000223095	0	0	0	0	0.072	0.435	0	0.736	0.849
TNF	MPO	4448041	4433305	9606.ENSP00000398698	9606.ENSP00000225275	0	0	0	0	0.074	0	0	0.843	0.848
ROCK2	MAPK1	4439164	4432880	9606.ENSP00000317985	9606.ENSP00000215832	0	0	0	0.591	0.062	0.162	0.8	0.307	0.848
DRD2	SLC6A4	4442557	4434929	9606.ENSP00000354859	9606.ENSP00000261707	0	0	0	0	0.061	0.127	0	0.828	0.847
NOS1	CACNA1C	4451263	4435696	9606.ENSP00000477999	9606.ENSP00000266376	0	0	0	0	0.061	0.092	0.8	0.212	0.847
HSPA4	NR3C1	4437917	4433539	9606.ENSP00000302961	9606.ENSP00000231509	0	0	0	0	0	0.4	0	0.753	0.845
NR3C2	REN	4442077	4436004	9606.ENSP00000350815	9606.ENSP00000272190	0	0	0	0	0	0	0	0.845	0.845
SERPINF2	F2	4439481	4438421	9606.ENSP00000321853	9606.ENSP00000308541	0	0	0	0	0.393	0.129	0	0.731	0.845
AKT1	POU5F1	4450372	4434735	9606.ENSP00000451828	9606.ENSP00000259915	0	0	0	0	0	0	0	0.844	0.844
ADIPOQ	SREBF1	4447630	4441794	9606.ENSP00000389814	9606.ENSP00000348069	0	0	0	0	0	0	0	0.844	0.844
NOS3	CALM2	4437409	4436014	9606.ENSP00000297494	9606.ENSP00000272298	0	0	0	0	0	0.794	0	0.267	0.842
CTNNB1	PPARG	4441426	4436745	9606.ENSP00000344456	9606.ENSP00000287820	0	0	0	0	0	0.385	0	0.754	0.842
ESR1	CTNNB1	4448358	4441426	9606.ENSP00000405330	9606.ENSP00000344456	0	0	0	0	0	0.409	0	0.743	0.842
CDC42	MAPK1	4446990	4432880	9606.ENSP00000383118	9606.ENSP00000215832	0	0	0	0	0.104	0.185	0	0.8	0.841
GRIN2B	PLAT	4451206	4433132	9606.ENSP00000477455	9606.ENSP00000220809	0	0	0	0	0	0	0	0.84	0.84
NOS3	REN	4437409	4436004	9606.ENSP00000297494	9606.ENSP00000272190	0	0	0	0	0.061	0	0	0.836	0.839
PTGS1	PLA2G1B	4442503	4438770	9606.ENSP00000354612	9606.ENSP00000312286	0	0	0	0	0	0	0.65	0.559	0.839
PTEN	CTNNB1	4443848	4441426	9606.ENSP00000361021	9606.ENSP00000344456	0	0	0	0	0.061	0.404	0	0.735	0.839
PTEN	MAPK1	4443848	4432880	9606.ENSP00000361021	9606.ENSP00000215832	0	0	0	0	0.064	0.261	0	0.786	0.839
NEFH	MAPK14	4438741	4433482	9606.ENSP00000311997	9606.ENSP00000229795	0	0	0	0	0.061	0.054	0.8	0.198	0.838
PTGS2	CTNNB1	4442894	4441426	9606.ENSP00000356438	9606.ENSP00000344456	0	0	0	0	0	0.379	0	0.748	0.837
CACNA1A	CALM2	4442347	4436014	9606.ENSP00000353362	9606.ENSP00000272298	0	0	0	0	0.061	0.806	0	0.173	0.836
TNF	MAPK1	4448041	4432880	9606.ENSP00000398698	9606.ENSP00000215832	0	0	0	0	0	0	0	0.836	0.836
IL10	PTGS2	4448642	4442894	9606.ENSP00000412237	9606.ENSP00000356438	0	0	0	0	0.061	0	0	0.831	0.836
AR	STAT3	4444436	4435468	9606.ENSP00000363822	9606.ENSP00000264657	0	0	0	0	0	0.386	0	0.743	0.836
PTGS2	NOS3	4442894	4437409	9606.ENSP00000356438	9606.ENSP00000297494	0	0	0	0	0	0.261	0	0.786	0.835
CACNA1B	CACNA1A	4443731	4442347	9606.ENSP00000360423	9606.ENSP00000353362	0	0	0	0.962	0.181	0	0.8	0.906	0.835
CDC42	NGFR	4446990	4432715	9606.ENSP00000383118	9606.ENSP00000172229	0	0	0	0	0	0	0.8	0.212	0.835
ADORA1	ADORA2B	4442839	4438057	9606.ENSP00000356205	9606.ENSP00000304501	0	0	0	0.913	0.064	0.151	0.8	0.574	0.835
PPARA	SIRT1	4447242	4432849	9606.ENSP00000385523	9606.ENSP00000212015	0	0	0	0	0	0.472	0	0.7	0.834
SELP	CRP	4435297	4434405	9606.ENSP00000263686	9606.ENSP00000255030	0	0	0	0	0.064	0	0	0.83	0.834
ESR1	CAV1	4448358	4440933	9606.ENSP00000405330	9606.ENSP00000339191	0	0	0	0	0	0.4	0	0.734	0.834
PTEN	SIRT1	4443848	4432849	9606.ENSP00000361021	9606.ENSP00000212015	0	0	0	0	0.063	0.13	0	0.81	0.833
CASP8	MAPK14	4442125	4433482	9606.ENSP00000351273	9606.ENSP00000229795	0	0	0	0	0	0.521	0	0.667	0.833
ABCA1	PPARG	4444444	4436745	9606.ENSP00000363868	9606.ENSP00000287820	0	0	0	0	0	0.076	0	0.827	0.833
ADIPOQ	GHRL	4447630	4440636	9606.ENSP00000389814	9606.ENSP00000335074	0	0	0	0	0	0	0	0.833	0.833
PARK7	TH	4448989	4445511	9606.ENSP00000418770	9606.ENSP00000370571	0	0	0	0	0	0	0	0.833	0.833
F2	SELP	4438421	4435297	9606.ENSP00000308541	9606.ENSP00000263686	0	0	0	0	0.061	0	0	0.829	0.832
ESR2	MAPK14	4441379	4433482	9606.ENSP00000343925	9606.ENSP00000229795	0	0	0	0	0	0.073	0.8	0.167	0.832
GRIN1	PRKACA	4443769	4438521	9606.ENSP00000360608	9606.ENSP00000309591	0	0	0	0	0	0.185	0.8	0.055	0.832
TNF	NOS3	4448041	4437409	9606.ENSP00000398698	9606.ENSP00000297494	0	0	0	0	0.061	0	0	0.828	0.832
CASP3	IL1B	4438651	4435241	9606.ENSP00000311032	9606.ENSP00000263341	0	0	0	0	0	0.074	0	0.824	0.831
CACNA1B	CALM1	4443731	4441930	9606.ENSP00000360423	9606.ENSP00000349467	0	0	0	0	0.116	0.734	0	0.341	0.831
GRIN2B	PRKACA	4451206	4438521	9606.ENSP00000477455	9606.ENSP00000309591	0	0	0	0	0.062	0.168	0.8	0	0.83
EDN1	REN	4445200	4436004	9606.ENSP00000368683	9606.ENSP00000272190	0	0	0	0	0	0	0	0.83	0.83
NOS3	VCAM1	4437409	4437090	9606.ENSP00000297494	9606.ENSP00000294728	0	0	0	0	0	0	0	0.83	0.83
GRIN1	CALM2	4443769	4436014	9606.ENSP00000360608	9606.ENSP00000272298	0	0	0	0	0.061	0.796	0	0.182	0.829
CACNA1A	CACNA1C	4442347	4435696	9606.ENSP00000353362	9606.ENSP00000266376	0	0	0	0.859	0.082	0	0.8	0.784	0.829
AKT1	ESR2	4450372	4441379	9606.ENSP00000451828	9606.ENSP00000343925	0	0	0	0	0	0.407	0	0.722	0.828
AKT1	IL10	4450372	4448642	9606.ENSP00000451828	9606.ENSP00000412237	0	0	0	0	0	0.079	0	0.821	0.828
TP53	POU5F1	4435880	4434735	9606.ENSP00000269305	9606.ENSP00000259915	0	0	0	0	0.076	0	0	0.821	0.828
PTEN	STAT3	4443848	4435468	9606.ENSP00000361021	9606.ENSP00000264657	0	0	0	0	0.061	0	0	0.824	0.828
IL10	ADIPOQ	4448642	4447630	9606.ENSP00000412237	9606.ENSP00000389814	0	0	0	0	0	0	0	0.827	0.827
SP1	PRKACA	4440095	4438521	9606.ENSP00000329357	9606.ENSP00000309591	0	0	0	0	0.078	0.132	0.8	0.049	0.827
PARK7	TP53	4448989	4435880	9606.ENSP00000418770	9606.ENSP00000269305	0	0	0	0	0	0.472	0	0.685	0.826
CACNA1B	CALM3	4443731	4436903	9606.ENSP00000360423	9606.ENSP00000291295	0	0	0	0	0.081	0.734	0	0.347	0.826
SMAD3	TP53	4440414	4435880	9606.ENSP00000332973	9606.ENSP00000269305	0	0	0	0	0.049	0.328	0	0.749	0.826
SMAD3	MAPK14	4440414	4433482	9606.ENSP00000332973	9606.ENSP00000229795	0	0	0	0	0.057	0.432	0	0.7	0.826
TNF	TP53	4448041	4435880	9606.ENSP00000398698	9606.ENSP00000269305	0	0	0	0	0	0	0	0.824	0.825
IL10	TLR7	4448642	4445433	9606.ENSP00000412237	9606.ENSP00000370034	0	0	0	0	0.076	0.157	0	0.793	0.825
GHRL	CRH	4440636	4436231	9606.ENSP00000335074	9606.ENSP00000276571	0	0	0	0	0	0	0	0.825	0.825
JUN	PRKACA	4443699	4438521	9606.ENSP00000360266	9606.ENSP00000309591	0	0	0	0	0	0	0.8	0.159	0.824
ALOX15	PLA2G1B	4450608	4438770	9606.ENSP00000458832	9606.ENSP00000312286	0	0	0	0	0	0	0.65	0.52	0.824
ADIPOQ	VCAM1	4447630	4437090	9606.ENSP00000389814	9606.ENSP00000294728	0	0	0	0	0.115	0	0	0.808	0.823
PTEN	JUN	4443848	4443699	9606.ENSP00000361021	9606.ENSP00000360266	0	0	0	0	0	0.085	0	0.813	0.822
GRIN3A	GRIA2	4442616	4437302	9606.ENSP00000355155	9606.ENSP00000296526	0	0	0	0.595	0.09	0.131	0.72	0.65	0.821
PTGS2	MAPK3	4442894	4435180	9606.ENSP00000356438	9606.ENSP00000263025	0	0	0	0	0	0.414	0	0.706	0.821
IL10	TGFB1	4448642	4433189	9606.ENSP00000412237	9606.ENSP00000221930	0	0	0	0	0	0	0	0.819	0.82
TH	FOS	4445511	4438204	9606.ENSP00000370571	9606.ENSP00000306245	0	0	0	0	0	0	0	0.82	0.82
ROCK2	NFKB1	4439164	4433374	9606.ENSP00000317985	9606.ENSP00000226574	0	0	0	0	0	0.125	0.8	0.056	0.82
PRKCD	PIK3R3	4446312	4435132	9606.ENSP00000378217	9606.ENSP00000262741	0	0	0	0	0	0.079	0.8	0.106	0.82
PARP1	CASP8	4442743	4442125	9606.ENSP00000355759	9606.ENSP00000351273	0	0	0	0	0	0.394	0	0.715	0.82
EDN1	VCAM1	4445200	4437090	9606.ENSP00000368683	9606.ENSP00000294728	0	0	0	0	0	0	0	0.82	0.82
IL1B	MPO	4435241	4433305	9606.ENSP00000263341	9606.ENSP00000225275	0	0	0	0	0.098	0	0	0.807	0.819
AKT1	SREBF1	4450372	4441794	9606.ENSP00000451828	9606.ENSP00000348069	0	0	0	0	0.085	0.06	0	0.806	0.819
PTGS2	PPARG	4442894	4436745	9606.ENSP00000356438	9606.ENSP00000287820	0	0	0	0	0	0.05	0	0.817	0.819
TNF	TLR8	4448041	4438750	9606.ENSP00000398698	9606.ENSP00000312082	0	0	0	0	0.156	0	0	0.794	0.819
PTGS2	FOS	4442894	4438204	9606.ENSP00000356438	9606.ENSP00000306245	0	0	0	0	0.109	0	0	0.802	0.817
AKT1	FOS	4450372	4438204	9606.ENSP00000451828	9606.ENSP00000306245	0	0	0	0	0	0.08	0	0.806	0.815
AKT1	ADIPOQ	4450372	4447630	9606.ENSP00000451828	9606.ENSP00000389814	0	0	0	0	0	0	0	0.815	0.815
VDR	CYP2R1	4450226	4440580	9606.ENSP00000447173	9606.ENSP00000334592	0	0	0	0	0	0.085	0	0.806	0.815
AKT1	ATM	4450372	4436300	9606.ENSP00000451828	9606.ENSP00000278616	0	0	0	0	0	0	0	0.814	0.814
CASP3	MAPK1	4438651	4432880	9606.ENSP00000311032	9606.ENSP00000215832	0	0	0	0	0.048	0.261	0	0.757	0.814
PRKACA	SCN1A	4438521	4437975	9606.ENSP00000309591	9606.ENSP00000303540	0	0	0	0	0.062	0	0.8	0.09	0.814
AKT1	SHH	4450372	4437380	9606.ENSP00000451828	9606.ENSP00000297261	0	0	0	0	0.062	0.081	0	0.802	0.814
SREBF1	PPARG	4441794	4436745	9606.ENSP00000348069	9606.ENSP00000287820	0	0	0	0	0	0	0	0.813	0.813
F2	CRP	4438421	4434405	9606.ENSP00000308541	9606.ENSP00000255030	0	0	0	0	0.15	0	0	0.789	0.813
TNF	TLR7	4448041	4445433	9606.ENSP00000398698	9606.ENSP00000370034	0	0	0	0	0.116	0	0	0.797	0.813
HSPB2	MAPK1	4437856	4432880	9606.ENSP00000302476	9606.ENSP00000215832	0	0	0	0	0	0.157	0	0.786	0.813
HIF1A	ESR1	4449842	4448358	9606.ENSP00000437955	9606.ENSP00000405330	0	0	0	0	0	0.413	0	0.695	0.813
NOS2	NOS3	4439909	4437409	9606.ENSP00000327251	9606.ENSP00000297494	0	0	0.447	0.944	0	0	0.8	0.814	0.813
JUND	MAPK1	4434256	4432880	9606.ENSP00000252818	9606.ENSP00000215832	0	0	0	0	0	0.424	0	0.687	0.812
NOS1	NOS2	4451263	4439909	9606.ENSP00000477999	9606.ENSP00000327251	0	0	0.438	0.95	0	0	0.8	0.812	0.812
SRC	TP53	4444215	4435880	9606.ENSP00000362680	9606.ENSP00000269305	0	0	0	0	0	0.384	0	0.708	0.812
CASP3	HSPB2	4438651	4437856	9606.ENSP00000311032	9606.ENSP00000302476	0	0	0	0	0	0.132	0	0.792	0.812
ESR1	PAK1	4448358	4436295	9606.ENSP00000405330	9606.ENSP00000278568	0	0	0	0	0	0.472	0	0.66	0.812
GRIN2B	DRD2	4451206	4442557	9606.ENSP00000477455	9606.ENSP00000354859	0	0	0	0	0.063	0.064	0	0.801	0.811
NR3C2	ACE	4442077	4436887	9606.ENSP00000350815	9606.ENSP00000290866	0	0	0	0	0.062	0	0	0.807	0.811
NOS1	NOS3	4451263	4437409	9606.ENSP00000477999	9606.ENSP00000297494	0	0	0.442	0.959	0	0	0.8	0.953	0.811
RELA	ROCK2	4447098	4439164	9606.ENSP00000384273	9606.ENSP00000317985	0	0	0	0	0	0	0.8	0.09	0.81
GRIN3A	PRKACA	4442616	4438521	9606.ENSP00000355155	9606.ENSP00000309591	0	0	0	0	0	0.085	0.8	0	0.809
TNF	TLR3	4448041	4437339	9606.ENSP00000398698	9606.ENSP00000296795	0	0	0	0	0	0	0	0.809	0.809
TNF	EDN1	4448041	4445200	9606.ENSP00000398698	9606.ENSP00000368683	0	0	0	0	0.063	0	0	0.802	0.807
AR	CYP17A1	4444436	4443418	9606.ENSP00000363822	9606.ENSP00000358903	0	0	0	0	0	0.085	0	0.797	0.807
CSF2	TLR3	4437349	4437339	9606.ENSP00000296871	9606.ENSP00000296795	0	0	0	0	0	0	0	0.806	0.806
GRIN2B	CALM1	4451206	4441930	9606.ENSP00000477455	9606.ENSP00000349467	0	0	0	0	0.117	0.143	0.6	0.434	0.806
IL10	LTA	4448642	4448275	9606.ENSP00000412237	9606.ENSP00000403495	0	0	0	0	0.081	0	0	0.798	0.806
PRKACA	GRIA2	4438521	4437302	9606.ENSP00000309591	9606.ENSP00000296526	0	0	0	0	0	0.05	0.8	0.065	0.806
FOS	IL1B	4438204	4435241	9606.ENSP00000306245	9606.ENSP00000263341	0	0	0	0	0.063	0	0	0.802	0.806
SRC	TLR3	4444215	4437339	9606.ENSP00000362680	9606.ENSP00000296795	0	0	0	0	0	0.432	0	0.671	0.805
BDNF	TNF	4448727	4448041	9606.ENSP00000414303	9606.ENSP00000398698	0	0	0	0	0	0	0	0.805	0.805
SREBF1	TP53	4441794	4435880	9606.ENSP00000348069	9606.ENSP00000269305	0	0	0	0	0	0.379	0	0.697	0.804
PRKACA	PDE11A	4438521	4436657	9606.ENSP00000309591	9606.ENSP00000286063	0	0	0	0	0.148	0.652	0	0.393	0.804
ESR1	XBP1	4448358	4432900	9606.ENSP00000405330	9606.ENSP00000216037	0	0	0	0	0.082	0.379	0	0.685	0.804
IL10	CX3CR1	4448642	4442101	9606.ENSP00000412237	9606.ENSP00000351059	0	0	0	0	0	0	0	0.803	0.803
DRD2	GHRL	4442557	4440636	9606.ENSP00000354859	9606.ENSP00000335074	0	0	0	0	0	0	0.6	0.53	0.803
MTAP	APRT	4445335	4445041	9606.ENSP00000369519	9606.ENSP00000367615	0.219	0	0	0	0.064	0	0	0.753	0.803
BDNF	NR3C1	4448727	4433539	9606.ENSP00000414303	9606.ENSP00000231509	0	0	0	0	0	0	0	0.802	0.802
HDAC9	SIRT1	4448493	4432849	9606.ENSP00000408617	9606.ENSP00000212015	0	0	0	0	0.052	0.166	0	0.77	0.802
PARP1	MAPK1	4442743	4432880	9606.ENSP00000355759	9606.ENSP00000215832	0	0	0	0	0.063	0.379	0	0.688	0.802
BDNF	SHH	4448727	4437380	9606.ENSP00000414303	9606.ENSP00000297261	0	0	0	0	0	0	0	0.802	0.802
CALM3	CALM2	4436903	4436014	9606.ENSP00000291295	9606.ENSP00000272298	0	0	0.449	0.985	0	0.8	0	0.55	0.802
PPARA	PRKACA	4447242	4438521	9606.ENSP00000385523	9606.ENSP00000309591	0	0	0	0	0	0	0.8	0.046	0.801
ESR1	PTEN	4448358	4443848	9606.ENSP00000405330	9606.ENSP00000361021	0	0	0	0	0	0.393	0	0.686	0.801
PIK3CD	NGFR	4444876	4432715	9606.ENSP00000366563	9606.ENSP00000172229	0	0	0	0	0	0	0.8	0	0.8
ESR2	PRKACA	4441379	4438521	9606.ENSP00000343925	9606.ENSP00000309591	0	0	0	0	0	0	0.8	0	0.8
PTGS2	IL4	4442894	4433533	9606.ENSP00000356438	9606.ENSP00000231449	0	0	0	0	0.062	0	0	0.795	0.8
HTR2A	BDNF	4449830	4448727	9606.ENSP00000437737	9606.ENSP00000414303	0	0	0	0	0.061	0	0	0.796	0.8
PIK3CB	NGFR	4436798	4432715	9606.ENSP00000289153	9606.ENSP00000172229	0	0	0	0	0	0	0.8	0	0.8
PIK3R3	NGFR	4435132	4432715	9606.ENSP00000262741	9606.ENSP00000172229	0	0	0	0	0	0	0.8	0.043	0.8
ESR1	SIRT1	4448358	4432849	9606.ENSP00000405330	9606.ENSP00000212015	0	0	0	0	0	0.393	0	0.682	0.799
JUNB	MAPK14	4437951	4433482	9606.ENSP00000303315	9606.ENSP00000229795	0	0	0	0	0	0.424	0.6	0.195	0.798
PARK7	HSPA4	4448989	4437917	9606.ENSP00000418770	9606.ENSP00000302961	0.06	0	0	0	0.103	0.524	0	0.556	0.798
BDNF	IL1B	4448727	4435241	9606.ENSP00000414303	9606.ENSP00000263341	0	0	0	0	0	0	0	0.798	0.798
ACE	CRP	4436887	4434405	9606.ENSP00000290866	9606.ENSP00000255030	0	0	0	0	0	0	0	0.798	0.798
KCNE2	CACNA1C	4436854	4435696	9606.ENSP00000290310	9606.ENSP00000266376	0	0	0	0	0	0.379	0	0.687	0.797
SMAD4	TP53	4441161	4435880	9606.ENSP00000341551	9606.ENSP00000269305	0	0	0	0	0.064	0	0	0.792	0.797
TP53	SERPINE1	4435880	4433266	9606.ENSP00000269305	9606.ENSP00000223095	0	0	0	0	0	0	0	0.797	0.797
EDN1	PTGS2	4445200	4442894	9606.ENSP00000368683	9606.ENSP00000356438	0	0	0	0	0.089	0	0	0.786	0.796
BDNF	IGF1R	4448727	4435797	9606.ENSP00000414303	9606.ENSP00000268035	0	0	0	0	0	0.185	0.6	0.427	0.796
HIF1A	CTNNB1	4449842	4441426	9606.ENSP00000437955	9606.ENSP00000344456	0	0	0	0	0.078	0.379	0	0.67	0.795
PTGS2	CAV1	4442894	4440933	9606.ENSP00000356438	9606.ENSP00000339191	0	0	0	0	0.084	0.379	0	0.669	0.795
BDNF	NOS3	4448727	4437409	9606.ENSP00000414303	9606.ENSP00000297494	0	0	0	0	0	0.379	0	0.683	0.795
GC	CYP24A1	4449184	4432987	9606.ENSP00000421725	9606.ENSP00000216862	0	0	0	0	0.061	0	0	0.79	0.795
TH	TAC1	4445511	4439413	9606.ENSP00000370571	9606.ENSP00000321106	0	0	0	0	0.062	0	0	0.79	0.794
AGTR1	NOS3	4449040	4437409	9606.ENSP00000419422	9606.ENSP00000297494	0	0	0	0	0.061	0.379	0	0.676	0.794
PTGS2	PTGER2	4442894	4433932	9606.ENSP00000356438	9606.ENSP00000245457	0	0	0	0	0.098	0.056	0	0.777	0.794
NR1H3	ABCG1	4451232	4442587	9606.ENSP00000477707	9606.ENSP00000354995	0	0	0	0	0.059	0.076	0	0.782	0.794
PPARG	IL1B	4436745	4435241	9606.ENSP00000287820	9606.ENSP00000263341	0	0	0	0	0.061	0	0	0.789	0.794
IL1B	MAPK1	4435241	4432880	9606.ENSP00000263341	9606.ENSP00000215832	0	0	0	0	0	0	0	0.794	0.794
HSPA1A	STUB1	4444600	4433095	9606.ENSP00000364802	9606.ENSP00000219548	0	0	0	0	0	0.608	0	0.496	0.794
CASP3	NOS3	4438651	4437409	9606.ENSP00000311032	9606.ENSP00000297494	0	0	0	0	0	0	0	0.793	0.793
TAC1	FOS	4439413	4438204	9606.ENSP00000321106	9606.ENSP00000306245	0	0	0	0	0	0	0	0.793	0.793
ADIPOQ	SERPINE1	4447630	4433266	9606.ENSP00000389814	9606.ENSP00000223095	0	0	0	0	0	0	0	0.792	0.792
CTNNB1	TP53	4441426	4435880	9606.ENSP00000344456	9606.ENSP00000269305	0	0	0	0	0	0	0	0.792	0.792
IL1B	CRP	4435241	4434405	9606.ENSP00000263341	9606.ENSP00000255030	0	0	0	0	0.062	0	0	0.788	0.792
BDNF	SLC6A4	4448727	4434929	9606.ENSP00000414303	9606.ENSP00000261707	0	0	0	0	0.061	0	0	0.788	0.792
OPRM1	FOS	4447859	4438204	9606.ENSP00000394624	9606.ENSP00000306245	0	0	0	0	0	0	0	0.792	0.792
EDN1	ACE	4445200	4436887	9606.ENSP00000368683	9606.ENSP00000290866	0	0	0	0	0	0	0	0.792	0.792
AR	CAV1	4444436	4440933	9606.ENSP00000363822	9606.ENSP00000339191	0	0	0	0	0	0.4	0	0.665	0.791
AKT1	PARP1	4450372	4442743	9606.ENSP00000451828	9606.ENSP00000355759	0	0	0	0	0.061	0.057	0	0.783	0.791
AKT1	VCAM1	4450372	4437090	9606.ENSP00000451828	9606.ENSP00000294728	0	0	0	0	0	0	0	0.791	0.791
AR	SP1	4444436	4440095	9606.ENSP00000363822	9606.ENSP00000329357	0	0	0	0	0	0.424	0	0.65	0.79
CALM3	NGFR	4436903	4432715	9606.ENSP00000291295	9606.ENSP00000172229	0	0	0	0	0	0.777	0	0.097	0.79
CRP	MPO	4434405	4433305	9606.ENSP00000255030	9606.ENSP00000225275	0	0	0	0	0	0	0	0.789	0.789
CALM1	NGFR	4441930	4432715	9606.ENSP00000349467	9606.ENSP00000172229	0	0	0	0	0	0.777	0	0.092	0.789
CD34	CSF2	4438554	4437349	9606.ENSP00000310036	9606.ENSP00000296871	0	0	0	0	0	0	0	0.789	0.789
HSPA1A	HSPB2	4444600	4437856	9606.ENSP00000364802	9606.ENSP00000302476	0	0	0	0	0.065	0.127	0	0.762	0.789
SGK1	NR3C1	4442972	4433539	9606.ENSP00000356832	9606.ENSP00000231509	0	0	0	0	0.063	0.081	0	0.773	0.787
AGT	NOS3	4442719	4437409	9606.ENSP00000355627	9606.ENSP00000297494	0	0	0	0	0.061	0	0	0.782	0.787
AKT1	RELA	4450372	4447098	9606.ENSP00000451828	9606.ENSP00000384273	0	0	0	0	0.086	0	0	0.776	0.786
SHH	TP53	4437380	4435880	9606.ENSP00000297261	9606.ENSP00000269305	0	0	0	0	0	0	0	0.785	0.785
PTEN	PPARG	4443848	4436745	9606.ENSP00000361021	9606.ENSP00000287820	0	0	0	0	0.061	0.064	0	0.775	0.785
SMARCA4	PPARG	4447900	4436745	9606.ENSP00000395654	9606.ENSP00000287820	0	0	0	0	0	0.39	0.6	0.189	0.785
PTGS2	MAPK14	4442894	4433482	9606.ENSP00000356438	9606.ENSP00000229795	0	0	0	0	0	0.086	0	0.774	0.785
TNF	TGFB1	4448041	4433189	9606.ENSP00000398698	9606.ENSP00000221930	0	0	0	0	0.089	0	0	0.774	0.785
HMGB1	IL1B	4441512	4435241	9606.ENSP00000345347	9606.ENSP00000263341	0	0	0	0	0	0.379	0	0.668	0.785
CALR	XBP1	4439395	4432900	9606.ENSP00000320866	9606.ENSP00000216037	0	0	0	0	0.113	0	0	0.768	0.785
PTEN	PIK3CG	4443848	4442215	9606.ENSP00000361021	9606.ENSP00000352121	0	0	0	0	0.064	0.185	0	0.74	0.784
AGTR1	PPARG	4449040	4436745	9606.ENSP00000419422	9606.ENSP00000287820	0	0	0	0	0.061	0	0	0.779	0.784
FOS	CEBPB	4438204	4438125	9606.ENSP00000306245	9606.ENSP00000305422	0	0	0	0	0.196	0.085	0	0.73	0.784
CTNNB1	SIRT1	4441426	4432849	9606.ENSP00000344456	9606.ENSP00000212015	0	0	0	0	0.062	0.351	0	0.671	0.783
AR	IGF1R	4444436	4435797	9606.ENSP00000363822	9606.ENSP00000268035	0	0	0	0	0.051	0.085	0	0.77	0.783
PTGS2	VCAM1	4442894	4437090	9606.ENSP00000356438	9606.ENSP00000294728	0	0	0	0	0.061	0	0	0.778	0.783
ADAM10	SIRT1	4434780	4432849	9606.ENSP00000260408	9606.ENSP00000212015	0	0	0	0	0.063	0.299	0	0.695	0.782
PDE1A	CALM3	4448547	4436903	9606.ENSP00000410309	9606.ENSP00000291295	0	0	0	0	0.062	0.614	0	0.448	0.782
AR	MAPK1	4444436	4432880	9606.ENSP00000363822	9606.ENSP00000215832	0	0	0	0	0	0.399	0	0.651	0.782
SMAD3	PPARG	4440414	4436745	9606.ENSP00000332973	9606.ENSP00000287820	0	0	0	0	0	0.393	0	0.653	0.781
CTNNB1	NFKB1	4441426	4433374	9606.ENSP00000344456	9606.ENSP00000226574	0	0	0	0	0.044	0.682	0	0.337	0.781
GRIN2B	PTK2B	4451206	4446690	9606.ENSP00000477455	9606.ENSP00000380638	0	0	0	0	0.078	0.181	0.54	0.444	0.781
IL10	TLR8	4448642	4438750	9606.ENSP00000412237	9606.ENSP00000312082	0	0	0	0	0.089	0.157	0	0.737	0.78
STAT3	NFKB1	4435468	4433374	9606.ENSP00000264657	9606.ENSP00000226574	0	0	0	0	0.092	0.524	0	0.531	0.78
CALM2	NGFR	4436014	4432715	9606.ENSP00000272298	9606.ENSP00000172229	0	0	0	0	0	0.777	0	0.053	0.779
ACTB	PPARG	4441991	4436745	9606.ENSP00000349960	9606.ENSP00000287820	0	0	0	0	0	0.05	0.6	0.466	0.779
SMAD4	MAPK1	4441161	4432880	9606.ENSP00000341551	9606.ENSP00000215832	0	0	0	0	0	0.406	0	0.644	0.779
SRC	CASP8	4444215	4442125	9606.ENSP00000362680	9606.ENSP00000351273	0	0	0	0	0	0.064	0	0.773	0.779
SP1	PPARG	4440095	4436745	9606.ENSP00000329357	9606.ENSP00000287820	0	0	0	0	0	0.472	0	0.597	0.778
IL10	MAPK1	4448642	4432880	9606.ENSP00000412237	9606.ENSP00000215832	0	0	0	0	0	0	0	0.777	0.777
CTNNB1	CAV1	4441426	4440933	9606.ENSP00000344456	9606.ENSP00000339191	0	0	0	0	0	0.379	0	0.655	0.776
PTEN	CASP3	4443848	4438651	9606.ENSP00000361021	9606.ENSP00000311032	0	0	0	0	0.062	0	0	0.771	0.776
BDNF	FNDC5	4448727	4444192	9606.ENSP00000414303	9606.ENSP00000362570	0	0	0	0	0.061	0	0	0.771	0.776
TNF	NAMPT	4448041	4433236	9606.ENSP00000398698	9606.ENSP00000222553	0	0	0	0	0.065	0	0	0.769	0.775
SLC8A1	ATP1A2	4447160	4442474	9606.ENSP00000384763	9606.ENSP00000354490	0	0	0	0	0.09	0.631	0	0.383	0.774
SMAD4	BMP6	4441161	4436524	9606.ENSP00000341551	9606.ENSP00000283147	0	0	0	0	0	0.152	0	0.743	0.773
ESR1	PTGS2	4448358	4442894	9606.ENSP00000405330	9606.ENSP00000356438	0	0	0	0	0	0.05	0	0.771	0.773
IL10	MPO	4448642	4433305	9606.ENSP00000412237	9606.ENSP00000225275	0	0	0	0	0	0	0	0.772	0.772
CACNA1B	CALM2	4443731	4436014	9606.ENSP00000360423	9606.ENSP00000272298	0	0	0	0	0.062	0.734	0	0.16	0.772
HIF1A	HSPA4	4449842	4437917	9606.ENSP00000437955	9606.ENSP00000302961	0	0	0	0	0	0.393	0	0.638	0.771
PLG	CRP	4438461	4434405	9606.ENSP00000308938	9606.ENSP00000255030	0	0	0	0	0.166	0	0	0.737	0.771
BDNF	SIRT1	4448727	4432849	9606.ENSP00000414303	9606.ENSP00000212015	0	0	0	0	0	0	0	0.77	0.77
IL10	NR3C1	4448642	4433539	9606.ENSP00000412237	9606.ENSP00000231509	0	0	0	0	0	0.328	0	0.671	0.77
JUN	NFKB1	4443699	4433374	9606.ENSP00000360266	9606.ENSP00000226574	0	0	0	0	0.063	0	0	0.763	0.769
CAV1	MAPK3	4440933	4435180	9606.ENSP00000339191	9606.ENSP00000263025	0	0	0	0	0	0.379	0	0.644	0.769
CTNNB1	SMAD3	4441426	4440414	9606.ENSP00000344456	9606.ENSP00000332973	0	0	0	0	0.063	0.466	0	0.575	0.769
ADRB2	IL1B	4438121	4435241	9606.ENSP00000305372	9606.ENSP00000263341	0	0	0	0	0.088	0.379	0	0.624	0.768
ADIPOQ	PTGS2	4447630	4442894	9606.ENSP00000389814	9606.ENSP00000356438	0	0	0	0	0	0	0	0.768	0.768
CDC42	MAPK3	4446990	4435180	9606.ENSP00000383118	9606.ENSP00000263025	0	0	0	0	0.061	0.185	0	0.72	0.767
RELA	ATM	4447098	4436300	9606.ENSP00000384273	9606.ENSP00000278616	0	0	0	0	0	0.379	0	0.641	0.767
EDN1	FOS	4445200	4438204	9606.ENSP00000368683	9606.ENSP00000306245	0	0	0	0	0	0	0	0.767	0.767
PTGS2	CEBPB	4442894	4438125	9606.ENSP00000356438	9606.ENSP00000305422	0	0	0	0	0.151	0	0	0.737	0.767
PTEN	CAV1	4443848	4440933	9606.ENSP00000361021	9606.ENSP00000339191	0	0	0	0	0	0.32	0	0.671	0.766
CALM3	PDE1B	4436903	4433839	9606.ENSP00000291295	9606.ENSP00000243052	0	0	0	0	0.062	0.72	0	0.179	0.765
SCN5A	SCNN1G	4448544	4437627	9606.ENSP00000410257	9606.ENSP00000300061	0	0	0	0	0	0	0.72	0.197	0.765
ADORA1	P2RY1	4442839	4438073	9606.ENSP00000356205	9606.ENSP00000304767	0	0	0	0	0	0.454	0	0.587	0.765
DRD2	PAWR	4442557	4439982	9606.ENSP00000354859	9606.ENSP00000328088	0	0	0	0	0	0.472	0	0.573	0.765
UCHL1	TP53	4436586	4435880	9606.ENSP00000284440	9606.ENSP00000269305	0	0	0	0	0	0.379	0	0.638	0.765
CACNA1B	CACNA1C	4443731	4435696	9606.ENSP00000360423	9606.ENSP00000266376	0	0	0	0.862	0.09	0	0.72	0.821	0.764
BCL2	CASP3	4446777	4438651	9606.ENSP00000381185	9606.ENSP00000311032	0	0	0	0	0	0.461	0	0.578	0.763
AKT1	ABCG2	4450372	4433689	9606.ENSP00000451828	9606.ENSP00000237612	0	0	0	0	0.062	0.056	0	0.753	0.763
ABCA1	SREBF1	4444444	4441794	9606.ENSP00000363868	9606.ENSP00000348069	0	0	0	0	0.061	0	0	0.758	0.763
RELA	AR	4447098	4444436	9606.ENSP00000384273	9606.ENSP00000363822	0	0	0	0	0	0.393	0	0.625	0.763
AKT1	CSF2	4450372	4437349	9606.ENSP00000451828	9606.ENSP00000296871	0	0	0	0	0	0	0	0.762	0.762
SCN5A	SCNN1A	4448544	4442340	9606.ENSP00000410257	9606.ENSP00000353292	0	0	0	0	0	0	0.72	0.186	0.762
SRC	CALM1	4444215	4441930	9606.ENSP00000362680	9606.ENSP00000349467	0	0	0	0	0	0.125	0	0.739	0.762
ESR1	PARP1	4448358	4442743	9606.ENSP00000405330	9606.ENSP00000355759	0	0	0	0	0	0.342	0	0.652	0.761
AKT1	SERPINE1	4450372	4433266	9606.ENSP00000451828	9606.ENSP00000223095	0	0	0	0	0	0	0	0.761	0.761
TNF	SELP	4448041	4435297	9606.ENSP00000398698	9606.ENSP00000263686	0	0	0	0	0.069	0.185	0	0.711	0.761
CALM2	PDE1B	4436014	4433839	9606.ENSP00000272298	9606.ENSP00000243052	0	0	0	0	0.062	0.72	0	0.164	0.761
AR	SREBF1	4444436	4441794	9606.ENSP00000363822	9606.ENSP00000348069	0	0	0	0	0	0.379	0	0.63	0.76
IL10	JUN	4448642	4443699	9606.ENSP00000412237	9606.ENSP00000360266	0	0	0	0	0	0	0	0.759	0.76
CTNNB1	STAT3	4441426	4435468	9606.ENSP00000344456	9606.ENSP00000264657	0	0	0	0	0	0	0	0.759	0.76
AGT	STAT3	4442719	4435468	9606.ENSP00000355627	9606.ENSP00000264657	0	0	0	0	0	0.379	0	0.628	0.759
PC	G6PD	4446208	4446162	9606.ENSP00000377532	9606.ENSP00000377192	0	0	0	0	0.088	0	0	0.746	0.758
NOS3	PPARG	4437409	4436745	9606.ENSP00000297494	9606.ENSP00000287820	0	0	0	0	0.053	0.091	0	0.741	0.757
PTGS2	CSF2	4442894	4437349	9606.ENSP00000356438	9606.ENSP00000296871	0	0	0	0	0.095	0	0	0.743	0.757
PARK7	AR	4448989	4444436	9606.ENSP00000418770	9606.ENSP00000363822	0	0	0	0	0	0.379	0	0.625	0.757
HIF1A	PTEN	4449842	4443848	9606.ENSP00000437955	9606.ENSP00000361021	0	0	0	0	0.061	0	0	0.751	0.757
SMARCA4	POU5F1	4447900	4434735	9606.ENSP00000395654	9606.ENSP00000259915	0	0	0	0	0	0.079	0	0.745	0.756
PTGS1	IL1B	4442503	4435241	9606.ENSP00000354612	9606.ENSP00000263341	0	0	0	0	0.156	0	0	0.723	0.756
TP53	CCNH	4435880	4434515	9606.ENSP00000269305	9606.ENSP00000256897	0	0	0	0	0	0.379	0	0.623	0.756
COX8A	CHRM1	4439425	4438226	9606.ENSP00000321260	9606.ENSP00000306490	0	0	0	0	0	0	0	0.756	0.756
BDNF	TH	4448727	4445511	9606.ENSP00000414303	9606.ENSP00000370571	0	0	0	0	0.061	0	0	0.75	0.756
TLR8	IL1B	4438750	4435241	9606.ENSP00000312082	9606.ENSP00000263341	0	0	0	0	0.288	0	0	0.67	0.755
ANXA1	PLA2G1B	4444796	4438770	9606.ENSP00000366109	9606.ENSP00000312286	0	0	0	0	0.081	0	0	0.743	0.754
ADIPOQ	IL1B	4447630	4435241	9606.ENSP00000389814	9606.ENSP00000263341	0	0	0	0	0	0	0	0.754	0.754
IL10	MAPK14	4448642	4433482	9606.ENSP00000412237	9606.ENSP00000229795	0	0	0	0	0	0	0	0.754	0.754
CYP2B6	PLA2G1B	4439703	4438770	9606.ENSP00000324648	9606.ENSP00000312286	0	0	0	0	0.054	0	0.65	0.317	0.754
PTGS2	MAPK1	4442894	4432880	9606.ENSP00000356438	9606.ENSP00000215832	0	0	0	0	0	0.266	0	0.678	0.753
PLA2G1B	FADS2	4438770	4436312	9606.ENSP00000312286	9606.ENSP00000278840	0	0	0	0	0.05	0	0.65	0.319	0.753
CEBPB	IL1B	4438125	4435241	9606.ENSP00000305422	9606.ENSP00000263341	0	0	0	0	0.117	0	0	0.731	0.753
P4HB	XBP1	4439955	4432900	9606.ENSP00000327801	9606.ENSP00000216037	0	0	0	0	0.126	0	0	0.728	0.752
HTR2A	FOS	4449830	4438204	9606.ENSP00000437737	9606.ENSP00000306245	0	0	0	0	0	0	0	0.751	0.752
ACTB	CAV1	4441991	4440933	9606.ENSP00000349960	9606.ENSP00000339191	0	0	0	0	0.051	0.389	0	0.604	0.751
SELP	IL4	4435297	4433533	9606.ENSP00000263686	9606.ENSP00000231449	0	0	0	0	0.062	0	0	0.745	0.751
PPARA	SREBF1	4447242	4441794	9606.ENSP00000385523	9606.ENSP00000348069	0	0	0	0	0	0	0	0.751	0.751
RELA	PARP1	4447098	4442743	9606.ENSP00000384273	9606.ENSP00000355759	0	0	0	0	0	0.379	0	0.616	0.751
TAC1	CRH	4439413	4436231	9606.ENSP00000321106	9606.ENSP00000276571	0	0	0	0	0.077	0	0	0.742	0.751
BDNF	MAPK1	4448727	4432880	9606.ENSP00000414303	9606.ENSP00000215832	0	0	0	0	0	0	0	0.75	0.75
SELP	IL1B	4435297	4435241	9606.ENSP00000263686	9606.ENSP00000263341	0	0	0	0	0.097	0	0	0.734	0.75
ABCB1	CAV1	4451279	4440933	9606.ENSP00000478255	9606.ENSP00000339191	0	0	0	0	0	0.379	0	0.613	0.75
IL10	FOS	4448642	4438204	9606.ENSP00000412237	9606.ENSP00000306245	0	0	0	0	0	0.063	0	0.743	0.748
G6PD	SREBF1	4446162	4441794	9606.ENSP00000377192	9606.ENSP00000348069	0	0	0	0	0.076	0.09	0	0.724	0.748
ITGB3	SELP	4450406	4435297	9606.ENSP00000452786	9606.ENSP00000263686	0	0	0	0	0.117	0	0	0.726	0.747
AR	CASP3	4444436	4438651	9606.ENSP00000363822	9606.ENSP00000311032	0	0	0	0	0	0.39	0	0.6	0.746
SMARCA4	SP1	4447900	4440095	9606.ENSP00000395654	9606.ENSP00000329357	0	0	0	0	0.076	0.434	0	0.552	0.746
AKT1	CASP8	4450372	4442125	9606.ENSP00000451828	9606.ENSP00000351273	0	0	0	0	0	0.064	0	0.74	0.746
CAV1	TP53	4440933	4435880	9606.ENSP00000339191	9606.ENSP00000269305	0	0	0	0	0	0	0	0.746	0.746
AKT1	PARK7	4450372	4448989	9606.ENSP00000451828	9606.ENSP00000418770	0	0	0	0	0	0.185	0	0.699	0.745
ACTB	NOS3	4441991	4437409	9606.ENSP00000349960	9606.ENSP00000297494	0	0	0	0	0.063	0.302	0	0.641	0.745
IL10	IL6ST	4448642	4445526	9606.ENSP00000412237	9606.ENSP00000370698	0	0	0	0	0	0	0.6	0.389	0.745
POU5F1	ABCG2	4434735	4433689	9606.ENSP00000259915	9606.ENSP00000237612	0	0	0	0	0	0	0	0.744	0.744
BDNF	OPRM1	4448727	4447859	9606.ENSP00000414303	9606.ENSP00000394624	0	0	0	0	0	0	0	0.743	0.743
AKT1	STUB1	4450372	4433095	9606.ENSP00000451828	9606.ENSP00000219548	0	0	0	0	0.07	0.472	0	0.518	0.743
SLC6A4	HTR2B	4434929	4434624	9606.ENSP00000261707	9606.ENSP00000258400	0	0	0	0	0	0.073	0	0.735	0.743
TH	COMT	4445511	4442480	9606.ENSP00000370571	9606.ENSP00000354511	0	0	0	0	0	0	0	0.743	0.743
BCL2	CD34	4446777	4438554	9606.ENSP00000381185	9606.ENSP00000310036	0	0	0	0	0	0	0.72	0.119	0.742
TNF	MAPK3	4448041	4435180	9606.ENSP00000398698	9606.ENSP00000263025	0	0	0	0	0	0	0	0.742	0.742
PARK7	UCHL1	4448989	4436586	9606.ENSP00000418770	9606.ENSP00000284440	0	0	0	0	0.061	0	0	0.735	0.741
TNF	REN	4448041	4436004	9606.ENSP00000398698	9606.ENSP00000272190	0	0	0	0	0	0	0	0.741	0.741
CDC42	CASP3	4446990	4438651	9606.ENSP00000383118	9606.ENSP00000311032	0	0	0	0	0.061	0.519	0	0.473	0.741
TH	SLC6A4	4445511	4434929	9606.ENSP00000370571	9606.ENSP00000261707	0	0	0	0	0.06	0	0	0.735	0.74
TH	CALCA	4445511	4440295	9606.ENSP00000370571	9606.ENSP00000331746	0	0	0	0	0.064	0	0	0.733	0.739
DBH	CALCA	4446100	4440295	9606.ENSP00000376776	9606.ENSP00000331746	0	0	0	0	0	0	0	0.739	0.739
OPRM1	TAC1	4447859	4439413	9606.ENSP00000394624	9606.ENSP00000321106	0	0	0	0	0	0	0	0.738	0.738
TP53	NFKB1	4435880	4433374	9606.ENSP00000269305	9606.ENSP00000226574	0	0	0	0	0.051	0.05	0	0.732	0.737
HTR2A	COMT	4449830	4442480	9606.ENSP00000437737	9606.ENSP00000354511	0	0	0	0	0	0	0	0.736	0.736
AR	JUN	4444436	4443699	9606.ENSP00000363822	9606.ENSP00000360266	0	0	0	0	0	0.454	0	0.535	0.736
FOS	HSPA4	4438204	4437917	9606.ENSP00000306245	9606.ENSP00000302961	0	0	0	0	0	0.057	0	0.731	0.736
IL1B	TGFB1	4435241	4433189	9606.ENSP00000263341	9606.ENSP00000221930	0	0	0	0	0.087	0	0	0.723	0.736
PRKCD	ACTB	4446312	4441991	9606.ENSP00000378217	9606.ENSP00000349960	0	0	0	0	0.061	0.403	0	0.565	0.735
IL10	PTEN	4448642	4443848	9606.ENSP00000412237	9606.ENSP00000361021	0	0	0	0	0	0	0	0.734	0.735
ABCG1	PPARG	4442587	4436745	9606.ENSP00000354995	9606.ENSP00000287820	0	0	0	0	0	0.076	0	0.725	0.735
TP53	STUB1	4435880	4433095	9606.ENSP00000269305	9606.ENSP00000219548	0	0	0	0	0.063	0.379	0	0.581	0.735
AKT1	ADAM17	4450372	4438549	9606.ENSP00000451828	9606.ENSP00000309968	0	0	0	0	0.053	0	0	0.73	0.735
ADIPOQ	EDN1	4447630	4445200	9606.ENSP00000389814	9606.ENSP00000368683	0	0	0	0	0	0	0	0.735	0.735
BDNF	JUN	4448727	4443699	9606.ENSP00000414303	9606.ENSP00000360266	0	0	0	0	0	0	0	0.735	0.735
SP1	NOS3	4440095	4437409	9606.ENSP00000329357	9606.ENSP00000297494	0	0	0	0	0	0.379	0	0.591	0.735
SCN5A	SCNN1B	4448544	4441549	9606.ENSP00000410257	9606.ENSP00000345751	0	0	0	0	0	0	0.72	0.089	0.734
SP1	NFKB1	4440095	4433374	9606.ENSP00000329357	9606.ENSP00000226574	0	0	0	0	0.072	0.432	0	0.535	0.734
NOS1	HSPA4	4451263	4437917	9606.ENSP00000477999	9606.ENSP00000302961	0	0	0	0	0.061	0.379	0	0.579	0.733
BCL2	C5	4446777	4433289	9606.ENSP00000381185	9606.ENSP00000223642	0	0	0	0	0	0	0.72	0.087	0.733
PARP1	SP1	4442743	4440095	9606.ENSP00000355759	9606.ENSP00000329357	0	0	0	0	0	0.379	0	0.588	0.733
ESR1	RB1	4448358	4435747	9606.ENSP00000405330	9606.ENSP00000267163	0	0	0	0	0	0.055	0	0.729	0.733
BDNF	COMT	4448727	4442480	9606.ENSP00000414303	9606.ENSP00000354511	0	0	0	0	0	0	0	0.733	0.733
AGTR1	SRC	4449040	4444215	9606.ENSP00000419422	9606.ENSP00000362680	0	0	0	0	0	0.266	0	0.65	0.732
TH	SHH	4445511	4437380	9606.ENSP00000370571	9606.ENSP00000297261	0	0	0	0	0.062	0	0	0.725	0.732
NR3C2	SCNN1G	4442077	4437627	9606.ENSP00000350815	9606.ENSP00000300061	0	0	0	0	0	0.05	0	0.729	0.732
HSPB2	STAT3	4437856	4435468	9606.ENSP00000302476	9606.ENSP00000264657	0	0	0	0	0	0.187	0	0.685	0.732
NR1H3	SIRT1	4451232	4432849	9606.ENSP00000477707	9606.ENSP00000212015	0	0	0	0	0	0.472	0	0.512	0.731
CRH	IL1B	4436231	4435241	9606.ENSP00000276571	9606.ENSP00000263341	0	0	0	0	0	0	0	0.731	0.731
TLR7	VCAM1	4445433	4437090	9606.ENSP00000370034	9606.ENSP00000294728	0	0	0	0	0.512	0	0	0.472	0.731
PPARG	REN	4436745	4436004	9606.ENSP00000287820	9606.ENSP00000272190	0	0	0	0	0	0	0	0.731	0.731
AR	CEBPB	4444436	4438125	9606.ENSP00000363822	9606.ENSP00000305422	0	0	0	0	0	0.344	0	0.607	0.731
NOS3	TP53	4437409	4435880	9606.ENSP00000297494	9606.ENSP00000269305	0	0	0	0	0	0	0	0.731	0.731
EDN1	IL1B	4445200	4435241	9606.ENSP00000368683	9606.ENSP00000263341	0	0	0	0	0.062	0	0	0.725	0.731
HTR2A	CACNA1C	4449830	4435696	9606.ENSP00000437737	9606.ENSP00000266376	0	0	0	0	0.107	0.057	0.6	0.295	0.73
PDGFA	IGF1R	4441629	4435797	9606.ENSP00000346508	9606.ENSP00000268035	0	0	0	0	0	0	0.6	0.355	0.73
NOS3	IL1B	4437409	4435241	9606.ENSP00000297494	9606.ENSP00000263341	0	0	0	0	0.062	0	0	0.723	0.729
AKT1	NR3C1	4450372	4433539	9606.ENSP00000451828	9606.ENSP00000231509	0	0	0	0	0	0.407	0	0.561	0.728
CD34	C5	4438554	4433289	9606.ENSP00000310036	9606.ENSP00000223642	0	0	0	0	0	0	0.72	0.068	0.728
FGF1	IGF1R	4451524	4435797	9606.ENSP00000480791	9606.ENSP00000268035	0	0	0	0	0	0.05	0.6	0.343	0.728
TNF	CEBPB	4448041	4438125	9606.ENSP00000398698	9606.ENSP00000305422	0	0	0	0	0.085	0	0	0.714	0.727
CD34	VCAM1	4438554	4437090	9606.ENSP00000310036	9606.ENSP00000294728	0	0	0	0	0.062	0	0	0.721	0.727
AKT1	SELP	4450372	4435297	9606.ENSP00000451828	9606.ENSP00000263686	0	0	0	0	0	0.063	0	0.719	0.726
HIF1A	XBP1	4449842	4432900	9606.ENSP00000437955	9606.ENSP00000216037	0	0	0	0	0.061	0.379	0	0.568	0.726
NOS3	MAPK1	4437409	4432880	9606.ENSP00000297494	9606.ENSP00000215832	0	0	0	0	0.05	0	0	0.723	0.726
FOS	IL4	4438204	4433533	9606.ENSP00000306245	9606.ENSP00000231449	0	0	0	0	0	0	0	0.726	0.726
JUND	MAPK14	4434256	4433482	9606.ENSP00000252818	9606.ENSP00000229795	0	0	0	0	0	0.111	0.6	0.293	0.726
PTEN	SGK1	4443848	4442972	9606.ENSP00000361021	9606.ENSP00000356832	0	0	0	0	0.062	0.185	0	0.67	0.725
NPPA	REN	4444735	4436004	9606.ENSP00000365663	9606.ENSP00000272190	0	0	0	0	0	0	0	0.725	0.725
USF1	TP53	4443013	4435880	9606.ENSP00000357000	9606.ENSP00000269305	0	0	0	0	0	0.268	0	0.638	0.724
BDNF	REST	4448727	4438728	9606.ENSP00000414303	9606.ENSP00000311816	0	0	0	0	0	0	0	0.724	0.724
AKT1	SP1	4450372	4440095	9606.ENSP00000451828	9606.ENSP00000329357	0	0	0	0	0.055	0.08	0	0.707	0.723
CAV1	CACNA1C	4440933	4435696	9606.ENSP00000339191	9606.ENSP00000266376	0	0	0	0	0	0.044	0	0.722	0.723
ATM	SIRT1	4436300	4432849	9606.ENSP00000278616	9606.ENSP00000212015	0	0	0	0	0.063	0	0	0.716	0.723
SMAD4	SHH	4441161	4437380	9606.ENSP00000341551	9606.ENSP00000297261	0	0	0	0	0	0	0	0.72	0.721
KAT5	STAT3	4441035	4435468	9606.ENSP00000340330	9606.ENSP00000264657	0	0	0	0	0.052	0.384	0	0.561	0.721
IL10	HSPA4	4448642	4437917	9606.ENSP00000412237	9606.ENSP00000302961	0	0	0	0	0	0	0	0.72	0.72
EDN1	NPPA	4445200	4444735	9606.ENSP00000368683	9606.ENSP00000365663	0	0	0	0	0	0	0	0.72	0.72
SMARCA4	PARP1	4447900	4442743	9606.ENSP00000395654	9606.ENSP00000355759	0	0	0	0	0.118	0.269	0	0.6	0.72
TNF	PTEN	4448041	4443848	9606.ENSP00000398698	9606.ENSP00000361021	0	0	0	0	0	0	0	0.719	0.719
PPARG	SERPINE1	4436745	4433266	9606.ENSP00000287820	9606.ENSP00000223095	0	0	0	0	0.057	0.051	0	0.711	0.719
TH	MAPK3	4445511	4435180	9606.ENSP00000370571	9606.ENSP00000263025	0	0	0	0	0	0.432	0	0.525	0.718
CALR	HSPA4	4439395	4437917	9606.ENSP00000320866	9606.ENSP00000302961	0	0	0	0	0.108	0.059	0	0.692	0.718
SELP	MPO	4435297	4433305	9606.ENSP00000263686	9606.ENSP00000225275	0	0	0	0	0.096	0.051	0	0.697	0.718
CD34	POU5F1	4438554	4434735	9606.ENSP00000310036	9606.ENSP00000259915	0	0	0	0	0	0	0	0.718	0.718
ADIPOQ	ABCA1	4447630	4444444	9606.ENSP00000389814	9606.ENSP00000363868	0	0	0	0	0.062	0	0	0.711	0.718
TLR3	IL1B	4437339	4435241	9606.ENSP00000296795	9606.ENSP00000263341	0	0	0	0	0.061	0	0	0.711	0.717
ABCG1	SREBF1	4442587	4441794	9606.ENSP00000354995	9606.ENSP00000348069	0	0	0	0	0.055	0	0	0.713	0.717
CAV1	PPARG	4440933	4436745	9606.ENSP00000339191	9606.ENSP00000287820	0	0	0	0	0.071	0.466	0	0.473	0.716
HIF1A	SIRT1	4449842	4432849	9606.ENSP00000437955	9606.ENSP00000212015	0	0	0	0	0.077	0.379	0	0.545	0.716
CYP3A4	ABCG2	4440831	4433689	9606.ENSP00000337915	9606.ENSP00000237612	0	0	0	0	0	0.05	0	0.713	0.716
CEBPB	RB1	4438125	4435747	9606.ENSP00000305422	9606.ENSP00000267163	0	0	0	0	0	0.472	0	0.484	0.716
CALCA	UCHL1	4440295	4436586	9606.ENSP00000331746	9606.ENSP00000284440	0	0	0	0	0.061	0	0	0.71	0.716
AKT1	TGFB1	4450372	4433189	9606.ENSP00000451828	9606.ENSP00000221930	0	0	0	0	0.076	0.18	0	0.654	0.715
LTA	IL4	4448275	4433533	9606.ENSP00000403495	9606.ENSP00000231449	0	0	0	0	0	0	0	0.715	0.715
CTNNB1	SHH	4441426	4437380	9606.ENSP00000344456	9606.ENSP00000297261	0	0	0	0	0	0	0	0.714	0.714
HDAC9	JUN	4448493	4443699	9606.ENSP00000408617	9606.ENSP00000360266	0	0	0	0	0	0.392	0	0.548	0.714
OPRM1	COMT	4447859	4442480	9606.ENSP00000394624	9606.ENSP00000354511	0	0	0	0	0	0	0	0.714	0.714
CDC42	ABCA1	4446990	4444444	9606.ENSP00000383118	9606.ENSP00000363868	0	0	0	0	0	0.404	0	0.539	0.714
SGK1	PIK3CA	4442972	4435346	9606.ENSP00000356832	9606.ENSP00000263967	0	0	0	0	0	0.466	0	0.487	0.714
GHRL	ADRB2	4440636	4438121	9606.ENSP00000335074	9606.ENSP00000305372	0	0	0	0	0	0	0.6	0.313	0.713
DRD2	GRIA2	4442557	4437302	9606.ENSP00000354859	9606.ENSP00000296526	0	0	0	0	0.107	0.434	0	0.478	0.713
AR	STUB1	4444436	4433095	9606.ENSP00000363822	9606.ENSP00000219548	0	0	0	0	0	0.406	0	0.537	0.713
EDN1	NOS2	4445200	4439909	9606.ENSP00000368683	9606.ENSP00000327251	0	0	0	0	0.049	0	0	0.709	0.712
IL6ST	IL4	4445526	4433533	9606.ENSP00000370698	9606.ENSP00000231449	0	0	0	0	0	0	0.6	0.31	0.712
CASP3	HSPA4	4438651	4437917	9606.ENSP00000311032	9606.ENSP00000302961	0	0	0	0	0	0.064	0	0.705	0.712
TNF	SREBF1	4448041	4441794	9606.ENSP00000398698	9606.ENSP00000348069	0	0	0	0	0	0	0	0.711	0.711
JUN	PTGS2	4443699	4442894	9606.ENSP00000360266	9606.ENSP00000356438	0	0	0	0	0.066	0	0	0.704	0.711
AKT1	GHRL	4450372	4440636	9606.ENSP00000451828	9606.ENSP00000335074	0	0	0	0	0	0	0	0.71	0.71
IL10	NOS3	4448642	4437409	9606.ENSP00000412237	9606.ENSP00000297494	0	0	0	0	0	0	0	0.708	0.709
TLR3	TP53	4437339	4435880	9606.ENSP00000296795	9606.ENSP00000269305	0	0	0	0	0	0	0	0.709	0.709
CD34	MPO	4438554	4433305	9606.ENSP00000310036	9606.ENSP00000225275	0	0	0	0	0.065	0	0	0.702	0.709
NOS3	PTGIS	4437409	4433877	9606.ENSP00000297494	9606.ENSP00000244043	0.042	0	0	0	0.062	0.066	0	0.694	0.709
ADRB1	REN	4443292	4436004	9606.ENSP00000358301	9606.ENSP00000272190	0	0	0	0	0	0	0	0.707	0.707
AKT1	AGTR1	4450372	4449040	9606.ENSP00000451828	9606.ENSP00000419422	0	0	0	0	0	0.072	0	0.698	0.707
ACTB	TP53	4441991	4435880	9606.ENSP00000349960	9606.ENSP00000269305	0	0	0	0	0.061	0.101	0	0.68	0.706
TLR3	IL4	4437339	4433533	9606.ENSP00000296795	9606.ENSP00000231449	0	0	0	0	0	0	0	0.705	0.705
ALOX5AP	ALOX15	4451430	4450608	9606.ENSP00000479870	9606.ENSP00000458832	0	0	0	0	0.057	0.18	0	0.65	0.705
GRIN2B	AKT1	4451206	4450372	9606.ENSP00000477455	9606.ENSP00000451828	0	0	0	0	0	0.127	0	0.675	0.704
TLR7	IL4	4445433	4433533	9606.ENSP00000370034	9606.ENSP00000231449	0	0	0	0	0	0	0	0.703	0.703
EDN1	CAV1	4445200	4440933	9606.ENSP00000368683	9606.ENSP00000339191	0	0	0	0	0.103	0	0	0.682	0.703
REN	CRP	4436004	4434405	9606.ENSP00000272190	9606.ENSP00000255030	0	0	0	0	0	0	0	0.703	0.703
AGT	TGFB1	4442719	4433189	9606.ENSP00000355627	9606.ENSP00000221930	0	0	0	0	0	0	0	0.702	0.702
AKT1	AGT	4450372	4442719	9606.ENSP00000451828	9606.ENSP00000355627	0	0	0	0	0	0	0	0.702	0.702
TLR7	IL1B	4445433	4435241	9606.ENSP00000370034	9606.ENSP00000263341	0	0	0	0	0.091	0	0	0.685	0.701
PLA2G1B	CRP	4438770	4434405	9606.ENSP00000312286	9606.ENSP00000255030	0	0	0	0	0	0	0	0.701	0.701
SCNN1A	NR3C2	4442340	4442077	9606.ENSP00000353292	9606.ENSP00000350815	0	0	0	0	0.06	0.05	0	0.692	0.701
TNF	ACTB	4448041	4441991	9606.ENSP00000398698	9606.ENSP00000349960	0	0	0	0	0	0.261	0	0.612	0.701
TAC1	UCHL1	4439413	4436586	9606.ENSP00000321106	9606.ENSP00000284440	0	0	0	0	0.13	0	0	0.67	0.7
ADRA2B	REN	4451505	4436004	9606.ENSP00000480573	9606.ENSP00000272190	0	0	0	0	0	0	0	0.7	0.7
CDC42	JUN	4446990	4443699	9606.ENSP00000383118	9606.ENSP00000360266	0	0	0	0	0.062	0.22	0	0.623	0.7
ADRA2C	REN	4447303	4436004	9606.ENSP00000386069	9606.ENSP00000272190	0	0	0	0	0	0	0	0.7	0.7
SMARCA4	ATM	4447900	4436300	9606.ENSP00000395654	9606.ENSP00000278616	0	0	0	0	0.061	0.064	0	0.685	0.7
IL4	TGFB1	4433533	4433189	9606.ENSP00000231449	9606.ENSP00000221930	0	0	0	0	0	0	0	0.7	0.7
IL10	VCAM1	4448642	4437090	9606.ENSP00000412237	9606.ENSP00000294728	0	0	0	0	0.055	0	0	0.696	0.7
ADIPOQ	AGT	4447630	4442719	9606.ENSP00000389814	9606.ENSP00000355627	0	0	0	0	0	0	0	0.7	0.7
BDNF	ADORA2A	4448727	4440713	9606.ENSP00000414303	9606.ENSP00000336630	0	0	0	0	0	0	0	0.699	0.7
HMGB1	SIRT1	4441512	4432849	9606.ENSP00000345347	9606.ENSP00000212015	0	0	0	0	0.097	0.095	0	0.662	0.7
PTGS2	MPO	4442894	4433305	9606.ENSP00000356438	9606.ENSP00000225275	0	0	0	0	0.065	0	0	0.691	0.699
FOS	NFKB1	4438204	4433374	9606.ENSP00000306245	9606.ENSP00000226574	0	0	0	0	0.051	0.402	0	0.512	0.699
SMAD4	SIRT1	4441161	4432849	9606.ENSP00000341551	9606.ENSP00000212015	0	0	0	0	0.202	0.064	0	0.629	0.699
AR	JUND	4444436	4434256	9606.ENSP00000363822	9606.ENSP00000252818	0	0	0	0	0	0.405	0	0.514	0.699
CASP3	MPO	4438651	4433305	9606.ENSP00000311032	9606.ENSP00000225275	0	0	0	0	0	0	0	0.699	0.699
NOS3	MAPK3	4437409	4435180	9606.ENSP00000297494	9606.ENSP00000263025	0	0	0	0	0.05	0	0	0.695	0.698
SGK1	NR3C2	4442972	4442077	9606.ENSP00000356832	9606.ENSP00000350815	0	0	0	0	0.061	0.081	0	0.678	0.698
IL10	NOS2	4448642	4439909	9606.ENSP00000412237	9606.ENSP00000327251	0	0	0	0	0	0	0	0.696	0.696
PTK2B	GRIN1	4446690	4443769	9606.ENSP00000380638	9606.ENSP00000360608	0	0	0	0	0.089	0.185	0.54	0.216	0.696
EDN1	SERPINE1	4445200	4433266	9606.ENSP00000368683	9606.ENSP00000223095	0	0	0	0	0.088	0	0	0.679	0.695
AKT1	PPARG	4450372	4436745	9606.ENSP00000451828	9606.ENSP00000287820	0	0	0	0	0.061	0.085	0	0.674	0.695
PTEN	POU5F1	4443848	4434735	9606.ENSP00000361021	9606.ENSP00000259915	0	0	0	0	0	0	0	0.695	0.695
NOS3	STAT3	4437409	4435468	9606.ENSP00000297494	9606.ENSP00000264657	0	0	0	0	0	0	0	0.695	0.695
BDNF	IL4	4448727	4433533	9606.ENSP00000414303	9606.ENSP00000231449	0	0	0	0	0	0	0	0.695	0.695
PDE1C	CALM3	4446517	4436903	9606.ENSP00000379496	9606.ENSP00000291295	0	0	0	0	0.062	0.371	0	0.524	0.694
P4HB	HSPA4	4439955	4437917	9606.ENSP00000327801	9606.ENSP00000302961	0	0	0	0	0.078	0.162	0	0.636	0.694
PLG	ACE	4438461	4436887	9606.ENSP00000308938	9606.ENSP00000290866	0	0	0	0	0	0	0	0.693	0.693
SMAD4	PIK3CA	4441161	4435346	9606.ENSP00000341551	9606.ENSP00000263967	0	0	0	0	0.062	0	0	0.686	0.693
TP53	TGFB1	4435880	4433189	9606.ENSP00000269305	9606.ENSP00000221930	0	0	0	0	0.061	0.255	0	0.597	0.693
TH	CRH	4445511	4436231	9606.ENSP00000370571	9606.ENSP00000276571	0	0	0	0	0.063	0	0	0.684	0.692
JUN	CASP8	4443699	4442125	9606.ENSP00000360266	9606.ENSP00000351273	0	0	0	0	0	0.069	0	0.683	0.692
SP1	ATM	4440095	4436300	9606.ENSP00000329357	9606.ENSP00000278616	0	0	0	0	0.061	0	0	0.685	0.692
HSPA4	NOS3	4437917	4437409	9606.ENSP00000302961	9606.ENSP00000297494	0	0	0	0	0.061	0	0	0.685	0.692
SRC	ACTB	4444215	4441991	9606.ENSP00000362680	9606.ENSP00000349960	0	0	0	0	0.054	0.402	0	0.5	0.692
PARP1	MAPK3	4442743	4435180	9606.ENSP00000355759	9606.ENSP00000263025	0	0	0	0	0.063	0.379	0	0.512	0.691
HIF1A	TNF	4449842	4448041	9606.ENSP00000437955	9606.ENSP00000398698	0	0	0	0	0	0	0	0.69	0.69
PDE1A	CALM2	4448547	4436014	9606.ENSP00000410309	9606.ENSP00000272298	0	0	0	0	0.062	0.614	0	0.214	0.69
CALM1	PRKACA	4441930	4438521	9606.ENSP00000349467	9606.ENSP00000309591	0	0	0	0	0.063	0	0.6	0.24	0.69
FOS	SIRT1	4438204	4432849	9606.ENSP00000306245	9606.ENSP00000212015	0	0	0	0	0	0.472	0	0.438	0.69
HIF1A	PARP1	4449842	4442743	9606.ENSP00000437955	9606.ENSP00000355759	0	0	0	0	0	0.379	0	0.519	0.689
HSPA4	IL1B	4437917	4435241	9606.ENSP00000302961	9606.ENSP00000263341	0	0	0	0	0	0	0	0.689	0.689
BDNF	ESR1	4448727	4448358	9606.ENSP00000414303	9606.ENSP00000405330	0	0	0	0	0	0.379	0	0.52	0.689
TNF	ABCA1	4448041	4444444	9606.ENSP00000398698	9606.ENSP00000363868	0	0	0	0	0	0	0	0.689	0.689
NR3C2	CRH	4442077	4436231	9606.ENSP00000350815	9606.ENSP00000276571	0	0	0	0	0	0	0	0.689	0.689
PPARA	PTGS2	4447242	4442894	9606.ENSP00000385523	9606.ENSP00000356438	0	0	0	0	0	0.05	0	0.686	0.689
IL6ST	CSF2	4445526	4437349	9606.ENSP00000370698	9606.ENSP00000296871	0	0	0	0	0	0	0.6	0.255	0.689
CYP3A4	PLA2G1B	4440831	4438770	9606.ENSP00000337915	9606.ENSP00000312286	0	0	0	0	0.063	0	0.65	0.126	0.688
BDNF	DRD2	4448727	4442557	9606.ENSP00000414303	9606.ENSP00000354859	0	0	0	0	0.061	0	0	0.682	0.688
TLR7	HSPA4	4445433	4437917	9606.ENSP00000370034	9606.ENSP00000302961	0	0	0	0	0	0.05	0	0.685	0.688
ADRA1A	REN	4445417	4436004	9606.ENSP00000369960	9606.ENSP00000272190	0	0	0	0	0.062	0	0	0.679	0.686
VCAM1	SERPINE1	4437090	4433266	9606.ENSP00000294728	9606.ENSP00000223095	0	0	0	0	0.062	0	0	0.679	0.686
ABCA1	CAV1	4444444	4440933	9606.ENSP00000363868	9606.ENSP00000339191	0	0	0	0	0	0	0	0.686	0.686
CAV1	STAT3	4440933	4435468	9606.ENSP00000339191	9606.ENSP00000264657	0	0	0	0	0	0	0	0.685	0.685
TP53	IL4	4435880	4433533	9606.ENSP00000269305	9606.ENSP00000231449	0	0	0	0	0	0	0	0.685	0.685
NOS1	BDNF	4451263	4448727	9606.ENSP00000477999	9606.ENSP00000414303	0	0	0	0	0	0	0	0.685	0.685
ESR1	ABCG2	4448358	4433689	9606.ENSP00000405330	9606.ENSP00000237612	0	0	0	0	0	0.076	0	0.673	0.685
PTGS2	CASP3	4442894	4438651	9606.ENSP00000356438	9606.ENSP00000311032	0	0	0	0	0	0	0	0.685	0.685
HIF1A	SERPINE1	4449842	4433266	9606.ENSP00000437955	9606.ENSP00000223095	0	0	0	0	0.076	0	0	0.672	0.684
CASP3	ATM	4438651	4436300	9606.ENSP00000311032	9606.ENSP00000278616	0	0	0	0	0	0	0	0.684	0.684
CACNA1B	CAV1	4443731	4440933	9606.ENSP00000360423	9606.ENSP00000339191	0	0	0	0	0	0.044	0	0.683	0.684
PLG	SELP	4438461	4435297	9606.ENSP00000308938	9606.ENSP00000263686	0	0	0	0	0.061	0	0	0.677	0.684
SRC	HSPB2	4444215	4437856	9606.ENSP00000362680	9606.ENSP00000302476	0	0	0	0	0	0.078	0	0.67	0.684
BDNF	TAC1	4448727	4439413	9606.ENSP00000414303	9606.ENSP00000321106	0	0	0	0	0.081	0	0	0.67	0.683
BDNF	CASP3	4448727	4438651	9606.ENSP00000414303	9606.ENSP00000311032	0	0	0	0	0	0	0	0.683	0.683
BDNF	MAPK3	4448727	4435180	9606.ENSP00000414303	9606.ENSP00000263025	0	0	0	0	0	0	0	0.683	0.683
SRC	CASP3	4444215	4438651	9606.ENSP00000362680	9606.ENSP00000311032	0	0	0	0	0	0.064	0	0.675	0.683
CEBPB	NR3C1	4438125	4433539	9606.ENSP00000305422	9606.ENSP00000231509	0	0	0	0	0.062	0.344	0	0.527	0.683
IL10	ADORA2A	4448642	4440713	9606.ENSP00000412237	9606.ENSP00000336630	0	0	0	0	0	0	0	0.682	0.682
BDNF	GHRL	4448727	4440636	9606.ENSP00000414303	9606.ENSP00000335074	0	0	0	0	0	0	0	0.682	0.682
TNF	CD34	4448041	4438554	9606.ENSP00000398698	9606.ENSP00000310036	0	0	0	0	0	0	0	0.682	0.682
CALCA	IL1B	4440295	4435241	9606.ENSP00000331746	9606.ENSP00000263341	0	0	0	0	0	0	0	0.681	0.681
SREBF1	FADS2	4441794	4436312	9606.ENSP00000348069	9606.ENSP00000278840	0	0	0	0	0.062	0	0	0.673	0.681
ANXA1	TP53	4444796	4435880	9606.ENSP00000366109	9606.ENSP00000269305	0	0	0	0	0	0	0	0.681	0.681
HMGB1	TLR3	4441512	4437339	9606.ENSP00000345347	9606.ENSP00000296795	0	0	0	0	0	0.051	0	0.678	0.681
SMAD3	HSPA4	4440414	4437917	9606.ENSP00000332973	9606.ENSP00000302961	0	0	0	0	0	0.379	0	0.507	0.681
ABCB1	CYP2B6	4451279	4439703	9606.ENSP00000478255	9606.ENSP00000324648	0	0	0	0	0.062	0	0	0.673	0.68
TNF	PLG	4448041	4438461	9606.ENSP00000398698	9606.ENSP00000308938	0	0	0	0	0	0	0	0.68	0.68
AGT	CRP	4442719	4434405	9606.ENSP00000355627	9606.ENSP00000255030	0	0	0	0	0.103	0	0	0.657	0.679
PTEN	ABCG2	4443848	4433689	9606.ENSP00000361021	9606.ENSP00000237612	0	0	0	0	0.062	0	0	0.671	0.679
AGT	FOS	4442719	4438204	9606.ENSP00000355627	9606.ENSP00000306245	0	0	0	0	0	0	0	0.679	0.679
TH	UCHL1	4445511	4436586	9606.ENSP00000370571	9606.ENSP00000284440	0	0	0	0	0.062	0	0	0.672	0.679
SERPINE1	SIRT1	4433266	4432849	9606.ENSP00000223095	9606.ENSP00000212015	0.042	0	0	0	0	0	0	0.679	0.679
OPRM1	SLC6A4	4447859	4434929	9606.ENSP00000394624	9606.ENSP00000261707	0	0	0	0	0	0.073	0	0.668	0.679
TNF	HMGB1	4448041	4441512	9606.ENSP00000398698	9606.ENSP00000345347	0	0	0	0	0	0	0	0.678	0.678
GHRL	SIRT1	4440636	4432849	9606.ENSP00000335074	9606.ENSP00000212015	0	0	0	0	0	0	0	0.677	0.678
OPRM1	CRH	4447859	4436231	9606.ENSP00000394624	9606.ENSP00000276571	0	0	0	0	0	0	0	0.677	0.677
ITGB3	CD34	4450406	4438554	9606.ENSP00000452786	9606.ENSP00000310036	0	0	0	0	0	0	0	0.677	0.677
LTA	CSF2	4448275	4437349	9606.ENSP00000403495	9606.ENSP00000296871	0	0	0	0	0.09	0	0	0.66	0.677
HMGB1	VCAM1	4441512	4437090	9606.ENSP00000345347	9606.ENSP00000294728	0	0	0	0	0	0.044	0	0.675	0.677
NOS3	MPO	4437409	4433305	9606.ENSP00000297494	9606.ENSP00000225275	0	0	0	0	0	0.157	0	0.633	0.677
TLR7	CSF2	4445433	4437349	9606.ENSP00000370034	9606.ENSP00000296871	0	0	0	0	0	0	0	0.677	0.677
JUN	SREBF1	4443699	4441794	9606.ENSP00000360266	9606.ENSP00000348069	0	0	0	0	0.061	0	0	0.669	0.677
ACTB	CTNNB1	4441991	4441426	9606.ENSP00000349960	9606.ENSP00000344456	0	0	0	0	0.064	0.321	0	0.533	0.677
ATP13A2	UCHL1	4439906	4436586	9606.ENSP00000327214	9606.ENSP00000284440	0	0	0	0	0.063	0	0	0.669	0.676
IL1B	NAMPT	4435241	4433236	9606.ENSP00000263341	9606.ENSP00000222553	0	0	0	0	0.142	0	0	0.638	0.676
REN	SERPINE1	4436004	4433266	9606.ENSP00000272190	9606.ENSP00000223095	0	0	0	0	0	0	0	0.676	0.676
HSPA4	MAPK14	4437917	4433482	9606.ENSP00000302961	9606.ENSP00000229795	0	0	0	0	0	0.167	0	0.626	0.676
EDN1	CRP	4445200	4434405	9606.ENSP00000368683	9606.ENSP00000255030	0	0	0	0	0	0	0	0.676	0.676
DRD2	TAC1	4442557	4439413	9606.ENSP00000354859	9606.ENSP00000321106	0	0	0	0	0.12	0	0	0.647	0.676
HMGB1	CALR	4441512	4439395	9606.ENSP00000345347	9606.ENSP00000320866	0	0	0	0	0	0	0	0.676	0.676
PTGS2	AGT	4442894	4442719	9606.ENSP00000356438	9606.ENSP00000355627	0	0	0	0	0	0	0	0.676	0.676
SCNN1G	REN	4437627	4436004	9606.ENSP00000300061	9606.ENSP00000272190	0	0	0	0	0	0	0	0.676	0.676
ADIPOQ	NOS3	4447630	4437409	9606.ENSP00000389814	9606.ENSP00000297494	0	0	0	0	0.061	0	0	0.669	0.675
SELP	SERPINE1	4435297	4433266	9606.ENSP00000263686	9606.ENSP00000223095	0	0	0	0	0.061	0	0	0.669	0.675
AKT1	IL1B	4450372	4435241	9606.ENSP00000451828	9606.ENSP00000263341	0	0	0	0	0	0.059	0	0.669	0.675
CRH	SLC6A4	4436231	4434929	9606.ENSP00000276571	9606.ENSP00000261707	0	0	0	0	0.063	0	0	0.668	0.675
ADRB1	ACE	4443292	4436887	9606.ENSP00000358301	9606.ENSP00000290866	0	0	0	0	0.061	0	0	0.669	0.675
MAPK3	JUND	4435180	4434256	9606.ENSP00000263025	9606.ENSP00000252818	0	0	0	0	0	0.424	0	0.458	0.674
SRC	ADAM17	4444215	4438549	9606.ENSP00000362680	9606.ENSP00000309968	0	0	0	0	0	0.379	0	0.497	0.674
IL10	SMAD3	4448642	4440414	9606.ENSP00000412237	9606.ENSP00000332973	0	0	0	0	0	0	0	0.674	0.674
ADRA2A	REN	4436361	4436004	9606.ENSP00000280155	9606.ENSP00000272190	0	0	0	0	0	0	0	0.674	0.674
ACE	SELP	4436887	4435297	9606.ENSP00000290866	9606.ENSP00000263686	0	0	0	0	0	0	0	0.673	0.673
VCAM1	PPARG	4437090	4436745	9606.ENSP00000294728	9606.ENSP00000287820	0	0	0	0	0	0	0	0.673	0.673
IL1B	SIRT1	4435241	4432849	9606.ENSP00000263341	9606.ENSP00000212015	0	0	0	0	0	0	0	0.673	0.673
SRC	GRIN1	4444215	4443769	9606.ENSP00000362680	9606.ENSP00000360608	0	0	0	0	0.061	0.185	0	0.607	0.673
FGF1	NGFR	4451524	4432715	9606.ENSP00000480791	9606.ENSP00000172229	0	0	0	0	0.065	0	0.6	0.197	0.673
ADIPOQ	PPARA	4447630	4447242	9606.ENSP00000389814	9606.ENSP00000385523	0	0	0	0	0	0	0	0.673	0.673
HMGB1	TLR8	4441512	4438750	9606.ENSP00000345347	9606.ENSP00000312082	0	0	0	0	0	0.051	0	0.67	0.673
PTEN	SP1	4443848	4440095	9606.ENSP00000361021	9606.ENSP00000329357	0	0	0	0	0.063	0.065	0	0.657	0.673
TLR7	HMGB1	4445433	4441512	9606.ENSP00000370034	9606.ENSP00000345347	0	0	0	0	0	0.051	0	0.67	0.673
NOS3	SERPINE1	4437409	4433266	9606.ENSP00000297494	9606.ENSP00000223095	0	0	0	0	0.053	0	0	0.668	0.672
DBH	ADRA2A	4446100	4436361	9606.ENSP00000376776	9606.ENSP00000280155	0	0	0	0	0.061	0	0	0.665	0.672
SLC6A4	NR3C1	4434929	4433539	9606.ENSP00000261707	9606.ENSP00000231509	0	0	0	0	0	0.05	0	0.669	0.672
ADAM17	MAPK14	4438549	4433482	9606.ENSP00000309968	9606.ENSP00000229795	0	0	0	0	0	0	0	0.671	0.672
ESR1	HSPA4	4448358	4437917	9606.ENSP00000405330	9606.ENSP00000302961	0	0	0	0	0	0.421	0	0.457	0.672
PPARG	MAPK1	4436745	4432880	9606.ENSP00000287820	9606.ENSP00000215832	0	0	0	0	0	0.399	0	0.476	0.672
ADRB2	REN	4438121	4436004	9606.ENSP00000305372	9606.ENSP00000272190	0	0	0	0	0	0	0	0.671	0.671
BDNF	CRP	4448727	4434405	9606.ENSP00000414303	9606.ENSP00000255030	0	0	0	0	0	0	0	0.671	0.671
HIF1A	PPARA	4449842	4447242	9606.ENSP00000437955	9606.ENSP00000385523	0	0	0	0	0	0.095	0	0.651	0.671
DBH	SLC6A4	4446100	4434929	9606.ENSP00000376776	9606.ENSP00000261707	0	0	0	0	0.061	0	0	0.663	0.67
IL10	ADORA2B	4448642	4438057	9606.ENSP00000412237	9606.ENSP00000304501	0	0	0	0	0	0	0	0.67	0.67
SRC	NOS3	4444215	4437409	9606.ENSP00000362680	9606.ENSP00000297494	0	0	0	0	0.061	0.065	0	0.654	0.67
AKT1	CD34	4450372	4438554	9606.ENSP00000451828	9606.ENSP00000310036	0	0	0	0	0	0	0	0.67	0.67
IL1B	MAPK3	4435241	4435180	9606.ENSP00000263341	9606.ENSP00000263025	0	0	0	0	0	0	0	0.67	0.67
CD34	TP53	4438554	4435880	9606.ENSP00000310036	9606.ENSP00000269305	0	0	0	0	0	0	0	0.67	0.67
TAC1	ACE	4439413	4436887	9606.ENSP00000321106	9606.ENSP00000290866	0	0	0	0	0	0	0	0.67	0.67
TLR8	IL4	4438750	4433533	9606.ENSP00000312082	9606.ENSP00000231449	0	0	0	0	0	0	0	0.67	0.67
DBH	TAC1	4446100	4439413	9606.ENSP00000376776	9606.ENSP00000321106	0	0	0	0	0	0	0	0.67	0.67
F2	TP53	4438421	4435880	9606.ENSP00000308541	9606.ENSP00000269305	0	0	0	0	0	0	0	0.67	0.67
ATP1A2	MAPK3	4442474	4435180	9606.ENSP00000354490	9606.ENSP00000263025	0	0	0	0	0.061	0.083	0.6	0.155	0.67
VDR	REN	4450226	4436004	9606.ENSP00000447173	9606.ENSP00000272190	0	0	0	0	0	0	0	0.67	0.67
ADRA2C	DBH	4447303	4446100	9606.ENSP00000386069	9606.ENSP00000376776	0	0	0	0	0.061	0	0	0.663	0.67
DRD2	FOS	4442557	4438204	9606.ENSP00000354859	9606.ENSP00000306245	0	0	0	0	0	0	0	0.669	0.669
IL10	CASP3	4448642	4438651	9606.ENSP00000412237	9606.ENSP00000311032	0	0	0	0	0	0	0	0.669	0.669
FADS1	FADS2	4439505	4436312	9606.ENSP00000322229	9606.ENSP00000278840	0	0	0.437	0.965	0.652	0	0	0.923	0.669
CRP	IL4	4434405	4433533	9606.ENSP00000255030	9606.ENSP00000231449	0	0	0	0	0	0	0	0.669	0.669
TLR8	CSF2	4438750	4437349	9606.ENSP00000312082	9606.ENSP00000296871	0	0	0	0	0	0	0	0.668	0.668
AGTR1	NR3C2	4449040	4442077	9606.ENSP00000419422	9606.ENSP00000350815	0	0	0	0	0	0	0	0.668	0.668
NOS2	VCAM1	4439909	4437090	9606.ENSP00000327251	9606.ENSP00000294728	0	0	0	0	0	0	0	0.668	0.668
STAT3	NR3C1	4435468	4433539	9606.ENSP00000264657	9606.ENSP00000231509	0	0	0	0	0	0.386	0	0.48	0.668
SREBF1	STAT3	4441794	4435468	9606.ENSP00000348069	9606.ENSP00000264657	0	0	0	0	0	0	0	0.667	0.667
ESR1	RELA	4448358	4447098	9606.ENSP00000405330	9606.ENSP00000384273	0	0	0	0	0	0.393	0	0.473	0.666
GRIN1	DRD2	4443769	4442557	9606.ENSP00000360608	9606.ENSP00000354859	0	0	0	0	0.122	0.064	0	0.626	0.666
TNF	AGT	4448041	4442719	9606.ENSP00000398698	9606.ENSP00000355627	0	0	0	0	0	0	0	0.666	0.666
SP1	STAT3	4440095	4435468	9606.ENSP00000329357	9606.ENSP00000264657	0	0	0	0	0	0.393	0	0.473	0.666
AKT1	F2	4450372	4438421	9606.ENSP00000451828	9606.ENSP00000308541	0	0	0	0	0	0.05	0	0.662	0.665
ESR1	CASP3	4448358	4438651	9606.ENSP00000405330	9606.ENSP00000311032	0	0	0	0	0	0.058	0	0.659	0.665
AKT1	CALR	4450372	4439395	9606.ENSP00000451828	9606.ENSP00000320866	0	0	0	0	0.065	0	0	0.656	0.665
PTEN	NR3C2	4443848	4442077	9606.ENSP00000361021	9606.ENSP00000350815	0	0	0	0	0	0.064	0	0.656	0.665
SMARCA4	PTEN	4447900	4443848	9606.ENSP00000395654	9606.ENSP00000361021	0	0	0	0	0.062	0.05	0	0.655	0.665
HDAC9	SMARCA4	4448493	4447900	9606.ENSP00000408617	9606.ENSP00000395654	0	0	0	0	0.062	0.416	0	0.435	0.664
CASP3	XBP1	4438651	4432900	9606.ENSP00000311032	9606.ENSP00000216037	0	0	0	0	0	0	0	0.664	0.664
AKT1	IL4	4450372	4433533	9606.ENSP00000451828	9606.ENSP00000231449	0	0	0	0	0.062	0	0	0.656	0.664
AGTR1	CAV1	4449040	4440933	9606.ENSP00000419422	9606.ENSP00000339191	0	0	0	0	0.076	0.179	0	0.593	0.664
AKT1	NAMPT	4450372	4433236	9606.ENSP00000451828	9606.ENSP00000222553	0.042	0	0	0	0	0	0	0.662	0.663
HSPA4	IL4	4437917	4433533	9606.ENSP00000302961	9606.ENSP00000231449	0	0	0	0	0	0.053	0	0.658	0.663
SMAD3	SIRT1	4440414	4432849	9606.ENSP00000332973	9606.ENSP00000212015	0	0	0	0	0.063	0.064	0	0.646	0.663
ATP1A2	MAPK1	4442474	4432880	9606.ENSP00000354490	9606.ENSP00000215832	0	0	0	0	0.061	0.083	0.6	0.134	0.662
GC	PROC	4449184	4433614	9606.ENSP00000421725	9606.ENSP00000234071	0	0	0	0	0.662	0	0	0	0.662
SRC	STUB1	4444215	4433095	9606.ENSP00000362680	9606.ENSP00000219548	0	0	0	0	0	0.516	0	0.33	0.661
CAV1	MAPK1	4440933	4432880	9606.ENSP00000339191	9606.ENSP00000215832	0	0	0	0	0	0.379	0	0.477	0.661
ADRA2B	DBH	4451505	4446100	9606.ENSP00000480573	9606.ENSP00000376776	0	0	0	0	0.061	0	0	0.654	0.661
HDAC9	KAT5	4448493	4441035	9606.ENSP00000408617	9606.ENSP00000340330	0	0	0	0	0.063	0.186	0	0.591	0.661
ADRA2C	TAC1	4447303	4439413	9606.ENSP00000386069	9606.ENSP00000321106	0	0	0	0	0.063	0	0	0.653	0.66
ESR2	IGF1R	4441379	4435797	9606.ENSP00000343925	9606.ENSP00000268035	0	0	0	0	0	0.085	0	0.644	0.66
DBH	DRD2	4446100	4442557	9606.ENSP00000376776	9606.ENSP00000354859	0	0	0	0	0	0	0	0.66	0.66
ABCG1	CAV1	4442587	4440933	9606.ENSP00000354995	9606.ENSP00000339191	0	0	0	0	0	0	0	0.66	0.66
HSPA4	MAPK3	4437917	4435180	9606.ENSP00000302961	9606.ENSP00000263025	0	0	0	0	0	0.26	0	0.559	0.66
ATM	IGF1R	4436300	4435797	9606.ENSP00000278616	9606.ENSP00000268035	0	0	0	0	0	0	0	0.659	0.66
NOS2	IL4	4439909	4433533	9606.ENSP00000327251	9606.ENSP00000231449	0	0	0	0	0.064	0	0	0.651	0.66
CAV1	IGF1R	4440933	4435797	9606.ENSP00000339191	9606.ENSP00000268035	0	0	0	0	0	0.415	0	0.441	0.659
TNF	ACE	4448041	4436887	9606.ENSP00000398698	9606.ENSP00000290866	0	0	0	0	0	0	0	0.659	0.659
VCAM1	MPO	4437090	4433305	9606.ENSP00000294728	9606.ENSP00000225275	0	0	0	0	0	0	0	0.659	0.659
HSPB2	TP53	4437856	4435880	9606.ENSP00000302476	9606.ENSP00000269305	0	0	0	0	0	0	0	0.658	0.658
ADRA2B	TAC1	4451505	4439413	9606.ENSP00000480573	9606.ENSP00000321106	0	0	0	0	0.063	0	0	0.65	0.658
SMAD4	MAPK3	4441161	4435180	9606.ENSP00000341551	9606.ENSP00000263025	0	0	0	0	0	0.083	0	0.642	0.658
SMARCA4	KAT5	4447900	4441035	9606.ENSP00000395654	9606.ENSP00000340330	0	0	0	0	0.064	0.185	0	0.587	0.658
TAC1	ADRA2A	4439413	4436361	9606.ENSP00000321106	9606.ENSP00000280155	0	0	0	0	0.084	0	0	0.642	0.658
VKORC1	F2	4446359	4438421	9606.ENSP00000378426	9606.ENSP00000308541	0	0	0	0	0.062	0	0	0.65	0.657
SRC	CACNA1C	4444215	4435696	9606.ENSP00000362680	9606.ENSP00000266376	0	0	0	0	0	0.266	0	0.552	0.657
GRIK2	GRIN1	4447959	4443769	9606.ENSP00000397026	9606.ENSP00000360608	0	0	0	0.662	0.108	0.269	0.36	0.732	0.657
SMAD4	MAPK14	4441161	4433482	9606.ENSP00000341551	9606.ENSP00000229795	0	0	0	0	0.061	0.083	0	0.632	0.656
IL10	MAPK3	4448642	4435180	9606.ENSP00000412237	9606.ENSP00000263025	0	0	0	0	0	0	0	0.656	0.656
CDC42	PIK3CG	4446990	4442215	9606.ENSP00000383118	9606.ENSP00000352121	0	0	0	0	0.061	0.537	0	0.273	0.656
GRIN2B	HOMER1	4451206	4440558	9606.ENSP00000477455	9606.ENSP00000334382	0	0	0	0	0.061	0.181	0	0.589	0.656
IL6ST	PIK3CA	4445526	4435346	9606.ENSP00000370698	9606.ENSP00000263967	0	0	0	0	0.08	0	0.6	0.138	0.655
IL10	ADORA1	4448642	4442839	9606.ENSP00000412237	9606.ENSP00000356205	0	0	0	0	0	0	0	0.655	0.655
PARK7	GRIA2	4448989	4437302	9606.ENSP00000418770	9606.ENSP00000296526	0	0	0	0	0	0	0	0.655	0.655
AKT1	TGFB2	4450372	4442765	9606.ENSP00000451828	9606.ENSP00000355896	0	0	0	0	0	0.18	0	0.597	0.655
IL10	HMGB1	4448642	4441512	9606.ENSP00000412237	9606.ENSP00000345347	0	0	0	0	0	0	0	0.655	0.655
JUN	PARP1	4443699	4442743	9606.ENSP00000360266	9606.ENSP00000355759	0	0	0	0	0.063	0.379	0	0.455	0.655
AGT	MAPK14	4442719	4433482	9606.ENSP00000355627	9606.ENSP00000229795	0	0	0	0	0	0	0	0.654	0.654
PDE4D	CACNA1C	4441530	4435696	9606.ENSP00000345502	9606.ENSP00000266376	0	0	0	0	0.077	0	0.54	0.251	0.654
ADAM17	MAPK1	4438549	4432880	9606.ENSP00000309968	9606.ENSP00000215832	0	0	0	0	0.061	0.379	0	0.454	0.654
EDN1	PPARG	4445200	4436745	9606.ENSP00000368683	9606.ENSP00000287820	0	0	0	0	0	0	0	0.653	0.653
PTGS2	SIRT1	4442894	4432849	9606.ENSP00000356438	9606.ENSP00000212015	0	0	0	0	0	0	0	0.653	0.653
REN	IL1B	4436004	4435241	9606.ENSP00000272190	9606.ENSP00000263341	0	0	0	0	0	0	0	0.653	0.653
AGT	TP53	4442719	4435880	9606.ENSP00000355627	9606.ENSP00000269305	0	0	0	0	0	0.379	0	0.462	0.652
ADORA1	GHRL	4442839	4440636	9606.ENSP00000356205	9606.ENSP00000335074	0	0	0	0	0	0	0.6	0.167	0.652
AGT	PLG	4442719	4438461	9606.ENSP00000355627	9606.ENSP00000308938	0	0	0	0	0.23	0.129	0	0.523	0.652
SMARCA4	REST	4447900	4438728	9606.ENSP00000395654	9606.ENSP00000311816	0	0	0	0	0	0.434	0	0.409	0.651
PPARA	NOS3	4447242	4437409	9606.ENSP00000385523	9606.ENSP00000297494	0	0	0	0	0.061	0.091	0	0.624	0.651
TH	GHRL	4445511	4440636	9606.ENSP00000370571	9606.ENSP00000335074	0	0	0	0	0	0	0	0.651	0.651
AGT	VCAM1	4442719	4437090	9606.ENSP00000355627	9606.ENSP00000294728	0	0	0	0	0.088	0	0	0.632	0.65
PPARA	IL1B	4447242	4435241	9606.ENSP00000385523	9606.ENSP00000263341	0	0	0	0	0	0	0	0.65	0.65
ESR1	CALCA	4448358	4440295	9606.ENSP00000405330	9606.ENSP00000331746	0	0	0	0	0	0	0	0.649	0.649
ITGB3	CAV1	4450406	4440933	9606.ENSP00000452786	9606.ENSP00000339191	0	0	0	0	0.078	0	0.6	0.126	0.649
ABCA1	IL1B	4444444	4435241	9606.ENSP00000363868	9606.ENSP00000263341	0	0	0	0	0.066	0	0	0.64	0.649
ADAM17	TP53	4438549	4435880	9606.ENSP00000309968	9606.ENSP00000269305	0	0	0	0	0.055	0	0	0.643	0.649
ADIPOQ	REN	4447630	4436004	9606.ENSP00000389814	9606.ENSP00000272190	0	0	0	0	0	0	0	0.649	0.649
PDGFA	NGFR	4441629	4432715	9606.ENSP00000346508	9606.ENSP00000172229	0	0	0	0	0	0	0.6	0.156	0.648
RELA	COX8A	4447098	4439425	9606.ENSP00000384273	9606.ENSP00000321260	0	0	0	0	0	0	0	0.648	0.648
ABCB1	STAT3	4451279	4435468	9606.ENSP00000478255	9606.ENSP00000264657	0	0	0	0	0.062	0	0	0.64	0.648
GRIN1	FOS	4443769	4438204	9606.ENSP00000360608	9606.ENSP00000306245	0	0	0	0	0	0	0	0.648	0.648
SREBF1	NAMPT	4441794	4433236	9606.ENSP00000348069	9606.ENSP00000222553	0	0	0	0	0.051	0	0	0.644	0.648
AR	FOS	4444436	4438204	9606.ENSP00000363822	9606.ENSP00000306245	0	0	0	0	0.055	0.266	0	0.532	0.647
HDAC9	TP53	4448493	4435880	9606.ENSP00000408617	9606.ENSP00000269305	0	0	0	0	0	0.391	0	0.443	0.647
CASP3	SIRT1	4438651	4432849	9606.ENSP00000311032	9606.ENSP00000212015	0	0	0	0	0	0	0	0.647	0.647
COMT	ACE	4442480	4436887	9606.ENSP00000354511	9606.ENSP00000290866	0	0	0	0	0	0.379	0	0.455	0.647
ABCB1	SRC	4451279	4444215	9606.ENSP00000478255	9606.ENSP00000362680	0	0	0	0	0	0.057	0	0.639	0.646
FOS	ACE	4438204	4436887	9606.ENSP00000306245	9606.ENSP00000290866	0	0	0	0	0	0	0	0.645	0.646
AR	SHH	4444436	4437380	9606.ENSP00000363822	9606.ENSP00000297261	0	0	0	0	0	0	0	0.645	0.646
PARK7	DRD2	4448989	4442557	9606.ENSP00000418770	9606.ENSP00000354859	0	0	0	0	0	0.084	0	0.629	0.646
SRC	IL1B	4444215	4435241	9606.ENSP00000362680	9606.ENSP00000263341	0	0	0	0	0	0.059	0	0.64	0.646
ACTB	MAPK3	4441991	4435180	9606.ENSP00000349960	9606.ENSP00000263025	0	0	0	0	0	0.128	0	0.609	0.645
CACNA1C	HTR2B	4435696	4434624	9606.ENSP00000266376	9606.ENSP00000258400	0	0	0	0	0.061	0.057	0.6	0.117	0.645
NR3C2	CAV1	4442077	4440933	9606.ENSP00000350815	9606.ENSP00000339191	0	0	0	0	0	0.328	0	0.493	0.645
IGF1R	SIRT1	4435797	4432849	9606.ENSP00000268035	9606.ENSP00000212015	0	0	0	0	0	0.051	0	0.641	0.645
NOS1	AGT	4451263	4442719	9606.ENSP00000477999	9606.ENSP00000355627	0	0	0	0	0.053	0	0	0.639	0.644
ABCB1	CEBPB	4451279	4438125	9606.ENSP00000478255	9606.ENSP00000305422	0	0	0	0	0.055	0.384	0	0.438	0.644
SREBF1	MAPK3	4441794	4435180	9606.ENSP00000348069	9606.ENSP00000263025	0	0	0	0	0.055	0.393	0	0.429	0.644
EDN1	CSF2	4445200	4437349	9606.ENSP00000368683	9606.ENSP00000296871	0	0	0	0	0.061	0	0	0.637	0.644
NOS2	MPO	4439909	4433305	9606.ENSP00000327251	9606.ENSP00000225275	0	0	0	0	0	0.157	0	0.595	0.644
OPRM1	EDN1	4447859	4445200	9606.ENSP00000394624	9606.ENSP00000368683	0	0	0	0	0	0.157	0	0.594	0.643
ADRB2	ACE	4438121	4436887	9606.ENSP00000305372	9606.ENSP00000290866	0	0	0	0	0.049	0	0	0.641	0.643
CEBPB	TP53	4438125	4435880	9606.ENSP00000305422	9606.ENSP00000269305	0	0	0	0	0	0.379	0	0.45	0.643
SREBF1	CAV1	4441794	4440933	9606.ENSP00000348069	9606.ENSP00000339191	0	0	0	0	0	0	0	0.643	0.643
PARP1	HSPA4	4442743	4437917	9606.ENSP00000355759	9606.ENSP00000302961	0	0	0	0	0.06	0	0	0.635	0.642
CSF2	PPARG	4437349	4436745	9606.ENSP00000296871	9606.ENSP00000287820	0	0	0	0	0	0	0	0.642	0.642
ADIPOQ	FNDC5	4447630	4444192	9606.ENSP00000389814	9606.ENSP00000362570	0	0	0	0	0	0	0	0.642	0.642
HSPB2	MAPK3	4437856	4435180	9606.ENSP00000302476	9606.ENSP00000263025	0	0	0	0	0	0.157	0	0.593	0.642
CRP	NAMPT	4434405	4433236	9606.ENSP00000255030	9606.ENSP00000222553	0	0	0	0	0	0	0	0.641	0.641
ESR1	SMARCA4	4448358	4447900	9606.ENSP00000405330	9606.ENSP00000395654	0	0	0	0	0	0.404	0	0.423	0.641
F2	VCAM1	4438421	4437090	9606.ENSP00000308541	9606.ENSP00000294728	0	0	0	0	0	0	0	0.641	0.641
AR	HSPB2	4444436	4437856	9606.ENSP00000363822	9606.ENSP00000302476	0	0	0	0	0	0.379	0	0.447	0.641
CD34	IL4	4438554	4433533	9606.ENSP00000310036	9606.ENSP00000231449	0	0	0	0	0	0	0	0.641	0.641
RELA	CHRM1	4447098	4438226	9606.ENSP00000384273	9606.ENSP00000306490	0	0	0	0	0	0	0	0.641	0.641
CD34	NGFR	4438554	4432715	9606.ENSP00000310036	9606.ENSP00000172229	0	0	0	0	0	0	0	0.641	0.641
ADRB1	TAC1	4443292	4439413	9606.ENSP00000358301	9606.ENSP00000321106	0	0	0	0	0	0	0	0.641	0.641
PAK1	MAPK1	4436295	4432880	9606.ENSP00000278568	9606.ENSP00000215832	0	0	0.338	0.641	0.057	0.522	0	0.414	0.64
IL6ST	PDGFA	4445526	4441629	9606.ENSP00000370698	9606.ENSP00000346508	0	0	0	0	0	0	0.6	0.138	0.64
SRC	HMGB1	4444215	4441512	9606.ENSP00000362680	9606.ENSP00000345347	0	0	0	0	0.142	0.085	0	0.579	0.64
BDNF	ADRB2	4448727	4438121	9606.ENSP00000414303	9606.ENSP00000305372	0	0	0	0	0	0	0	0.639	0.639
NDRG2	SGK1	4450366	4442972	9606.ENSP00000451712	9606.ENSP00000356832	0	0	0	0	0	0	0	0.638	0.639
DRD2	ADORA2A	4442557	4440713	9606.ENSP00000354859	9606.ENSP00000336630	0	0	0	0.642	0.063	0.477	0	0.829	0.639
TH	MAPK1	4445511	4432880	9606.ENSP00000370571	9606.ENSP00000215832	0	0	0	0	0	0.408	0	0.414	0.639
TNF	AR	4448041	4444436	9606.ENSP00000398698	9606.ENSP00000363822	0	0	0	0	0	0	0	0.639	0.639
SGK1	TP53	4442972	4435880	9606.ENSP00000356832	9606.ENSP00000269305	0	0	0	0	0	0	0	0.638	0.638
CYP17A1	COMT	4443418	4442480	9606.ENSP00000358903	9606.ENSP00000354511	0	0	0	0	0	0	0	0.638	0.638
TNF	SRC	4448041	4444215	9606.ENSP00000398698	9606.ENSP00000362680	0	0	0	0	0	0.05	0	0.634	0.637
IL10	CD34	4448642	4438554	9606.ENSP00000412237	9606.ENSP00000310036	0	0	0	0	0	0	0	0.637	0.637
SERPINE1	NAMPT	4433266	4433236	9606.ENSP00000223095	9606.ENSP00000222553	0	0	0	0	0	0	0	0.637	0.637
TNF	HSPB2	4448041	4437856	9606.ENSP00000398698	9606.ENSP00000302476	0	0	0	0	0	0.294	0	0.507	0.637
GRIK2	GRIA2	4447959	4437302	9606.ENSP00000397026	9606.ENSP00000296526	0	0	0	0.891	0.195	0.294	0.36	0.762	0.636
MAPK3	PLAT	4435180	4433132	9606.ENSP00000263025	9606.ENSP00000220809	0	0	0	0	0.05	0.432	0	0.38	0.636
ADIPOQ	ACE	4447630	4436887	9606.ENSP00000389814	9606.ENSP00000290866	0	0	0	0	0.064	0	0	0.627	0.636
ADRA2C	TH	4447303	4445511	9606.ENSP00000386069	9606.ENSP00000370571	0	0	0	0	0.061	0	0	0.628	0.636
SCN5A	PRKACA	4448544	4438521	9606.ENSP00000410257	9606.ENSP00000309591	0	0	0	0	0.062	0	0.6	0.108	0.636
MAPK3	NGFR	4435180	4432715	9606.ENSP00000263025	9606.ENSP00000172229	0	0	0	0	0	0.379	0	0.439	0.636
BDNF	GRIN1	4448727	4443769	9606.ENSP00000414303	9606.ENSP00000360608	0	0	0	0	0.083	0	0	0.617	0.634
TNF	HSPA4	4448041	4437917	9606.ENSP00000398698	9606.ENSP00000302961	0	0	0	0	0	0	0	0.633	0.633
JUN	REN	4443699	4436004	9606.ENSP00000360266	9606.ENSP00000272190	0	0	0	0	0.061	0	0	0.625	0.633
AGTR1	PTGS2	4449040	4442894	9606.ENSP00000419422	9606.ENSP00000356438	0	0	0	0	0	0.388	0	0.425	0.633
HIF1A	SRC	4449842	4444215	9606.ENSP00000437955	9606.ENSP00000362680	0	0	0	0	0.061	0.337	0	0.457	0.632
ESR2	SCNN1G	4441379	4437627	9606.ENSP00000343925	9606.ENSP00000300061	0	0	0	0	0	0.05	0	0.628	0.632
SCNN1B	REN	4441549	4436004	9606.ENSP00000345751	9606.ENSP00000272190	0	0	0	0	0	0	0	0.631	0.631
PTK2B	GRIA2	4446690	4437302	9606.ENSP00000380638	9606.ENSP00000296526	0	0	0	0	0.062	0.05	0.54	0.207	0.631
AGTR1	CASP3	4449040	4438651	9606.ENSP00000419422	9606.ENSP00000311032	0	0	0	0	0	0.055	0	0.625	0.63
AVP	ACE	4445364	4436887	9606.ENSP00000369647	9606.ENSP00000290866	0	0	0	0	0	0	0	0.63	0.63
TAC1	ADRB2	4439413	4438121	9606.ENSP00000321106	9606.ENSP00000305372	0	0	0	0	0	0	0	0.63	0.63
CSF2	VCAM1	4437349	4437090	9606.ENSP00000296871	9606.ENSP00000294728	0	0	0	0	0	0	0	0.63	0.63
OPRM1	CALCA	4447859	4440295	9606.ENSP00000394624	9606.ENSP00000331746	0	0	0	0	0	0	0	0.63	0.63
NOS3	NR3C1	4437409	4433539	9606.ENSP00000297494	9606.ENSP00000231509	0	0	0	0	0	0.091	0	0.608	0.629
SRC	NR3C1	4444215	4433539	9606.ENSP00000362680	9606.ENSP00000231509	0	0	0	0	0	0.326	0	0.473	0.629
GHRL	NOS3	4440636	4437409	9606.ENSP00000335074	9606.ENSP00000297494	0	0	0	0	0	0	0	0.628	0.628
ESR1	CYP17A1	4448358	4443418	9606.ENSP00000405330	9606.ENSP00000358903	0	0	0	0	0.061	0.085	0	0.601	0.627
CASP8	PAWR	4442125	4439982	9606.ENSP00000351273	9606.ENSP00000328088	0	0	0	0	0	0	0	0.627	0.627
FGF1	TP53	4451524	4435880	9606.ENSP00000480791	9606.ENSP00000269305	0	0	0	0	0	0	0	0.627	0.627
CAV1	SIRT1	4440933	4432849	9606.ENSP00000339191	9606.ENSP00000212015	0	0	0	0	0	0	0	0.627	0.627
SMARCA4	AR	4447900	4444436	9606.ENSP00000395654	9606.ENSP00000363822	0	0	0	0	0	0.404	0	0.4	0.627
GOT1	TAC1	4443556	4439413	9606.ENSP00000359539	9606.ENSP00000321106	0	0	0	0	0	0	0	0.626	0.626
SP1	CASP3	4440095	4438651	9606.ENSP00000329357	9606.ENSP00000311032	0	0	0	0	0	0.384	0	0.417	0.626
VDR	JUN	4450226	4443699	9606.ENSP00000447173	9606.ENSP00000360266	0	0	0	0	0	0.405	0	0.397	0.626
P2RY1	ADORA2B	4438073	4438057	9606.ENSP00000304767	9606.ENSP00000304501	0	0	0	0	0.064	0.064	0	0.607	0.626
GRIN2B	GRIK2	4451206	4447959	9606.ENSP00000477455	9606.ENSP00000397026	0	0	0	0.611	0.118	0.159	0.36	0.72	0.626
VDR	FOS	4450226	4438204	9606.ENSP00000447173	9606.ENSP00000306245	0	0	0	0	0	0.415	0	0.386	0.626
BDNF	AR	4448727	4444436	9606.ENSP00000414303	9606.ENSP00000363822	0	0	0	0	0	0	0	0.625	0.625
REN	TGFB1	4436004	4433189	9606.ENSP00000272190	9606.ENSP00000221930	0	0	0	0	0	0	0	0.625	0.625
IL10	SELP	4448642	4435297	9606.ENSP00000412237	9606.ENSP00000263686	0	0	0	0	0.061	0	0	0.618	0.625
PTGS2	REN	4442894	4436004	9606.ENSP00000356438	9606.ENSP00000272190	0	0	0	0	0.088	0	0	0.605	0.625
JUN	HSPA4	4443699	4437917	9606.ENSP00000360266	9606.ENSP00000302961	0	0	0	0	0	0.168	0	0.567	0.624
RELA	CTNNB1	4447098	4441426	9606.ENSP00000384273	9606.ENSP00000344456	0	0	0	0	0	0.472	0	0.318	0.624
OPRM1	IL1B	4447859	4435241	9606.ENSP00000394624	9606.ENSP00000263341	0	0	0	0	0	0	0	0.624	0.624
HIF1A	IL10	4449842	4448642	9606.ENSP00000437955	9606.ENSP00000412237	0	0	0	0	0	0	0	0.624	0.624
AKT1	PAWR	4450372	4439982	9606.ENSP00000451828	9606.ENSP00000328088	0	0	0	0	0	0	0	0.624	0.624
NQO1	HSPA4	4439310	4437917	9606.ENSP00000319788	9606.ENSP00000302961	0	0	0	0	0	0.379	0	0.42	0.624
SLC8A1	CACNA1C	4447160	4435696	9606.ENSP00000384763	9606.ENSP00000266376	0	0	0	0	0.119	0	0	0.59	0.623
HIF1A	ATM	4449842	4436300	9606.ENSP00000437955	9606.ENSP00000278616	0	0	0	0	0.061	0.379	0	0.405	0.623
TH	ADRA1A	4445511	4445417	9606.ENSP00000370571	9606.ENSP00000369960	0	0	0	0	0	0	0	0.622	0.622
SREBF1	FADS1	4441794	4439505	9606.ENSP00000348069	9606.ENSP00000322229	0	0	0	0	0.061	0	0	0.614	0.622
AR	ACTB	4444436	4441991	9606.ENSP00000363822	9606.ENSP00000349960	0	0	0	0	0	0.3	0	0.482	0.622
ATP1A2	PRKACA	4442474	4438521	9606.ENSP00000354490	9606.ENSP00000309591	0	0	0	0	0.064	0.064	0.6	0.05	0.622
JUN	POU5F1	4443699	4434735	9606.ENSP00000360266	9606.ENSP00000259915	0	0	0	0	0.048	0	0	0.619	0.622
ADIPOQ	PLG	4447630	4438461	9606.ENSP00000389814	9606.ENSP00000308938	0	0	0	0	0	0	0	0.621	0.621
SP1	CEBPB	4440095	4438125	9606.ENSP00000329357	9606.ENSP00000305422	0	0	0	0	0	0.393	0	0.401	0.621
APRT	NQO1	4445041	4439310	9606.ENSP00000367615	9606.ENSP00000319788	0	0	0	0	0	0	0	0.621	0.621
SREBF1	CEBPB	4441794	4438125	9606.ENSP00000348069	9606.ENSP00000305422	0	0	0	0	0.088	0.128	0	0.562	0.621
PTGS1	PTGER1	4442503	4436972	9606.ENSP00000354612	9606.ENSP00000292513	0	0	0	0	0	0.127	0	0.584	0.621
AKT1	PLG	4450372	4438461	9606.ENSP00000451828	9606.ENSP00000308938	0	0	0	0	0.061	0.05	0	0.608	0.62
CTNNB1	MAPK3	4441426	4435180	9606.ENSP00000344456	9606.ENSP00000263025	0	0	0	0	0.062	0.063	0	0.603	0.62
SCN5A	SGK1	4448544	4442972	9606.ENSP00000410257	9606.ENSP00000356832	0	0	0	0	0	0.084	0	0.601	0.619
VCAM1	MAPK14	4437090	4433482	9606.ENSP00000294728	9606.ENSP00000229795	0	0	0	0	0	0	0	0.619	0.619
NQO1	FOS	4439310	4438204	9606.ENSP00000319788	9606.ENSP00000306245	0	0	0	0	0	0.379	0	0.412	0.619
HIF1A	AR	4449842	4444436	9606.ENSP00000437955	9606.ENSP00000363822	0	0	0	0	0	0.413	0	0.378	0.619
ACE	TGFB1	4436887	4433189	9606.ENSP00000290866	9606.ENSP00000221930	0	0	0	0	0	0	0	0.619	0.619
CASP8	CTNNB1	4442125	4441426	9606.ENSP00000351273	9606.ENSP00000344456	0	0	0	0	0	0.387	0	0.404	0.619
ATM	MAPK14	4436300	4433482	9606.ENSP00000278616	9606.ENSP00000229795	0	0	0	0	0	0.321	0	0.46	0.618
NOS1	PTGS2	4451263	4442894	9606.ENSP00000477999	9606.ENSP00000356438	0	0	0	0	0	0.299	0	0.478	0.618
CALCA	FOS	4440295	4438204	9606.ENSP00000331746	9606.ENSP00000306245	0	0	0	0	0	0	0	0.617	0.617
TNF	CDC42	4448041	4446990	9606.ENSP00000398698	9606.ENSP00000383118	0	0	0	0	0.052	0.336	0	0.441	0.617
IGF1R	POU5F1	4435797	4434735	9606.ENSP00000268035	9606.ENSP00000259915	0	0	0	0	0	0	0	0.616	0.616
GC	F2	4449184	4438421	9606.ENSP00000421725	9606.ENSP00000308541	0	0	0	0	0.479	0	0	0.293	0.616
AKT1	DRD2	4450372	4442557	9606.ENSP00000451828	9606.ENSP00000354859	0	0	0	0	0	0.072	0	0.603	0.616
EDN1	TGFB1	4445200	4433189	9606.ENSP00000368683	9606.ENSP00000221930	0	0	0	0	0	0	0	0.616	0.616
ESR1	ACTB	4448358	4441991	9606.ENSP00000405330	9606.ENSP00000349960	0	0	0	0	0	0.146	0	0.569	0.616
SHH	POU5F1	4437380	4434735	9606.ENSP00000297261	9606.ENSP00000259915	0	0	0	0	0	0	0	0.615	0.615
TH	ADRA2A	4445511	4436361	9606.ENSP00000370571	9606.ENSP00000280155	0	0	0	0	0	0	0	0.615	0.615
AGT	SCNN1A	4442719	4442340	9606.ENSP00000355627	9606.ENSP00000353292	0	0	0	0	0.062	0	0	0.606	0.614
F12	PROC	4434311	4433614	9606.ENSP00000253496	9606.ENSP00000234071	0	0	0.414	0.639	0.518	0	0	0.221	0.614
AGT	NR3C2	4442719	4442077	9606.ENSP00000355627	9606.ENSP00000350815	0	0	0	0	0.062	0.051	0	0.601	0.614
PTGS2	CRP	4442894	4434405	9606.ENSP00000356438	9606.ENSP00000255030	0	0	0	0	0	0	0	0.614	0.614
IL6ST	PIK3CB	4445526	4436798	9606.ENSP00000370698	9606.ENSP00000289153	0	0	0	0	0.052	0	0.6	0.064	0.614
BDNF	IL10	4448727	4448642	9606.ENSP00000414303	9606.ENSP00000412237	0	0	0	0	0	0	0	0.613	0.613
FGF1	SERPINE1	4451524	4433266	9606.ENSP00000480791	9606.ENSP00000223095	0	0	0	0	0	0	0	0.613	0.613
PLG	REN	4438461	4436004	9606.ENSP00000308938	9606.ENSP00000272190	0	0	0	0	0.064	0	0	0.603	0.613
ADORA2A	P2RY1	4440713	4438073	9606.ENSP00000336630	9606.ENSP00000304767	0	0	0	0	0.062	0.064	0	0.595	0.613
PTGS2	TGFB1	4442894	4433189	9606.ENSP00000356438	9606.ENSP00000221930	0	0	0	0	0.088	0	0	0.592	0.612
AGT	SCNN1G	4442719	4437627	9606.ENSP00000355627	9606.ENSP00000300061	0	0	0	0	0	0	0	0.612	0.612
ABCB1	CTNNB1	4451279	4441426	9606.ENSP00000478255	9606.ENSP00000344456	0	0	0	0	0	0.063	0	0.602	0.612
GC	CRP	4449184	4434405	9606.ENSP00000421725	9606.ENSP00000255030	0	0	0	0	0.231	0	0	0.517	0.612
CD34	SELP	4438554	4435297	9606.ENSP00000310036	9606.ENSP00000263686	0	0	0	0	0.137	0	0	0.568	0.611
NOS3	MAPK14	4437409	4433482	9606.ENSP00000297494	9606.ENSP00000229795	0	0	0	0	0.05	0	0	0.608	0.611
ESR2	CRH	4441379	4436231	9606.ENSP00000343925	9606.ENSP00000276571	0	0	0	0	0	0	0	0.611	0.611
VDR	MAPK3	4450226	4435180	9606.ENSP00000447173	9606.ENSP00000263025	0	0	0	0	0	0.363	0	0.413	0.61
IL1B	SLC6A4	4435241	4434929	9606.ENSP00000263341	9606.ENSP00000261707	0	0	0	0	0	0	0	0.61	0.61
RELA	VCAM1	4447098	4437090	9606.ENSP00000384273	9606.ENSP00000294728	0	0	0	0	0	0.281	0	0.481	0.61
PTK2B	STAT3	4446690	4435468	9606.ENSP00000380638	9606.ENSP00000264657	0	0	0	0	0	0.379	0	0.398	0.61
SMAD3	JUND	4440414	4434256	9606.ENSP00000332973	9606.ENSP00000252818	0	0	0	0	0	0.346	0	0.427	0.61
PTK2B	GRIN3A	4446690	4442616	9606.ENSP00000380638	9606.ENSP00000355155	0	0	0	0	0.098	0.05	0.54	0.129	0.61
CACNA1A	CAV1	4442347	4440933	9606.ENSP00000353362	9606.ENSP00000339191	0	0	0	0	0	0.044	0	0.608	0.609
IL4	MPO	4433533	4433305	9606.ENSP00000231449	9606.ENSP00000225275	0	0	0	0	0	0	0	0.609	0.609
NPPA	ACE	4444735	4436887	9606.ENSP00000365663	9606.ENSP00000290866	0	0	0	0	0.061	0	0	0.601	0.609
TNF	CX3CR1	4448041	4442101	9606.ENSP00000398698	9606.ENSP00000351059	0	0	0	0	0	0	0	0.609	0.609
PIK3CG	CHRM1	4442215	4438226	9606.ENSP00000352121	9606.ENSP00000306490	0	0	0	0	0	0	0.6	0.064	0.609
STAT3	NAMPT	4435468	4433236	9606.ENSP00000264657	9606.ENSP00000222553	0	0	0	0	0.077	0	0	0.593	0.608
EDN1	PLG	4445200	4438461	9606.ENSP00000368683	9606.ENSP00000308938	0	0	0	0	0	0	0	0.608	0.608
AVP	FOS	4445364	4438204	9606.ENSP00000369647	9606.ENSP00000306245	0	0	0	0	0	0	0	0.608	0.608
GRIN2B	MAPK3	4451206	4435180	9606.ENSP00000477455	9606.ENSP00000263025	0	0	0	0	0.055	0.181	0	0.534	0.607
VDR	CYP3A4	4450226	4440831	9606.ENSP00000447173	9606.ENSP00000337915	0	0	0	0	0	0.085	0	0.588	0.607
BDNF	CALCA	4448727	4440295	9606.ENSP00000414303	9606.ENSP00000331746	0	0	0	0	0.082	0	0	0.589	0.606
SRC	TAC1	4444215	4439413	9606.ENSP00000362680	9606.ENSP00000321106	0	0	0	0	0	0	0	0.605	0.606
IL6ST	PIK3R3	4445526	4435132	9606.ENSP00000370698	9606.ENSP00000262741	0	0	0	0	0.054	0	0.6	0.043	0.606
AKT1	PTK2B	4450372	4446690	9606.ENSP00000451828	9606.ENSP00000380638	0	0	0	0.566	0.082	0.433	0	0.643	0.605
PTGS2	HSPA4	4442894	4437917	9606.ENSP00000356438	9606.ENSP00000302961	0	0	0	0	0	0.305	0	0.455	0.605
CASP8	STAT3	4442125	4435468	9606.ENSP00000351273	9606.ENSP00000264657	0	0	0	0	0.061	0	0	0.596	0.605
SHC1	SIRT1	4448165	4432849	9606.ENSP00000401303	9606.ENSP00000212015	0	0	0	0	0	0	0	0.605	0.605
AKT1	TAC1	4450372	4439413	9606.ENSP00000451828	9606.ENSP00000321106	0	0	0	0	0	0	0	0.604	0.605
SMARCA4	JUNB	4447900	4437951	9606.ENSP00000395654	9606.ENSP00000303315	0	0	0	0	0.049	0.522	0	0.2	0.604
ESR1	SREBF1	4448358	4441794	9606.ENSP00000405330	9606.ENSP00000348069	0	0	0	0	0	0.379	0	0.389	0.604
IL6ST	PIK3CD	4445526	4444876	9606.ENSP00000370698	9606.ENSP00000366563	0	0	0	0	0.052	0	0.6	0	0.604
ADRA2C	EDN1	4447303	4445200	9606.ENSP00000386069	9606.ENSP00000368683	0	0	0	0	0	0.157	0	0.55	0.604
EDN1	ADRB1	4445200	4443292	9606.ENSP00000368683	9606.ENSP00000358301	0	0	0	0	0	0.157	0	0.55	0.604
SHC1	TP53	4448165	4435880	9606.ENSP00000401303	9606.ENSP00000269305	0	0	0	0	0.061	0	0	0.596	0.604
CASP3	CD34	4438651	4438554	9606.ENSP00000311032	9606.ENSP00000310036	0	0	0	0	0	0	0	0.603	0.603
PIK3CA	MAPK3	4435346	4435180	9606.ENSP00000263967	9606.ENSP00000263025	0	0	0	0	0.061	0.157	0	0.539	0.603
PIK3CA	MAPK1	4435346	4432880	9606.ENSP00000263967	9606.ENSP00000215832	0	0	0	0	0.061	0.157	0	0.538	0.603
GHRL	CHRM1	4440636	4438226	9606.ENSP00000335074	9606.ENSP00000306490	0	0	0	0	0	0	0.6	0.05	0.603
BDNF	SRC	4448727	4444215	9606.ENSP00000414303	9606.ENSP00000362680	0	0	0	0	0	0.185	0	0.532	0.602
PTEN	MAPK14	4443848	4433482	9606.ENSP00000361021	9606.ENSP00000229795	0	0	0	0	0	0.261	0	0.482	0.601
AGTR1	IL1B	4449040	4435241	9606.ENSP00000419422	9606.ENSP00000263341	0	0	0	0	0.055	0	0	0.595	0.601
NDRG2	TP53	4450366	4435880	9606.ENSP00000451712	9606.ENSP00000269305	0	0	0	0	0	0	0	0.601	0.601
CAV1	IL1B	4440933	4435241	9606.ENSP00000339191	9606.ENSP00000263341	0	0	0	0	0.055	0	0	0.594	0.6
TLR3	STAT3	4437339	4435468	9606.ENSP00000296795	9606.ENSP00000264657	0	0	0	0	0	0.083	0	0.581	0.6
REN	MAPK3	4436004	4435180	9606.ENSP00000272190	9606.ENSP00000263025	0	0	0	0	0	0.05	0	0.596	0.6
TH	CASP3	4445511	4438651	9606.ENSP00000370571	9606.ENSP00000311032	0	0	0	0	0	0	0	0.599	0.599
AKT1	REN	4450372	4436004	9606.ENSP00000451828	9606.ENSP00000272190	0	0	0	0	0	0.085	0	0.58	0.599
ADRA2B	EDN1	4451505	4445200	9606.ENSP00000480573	9606.ENSP00000368683	0	0	0	0	0	0.157	0	0.543	0.598
SMAD3	POU5F1	4440414	4434735	9606.ENSP00000332973	9606.ENSP00000259915	0	0	0	0	0.049	0.323	0	0.426	0.598
PLG	VCAM1	4438461	4437090	9606.ENSP00000308938	9606.ENSP00000294728	0	0	0	0	0	0	0	0.598	0.598
ESR1	REN	4448358	4436004	9606.ENSP00000405330	9606.ENSP00000272190	0	0	0	0	0.061	0	0	0.589	0.598
JUN	ABCG2	4443699	4433689	9606.ENSP00000360266	9606.ENSP00000237612	0	0	0	0	0.051	0.123	0	0.555	0.597
HTR2A	CRH	4449830	4436231	9606.ENSP00000437737	9606.ENSP00000276571	0	0	0	0	0.084	0	0	0.578	0.597
SRC	ADRB2	4444215	4438121	9606.ENSP00000362680	9606.ENSP00000305372	0	0	0	0	0	0.399	0	0.358	0.597
GRIN1	CHRM1	4443769	4438226	9606.ENSP00000360608	9606.ENSP00000306490	0	0	0	0	0.533	0	0	0.173	0.597
CYP17A1	ESR2	4443418	4441379	9606.ENSP00000358903	9606.ENSP00000343925	0	0	0	0	0	0.085	0	0.578	0.597
TNF	ALOX5	4448041	4444382	9606.ENSP00000398698	9606.ENSP00000363512	0	0	0	0	0.121	0	0	0.56	0.597
HIF1A	RELA	4449842	4447098	9606.ENSP00000437955	9606.ENSP00000384273	0	0	0	0	0	0.379	0	0.378	0.597
TNF	PDGFA	4448041	4441629	9606.ENSP00000398698	9606.ENSP00000346508	0	0	0	0	0	0	0	0.597	0.597
TLR7	STAT3	4445433	4435468	9606.ENSP00000370034	9606.ENSP00000264657	0	0	0	0	0	0.083	0	0.577	0.596
TH	PRKACA	4445511	4438521	9606.ENSP00000370571	9606.ENSP00000309591	0	0	0	0	0.058	0.589	0	0	0.596
PTGS1	IL4	4442503	4433533	9606.ENSP00000354612	9606.ENSP00000231449	0	0	0	0	0.058	0	0	0.588	0.596
PPARG	MAPK3	4436745	4435180	9606.ENSP00000287820	9606.ENSP00000263025	0	0	0	0	0	0.073	0	0.583	0.596
AKT1	TLR3	4450372	4437339	9606.ENSP00000451828	9606.ENSP00000296795	0	0	0	0	0	0.123	0	0.559	0.596
TH	SIRT1	4445511	4432849	9606.ENSP00000370571	9606.ENSP00000212015	0	0	0	0	0	0	0	0.594	0.595
CSF2	MPO	4437349	4433305	9606.ENSP00000296871	9606.ENSP00000225275	0	0	0	0	0	0	0	0.595	0.595
BDNF	GRIA2	4448727	4437302	9606.ENSP00000414303	9606.ENSP00000296526	0	0	0	0	0.082	0	0	0.577	0.595
EDN1	CALCA	4445200	4440295	9606.ENSP00000368683	9606.ENSP00000331746	0	0	0	0	0	0	0	0.595	0.595
SREBF1	SP1	4441794	4440095	9606.ENSP00000348069	9606.ENSP00000329357	0	0	0	0	0	0.39	0	0.362	0.594
ABCB1	AKT1	4451279	4450372	9606.ENSP00000478255	9606.ENSP00000451828	0	0	0	0	0.061	0.057	0	0.579	0.594
VCAM1	ACE	4437090	4436887	9606.ENSP00000294728	9606.ENSP00000290866	0	0	0	0	0.062	0	0	0.585	0.594
ALOX15	IL1B	4450608	4435241	9606.ENSP00000458832	9606.ENSP00000263341	0	0	0	0	0.061	0	0	0.585	0.594
ALOX5	MAPK1	4444382	4432880	9606.ENSP00000363512	9606.ENSP00000215832	0	0	0	0	0	0	0	0.594	0.594
ACTB	CALM1	4441991	4441930	9606.ENSP00000349960	9606.ENSP00000349467	0	0	0	0	0.061	0.397	0	0.34	0.593
CDC42	PTK2B	4446990	4446690	9606.ENSP00000383118	9606.ENSP00000380638	0	0	0	0	0.064	0	0	0.583	0.593
BDNF	TGFB1	4448727	4433189	9606.ENSP00000414303	9606.ENSP00000221930	0	0	0	0	0	0	0	0.593	0.593
NOS3	SELP	4437409	4435297	9606.ENSP00000297494	9606.ENSP00000263686	0	0	0	0	0.055	0	0	0.587	0.593
GRIN1	HOMER1	4443769	4440558	9606.ENSP00000360608	9606.ENSP00000334382	0	0	0	0	0.057	0.305	0	0.429	0.593
VDR	SP1	4450226	4440095	9606.ENSP00000447173	9606.ENSP00000329357	0	0	0	0	0	0.111	0	0.561	0.593
STAT3	PIK3R3	4435468	4435132	9606.ENSP00000264657	9606.ENSP00000262741	0	0	0	0	0	0.513	0	0.197	0.592
ANXA1	IL1B	4444796	4435241	9606.ENSP00000366109	9606.ENSP00000263341	0	0	0	0	0.093	0	0	0.569	0.592
NR3C2	SCNN1B	4442077	4441549	9606.ENSP00000350815	9606.ENSP00000345751	0	0	0	0	0	0.05	0	0.588	0.592
ACE	PLAT	4436887	4433132	9606.ENSP00000290866	9606.ENSP00000220809	0	0	0	0	0.064	0	0	0.582	0.592
SCN5A	SMAD4	4448544	4441161	9606.ENSP00000410257	9606.ENSP00000341551	0	0	0	0	0	0	0	0.591	0.591
ESR1	COMT	4448358	4442480	9606.ENSP00000405330	9606.ENSP00000354511	0	0	0	0	0	0.088	0	0.57	0.591
PTGS2	ADAM17	4442894	4438549	9606.ENSP00000356438	9606.ENSP00000309968	0	0	0	0	0	0	0	0.591	0.591
POU5F1	MAPK1	4434735	4432880	9606.ENSP00000259915	9606.ENSP00000215832	0	0	0	0	0.048	0	0	0.586	0.59
EDN1	ADRA2A	4445200	4436361	9606.ENSP00000368683	9606.ENSP00000280155	0	0	0	0	0	0.157	0	0.534	0.59
HSPA1A	JUN	4444600	4443699	9606.ENSP00000364802	9606.ENSP00000360266	0	0	0	0	0.107	0.184	0	0.482	0.59
ADRA2B	TH	4451505	4445511	9606.ENSP00000480573	9606.ENSP00000370571	0	0	0	0	0	0	0	0.59	0.59
ACTB	CALM3	4441991	4436903	9606.ENSP00000349960	9606.ENSP00000291295	0	0	0	0	0.054	0.397	0	0.34	0.59
TNF	TAC1	4448041	4439413	9606.ENSP00000398698	9606.ENSP00000321106	0	0	0	0	0	0	0	0.589	0.589
IL1B	SERPINE1	4435241	4433266	9606.ENSP00000263341	9606.ENSP00000223095	0	0	0	0	0.063	0	0	0.58	0.589
FABP3	PPARG	4444252	4436745	9606.ENSP00000362817	9606.ENSP00000287820	0	0	0	0	0	0.064	0	0.579	0.589
CYP2B6	NQO1	4439703	4439310	9606.ENSP00000324648	9606.ENSP00000319788	0	0	0	0	0	0	0	0.589	0.589
TH	ADRB1	4445511	4443292	9606.ENSP00000370571	9606.ENSP00000358301	0	0	0	0	0	0	0	0.589	0.589
AGTR1	MAPK1	4449040	4432880	9606.ENSP00000419422	9606.ENSP00000215832	0	0	0	0	0	0.313	0	0.426	0.588
ADAM17	F2	4438549	4438421	9606.ENSP00000309968	9606.ENSP00000308541	0	0	0	0	0	0	0	0.588	0.588
HMGB1	HSPA4	4441512	4437917	9606.ENSP00000345347	9606.ENSP00000302961	0	0	0	0	0.094	0.054	0	0.558	0.588
GHRL	CRP	4440636	4434405	9606.ENSP00000335074	9606.ENSP00000255030	0	0	0	0	0	0	0	0.588	0.588
ALOX5AP	PDE4D	4451430	4441530	9606.ENSP00000479870	9606.ENSP00000345502	0	0	0	0	0	0	0	0.588	0.588
PPARG	MAPK14	4436745	4433482	9606.ENSP00000287820	9606.ENSP00000229795	0	0	0	0	0	0.073	0	0.573	0.588
PPARG	ABCG2	4436745	4433689	9606.ENSP00000287820	9606.ENSP00000237612	0	0	0	0	0	0.076	0	0.572	0.588
ESR1	AR	4448358	4444436	9606.ENSP00000405330	9606.ENSP00000363822	0	0	0	0.656	0.062	0.379	0	0.936	0.587
HMGB1	MPO	4441512	4433305	9606.ENSP00000345347	9606.ENSP00000225275	0	0	0	0	0	0	0	0.587	0.587
PTEN	CASP8	4443848	4442125	9606.ENSP00000361021	9606.ENSP00000351273	0	0	0	0	0	0.114	0	0.553	0.587
HSPB2	ATM	4437856	4436300	9606.ENSP00000302476	9606.ENSP00000278616	0	0	0	0	0	0	0	0.587	0.587
ADAM17	IL1B	4438549	4435241	9606.ENSP00000309968	9606.ENSP00000263341	0	0	0	0	0.057	0	0	0.58	0.587
AGTR1	SIRT1	4449040	4432849	9606.ENSP00000419422	9606.ENSP00000212015	0	0	0	0	0	0	0	0.587	0.587
XBP1	SIRT1	4432900	4432849	9606.ENSP00000216037	9606.ENSP00000212015	0	0	0	0	0	0	0	0.587	0.587
OPRM1	IL4	4447859	4433533	9606.ENSP00000394624	9606.ENSP00000231449	0	0	0	0	0	0	0	0.586	0.586
TH	ADRB2	4445511	4438121	9606.ENSP00000370571	9606.ENSP00000305372	0	0	0	0	0	0	0	0.586	0.586
CAV1	SERPINE1	4440933	4433266	9606.ENSP00000339191	9606.ENSP00000223095	0	0	0	0	0.314	0	0	0.422	0.586
KMT2A	SIRT1	4449798	4432849	9606.ENSP00000436786	9606.ENSP00000212015	0	0	0	0	0	0.472	0	0.247	0.586
DBH	ADRA1A	4446100	4445417	9606.ENSP00000376776	9606.ENSP00000369960	0	0	0	0	0	0	0	0.585	0.585
SMARCA4	STAT3	4447900	4435468	9606.ENSP00000395654	9606.ENSP00000264657	0	0	0	0	0.064	0.321	0	0.4	0.585
VKORC1	CYP3A4	4446359	4440831	9606.ENSP00000378426	9606.ENSP00000337915	0	0	0	0	0	0	0	0.585	0.585
COMT	ADRA2A	4442480	4436361	9606.ENSP00000354511	9606.ENSP00000280155	0	0	0	0	0	0	0	0.585	0.585
NPPA	AGT	4444735	4442719	9606.ENSP00000365663	9606.ENSP00000355627	0	0	0	0	0	0	0	0.585	0.585
CASP3	FOS	4438651	4438204	9606.ENSP00000311032	9606.ENSP00000306245	0	0	0	0	0	0	0	0.585	0.585
AGTR1	MAPK3	4449040	4435180	9606.ENSP00000419422	9606.ENSP00000263025	0	0	0	0	0	0	0	0.584	0.584
HMGB1	PLG	4441512	4438461	9606.ENSP00000345347	9606.ENSP00000308938	0	0	0	0	0	0.379	0	0.358	0.584
F2	ACE	4438421	4436887	9606.ENSP00000308541	9606.ENSP00000290866	0	0	0	0	0.055	0	0	0.578	0.584
COL5A1	TGFB1	4443819	4433189	9606.ENSP00000360882	9606.ENSP00000221930	0	0	0	0	0.065	0.418	0	0.297	0.584
CRP	PLAT	4434405	4433132	9606.ENSP00000255030	9606.ENSP00000220809	0	0	0	0	0	0	0	0.584	0.584
ABCB1	TNF	4451279	4448041	9606.ENSP00000478255	9606.ENSP00000398698	0	0	0	0	0	0	0	0.583	0.583
ADRA2A	SLC6A4	4436361	4434929	9606.ENSP00000280155	9606.ENSP00000261707	0	0	0	0	0	0.073	0	0.569	0.583
SRC	PTGER2	4444215	4433932	9606.ENSP00000362680	9606.ENSP00000245457	0	0	0	0	0	0.357	0	0.378	0.583
ESR1	NFKB1	4448358	4433374	9606.ENSP00000405330	9606.ENSP00000226574	0	0	0	0	0	0.379	0	0.357	0.583
CASP3	IGF1R	4438651	4435797	9606.ENSP00000311032	9606.ENSP00000268035	0	0	0	0	0	0.064	0	0.572	0.583
EDN1	SELP	4445200	4435297	9606.ENSP00000368683	9606.ENSP00000263686	0	0	0	0	0	0	0	0.583	0.583
SCN5A	PIK3CD	4448544	4444876	9606.ENSP00000410257	9606.ENSP00000366563	0	0	0	0	0.078	0	0	0.566	0.582
OPRM1	TH	4447859	4445511	9606.ENSP00000394624	9606.ENSP00000370571	0	0	0	0	0	0	0	0.582	0.582
NOS1	JUN	4451263	4443699	9606.ENSP00000477999	9606.ENSP00000360266	0	0	0	0	0	0	0	0.581	0.582
GHRL	NAMPT	4440636	4433236	9606.ENSP00000335074	9606.ENSP00000222553	0	0	0	0	0	0	0	0.582	0.582
ACTB	MAPK1	4441991	4432880	9606.ENSP00000349960	9606.ENSP00000215832	0	0	0	0	0.049	0.128	0	0.537	0.582
PTEN	SMAD3	4443848	4440414	9606.ENSP00000361021	9606.ENSP00000332973	0	0	0	0	0.061	0	0	0.574	0.582
TNF	F2	4448041	4438421	9606.ENSP00000398698	9606.ENSP00000308541	0	0	0	0	0	0	0	0.581	0.581
SRC	PTGS2	4444215	4442894	9606.ENSP00000362680	9606.ENSP00000356438	0	0	0	0	0.061	0.058	0	0.565	0.581
TNF	PLA2G1B	4448041	4438770	9606.ENSP00000398698	9606.ENSP00000312286	0	0	0	0	0	0	0	0.581	0.581
ALOX5	MPO	4444382	4433305	9606.ENSP00000363512	9606.ENSP00000225275	0	0	0	0	0.12	0	0	0.543	0.581
AR	HSPA4	4444436	4437917	9606.ENSP00000363822	9606.ENSP00000302961	0	0	0	0	0	0.109	0	0.549	0.58
ADIPOQ	NOS2	4447630	4439909	9606.ENSP00000389814	9606.ENSP00000327251	0	0	0	0	0	0	0	0.58	0.58
JUN	XBP1	4443699	4432900	9606.ENSP00000360266	9606.ENSP00000216037	0	0	0	0	0.061	0	0	0.571	0.58
CD34	NOS3	4438554	4437409	9606.ENSP00000310036	9606.ENSP00000297494	0	0	0	0	0.061	0	0	0.572	0.58
AKT1	TLR7	4450372	4445433	9606.ENSP00000451828	9606.ENSP00000370034	0	0	0	0	0	0.123	0	0.541	0.58
ACTB	IL1B	4441991	4435241	9606.ENSP00000349960	9606.ENSP00000263341	0	0	0	0	0	0	0	0.579	0.579
AGT	ROCK2	4442719	4439164	9606.ENSP00000355627	9606.ENSP00000317985	0	0	0	0	0	0	0	0.579	0.579
CALCA	CRP	4440295	4434405	9606.ENSP00000331746	9606.ENSP00000255030	0	0	0	0	0	0	0	0.579	0.579
USF1	SERPINE1	4443013	4433266	9606.ENSP00000357000	9606.ENSP00000223095	0	0	0	0	0	0	0	0.579	0.579
ESR1	SGK1	4448358	4442972	9606.ENSP00000405330	9606.ENSP00000356832	0	0	0	0	0	0.081	0	0.56	0.579
ESR2	STAT3	4441379	4435468	9606.ENSP00000343925	9606.ENSP00000264657	0	0	0	0	0	0.053	0	0.572	0.578
IL10	SERPINE1	4448642	4433266	9606.ENSP00000412237	9606.ENSP00000223095	0	0	0	0	0	0	0	0.578	0.578
CASP3	PPARG	4438651	4436745	9606.ENSP00000311032	9606.ENSP00000287820	0	0	0	0	0	0.058	0	0.571	0.578
RB1	STAT3	4435747	4435468	9606.ENSP00000267163	9606.ENSP00000264657	0	0	0	0	0	0.379	0	0.349	0.578
HOMER1	GRIA2	4440558	4437302	9606.ENSP00000334382	9606.ENSP00000296526	0	0	0	0	0.061	0.078	0	0.551	0.577
FOS	RB1	4438204	4435747	9606.ENSP00000306245	9606.ENSP00000267163	0	0	0	0	0	0.379	0	0.348	0.577
GRIN2B	HTR2A	4451206	4449830	9606.ENSP00000477455	9606.ENSP00000437737	0	0	0	0	0.136	0.064	0	0.519	0.577
SMAD4	CAV1	4441161	4440933	9606.ENSP00000341551	9606.ENSP00000339191	0	0	0	0	0	0.379	0	0.348	0.577
RELA	KAT5	4447098	4441035	9606.ENSP00000384273	9606.ENSP00000340330	0	0	0	0	0.08	0.379	0	0.318	0.576
VDR	SRC	4450226	4444215	9606.ENSP00000447173	9606.ENSP00000362680	0	0	0	0	0	0.407	0	0.315	0.576
EPHX2	SHMT1	4449539	4439233	9606.ENSP00000430269	9606.ENSP00000318868	0.277	0	0	0	0.05	0	0	0.432	0.576
DBH	FOS	4446100	4438204	9606.ENSP00000376776	9606.ENSP00000306245	0	0	0	0	0	0	0	0.576	0.576
HMGB1	CASP3	4441512	4438651	9606.ENSP00000345347	9606.ENSP00000311032	0	0	0	0	0	0	0	0.576	0.576
VCAM1	MAPK3	4437090	4435180	9606.ENSP00000294728	9606.ENSP00000263025	0	0	0	0	0	0	0	0.575	0.575
AVP	CRP	4445364	4434405	9606.ENSP00000369647	9606.ENSP00000255030	0	0	0	0	0	0	0	0.575	0.575
AKT1	HSPA1A	4450372	4444600	9606.ENSP00000451828	9606.ENSP00000364802	0	0	0	0	0	0.1	0	0.548	0.575
TLR8	STAT3	4438750	4435468	9606.ENSP00000312082	9606.ENSP00000264657	0	0	0	0	0	0.083	0	0.556	0.575
SP1	ADAM17	4440095	4438549	9606.ENSP00000329357	9606.ENSP00000309968	0	0	0	0	0	0	0	0.574	0.574
HSPA4	SIRT1	4437917	4432849	9606.ENSP00000302961	9606.ENSP00000212015	0	0	0	0	0.061	0.091	0	0.541	0.574
ABCB1	COMT	4451279	4442480	9606.ENSP00000478255	9606.ENSP00000354511	0.049	0	0	0	0	0	0	0.57	0.574
RELA	TLR3	4447098	4437339	9606.ENSP00000384273	9606.ENSP00000296795	0	0	0	0	0	0.082	0	0.556	0.574
CD34	ABCG2	4438554	4433689	9606.ENSP00000310036	9606.ENSP00000237612	0	0	0	0	0	0	0	0.574	0.574
SMAD4	ATM	4441161	4436300	9606.ENSP00000341551	9606.ENSP00000278616	0	0	0	0	0.078	0	0	0.555	0.573
ADRA2C	ACE	4447303	4436887	9606.ENSP00000386069	9606.ENSP00000290866	0	0	0	0	0.061	0	0	0.564	0.573
PTGS1	PTGER2	4442503	4433932	9606.ENSP00000354612	9606.ENSP00000245457	0	0	0	0	0.111	0.056	0	0.533	0.573
IL10	ACTB	4448642	4441991	9606.ENSP00000412237	9606.ENSP00000349960	0	0	0	0	0	0	0	0.573	0.573
USF1	FOS	4443013	4438204	9606.ENSP00000357000	9606.ENSP00000306245	0	0	0	0	0	0.265	0	0.443	0.573
GOT1	F2	4443556	4438421	9606.ENSP00000359539	9606.ENSP00000308541	0	0	0	0	0	0	0	0.573	0.573
PIK3CG	IGF1R	4442215	4435797	9606.ENSP00000352121	9606.ENSP00000268035	0	0	0	0	0.062	0.124	0	0.522	0.573
PTEN	RB1	4443848	4435747	9606.ENSP00000361021	9606.ENSP00000267163	0	0	0	0	0.064	0	0	0.562	0.573
TNF	SIRT1	4448041	4432849	9606.ENSP00000398698	9606.ENSP00000212015	0	0	0	0	0	0	0	0.572	0.572
ACTB	STAT3	4441991	4435468	9606.ENSP00000349960	9606.ENSP00000264657	0	0	0	0	0	0	0	0.572	0.572
SMAD4	STAT3	4441161	4435468	9606.ENSP00000341551	9606.ENSP00000264657	0	0	0	0	0.061	0	0	0.563	0.572
AGT	PPARG	4442719	4436745	9606.ENSP00000355627	9606.ENSP00000287820	0	0	0	0	0.057	0.051	0	0.56	0.572
PARK7	STUB1	4448989	4433095	9606.ENSP00000418770	9606.ENSP00000219548	0	0	0	0	0.078	0.379	0	0.312	0.571
AVP	NPPA	4445364	4444735	9606.ENSP00000369647	9606.ENSP00000365663	0	0	0	0	0	0	0	0.571	0.571
CAV1	ACE	4440933	4436887	9606.ENSP00000339191	9606.ENSP00000290866	0	0	0	0	0.049	0	0	0.567	0.571
GC	PLG	4449184	4438461	9606.ENSP00000421725	9606.ENSP00000308938	0	0	0	0	0.368	0	0	0.35	0.571
CDC42	CAV1	4446990	4440933	9606.ENSP00000383118	9606.ENSP00000339191	0	0	0	0	0.061	0.127	0	0.519	0.571
AGTR1	SERPINE1	4449040	4433266	9606.ENSP00000419422	9606.ENSP00000223095	0	0	0	0	0.064	0.051	0	0.556	0.571
CACNA1B	PDE4D	4443731	4441530	9606.ENSP00000360423	9606.ENSP00000345502	0	0	0	0	0.077	0	0.54	0.071	0.571
CTNNB1	SERPINE1	4441426	4433266	9606.ENSP00000344456	9606.ENSP00000223095	0	0	0	0	0	0	0	0.571	0.571
NOS1	TH	4451263	4445511	9606.ENSP00000477999	9606.ENSP00000370571	0	0	0	0	0.061	0	0	0.561	0.57
JUN	TLR3	4443699	4437339	9606.ENSP00000360266	9606.ENSP00000296795	0	0	0	0	0	0	0	0.57	0.57
CALM1	MAPK14	4441930	4433482	9606.ENSP00000349467	9606.ENSP00000229795	0	0	0	0	0.061	0.41	0	0.287	0.57
CTNNB1	NOS3	4441426	4437409	9606.ENSP00000344456	9606.ENSP00000297494	0	0	0	0	0.064	0.379	0	0.321	0.57
ABCB1	PTEN	4451279	4443848	9606.ENSP00000478255	9606.ENSP00000361021	0	0	0	0	0.061	0.074	0	0.545	0.57
CX3CR1	IL4	4442101	4433533	9606.ENSP00000351059	9606.ENSP00000231449	0	0	0	0	0	0	0	0.57	0.57
ABCG1	CSF2	4442587	4437349	9606.ENSP00000354995	9606.ENSP00000296871	0	0	0	0	0	0	0	0.569	0.569
VDR	TP53	4450226	4435880	9606.ENSP00000447173	9606.ENSP00000269305	0	0	0	0	0	0.255	0	0.446	0.569
ADAM17	ACE	4438549	4436887	9606.ENSP00000309968	9606.ENSP00000290866	0	0	0	0	0	0	0	0.569	0.569
TLR3	MAPK1	4437339	4432880	9606.ENSP00000296795	9606.ENSP00000215832	0	0	0	0	0	0.05	0	0.565	0.569
ATM	MAPK3	4436300	4435180	9606.ENSP00000278616	9606.ENSP00000263025	0	0	0	0	0	0.064	0	0.558	0.568
ACTB	NOS2	4441991	4439909	9606.ENSP00000349960	9606.ENSP00000327251	0	0	0	0	0.063	0.386	0	0.309	0.568
BDNF	GRIN3A	4448727	4442616	9606.ENSP00000414303	9606.ENSP00000355155	0	0	0	0	0.061	0	0	0.559	0.568
AKT1	TLR8	4450372	4438750	9606.ENSP00000451828	9606.ENSP00000312082	0	0	0	0	0	0.123	0	0.528	0.568
ABCB1	OPRM1	4451279	4447859	9606.ENSP00000478255	9606.ENSP00000394624	0	0	0	0	0	0	0	0.567	0.567
CYP3A4	NR3C1	4440831	4433539	9606.ENSP00000337915	9606.ENSP00000231509	0	0	0	0	0	0.085	0	0.546	0.567
AKT1	MPO	4450372	4433305	9606.ENSP00000451828	9606.ENSP00000225275	0	0	0	0	0	0.058	0	0.559	0.567
SREBF1	MAPK1	4441794	4432880	9606.ENSP00000348069	9606.ENSP00000215832	0	0	0	0	0.055	0.393	0	0.306	0.567
TNF	GHRL	4448041	4440636	9606.ENSP00000398698	9606.ENSP00000335074	0	0	0	0	0.065	0	0	0.556	0.567
MAPK3	SERPINE1	4435180	4433266	9606.ENSP00000263025	9606.ENSP00000223095	0	0	0	0	0	0	0	0.567	0.567
NQO1	CASP3	4439310	4438651	9606.ENSP00000319788	9606.ENSP00000311032	0	0	0	0	0	0	0	0.566	0.566
DRD2	CRH	4442557	4436231	9606.ENSP00000354859	9606.ENSP00000276571	0	0	0	0	0.061	0	0	0.556	0.566
JUN	HSPB2	4443699	4437856	9606.ENSP00000360266	9606.ENSP00000302476	0	0	0	0	0.05	0	0	0.562	0.566
FGF1	AKT1	4451524	4450372	9606.ENSP00000480791	9606.ENSP00000451828	0	0	0	0	0	0.05	0	0.562	0.566
HSPA4	MAPK1	4437917	4432880	9606.ENSP00000302961	9606.ENSP00000215832	0	0	0	0	0	0.185	0	0.489	0.566
NOS1	REN	4451263	4436004	9606.ENSP00000477999	9606.ENSP00000272190	0	0	0	0	0.061	0	0	0.556	0.566
GRIN2B	FOS	4451206	4438204	9606.ENSP00000477455	9606.ENSP00000306245	0	0	0	0	0	0	0	0.566	0.566
[truncated: 1,329 more rows]
