# Supplementary material for: A Network Pharmacology Approach to Investigate the Active Compounds and Mechanisms of Musk for Ischemic Stroke
Source: Evid Based Complement Alternat Med. 2020 Jul 3;2020:4063180. doi: 10.1155/2020/4063180 (PMC7354650; doi:10.1155/2020/4063180)
Supplement: Supplementary Materials — The detailed information of chemical composition and predicted target of musk (S1), ischemic stroke target (S2), string data (S3), compound target analysis data (S4), Gene Ontology enrichment analysis results (S5, S6, and S7), and KEGG enrichment analysis results (S8 and S9) used to support the findings of this study is included within the supplementary information files. [file 4063180.f1.zip › 4063180.f1/S4.Core PPI Network Analysis.xls]

## Sheet: Sheet1
name	BetweennessCentrality	ClosenessCentrality	Degree
AKT1	0.0510019	0.689655	123
MAPK3	0.0445178	0.679012	118
TP53	0.0473374	0.641399	103
JUND	0.000345	0.487805	21
P4HB	0.00191487	0.45738	17
CALR	0.000782	0.482456	22
TNF	0.032395	0.637681	102
PLAT	0.00109292	0.489978	21
MAPK1	0.0308877	0.634006	96
SRC	0.0319828	0.630372	94
MT-CO2	0.0012751	0.453608	13
MT-CO1	0.000783	0.394265	6
JUNB	2.88e-05	0.466102	15
FOS	0.0308415	0.625	92
CASP3	0.0148313	0.609418	88
JUN	0.0135188	0.604396	83
NOS3	0.0264569	0.609418	82
IL1B	0.0197625	0.596206	82
STAT3	0.0113555	0.594595	82
RIPK1	0.000159	0.462185	17
ESR1	0.0199763	0.606061	82
PAK1	0.000115	0.478261	15
PTGS2	0.0130122	0.589812	76
IL10	0.0116959	0.585106	75
ITGB3	0.00197788	0.488889	25
SHC1	0.00167139	0.515222	36
MAPK14	0.0119041	0.586667	73
CACNA1C	0.0107589	0.470085	26
EDN1	0.0124612	0.580475	73
BDNF	0.021188	0.585106	72
PPARG	0.0218354	0.572917	67
ALOX5AP	0.000555	0.428016	12
ALOX5	0.000481	0.483516	21
PIK3CB	0.000202	0.463158	18
SIRT1	0.011318	0.572917	66
RELA	0.015626	0.571429	66
AGT	0.0199727	0.572917	65
KAT5	0.00264243	0.452675	18
CTNNB1	0.0132314	0.569948	63
AR	0.012515	0.571429	63
ACTB	0.00967289	0.571429	63
BCL2	0.000328	0.45929	14
PTEN	0.00677477	0.56266	61
NR3C1	0.010797	0.56701	61
IL4	0.00898827	0.558376	60
PIK3CA	0.00896625	0.558376	58
CRP	0.01199	0.555556	57
PROC	0.000844	0.42065	10
REN	0.0146468	0.555556	56
SERPINF2	0.000422	0.407407	10
SMAD3	0.0109534	0.555556	54
CAV1	0.0139039	0.554156	54
HIF1A	0.00364663	0.548628	54
TAC1	0.0103791	0.544554	54
HSPA4	0.0127518	0.554156	53
ACE	0.00784608	0.545906	52
VCAM1	0.00553308	0.544554	51
TGFB1	0.00634345	0.547264	51
BAZ1B	0.000119	0.406654	7
F2	0.0163353	0.545906	50
TLR3	0.000422	0.506912	33
AGTR2	0.00319514	0.489978	27
SP1	0.00481586	0.540541	50
SERPINE1	0.00743955	0.539216	49
MPO	0.00606913	0.539216	48
CSF2	0.00488381	0.539216	47
AGTR1	0.00561089	0.53528	46
NFKB1	0.00297839	0.536585	46
IGF1R	0.00298733	0.537897	46
GRIN1	0.00332391	0.488889	27
TH	0.0112888	0.532688	44
ANXA1	0.00730446	0.537897	44
CASP8	0.00357355	0.520095	43
PLG	0.00567596	0.531401	43
NOS2	0.00452754	0.531401	43
CEBPB	0.0013923	0.515222	36
PIK3CD	0.00124752	0.474138	20
AVP	0.00770369	0.516432	42
STUB1	0.000569	0.498866	25
IL6ST	0.000588	0.464135	16
PARP1	0.00519388	0.526316	42
CD34	0.00396541	0.526316	42
RB1	0.000725	0.496614	28
SMAD4	0.00374559	0.527578	41
NR1H3	0.000336	0.440882	12
ABCA1	0.0017143	0.491071	23
CDC42	0.00478017	0.520095	39
ADIPOQ	0.00194308	0.520095	39
PTGS1	0.00314146	0.478261	25
PTGIS	2.59e-06	0.423077	6
OPRM1	0.00498851	0.521327	39
NOS1	0.00487037	0.522565	38
ADAM17	0.000577	0.5	24
CALM2	0.00428504	0.466102	19
PIK3CG	0.000486	0.473118	19
HSPA1A	0.00127662	0.517647	33
CALM1	0.016744	0.517647	37
SCNN1A	0.000868	0.411985	11
HSPB2	0.000558	0.49217	24
CRH	0.00400085	0.516432	37
ROCK2	0.000125	0.469083	14
ESR2	0.00311993	0.52381	37
SCNN1G	0.000543	0.443548	10
ALOX15	0.000514	0.45082	15
PTK2B	0.00128889	0.494382	21
GRIN3A	0.000103	0.449898	10
PDE1A	0.00165192	0.413534	8
PDE1C	0.000182	0.354839	6
TGFB2	0.00123106	0.470085	19
POU5F1	0.000611	0.494382	29
CALCA	0.00434528	0.515222	37
HMGB1	0.00131381	0.522565	40
ADRB2	0.00612855	0.526316	37
PDE1B	0.000182	0.354839	6
DBH	0.00125463	0.454545	20
COMT	0.00443533	0.486726	29
SREBF1	0.00700878	0.511628	36
DRD2	0.00659158	0.508083	36
GRIN2B	0.00710881	0.508083	35
FADS1	0.000212	0.402194	7
SCNN1B	0.000533	0.387324	8
GRIA2	0.00352602	0.47619	21
ADRA1A	0.00154927	0.5	29
ATM	0.00867738	0.509259	34
SMARCA4	0.00185957	0.501139	34
LTA	7.63e-05	0.43222	11
PC	0	0.338983	3
GOT1	0.00437538	0.419847	9
SCN5A	0.00650125	0.433925	19
PPARA	0.00728043	0.512821	34
TLR7	0.000465	0.510441	34
TLR8	0.000852	0.509259	34
USF1	8.7e-05	0.458333	13
HRH1	0.000248	0.447154	16
NGFR	0.00318143	0.515222	33
FGF1	0.000414	0.489978	21
PTGER1	0.000414	0.455487	20
PIK3R3	0.00229317	0.5	32
CYP3A4	0.00253599	0.489978	23
CYP2B6	0.00317724	0.487805	23
HTR2B	0.000525	0.461216	19
CYP2R1	0.000269	0.354839	4
CYP24A1	0.00109779	0.428016	7
PRKCD	0.00224589	0.506912	32
PRKACA	0.0167432	0.516432	32
VDR	0.00899261	0.509259	31
PSMB9	0.000106	0.441767	11
ADRA2A	0.00413622	0.497738	31
ADRA2C	0.0010483	0.491071	28
HTR2A	0.0029267	0.504587	30
ADRA2B	0.000972	0.487805	27
G6PD	0.0128973	0.484581	20
PLA2G1B	0.00205772	0.493274	24
C5	0.000608	0.443548	16
VKORC1	0.000213	0.40293	7
SHH	0.00182257	0.5	30
CHRM1	0.00520706	0.496614	29
KCNN4	0.000435	0.409683	8
CRYZ	0.00015	0.470085	12
SGK1	0.00515704	0.504587	27
ADRB1	0.0027492	0.497738	27
REST	0.000231	0.456432	11
CYP17A1	9.17e-05	0.442656	9
COL5A1	6.71e-05	0.392857	6
EPHX2	0.00192945	0.430528	6
CCNH	0	0.413534	5
PTGER2	0.000665	0.442656	12
P2RY1	0.00194562	0.49217	27
NQO1	0.0083525	0.501139	27
CX3CR1	0.00210815	0.493274	27
PDGFA	0.000297	0.448065	13
COX8A	0.000145	0.387324	4
ADORA1	0.00152221	0.497738	27
HRH3	0.000142	0.426357	14
ADAM10	0.000469	0.469083	13
PARK7	0.00357864	0.486726	21
HRH2	2.13e-05	0.378007	8
ADORA2B	0.00125262	0.478261	18
APRT	0.00279181	0.364842	9
ADA	0.00289846	0.461216	13
CALM3	0.00790644	0.494382	26
SLC6A4	0.00136164	0.491071	25
ABCB1	0.00376982	0.493274	25
AOC3	9.53e-05	0.397112	5
PAWR	3.66e-05	0.437376	6
GC	0.0018841	0.417457	11
PDE11A	9.89e-05	0.348101	2
SPIDR	0	0.341085	2
PDE4D	0.00259445	0.448065	11
SLC8A1	0.00160617	0.383944	9
SELP	0.0016809	0.498866	31
NAMPT	7.37e-05	0.479303	16
ADORA2A	0.00068	0.493274	19
ATP1A2	0.000678	0.434783	8
CACNA1A	0.00068	0.419048	12
KCNE2	0	0.329341	2
ATP13A2	0	0.360656	3
XBP1	0.00026	0.474138	18
F12	4.98e-05	0.383275	6
GHRL	0.00168903	0.506912	28
SCN1A	0.000811	0.387324	10
NEFH	3.17e-05	0.434783	7
CACNA1B	0.00062	0.428016	13
MTAP	0.00048	0.408922	4
HDAC9	2.69e-05	0.440882	9
ABCG1	0.000178	0.440882	10
NR3C2	0.00297283	0.496614	25
FNDC5	7.69e-06	0.435644	7
BMP6	7.55e-06	0.436508	7
UCHL1	0.00182178	0.470085	14
ABCG2	0.000218	0.480349	19
FADS2	9.51e-05	0.387324	6
NPPA	0.00137515	0.471092	14
GRIK2	0.000465	0.434783	10
HOMER1	0	0.415094	6
NDRG2	9.01e-06	0.415879	5
FABP3	7.54e-05	0.405157	6
KMT2A	4.13e-06	0.418251	5
SHMT1	0.000583	0.348101	5
S100A9	0.000211	0.44	10
LONP1	7.02e-05	0.362438	2
