# Supplementary material for: A Network Pharmacology Approach to Investigate the Active Compounds and Mechanisms of Musk for Ischemic Stroke
Source: Evid Based Complement Alternat Med. 2020 Jul 3;2020:4063180. doi: 10.1155/2020/4063180 (PMC7354650; doi:10.1155/2020/4063180)
Supplement: Supplementary Materials — The detailed information of chemical composition and predicted target of musk (S1), ischemic stroke target (S2), string data (S3), compound target analysis data (S4), Gene Ontology enrichment analysis results (S5, S6, and S7), and KEGG enrichment analysis results (S8 and S9) used to support the findings of this study is included within the supplementary information files. [file 4063180.f1.zip › 4063180.f1/S5.DAVID Core Gene GO BP.xls]

## Sheet: Sheet1
Category	Term	Count	%	PValue	Genes	List Total	Pop Hits	Pop Total	Fold Enrichment	Bonferroni	Benjamini	FDR
GOTERM_BP_DIRECT	GO:0045944~positive regulation of transcription from RNA polymerase II promoter	36	40.9091	4.64766e-21	PPARA, TNF, DRD2, EDN1, PPARG, NFKB1, NR3C1, IL10, TGFB1, SHH, CTNNB1, AKT1, FOS, VDR, P2RY1, SERPINE1, IL1B, SREBF1, IL4, AR, NOS1, RELA, TP53, SMAD4, ESR1, SMAD3, SIRT1, STAT3, ADRB2, HIF1A, SP1, JUN, MAPK14, MAPK3, PARP1, SMARCA4	88	981	16792	7.0025	1.02202e-17	1.02202e-17	8.07932e-18
GOTERM_BP_DIRECT	GO:0045893~positive regulation of transcription, DNA-templated	28	31.8182	2.78253e-20	PPARA, TNF, PPARG, NFKB1, IL10, SHH, TGFB1, SRC, CTNNB1, FOS, AGT, IL1B, IL4, AR, NOS1, RELA, TP53, ESR1, SMAD4, SMAD3, ESR2, STAT3, MAPK1, HIF1A, SP1, JUN, MAPK3, SMARCA4	88	515	16792	10.3746	6.11877e-17	3.05939e-17	4.83703e-17
GOTERM_BP_DIRECT	GO:0007568~aging	16	18.1818	5.74913e-15	SREBF1, RELA, PTEN, IL10, STAT3, TGFB1, AKT1, VCAM1, CALCA, FOS, AGT, JUN, P2RY1, MPO, NQO1, HTR2A	88	165	16792	18.5036	1.26952e-11	4.23173e-12	1.00364e-11
GOTERM_BP_DIRECT	GO:0042493~response to drug	19	21.5909	1.64419e-14	SREBF1, IL4, PTGS2, DRD2, RELA, PPARG, ANXA1, ABCB1, PTEN, IL10, STAT3, SRC, TGFB1, CTNNB1, FOS, CASP3, JUN, CRH, HTR2A	88	304	16792	11.9261	3.61324e-11	9.03311e-12	2.8566e-11
GOTERM_BP_DIRECT	GO:1902895~positive regulation of pri-miRNA transcription from RNA polymerase II promoter	9	10.2273	4.47715e-14	FOS, HIF1A, RELA, JUN, SMAD3, NGFR, TGFB1, STAT3, SMARCA4	88	20	16792	85.8682	9.83876e-11	1.96775e-11	7.77822e-11
GOTERM_BP_DIRECT	GO:0010628~positive regulation of gene expression	17	19.3182	3.43722e-13	CSF2, AR, AVP, CAV1, TNF, CRP, TP53, SMAD3, STAT3, TGFB1, CDC42, VDR, HIF1A, CD34, MAPK14, CRH, IL1B	88	262	16792	12.3813	7.55851e-10	1.25975e-10	5.97522e-10
GOTERM_BP_DIRECT	GO:0008217~regulation of blood pressure	11	12.5	1.16152e-12	CALCA, SGK1, ACE, PTGS2, CD34, REN, AGT, EDN1, PPARG, TAC1, NOS3	88	65	16792	32.2923	2.55417e-09	3.64882e-10	2.01913e-09
GOTERM_BP_DIRECT	GO:0001666~response to hypoxia	14	15.9091	4.58686e-12	VCAM1, PPARA, CASP3, CAV1, HIF1A, NOS1, DRD2, TH, SMAD4, SMAD3, NOS2, ADIPOQ, TGFB1, ATM	88	172	16792	15.5317	1.00866e-08	1.26082e-09	7.97367e-09
GOTERM_BP_DIRECT	GO:0051091~positive regulation of sequence-specific DNA binding transcription factor activity	12	13.6364	6.31122e-12	IL4, AKT1, TNF, EDN1, PPARG, ESR1, IL1B, ESR2, PTEN, IL10, CTNNB1, SMARCA4	88	105	16792	21.8078	1.38783e-08	1.54203e-09	1.09711e-08
GOTERM_BP_DIRECT	GO:0043066~negative regulation of apoptotic process	19	21.5909	1.52801e-11	IL4, AVP, RELA, ANXA1, TP53, SMAD3, NFKB1, SIRT1, PTEN, IL10, SHH, STAT3, SRC, AKT1, IGF1R, CASP3, MPO, NGFR, NQO1	88	455	16792	7.96823	3.3601e-08	3.3601e-09	2.65624e-08
GOTERM_BP_DIRECT	GO:0032355~response to estradiol	11	12.5	3.7402e-11	CASP3, PTGS2, CASP8, TH, ANXA1, ESR1, NQO1, PTEN, TGFB1, STAT3, CTNNB1	88	91	16792	23.0659	8.22472e-08	7.47702e-09	6.50183e-08
GOTERM_BP_DIRECT	GO:0045429~positive regulation of nitric oxide biosynthetic process	9	10.2273	4.67467e-11	OPRM1, AKT1, TNF, PTGS2, AGT, EDN1, ESR1, SMAD3, IL1B	88	43	16792	39.9387	1.02796e-07	8.56634e-09	8.12627e-08
GOTERM_BP_DIRECT	GO:0032496~response to lipopolysaccharide	13	14.7727	4.73074e-11	OPRM1, PTGS2, TH, EDN1, TAC1, VCAM1, FOS, CASP3, REN, JUN, CASP8, MPO, NGFR	88	164	16792	15.1258	1.04029e-07	8.00223e-09	8.22373e-08
GOTERM_BP_DIRECT	GO:0010629~negative regulation of gene expression	12	13.6364	1.17347e-10	AKT1, CDC42, ACE, TNF, CD34, AGT, CRH, ESR1, NFKB1, NOS2, SIRT1, TGFB1	88	137	16792	16.714	2.58046e-07	1.84318e-08	2.03991e-07
GOTERM_BP_DIRECT	GO:0045776~negative regulation of blood pressure	8	9.09091	1.44849e-10	CALCA, PPARA, NOS1, DRD2, CRH, NOS3, NOS2, ADIPOQ	88	30	16792	50.8848	3.18524e-07	2.12349e-08	2.518e-07
GOTERM_BP_DIRECT	GO:0045471~response to ethanol	11	12.5	1.58329e-10	IL4, VCAM1, AVP, GRIN2B, CASP8, TH, CRH, NQO1, PTEN, ADIPOQ, STAT3	88	105	16792	19.9905	3.48166e-07	2.17604e-08	2.75233e-07
GOTERM_BP_DIRECT	GO:0031663~lipopolysaccharide-mediated signaling pathway	8	9.09091	2.37492e-10	AKT1, MAPK1, TNF, MAPK14, MAPK3, IL1B, NOS3, TGFB1	88	32	16792	47.7045	5.22244e-07	3.07202e-08	4.12846e-07
GOTERM_BP_DIRECT	GO:0000122~negative regulation of transcription from RNA polymerase II promoter	21	23.8636	5.38519e-10	SREBF1, PPARA, CAV1, TNF, RELA, PPARG, EDN1, TP53, SMAD4, ESR1, SMAD3, NFKB1, ESR2, SIRT1, TGFB1, SHH, STAT3, CTNNB1, VDR, PARP1, SMARCA4	88	720	16792	5.56553	1.1842e-06	6.5789e-08	9.3614e-07
GOTERM_BP_DIRECT	GO:0008285~negative regulation of cell proliferation	16	18.1818	1.6721e-09	OPRM1, AR, PTGS2, DRD2, TP53, SMAD4, PTEN, IL10, PLG, STAT3, TGFB1, CTNNB1, VDR, JUN, IL1B, NOS3	88	396	16792	7.70983	3.67694e-06	1.93523e-07	2.90671e-06
GOTERM_BP_DIRECT	GO:0008284~positive regulation of cell proliferation	17	19.3182	1.85669e-09	CSF2, AR, AVP, RELA, EDN1, SIRT1, PTEN, SHH, STAT3, TGFB1, IGF1R, MAPK1, CHRM1, F2, ADRA2A, CRH, HTR2A	88	466	16792	6.96118	4.08285e-06	2.04143e-07	3.2276e-06
GOTERM_BP_DIRECT	GO:0071222~cellular response to lipopolysaccharide	10	11.3636	6.78227e-09	CSF2, TNF, MAPK14, RELA, SERPINE1, CX3CR1, NFKB1, NOS2, IL10, SRC	88	113	16792	16.8866	1.49141e-05	7.102e-07	1.179e-05
GOTERM_BP_DIRECT	GO:0007267~cell-cell signaling	13	14.7727	7.18958e-09	AVP, AR, EDN1, TAC1, ESR2, IL10, SHH, CALCA, BDNF, ADRB2, ADRB1, AGT, IL1B	88	254	16792	9.76628	1.58098e-05	7.18631e-07	1.24981e-05
GOTERM_BP_DIRECT	GO:0006954~inflammatory response	15	17.0455	8.5131e-09	TNF, PTGS2, RELA, CRP, ANXA1, TAC1, NFKB1, IL10, TGFB1, AKT1, CALCA, FOS, CRH, IL1B, NGFR	88	379	16792	7.55217	1.87201e-05	8.13926e-07	1.47988e-05
GOTERM_BP_DIRECT	GO:0035994~response to muscle stretch	6	6.81818	1.38785e-08	FOS, MAPK14, RELA, JUN, EDN1, NFKB1	88	16	16792	71.5568	3.05184e-05	1.27162e-06	2.41259e-05
GOTERM_BP_DIRECT	GO:0007165~signal transduction	24	27.2727	1.47462e-08	AR, AVP, PPARG, NR3C2, ANXA1, ESR1, NFKB1, NR3C1, ESR2, PRKCD, SRC, STAT3, ATM, AKT1, IGF1R, MAPK1, VDR, HIF1A, CD34, CHRM1, MAPK14, ADRA2A, CRH, IL1B	88	1161	16792	3.94456	3.24263e-05	1.29707e-06	2.56342e-05
GOTERM_BP_DIRECT	GO:0001934~positive regulation of protein phosphorylation	10	11.3636	1.89848e-08	AKT1, TNF, MAPK3, P2RY1, F2, CRH, IL1B, ADIPOQ, SIRT1, TGFB1	88	127	16792	15.0251	4.17466e-05	1.60567e-06	3.30024e-05
GOTERM_BP_DIRECT	GO:0071407~cellular response to organic cyclic compound	8	9.09091	2.15041e-08	AKT1, CASP3, TNF, CASP8, P2RY1, IL1B, TGFB1, STAT3	88	59	16792	25.8737	4.72863e-05	1.75139e-06	3.73818e-05
GOTERM_BP_DIRECT	GO:0042127~regulation of cell proliferation	11	12.5	3.96574e-08	AGTR1, SGK1, TNF, AGT, JUN, ANXA1, NGFR, NOS2, SIRT1, SRC, SHH	88	185	16792	11.3459	8.72027e-05	3.11451e-06	6.89388e-05
GOTERM_BP_DIRECT	GO:0035902~response to immobilization stress	6	6.81818	6.33512e-08	FOS, REN, PPARG, TH, CRH, TGFB1	88	21	16792	54.5195	0.000139299	4.80375e-06	0.000110127
GOTERM_BP_DIRECT	GO:0071260~cellular response to mechanical stimulus	8	9.09091	7.97318e-08	AKT1, PTGS2, AGT, MAPK3, CASP8, IL1B, NFKB1, TGFB1	88	71	16792	21.5006	0.000175315	5.84433e-06	0.000138603
GOTERM_BP_DIRECT	GO:0043525~positive regulation of neuron apoptotic process	7	7.95455	8.48986e-08	CDC42, CASP3, JUN, TP53, NQO1, ATM, CTNNB1	88	43	16792	31.0634	0.000186675	6.02231e-06	0.000147584
GOTERM_BP_DIRECT	GO:0030168~platelet activation	9	10.2273	1.40996e-07	AKT1, MAPK1, MAPK3, P2RY1, F2, ADRA2A, PIK3CA, PRKCD, SRC	88	115	16792	14.9336	0.000310002	9.68903e-06	0.000245102
GOTERM_BP_DIRECT	GO:0051090~regulation of sequence-specific DNA binding transcription factor activity	6	6.81818	1.62732e-07	MAPK1, FOS, SGK1, MAPK14, JUN, MAPK3	88	25	16792	45.7964	0.000357784	1.08438e-05	0.000282887
GOTERM_BP_DIRECT	GO:0050999~regulation of nitric-oxide synthase activity	6	6.81818	2.00659e-07	AKT1, CAV1, CALM3, IL1B, NOS3, CALM1	88	26	16792	44.035	0.000441152	1.29778e-05	0.000348817
GOTERM_BP_DIRECT	GO:0030308~negative regulation of cell growth	9	10.2273	2.09151e-07	AGT, PPARG, TP53, SMAD4, SMAD3, ESR2, SIRT1, TGFB1, SMARCA4	88	121	16792	14.1931	0.000459818	1.31406e-05	0.00036358
GOTERM_BP_DIRECT	GO:0045892~negative regulation of transcription, DNA-templated	15	17.0455	2.58747e-07	IL4, TNF, RELA, PPARG, TP53, SMAD4, SIRT1, ADIPOQ, SRC, TGFB1, CTNNB1, CALCA, VDR, JUN, SMARCA4	88	499	16792	5.73602	0.000568822	1.5805e-05	0.000449794
GOTERM_BP_DIRECT	GO:0018105~peptidyl-serine phosphorylation	9	10.2273	2.68862e-07	AKT1, MAPK1, SGK1, MAPK14, MAPK3, PRKACA, PRKCD, SRC, ATM	88	125	16792	13.7389	0.000591052	1.5979e-05	0.000467378
GOTERM_BP_DIRECT	GO:0019233~sensory perception of pain	7	7.95455	2.73145e-07	OPRM1, MAPK1, PTGS2, MAPK3, EDN1, P2RY1, TAC1	88	52	16792	25.6871	0.000600466	1.58064e-05	0.000474824
GOTERM_BP_DIRECT	GO:0070374~positive regulation of ERK1 and ERK2 cascade	10	11.3636	3.01403e-07	OPRM1, TNF, DRD2, JUN, MAPK3, P2RY1, PTEN, TGFB1, SRC, HTR2A	88	175	16792	10.9039	0.000662566	1.69943e-05	0.000523946
GOTERM_BP_DIRECT	GO:0007204~positive regulation of cytosolic calcium ion concentration	9	10.2273	4.58671e-07	OPRM1, CALCA, AGTR1, AVP, AGT, EDN1, P2RY1, ESR1, TAC1	88	134	16792	12.8161	0.00100811	2.52151e-05	0.000797332
GOTERM_BP_DIRECT	GO:0006809~nitric oxide biosynthetic process	5	5.68182	4.63751e-07	AKT1, NOS1, NOS3, NOS2, NQO1	88	13	16792	73.3916	0.00101927	2.48726e-05	0.000806163
GOTERM_BP_DIRECT	GO:0045019~negative regulation of nitric oxide biosynthetic process	5	5.68182	4.63751e-07	OPRM1, IL4, CAV1, CD34, IL10	88	13	16792	73.3916	0.00101927	2.48726e-05	0.000806163
GOTERM_BP_DIRECT	GO:0071456~cellular response to hypoxia	8	9.09091	6.43789e-07	AKT1, HIF1A, PTGS2, EDN1, TP53, PTEN, SIRT1, SRC	88	96	16792	15.9015	0.00141469	3.37064e-05	0.00111913
GOTERM_BP_DIRECT	GO:0002027~regulation of heart rate	6	6.81818	7.03636e-07	CALCA, DRD2, AGT, CALM3, PRKACA, CALM1	88	33	16792	34.6942	0.0015461	3.5983e-05	0.00122317
GOTERM_BP_DIRECT	GO:0043491~protein kinase B signaling	6	6.81818	7.03636e-07	AKT1, TNF, PIK3CA, IL1B, PTEN, TGFB1	88	33	16792	34.6942	0.0015461	3.5983e-05	0.00122317
GOTERM_BP_DIRECT	GO:0032270~positive regulation of cellular protein metabolic process	5	5.68182	8.7836e-07	AKT1, AGTR1, AGT, ADIPOQ, TGFB1	88	15	16792	63.6061	0.00192965	4.38971e-05	0.0015269
GOTERM_BP_DIRECT	GO:0035690~cellular response to drug	7	7.95455	1.49915e-06	REN, EDN1, TH, TP53, IL1B, NOS2, ADIPOQ	88	69	16792	19.3584	0.00329121	7.32559e-05	0.00260604
GOTERM_BP_DIRECT	GO:0033138~positive regulation of peptidyl-serine phosphorylation	7	7.95455	1.63293e-06	AKT1, CDC42, CAV1, AVP, TNF, PIK3CA, TGFB1	88	70	16792	19.0818	0.00358438	7.80582e-05	0.00283859
GOTERM_BP_DIRECT	GO:1901215~negative regulation of neuron death	6	6.81818	1.89602e-06	AKT1, PPARA, CD34, SIRT1, STAT3, CTNNB1	88	40	16792	28.6227	0.00416066	8.87054e-05	0.00329591
GOTERM_BP_DIRECT	GO:0051412~response to corticosterone	5	5.68182	1.94583e-06	FOS, TH, CRH, CALM3, CALM1	88	18	16792	53.0051	0.00426975	8.91395e-05	0.0033825
GOTERM_BP_DIRECT	GO:0001525~angiogenesis	10	11.3636	2.28474e-06	CAV1, HIF1A, PTGS2, MAPK14, JUN, SERPINE1, PIK3CA, NOS3, PTEN, SIRT1	88	223	16792	8.55687	0.00501155	0.000102528	0.00397163
GOTERM_BP_DIRECT	GO:0002052~positive regulation of neuroblast proliferation	5	5.68182	3.05662e-06	HIF1A, DRD2, CX3CR1, SHH, CTNNB1	88	20	16792	47.7045	0.00669898	0.000134421	0.00531337
GOTERM_BP_DIRECT	GO:0071375~cellular response to peptide hormone stimulus	5	5.68182	3.05662e-06	CAV1, RELA, EDN1, NFKB1, SRC	88	20	16792	47.7045	0.00669898	0.000134421	0.00531337
GOTERM_BP_DIRECT	GO:0019229~regulation of vasoconstriction	5	5.68182	3.05662e-06	AGTR1, ACE, AGT, EDN1, ADRA2A	88	20	16792	47.7045	0.00669898	0.000134421	0.00531337
GOTERM_BP_DIRECT	GO:0002028~regulation of sodium ion transport	5	5.68182	3.76092e-06	ADRB2, NOS1, DRD2, NOS3, TGFB1	88	21	16792	45.4329	0.00823617	0.000162149	0.00653763
GOTERM_BP_DIRECT	GO:0038095~Fc-epsilon receptor signaling pathway	9	10.2273	3.90056e-06	MAPK1, FOS, RELA, JUN, MAPK3, CALM3, PIK3CA, NFKB1, CALM1	88	178	16792	9.64811	0.00854068	0.000164936	0.00678037
GOTERM_BP_DIRECT	GO:0051000~positive regulation of nitric-oxide synthase activity	5	5.68182	4.57853e-06	AKT1, HIF1A, ESR1, CALM3, CALM1	88	22	16792	43.3678	0.0100177	0.000189948	0.00795884
GOTERM_BP_DIRECT	GO:0071316~cellular response to nicotine	4	4.54545	7.38303e-06	TNF, RELA, TH, NFKB1	88	8	16792	95.4091	0.0161043	0.000300609	0.0128336
GOTERM_BP_DIRECT	GO:0007179~transforming growth factor beta receptor signaling pathway	7	7.95455	8.10876e-06	FOS, JUN, SMAD4, SMAD3, PARP1, TGFB1, SRC	88	92	16792	14.5188	0.0176732	0.000324152	0.014095
GOTERM_BP_DIRECT	GO:0000165~MAPK cascade	10	11.3636	8.47957e-06	CSF2, MAPK1, CAV1, TNF, GRIN2B, MAPK3, CALM3, IL1B, TGFB1, CALM1	88	262	16792	7.28314	0.0184739	0.00033292	0.0147395
GOTERM_BP_DIRECT	GO:0032757~positive regulation of interleukin-8 production	5	5.68182	9.21052e-06	CALCA, TNF, SERPINE1, IL1B, ADIPOQ	88	26	16792	36.6958	0.0200503	0.000355271	0.01601
GOTERM_BP_DIRECT	GO:0032930~positive regulation of superoxide anion generation	4	4.54545	1.1033e-05	AGT, CRP, PRKCD, TGFB1	88	9	16792	84.8081	0.0239698	0.000418219	0.0191777
GOTERM_BP_DIRECT	GO:0043406~positive regulation of MAP kinase activity	6	6.81818	1.3353e-05	TNF, EDN1, ADRA2A, TGFB1, SRC, HTR2A	88	59	16792	19.4052	0.0289365	0.000497562	0.0232098
GOTERM_BP_DIRECT	GO:0006367~transcription initiation from RNA polymerase II promoter	8	9.09091	1.38249e-05	VDR, PPARA, AR, PPARG, NR3C2, ESR1, NR3C1, ESR2	88	152	16792	10.0431	0.0299438	0.000506559	0.02403
GOTERM_BP_DIRECT	GO:0042593~glucose homeostasis	7	7.95455	1.38859e-05	AKT1, HIF1A, PPARG, ADRA2A, NGFR, ADIPOQ, STAT3	88	101	16792	13.225	0.0300737	0.000500452	0.0241359
GOTERM_BP_DIRECT	GO:0045909~positive regulation of vasodilation	5	5.68182	1.44602e-05	CALCA, NOS1, AGT, NOS3, NOS2	88	29	16792	32.8997	0.0312981	0.000512745	0.0251342
GOTERM_BP_DIRECT	GO:2000379~positive regulation of reactive oxygen species metabolic process	5	5.68182	1.66191e-05	AGTR1, AGT, MAPK14, F2, TP53	88	30	16792	31.803	0.035886	0.000579922	0.0288861
GOTERM_BP_DIRECT	GO:0045907~positive regulation of vasoconstriction	5	5.68182	2.16355e-05	AKT1, CAV1, AVP, PTGS2, HTR2A	88	32	16792	29.8153	0.0464628	0.000743112	0.0376036
GOTERM_BP_DIRECT	GO:0007200~phospholipase C-activating G-protein coupled receptor signaling pathway	6	6.81818	2.31682e-05	OPRM1, AGTR1, AGT, P2RY1, ESR1, HTR2A	88	66	16792	17.3471	0.0496713	0.000783499	0.040267
GOTERM_BP_DIRECT	GO:0043065~positive regulation of apoptotic process	10	11.3636	2.48982e-05	AKT1, TNF, PTGS2, TP53, NGFR, SIRT1, TGFB1, SRC, ATM, CTNNB1	88	300	16792	6.36061	0.0532799	0.000829228	0.0432732
GOTERM_BP_DIRECT	GO:0042312~regulation of vasodilation	4	4.54545	2.85724e-05	AGTR1, ACE, ADRB2, P2RY1	88	12	16792	63.6061	0.0608984	0.000937346	0.0496576
GOTERM_BP_DIRECT	GO:0035815~positive regulation of renal sodium excretion	4	4.54545	2.85724e-05	DRD2, AGT, EDN1, TAC1	88	12	16792	63.6061	0.0608984	0.000937346	0.0496576
GOTERM_BP_DIRECT	GO:0045766~positive regulation of angiogenesis	7	7.95455	2.90979e-05	HIF1A, CD34, SERPINE1, CX3CR1, IL1B, NOS3, SIRT1	88	115	16792	11.615	0.0619829	0.000940545	0.0505705
GOTERM_BP_DIRECT	GO:0006915~apoptotic process	13	14.7727	3.44588e-05	MAPK1, CASP3, SGK1, AVP, MAPK14, CASP8, MAPK3, TP53, IL1B, NFKB1, NR3C1, PRKCD, PTEN	88	567	16792	4.37502	0.0729764	0.0010976	0.059885
GOTERM_BP_DIRECT	GO:0009409~response to cold	5	5.68182	3.48849e-05	FOS, ADRB2, ADRB1, CASP8, PPARG	88	36	16792	26.5025	0.0738447	0.0010953	0.0606253
GOTERM_BP_DIRECT	GO:0051926~negative regulation of calcium ion transport	4	4.54545	3.7005e-05	NOS1, PTGS2, ADRA2A, NOS3	88	13	16792	58.7133	0.0781526	0.00114548	0.0643086
GOTERM_BP_DIRECT	GO:0010745~negative regulation of macrophage derived foam cell differentiation	4	4.54545	3.7005e-05	PPARA, CRP, PPARG, ADIPOQ	88	13	16792	58.7133	0.0781526	0.00114548	0.0643086
GOTERM_BP_DIRECT	GO:0035094~response to nicotine	5	5.68182	3.89593e-05	VCAM1, CASP3, AVP, DRD2, EDN1	88	37	16792	25.7862	0.0821058	0.0011892	0.0677037
GOTERM_BP_DIRECT	GO:2001240~negative regulation of extrinsic apoptotic signaling pathway in absence of ligand	5	5.68182	3.89593e-05	AKT1, CSF2, TNF, CX3CR1, IL1B	88	37	16792	25.7862	0.0821058	0.0011892	0.0677037
GOTERM_BP_DIRECT	GO:0007584~response to nutrient	6	6.81818	4.04257e-05	IL4, VCAM1, PPARG, NQO1, PTEN, ADIPOQ	88	74	16792	15.4717	0.0850611	0.00121704	0.0702513
GOTERM_BP_DIRECT	GO:0007507~heart development	8	9.09091	4.56308e-05	PPARA, EDN1, PPARG, TH, PTEN, TGFB1, ATM, SHH	88	183	16792	8.34178	0.0954741	0.00135509	0.0792931
GOTERM_BP_DIRECT	GO:0032570~response to progesterone	5	5.68182	4.81375e-05	SREBF1, FOS, CAV1, RELA, TGFB1	88	39	16792	24.4639	0.100447	0.00141043	0.0836474
GOTERM_BP_DIRECT	GO:0032869~cellular response to insulin stimulus	6	6.81818	4.89831e-05	AKT1, SP1, PPARG, PARP1, ADIPOQ, SRC	88	77	16792	14.8689	0.102118	0.00141632	0.0851162
GOTERM_BP_DIRECT	GO:0038096~Fc-gamma receptor signaling pathway involved in phagocytosis	7	7.95455	5.08762e-05	ACTB, CDC42, MAPK1, MAPK3, PIK3CA, PRKCD, SRC	88	127	16792	10.5175	0.105848	0.00145193	0.0884044
GOTERM_BP_DIRECT	GO:0007190~activation of adenylate cyclase activity	5	5.68182	5.32755e-05	CALCA, ADRB2, ADRB1, CALM3, CALM1	88	40	16792	23.8523	0.110554	0.00150087	0.0925716
GOTERM_BP_DIRECT	GO:0045599~negative regulation of fat cell differentiation	5	5.68182	6.47363e-05	TNF, SMAD3, ADIPOQ, SIRT1, TGFB1	88	42	16792	22.7165	0.132691	0.0018004	0.112475
GOTERM_BP_DIRECT	GO:0051092~positive regulation of NF-kappaB transcription factor activity	7	7.95455	6.5832e-05	AR, TNF, AGT, RELA, IL1B, NFKB1, TGFB1	88	133	16792	10.0431	0.134778	0.00180798	0.114378
GOTERM_BP_DIRECT	GO:0050731~positive regulation of peptidyl-tyrosine phosphorylation	6	6.81818	6.62866e-05	AGT, TP53, ADIPOQ, TGFB1, SRC, HTR2A	88	82	16792	13.9623	0.135643	0.001798	0.115167
GOTERM_BP_DIRECT	GO:0006919~activation of cysteine-type endopeptidase activity involved in apoptotic process	6	6.81818	7.02502e-05	CASP3, TNF, CASP8, PPARG, SMAD3, NGFR	88	83	16792	13.7941	0.143144	0.0018822	0.12205
GOTERM_BP_DIRECT	GO:0042307~positive regulation of protein import into nucleus	4	4.54545	7.16466e-05	MAPK14, PRKCD, TGFB1, SHH	88	16	16792	47.7045	0.145771	0.00189647	0.124475
GOTERM_BP_DIRECT	GO:0010744~positive regulation of macrophage derived foam cell differentiation	4	4.54545	7.16466e-05	CSF2, AGTR1, AGT, NFKB1	88	16	16792	47.7045	0.145771	0.00189647	0.124475
GOTERM_BP_DIRECT	GO:0032147~activation of protein kinase activity	5	5.68182	8.51597e-05	CALCA, DRD2, ADRA2A, PIK3CA, PRKCD	88	45	16792	21.202	0.170784	0.00222697	0.147935
GOTERM_BP_DIRECT	GO:0051591~response to cAMP	5	5.68182	9.2903e-05	SREBF1, FOS, REN, RELA, JUN	88	46	16792	20.7411	0.184785	0.00240068	0.161376
GOTERM_BP_DIRECT	GO:0007565~female pregnancy	6	6.81818	9.80154e-05	IL4, FOS, SP1, AGT, CRH, TGFB1	88	89	16792	12.8641	0.193899	0.00250322	0.170249
GOTERM_BP_DIRECT	GO:0006974~cellular response to DNA damage stimulus	8	9.09091	0.000102203	AKT1, MAPK1, SGK1, MAPK3, TP53, PARP1, SIRT1, ATM	88	208	16792	7.33916	0.201289	0.00258007	0.177517
GOTERM_BP_DIRECT	GO:0030225~macrophage differentiation	4	4.54545	0.000103619	CDC42, CASP8, PARP1, SIRT1	88	18	16792	42.404	0.203773	0.00258609	0.179975
GOTERM_BP_DIRECT	GO:0031293~membrane protein intracellular domain proteolysis	4	4.54545	0.000103619	RELA, NFKB1, NGFR, TGFB1	88	18	16792	42.404	0.203773	0.00258609	0.179975
GOTERM_BP_DIRECT	GO:0035066~positive regulation of histone acetylation	4	4.54545	0.000103619	NOS1, MAPK3, IL1B, TGFB1	88	18	16792	42.404	0.203773	0.00258609	0.179975
GOTERM_BP_DIRECT	GO:0007263~nitric oxide mediated signal transduction	4	4.54545	0.000122588	NOS1, AGT, NOS3, NOS2	88	19	16792	40.1722	0.236305	0.00302448	0.212888
GOTERM_BP_DIRECT	GO:0060314~regulation of ryanodine-sensitive calcium-release channel activity	4	4.54545	0.000122588	NOS1, CALM3, PRKACA, CALM1	88	19	16792	40.1722	0.236305	0.00302448	0.212888
GOTERM_BP_DIRECT	GO:0071880~adenylate cyclase-activating adrenergic receptor signaling pathway	4	4.54545	0.000122588	ADRB2, ADRB1, DRD2, ADRA2A	88	19	16792	40.1722	0.236305	0.00302448	0.212888
GOTERM_BP_DIRECT	GO:0001659~temperature homeostasis	4	4.54545	0.000122588	ADRB1, DRD2, STAT3, HTR2A	88	19	16792	40.1722	0.236305	0.00302448	0.212888
GOTERM_BP_DIRECT	GO:0030336~negative regulation of cell migration	6	6.81818	0.000133532	DRD2, SERPINE1, CX3CR1, PTEN, ADIPOQ, SHH	88	95	16792	12.0517	0.254468	0.00325753	0.231873
GOTERM_BP_DIRECT	GO:0051098~regulation of binding	3	3.40909	0.000158144	SMAD4, SMAD3, TGFB1	88	4	16792	143.114	0.293751	0.00381454	0.274556
GOTERM_BP_DIRECT	GO:0031394~positive regulation of prostaglandin biosynthetic process	3	3.40909	0.000158144	AVP, PTGS2, ANXA1	88	4	16792	143.114	0.293751	0.00381454	0.274556
GOTERM_BP_DIRECT	GO:0032909~regulation of transforming growth factor beta2 production	3	3.40909	0.000158144	HIF1A, SMAD4, SMAD3	88	4	16792	143.114	0.293751	0.00381454	0.274556
GOTERM_BP_DIRECT	GO:0035813~regulation of renal sodium excretion	3	3.40909	0.000158144	AGTR1, AVP, AGT	88	4	16792	143.114	0.293751	0.00381454	0.274556
GOTERM_BP_DIRECT	GO:0071677~positive regulation of mononuclear cell migration	3	3.40909	0.000158144	IL4, TNF, TGFB1	88	4	16792	143.114	0.293751	0.00381454	0.274556
GOTERM_BP_DIRECT	GO:0042482~positive regulation of odontogenesis	3	3.40909	0.000158144	CD34, EDN1, TGFB1	88	4	16792	143.114	0.293751	0.00381454	0.274556
GOTERM_BP_DIRECT	GO:0045986~negative regulation of smooth muscle contraction	3	3.40909	0.000158144	CALCA, ADRB2, PTGS2	88	4	16792	143.114	0.293751	0.00381454	0.274556
GOTERM_BP_DIRECT	GO:0002018~renin-angiotensin regulation of aldosterone production	3	3.40909	0.000158144	AGTR1, REN, AGT	88	4	16792	143.114	0.293751	0.00381454	0.274556
GOTERM_BP_DIRECT	GO:0035307~positive regulation of protein dephosphorylation	4	4.54545	0.000167002	CALM3, PRKCD, TGFB1, CALM1	88	21	16792	36.3463	0.307375	0.00398408	0.289912
GOTERM_BP_DIRECT	GO:0055117~regulation of cardiac muscle contraction	4	4.54545	0.000167002	NOS1, CALM3, PRKACA, CALM1	88	21	16792	36.3463	0.307375	0.00398408	0.289912
GOTERM_BP_DIRECT	GO:1900182~positive regulation of protein localization to nucleus	4	4.54545	0.000167002	AKT1, F2, NGFR, SRC	88	21	16792	36.3463	0.307375	0.00398408	0.289912
GOTERM_BP_DIRECT	GO:0032094~response to food	4	4.54545	0.000167002	OPRM1, AKT1, SREBF1, MPO	88	21	16792	36.3463	0.307375	0.00398408	0.289912
GOTERM_BP_DIRECT	GO:0043401~steroid hormone mediated signaling pathway	5	5.68182	0.000215344	VDR, PPARA, PPARG, NR3C2, ESR1	88	57	16792	16.7384	0.377239	0.00507944	0.373685
GOTERM_BP_DIRECT	GO:0009612~response to mechanical stimulus	5	5.68182	0.00024617	JUN, P2RY1, PPARG, MPO, SRC	88	59	16792	16.171	0.418064	0.00574297	0.427071
GOTERM_BP_DIRECT	GO:0070371~ERK1 and ERK2 cascade	4	4.54545	0.000251305	MAPK1, AVP, AGT, MAPK3	88	24	16792	31.803	0.424599	0.00580088	0.43596
GOTERM_BP_DIRECT	GO:0031622~positive regulation of fever generation	3	3.40909	0.000262685	TNF, PTGS2, IL1B	88	5	16792	114.491	0.438824	0.00599985	0.455661
GOTERM_BP_DIRECT	GO:0072584~caveolin-mediated endocytosis	3	3.40909	0.000262685	MAPK1, CAV1, MAPK3	88	5	16792	114.491	0.438824	0.00599985	0.455661
GOTERM_BP_DIRECT	GO:0048661~positive regulation of smooth muscle cell proliferation	5	5.68182	0.000262718	AKT1, TNF, PTGS2, JUN, EDN1	88	60	16792	15.9015	0.438864	0.00593891	0.455717
GOTERM_BP_DIRECT	GO:0051899~membrane depolarization	4	4.54545	0.000284506	CAV1, JUN, EDN1, ADIPOQ	88	25	16792	30.5309	0.465123	0.00636455	0.493424
GOTERM_BP_DIRECT	GO:0030878~thyroid gland development	4	4.54545	0.000284506	MAPK1, MAPK3, SMAD3, SHH	88	25	16792	30.5309	0.465123	0.00636455	0.493424
GOTERM_BP_DIRECT	GO:0034612~response to tumor necrosis factor	4	4.54545	0.000284506	CASP3, PTGS2, CASP8, ADIPOQ	88	25	16792	30.5309	0.465123	0.00636455	0.493424
GOTERM_BP_DIRECT	GO:0060395~SMAD protein signal transduction	5	5.68182	0.000298187	FOS, JUN, SMAD4, SMAD3, TGFB1	88	62	16792	15.3886	0.480979	0.00660247	0.517093
GOTERM_BP_DIRECT	GO:0007613~memory	5	5.68182	0.000298187	PTGS2, TH, CX3CR1, PTEN, HTR2A	88	62	16792	15.3886	0.480979	0.00660247	0.517093
GOTERM_BP_DIRECT	GO:0050727~regulation of inflammatory response	5	5.68182	0.000317153	AGTR1, PTGS2, RELA, ANXA1, ESR1	88	63	16792	15.1443	0.502187	0.00695103	0.549896
GOTERM_BP_DIRECT	GO:0042755~eating behavior	4	4.54545	0.000320415	OPRM1, P2RY1, TH, STAT3	88	26	16792	29.3566	0.505745	0.00695299	0.555537
GOTERM_BP_DIRECT	GO:0051384~response to glucocorticoid	5	5.68182	0.000357654	CASP3, TNF, PTGS2, ADIPOQ, IL10	88	65	16792	14.6783	0.54462	0.00768233	0.619914
GOTERM_BP_DIRECT	GO:0043627~response to estrogen	5	5.68182	0.000357654	MAPK1, CAV1, PPARG, CRH, ESR1	88	65	16792	14.6783	0.54462	0.00768233	0.619914
GOTERM_BP_DIRECT	GO:0010800~positive regulation of peptidyl-threonine phosphorylation	4	4.54545	0.00035912	MAPK1, CALM3, TGFB1, CALM1	88	27	16792	28.2694	0.546086	0.00763909	0.622448
GOTERM_BP_DIRECT	GO:0010575~positive regulation of vascular endothelial growth factor production	4	4.54545	0.00035912	HIF1A, PTGS2, IL1B, TGFB1	88	27	16792	28.2694	0.546086	0.00763909	0.622448
GOTERM_BP_DIRECT	GO:0003081~regulation of systemic arterial blood pressure by renin-angiotensin	3	3.40909	0.0003927	AGTR1, ACE, AGT	88	6	16792	95.4091	0.578407	0.00827057	0.680462
GOTERM_BP_DIRECT	GO:0060440~trachea formation	3	3.40909	0.0003927	MAPK1, MAPK3, CTNNB1	88	6	16792	95.4091	0.578407	0.00827057	0.680462
GOTERM_BP_DIRECT	GO:0051482~positive regulation of cytosolic calcium ion concentration involved in phospholipase C-activating G-protein coupled signaling pathway	4	4.54545	0.000400713	CALCA, AGTR1, DRD2, EDN1	88	28	16792	27.2597	0.585774	0.00835863	0.694302
GOTERM_BP_DIRECT	GO:0006006~glucose metabolic process	5	5.68182	0.000401729	AKT1, TNF, MAPK14, PIK3CA, ADIPOQ	88	67	16792	14.2402	0.5867	0.00830102	0.696057
GOTERM_BP_DIRECT	GO:0009749~response to glucose	5	5.68182	0.000425162	SREBF1, CASP3, PTEN, ADIPOQ, TGFB1	88	68	16792	14.0307	0.607465	0.00870146	0.736517
GOTERM_BP_DIRECT	GO:0043542~endothelial cell migration	4	4.54545	0.00044528	CALCA, PIK3CA, NOS3, PTEN	88	29	16792	26.3197	0.62446	0.00902743	0.771241
GOTERM_BP_DIRECT	GO:0097190~apoptotic signaling pathway	5	5.68182	0.000501309	CAV1, CASP3, CASP8, NGFR, SHH	88	71	16792	13.4379	0.668011	0.0100651	0.867886
GOTERM_BP_DIRECT	GO:0048010~vascular endothelial growth factor receptor signaling pathway	5	5.68182	0.000528715	ACTB, CDC42, MAPK14, PIK3CA, SRC	88	72	16792	13.2513	0.687438	0.0105166	0.915128
GOTERM_BP_DIRECT	GO:0001975~response to amphetamine	4	4.54545	0.000543685	DRD2, TH, CALM3, CALM1	88	31	16792	24.6217	0.697565	0.0107159	0.940923
GOTERM_BP_DIRECT	GO:0071479~cellular response to ionizing radiation	4	4.54545	0.000543685	MAPK14, TP53, SIRT1, TGFB1	88	31	16792	24.6217	0.697565	0.0107159	0.940923
GOTERM_BP_DIRECT	GO:0044321~response to leptin	3	3.40909	0.000547927	EDN1, SIRT1, STAT3	88	7	16792	81.7792	0.700374	0.0107032	0.948231
GOTERM_BP_DIRECT	GO:0010700~negative regulation of norepinephrine secretion	3	3.40909	0.000547927	P2RY1, ADRA2A, CRH	88	7	16792	81.7792	0.700374	0.0107032	0.948231
GOTERM_BP_DIRECT	GO:0007166~cell surface receptor signaling pathway	8	9.09091	0.00054808	ADRB2, AGT, MAPK14, EDN1, CASP8, P2RY1, F2, ANXA1	88	274	16792	5.57133	0.700476	0.010612	0.948496
GOTERM_BP_DIRECT	GO:0006468~protein phosphorylation	10	11.3636	0.000583999	CALCA, AKT1, MAPK1, SGK1, MAPK3, PIK3CA, PRKACA, PRKCD, TGFB1, ATM	88	456	16792	4.18461	0.723235	0.0112051	1.01036
GOTERM_BP_DIRECT	GO:0050873~brown fat cell differentiation	4	4.54545	0.00059769	ADRB2, ADRB1, PTGS2, ADIPOQ	88	32	16792	23.8523	0.731449	0.0113672	1.03393
GOTERM_BP_DIRECT	GO:0032212~positive regulation of telomere maintenance via telomerase	4	4.54545	0.00059769	MAPK1, MAPK3, ATM, CTNNB1	88	32	16792	23.8523	0.731449	0.0113672	1.03393
GOTERM_BP_DIRECT	GO:0051480~regulation of cytosolic calcium ion concentration	4	4.54545	0.00059769	CALCA, CAV1, F2, PRKACA	88	32	16792	23.8523	0.731449	0.0113672	1.03393
GOTERM_BP_DIRECT	GO:0008283~cell proliferation	9	10.2273	0.000616105	AKT1, AR, CD34, CHRM1, TP53, SMAD4, PTEN, SRC, STAT3	88	366	16792	4.69225	0.742113	0.0116151	1.06562
GOTERM_BP_DIRECT	GO:0007623~circadian rhythm	5	5.68182	0.000617323	SREBF1, JUN, SERPINE1, NOS2, ADIPOQ	88	75	16792	12.7212	0.742803	0.011539	1.06772
GOTERM_BP_DIRECT	GO:0010634~positive regulation of epithelial cell migration	4	4.54545	0.000655007	HIF1A, JUN, TAC1, SRC	88	33	16792	23.1295	0.763269	0.0121362	1.13255
GOTERM_BP_DIRECT	GO:0010718~positive regulation of epithelial to mesenchymal transition	4	4.54545	0.000655007	SMAD4, SMAD3, TGFB1, CTNNB1	88	33	16792	23.1295	0.763269	0.0121362	1.13255
GOTERM_BP_DIRECT	GO:0031295~T cell costimulation	5	5.68182	0.000715989	AKT1, CDC42, CAV1, PIK3CA, SRC	88	78	16792	12.2319	0.792998	0.0131483	1.23737
GOTERM_BP_DIRECT	GO:1901844~regulation of cell communication by electrical coupling involved in cardiac conduction	3	3.40909	0.000728108	CAV1, CALM3, CALM1	88	8	16792	71.5568	0.798445	0.0132588	1.25819
GOTERM_BP_DIRECT	GO:0045348~positive regulation of MHC class II biosynthetic process	3	3.40909	0.000728108	IL4, SIRT1, IL10	88	8	16792	71.5568	0.798445	0.0132588	1.25819
GOTERM_BP_DIRECT	GO:0006527~arginine catabolic process	3	3.40909	0.000728108	NOS1, NOS3, NOS2	88	8	16792	71.5568	0.798445	0.0132588	1.25819
GOTERM_BP_DIRECT	GO:0033129~positive regulation of histone phosphorylation	3	3.40909	0.000728108	MAPK3, IL1B, ATM	88	8	16792	71.5568	0.798445	0.0132588	1.25819
GOTERM_BP_DIRECT	GO:2000641~regulation of early endosome to late endosome transport	3	3.40909	0.000728108	MAPK1, MAPK3, SRC	88	8	16792	71.5568	0.798445	0.0132588	1.25819
GOTERM_BP_DIRECT	GO:0030850~prostate gland development	3	3.40909	0.000728108	AR, ANXA1, SHH	88	8	16792	71.5568	0.798445	0.0132588	1.25819
GOTERM_BP_DIRECT	GO:0007183~SMAD protein complex assembly	3	3.40909	0.000728108	SMAD4, SMAD3, TGFB1	88	8	16792	71.5568	0.798445	0.0132588	1.25819
GOTERM_BP_DIRECT	GO:0050728~negative regulation of inflammatory response	5	5.68182	0.00075122	PPARA, SMAD3, NFKB1, PRKCD, ADIPOQ	88	79	16792	12.0771	0.80844	0.0135646	1.29789
GOTERM_BP_DIRECT	GO:0042981~regulation of apoptotic process	7	7.95455	0.000834514	SGK1, CASP8, TP53, ESR1, NGFR, TGFB1, ATM	88	213	16792	6.27102	0.840524	0.0149354	1.44081
GOTERM_BP_DIRECT	GO:0007611~learning or memory	4	4.54545	0.000847624	CASP3, GRIN2B, CRH, PTEN	88	36	16792	21.202	0.84506	0.0150459	1.46329
GOTERM_BP_DIRECT	GO:0060070~canonical Wnt signaling pathway	5	5.68182	0.000904457	CDC42, SMAD3, PTEN, SHH, CTNNB1	88	83	16792	11.4951	0.863277	0.0159187	1.56068
GOTERM_BP_DIRECT	GO:0016032~viral process	8	9.09091	0.000916287	VCAM1, MAPK1, SP1, MAPK3, CX3CR1, TP53, SIRT1, STAT3	88	299	16792	5.1055	0.866791	0.0159974	1.58094
GOTERM_BP_DIRECT	GO:0060020~Bergmann glial cell differentiation	3	3.40909	0.000932986	MAPK1, MAPK3, SHH	88	9	16792	63.6061	0.871599	0.0161585	1.60953
GOTERM_BP_DIRECT	GO:0048617~embryonic foregut morphogenesis	3	3.40909	0.000932986	SMAD3, SHH, CTNNB1	88	9	16792	63.6061	0.871599	0.0161585	1.60953
GOTERM_BP_DIRECT	GO:0010469~regulation of receptor activity	3	3.40909	0.000932986	P2RY1, SERPINE1, PRKCD	88	9	16792	63.6061	0.871599	0.0161585	1.60953
GOTERM_BP_DIRECT	GO:0014824~artery smooth muscle contraction	3	3.40909	0.000932986	AGT, EDN1, HTR2A	88	9	16792	63.6061	0.871599	0.0161585	1.60953
GOTERM_BP_DIRECT	GO:0034405~response to fluid shear stress	3	3.40909	0.000932986	AKT1, CSF2, NOS3	88	9	16792	63.6061	0.871599	0.0161585	1.60953
GOTERM_BP_DIRECT	GO:0007626~locomotory behavior	5	5.68182	0.00094596	OPRM1, AVP, DRD2, TH, PTEN	88	84	16792	11.3582	0.875214	0.0162535	1.63174
GOTERM_BP_DIRECT	GO:0009636~response to toxic substance	5	5.68182	0.000988787	MAPK1, FOS, DRD2, MAPK3, NQO1	88	85	16792	11.2246	0.886439	0.0168518	1.70502
GOTERM_BP_DIRECT	GO:0018107~peptidyl-threonine phosphorylation	4	4.54545	0.000994028	AKT1, MAPK1, PRKACA, PRKCD	88	38	16792	20.0861	0.887742	0.0168102	1.71398
GOTERM_BP_DIRECT	GO:2001237~negative regulation of extrinsic apoptotic signaling pathway	4	4.54545	0.000994028	IL4, AR, RELA, SRC	88	38	16792	20.0861	0.887742	0.0168102	1.71398
GOTERM_BP_DIRECT	GO:0006928~movement of cell or subcellular component	5	5.68182	0.00103296	ACTB, PTGS2, MAPK14, ADRA2A, STAT3	88	86	16792	11.0941	0.896961	0.01733	1.78054
GOTERM_BP_DIRECT	GO:0043124~negative regulation of I-kappaB kinase/NF-kappaB signaling	4	4.54545	0.00115552	CASP8, ESR1, ADIPOQ, SIRT1	88	40	16792	19.0818	0.921327	0.019221	1.98981
GOTERM_BP_DIRECT	GO:0030819~positive regulation of cAMP biosynthetic process	4	4.54545	0.00115552	CALCA, AVP, ADRB1, CRH	88	40	16792	19.0818	0.921327	0.019221	1.98981
GOTERM_BP_DIRECT	GO:0071803~positive regulation of podosome assembly	3	3.40909	0.00116231	CSF2, TNF, SRC	88	10	16792	57.2455	0.922494	0.0191878	2.00139
GOTERM_BP_DIRECT	GO:0051481~negative regulation of cytosolic calcium ion concentration	3	3.40909	0.00116231	OPRM1, DRD2, SMAD3	88	10	16792	57.2455	0.922494	0.0191878	2.00139
GOTERM_BP_DIRECT	GO:0045080~positive regulation of chemokine biosynthetic process	3	3.40909	0.00116231	IL4, TNF, IL1B	88	10	16792	57.2455	0.922494	0.0191878	2.00139
GOTERM_BP_DIRECT	GO:0043267~negative regulation of potassium ion transport	3	3.40909	0.00116231	NOS1, NOS3, HTR2A	88	10	16792	57.2455	0.922494	0.0191878	2.00139
GOTERM_BP_DIRECT	GO:0051918~negative regulation of fibrinolysis	3	3.40909	0.00116231	F2, SERPINE1, PLG	88	10	16792	57.2455	0.922494	0.0191878	2.00139
GOTERM_BP_DIRECT	GO:0050765~negative regulation of phagocytosis	3	3.40909	0.00116231	PTEN, ADIPOQ, TGFB1	88	10	16792	57.2455	0.922494	0.0191878	2.00139
GOTERM_BP_DIRECT	GO:0045740~positive regulation of DNA replication	4	4.54545	0.00133267	CSF2, CDC42, IGF1R, JUN	88	42	16792	18.1732	0.946736	0.0218075	2.29154
GOTERM_BP_DIRECT	GO:0097191~extrinsic apoptotic signaling pathway	4	4.54545	0.00133267	TNF, CASP8, SMAD3, TGFB1	88	42	16792	18.1732	0.946736	0.0218075	2.29154
GOTERM_BP_DIRECT	GO:0006366~transcription from RNA polymerase II promoter	10	11.3636	0.00133895	FOS, HIF1A, RELA, JUN, TP53, SMAD4, ESR1, NFKB1, NR3C1, PARP1	88	513	16792	3.71965	0.947467	0.0217475	2.30222
GOTERM_BP_DIRECT	GO:0006874~cellular calcium ion homeostasis	5	5.68182	0.00138179	VDR, CAV1, DRD2, TGFB1, HTR2A	88	93	16792	10.259	0.952197	0.0222716	2.37505
GOTERM_BP_DIRECT	GO:0007411~axon guidance	6	6.81818	0.00141408	MAPK1, BDNF, MAPK3, SMAD4, NGFR, SHH	88	159	16792	7.20069	0.955478	0.0226209	2.42991
GOTERM_BP_DIRECT	GO:0031065~positive regulation of histone deacetylation	3	3.40909	0.00141582	SREBF1, TP53, TGFB1	88	11	16792	52.0413	0.955648	0.0224849	2.43286
GOTERM_BP_DIRECT	GO:0034116~positive regulation of heterotypic cell-cell adhesion	3	3.40909	0.00141582	TNF, IL1B, IL10	88	11	16792	52.0413	0.955648	0.0224849	2.43286
GOTERM_BP_DIRECT	GO:0002003~angiotensin maturation	3	3.40909	0.00141582	ACE, REN, AGT	88	11	16792	52.0413	0.955648	0.0224849	2.43286
GOTERM_BP_DIRECT	GO:0031284~positive regulation of guanylate cyclase activity	3	3.40909	0.00141582	NOS1, NOS3, NOS2	88	11	16792	52.0413	0.955648	0.0224849	2.43286
GOTERM_BP_DIRECT	GO:0034374~low-density lipoprotein particle remodeling	3	3.40909	0.00141582	AGTR1, AGT, MPO	88	11	16792	52.0413	0.955648	0.0224849	2.43286
GOTERM_BP_DIRECT	GO:0030278~regulation of ossification	3	3.40909	0.00141582	MAPK1, MAPK14, MAPK3	88	11	16792	52.0413	0.955648	0.0224849	2.43286
GOTERM_BP_DIRECT	GO:0048538~thymus development	4	4.54545	0.00142729	MAPK1, MAPK3, SHH, CTNNB1	88	43	16792	17.7505	0.956754	0.0225027	2.45234
GOTERM_BP_DIRECT	GO:0014823~response to activity	4	4.54545	0.00142729	EDN1, TH, ADIPOQ, IL10	88	43	16792	17.7505	0.956754	0.0225027	2.45234
GOTERM_BP_DIRECT	GO:0007268~chemical synaptic transmission	7	7.95455	0.00154098	OPRM1, MAPK1, GRIN2B, CRH, TAC1, CTNNB1, HTR2A	88	240	16792	5.56553	0.966333	0.0241021	2.64523
GOTERM_BP_DIRECT	GO:0032870~cellular response to hormone stimulus	4	4.54545	0.00162894	FOS, JUN, ADRA2A, STAT3	88	45	16792	16.9616	0.972262	0.0252818	2.79422
GOTERM_BP_DIRECT	GO:0030195~negative regulation of blood coagulation	3	3.40909	0.00169327	CD34, EDN1, SERPINE1	88	12	16792	47.7045	0.975927	0.0260839	2.90303
GOTERM_BP_DIRECT	GO:0019430~removal of superoxide radicals	3	3.40909	0.00169327	MPO, NOS3, NQO1	88	12	16792	47.7045	0.975927	0.0260839	2.90303
GOTERM_BP_DIRECT	GO:0009408~response to heat	4	4.54545	0.00196343	CALCA, AKT1, NOS1, NOS3	88	48	16792	15.9015	0.986724	0.0299769	3.3588
GOTERM_BP_DIRECT	GO:0001963~synaptic transmission, dopaminergic	3	3.40909	0.00199441	DRD2, TH, CRH	88	13	16792	44.035	0.9876	0.0302334	3.41093
GOTERM_BP_DIRECT	GO:0001878~response to yeast	3	3.40909	0.00199441	CALCA, TAC1, MPO	88	13	16792	44.035	0.9876	0.0302334	3.41093
GOTERM_BP_DIRECT	GO:0060391~positive regulation of SMAD protein import into nucleus	3	3.40909	0.00199441	SMAD4, PARP1, TGFB1	88	13	16792	44.035	0.9876	0.0302334	3.41093
GOTERM_BP_DIRECT	GO:0002576~platelet degranulation	5	5.68182	0.00201203	SERPINE1, CALM3, TGFB1, PLG, CALM1	88	103	16792	9.26302	0.988073	0.0302882	3.44058
GOTERM_BP_DIRECT	GO:0021762~substantia nigra development	4	4.54545	0.0020837	ACTB, CDC42, CALM3, CALM1	88	49	16792	15.577	0.989815	0.0311383	3.56106
GOTERM_BP_DIRECT	GO:0071560~cellular response to transforming growth factor beta stimulus	4	4.54545	0.0020837	CAV1, EDN1, CX3CR1, TGFB1	88	49	16792	15.577	0.989815	0.0311383	3.56106
GOTERM_BP_DIRECT	GO:0002223~stimulatory C-type lectin receptor signaling pathway	5	5.68182	0.00215843	RELA, PRKACA, NFKB1, PRKCD, SRC	88	105	16792	9.08658	0.991361	0.0320207	3.68651
GOTERM_BP_DIRECT	GO:0000187~activation of MAPK activity	5	5.68182	0.00231202	MAPK1, TNF, MAPK14, MAPK3, IL1B	88	107	16792	8.91674	0.993842	0.0340333	3.94389
GOTERM_BP_DIRECT	GO:0060065~uterus development	3	3.40909	0.00231899	SMAD4, ESR1, SRC	88	14	16792	40.8896	0.993936	0.0339076	3.95556
GOTERM_BP_DIRECT	GO:0043923~positive regulation by host of viral transcription	3	3.40909	0.00231899	SP1, JUN, SMARCA4	88	14	16792	40.8896	0.993936	0.0339076	3.95556
GOTERM_BP_DIRECT	GO:0019395~fatty acid oxidation	3	3.40909	0.00231899	MAPK14, PPARG, ADIPOQ	88	14	16792	40.8896	0.993936	0.0339076	3.95556
GOTERM_BP_DIRECT	GO:0019722~calcium-mediated signaling	4	4.54545	0.00233778	AGTR1, EDN1, CALM3, CALM1	88	51	16792	14.9661	0.994182	0.0339525	3.987
GOTERM_BP_DIRECT	GO:0042542~response to hydrogen peroxide	4	4.54545	0.00233778	CASP3, JUN, SIRT1, SRC	88	51	16792	14.9661	0.994182	0.0339525	3.987
GOTERM_BP_DIRECT	GO:0071356~cellular response to tumor necrosis factor	5	5.68182	0.00255629	CALCA, VCAM1, RELA, EDN1, SIRT1	88	110	16792	8.67355	0.996406	0.0368279	4.3519
GOTERM_BP_DIRECT	GO:0060397~JAK-STAT cascade involved in growth hormone signaling pathway	3	3.40909	0.00266676	MAPK1, MAPK3, STAT3	88	15	16792	38.1636	0.997183	0.0381413	4.5359
GOTERM_BP_DIRECT	GO:0051974~negative regulation of telomerase activity	3	3.40909	0.00266676	PPARG, TP53, SRC	88	15	16792	38.1636	0.997183	0.0381413	4.5359
GOTERM_BP_DIRECT	GO:0051044~positive regulation of membrane protein ectodomain proteolysis	3	3.40909	0.00266676	TNF, ADRA2A, IL1B	88	15	16792	38.1636	0.997183	0.0381413	4.5359
GOTERM_BP_DIRECT	GO:0030335~positive regulation of cell migration	6	6.81818	0.0026769	MAPK1, IGF1R, EDN1, ADRA2A, SMAD3, TGFB1	88	184	16792	6.22233	0.997245	0.0380366	4.55276
GOTERM_BP_DIRECT	GO:0048146~positive regulation of fibroblast proliferation	4	4.54545	0.00275355	AGT, JUN, ESR1, TGFB1	88	54	16792	14.1347	0.997674	0.0388551	4.6802
GOTERM_BP_DIRECT	GO:0001701~in utero embryonic development	6	6.81818	0.00287009	AR, EDN1, SMAD4, SMAD3, NOS3, CTNNB1	88	187	16792	6.12251	0.998201	0.0402107	4.87365
GOTERM_BP_DIRECT	GO:0050829~defense response to Gram-negative bacterium	4	4.54545	0.00290159	CALCA, SERPINE1, TAC1, NOS2	88	55	16792	13.8777	0.998322	0.0403868	4.92589
GOTERM_BP_DIRECT	GO:0010613~positive regulation of cardiac muscle hypertrophy	3	3.40909	0.0030375	AGT, EDN1, PARP1	88	16	16792	35.7784	0.998756	0.0419757	5.1509
GOTERM_BP_DIRECT	GO:0097194~execution phase of apoptosis	3	3.40909	0.0030375	AKT1, CASP3, CASP8	88	16	16792	35.7784	0.998756	0.0419757	5.1509
GOTERM_BP_DIRECT	GO:0044130~negative regulation of growth of symbiont in host	3	3.40909	0.0030375	TNF, MPO, IL10	88	16	16792	35.7784	0.998756	0.0419757	5.1509
GOTERM_BP_DIRECT	GO:0006940~regulation of smooth muscle contraction	3	3.40909	0.0030375	CAV1, ADRB2, ADRA2A	88	16	16792	35.7784	0.998756	0.0419757	5.1509
GOTERM_BP_DIRECT	GO:0050995~negative regulation of lipid catabolic process	3	3.40909	0.0030375	TNF, ADRA2A, IL1B	88	16	16792	35.7784	0.998756	0.0419757	5.1509
GOTERM_BP_DIRECT	GO:0048011~neurotrophin TRK receptor signaling pathway	3	3.40909	0.0030375	CASP3, NGFR, SRC	88	16	16792	35.7784	0.998756	0.0419757	5.1509
GOTERM_BP_DIRECT	GO:0070301~cellular response to hydrogen peroxide	4	4.54545	0.00321219	RELA, ANXA1, PRKCD, SIRT1	88	57	16792	13.3907	0.999154	0.0440632	5.4394
GOTERM_BP_DIRECT	GO:0032091~negative regulation of protein binding	4	4.54545	0.00321219	PPARA, ACE, CAV1, PRKCD	88	57	16792	13.3907	0.999154	0.0440632	5.4394
GOTERM_BP_DIRECT	GO:0032922~circadian regulation of gene expression	4	4.54545	0.00321219	PPARA, DRD2, NGFR, SIRT1	88	57	16792	13.3907	0.999154	0.0440632	5.4394
GOTERM_BP_DIRECT	GO:0042789~mRNA transcription from RNA polymerase II promoter	3	3.40909	0.00343094	SREBF1, HIF1A, STAT3	88	17	16792	33.6738	0.999478	0.046707	5.79949
GOTERM_BP_DIRECT	GO:0009416~response to light stimulus	3	3.40909	0.00343094	FOS, DRD2, TH	88	17	16792	33.6738	0.999478	0.046707	5.79949
GOTERM_BP_DIRECT	GO:2000811~negative regulation of anoikis	3	3.40909	0.00343094	CAV1, PIK3CA, SRC	88	17	16792	33.6738	0.999478	0.046707	5.79949
GOTERM_BP_DIRECT	GO:0048265~response to pain	3	3.40909	0.00343094	CALCA, CRH, TAC1	88	17	16792	33.6738	0.999478	0.046707	5.79949
GOTERM_BP_DIRECT	GO:0042310~vasoconstriction	3	3.40909	0.00343094	CAV1, AVP, EDN1	88	17	16792	33.6738	0.999478	0.046707	5.79949
GOTERM_BP_DIRECT	GO:0030224~monocyte differentiation	3	3.40909	0.00343094	CSF2, JUN, PPARG	88	17	16792	33.6738	0.999478	0.046707	5.79949
GOTERM_BP_DIRECT	GO:0050900~leukocyte migration	5	5.68182	0.00371102	CAV1, CD34, F2, PIK3CA, SRC	88	122	16792	7.82042	0.999719	0.05012	6.25866
GOTERM_BP_DIRECT	GO:0042102~positive regulation of T cell proliferation	4	4.54545	0.00371505	IL4, VCAM1, ANXA1, IL1B	88	60	16792	12.7212	0.999721	0.0498675	6.26526
GOTERM_BP_DIRECT	GO:0051726~regulation of cell cycle	5	5.68182	0.00393279	JUN, PTEN, SRC, ATM, STAT3	88	124	16792	7.69428	0.999828	0.0523988	6.62074
GOTERM_BP_DIRECT	GO:0043536~positive regulation of blood vessel endothelial cell migration	3	3.40909	0.004285	AKT1, MAPK14, TGFB1	88	19	16792	30.1292	0.999921	0.0566236	7.19307
GOTERM_BP_DIRECT	GO:0046827~positive regulation of protein export from nucleus	3	3.40909	0.004285	TP53, IL1B, PRKACA	88	19	16792	30.1292	0.999921	0.0566236	7.19307
GOTERM_BP_DIRECT	GO:0043011~myeloid dendritic cell differentiation	3	3.40909	0.004285	IL4, CSF2, TGFB1	88	19	16792	30.1292	0.999921	0.0566236	7.19307
GOTERM_BP_DIRECT	GO:0010881~regulation of cardiac muscle contraction by regulation of the release of sequestered calcium ion	3	3.40909	0.004285	CALM3, PRKACA, CALM1	88	19	16792	30.1292	0.999921	0.0566236	7.19307
GOTERM_BP_DIRECT	GO:0023019~signal transduction involved in regulation of gene expression	3	3.40909	0.004285	P2RY1, SMAD3, PARP1	88	19	16792	30.1292	0.999921	0.0566236	7.19307
GOTERM_BP_DIRECT	GO:0030512~negative regulation of transforming growth factor beta receptor signaling pathway	4	4.54545	0.00445652	CAV1, SMAD3, SIRT1, TGFB1	88	64	16792	11.9261	0.999946	0.0584769	7.47058
GOTERM_BP_DIRECT	GO:0017015~regulation of transforming growth factor beta receptor signaling pathway	3	3.40909	0.00474515	SMAD4, SMAD3, TGFB1	88	20	16792	28.6227	0.999971	0.0617857	7.93581
GOTERM_BP_DIRECT	GO:0035556~intracellular signal transduction	8	9.09091	0.00490163	AKT1, SGK1, DRD2, MAPK14, EDN1, SMAD4, PRKCD, SRC	88	403	16792	3.78795	0.99998	0.0633878	8.18711
GOTERM_BP_DIRECT	GO:0032868~response to insulin	4	4.54545	0.00506736	PPARA, RELA, SIRT1, IL10	88	67	16792	11.3921	0.999986	0.0650834	8.45257
GOTERM_BP_DIRECT	GO:0050796~regulation of insulin secretion	4	4.54545	0.00506736	TNF, ADRA2A, IL1B, NOS2	88	67	16792	11.3921	0.999986	0.0650834	8.45257
GOTERM_BP_DIRECT	GO:0030520~intracellular estrogen receptor signaling pathway	3	3.40909	0.00522706	ESR1, ESR2, SRC	88	21	16792	27.2597	0.99999	0.0666814	8.70767
GOTERM_BP_DIRECT	GO:0042730~fibrinolysis	3	3.40909	0.00522706	F2, SERPINE1, PLG	88	21	16792	27.2597	0.99999	0.0666814	8.70767
GOTERM_BP_DIRECT	GO:0042346~positive regulation of NF-kappaB import into nucleus	3	3.40909	0.00522706	TNF, PTGS2, IL1B	88	21	16792	27.2597	0.99999	0.0666814	8.70767
GOTERM_BP_DIRECT	GO:0007492~endoderm development	3	3.40909	0.00522706	SMAD4, SMAD3, TGFB1	88	21	16792	27.2597	0.99999	0.0666814	8.70767
GOTERM_BP_DIRECT	GO:0031954~positive regulation of protein autophosphorylation	3	3.40909	0.00522706	CALM3, SRC, CALM1	88	21	16792	27.2597	0.99999	0.0666814	8.70767
GOTERM_BP_DIRECT	GO:0006921~cellular component disassembly involved in execution phase of apoptosis	3	3.40909	0.00522706	CASP3, CASP8, PRKCD	88	21	16792	27.2597	0.99999	0.0666814	8.70767
GOTERM_BP_DIRECT	GO:0043154~negative regulation of cysteine-type endopeptidase activity involved in apoptotic process	4	4.54545	0.00550126	AKT1, AVP, NGFR, SRC	88	69	16792	11.0619	0.999995	0.0696611	9.14412
GOTERM_BP_DIRECT	GO:0001938~positive regulation of endothelial cell proliferation	4	4.54545	0.00550126	AKT1, HIF1A, JUN, SIRT1	88	69	16792	11.0619	0.999995	0.0696611	9.14412
GOTERM_BP_DIRECT	GO:0031647~regulation of protein stability	4	4.54545	0.00572632	SREBF1, CDC42, MAPK1, PTEN	88	70	16792	10.9039	0.999997	0.0720004	9.50089
GOTERM_BP_DIRECT	GO:0007265~Ras protein signal transduction	4	4.54545	0.00572632	MAPK14, JUN, ADRA2A, TP53	88	70	16792	10.9039	0.999997	0.0720004	9.50089
GOTERM_BP_DIRECT	GO:0045453~bone resorption	3	3.40909	0.0057305	ADRB2, SRC, CTNNB1	88	22	16792	26.0207	0.999997	0.071643	9.50751
GOTERM_BP_DIRECT	GO:0010165~response to X-ray	3	3.40909	0.0057305	CASP3, ANXA1, TP53	88	22	16792	26.0207	0.999997	0.071643	9.50751
GOTERM_BP_DIRECT	GO:0071347~cellular response to interleukin-1	4	4.54545	0.00595683	HIF1A, RELA, EDN1, NFKB1	88	71	16792	10.7503	0.999998	0.0739544	9.86493
GOTERM_BP_DIRECT	GO:0006955~immune response	8	9.09091	0.00619236	IL4, CSF2, IGF1R, TNF, SMAD3, IL1B, NGFR, IL10	88	421	16792	3.626	0.999999	0.0763432	10.2355
GOTERM_BP_DIRECT	GO:0007194~negative regulation of adenylate cyclase activity	3	3.40909	0.00625524	OPRM1, DRD2, ADRA2A	88	23	16792	24.8893	0.999999	0.0766621	10.3341
GOTERM_BP_DIRECT	GO:0043278~response to morphine	3	3.40909	0.00625524	DRD2, RELA, TAC1	88	23	16792	24.8893	0.999999	0.0766621	10.3341
GOTERM_BP_DIRECT	GO:0071398~cellular response to fatty acid	3	3.40909	0.00625524	SREBF1, EDN1, SRC	88	23	16792	24.8893	0.999999	0.0766621	10.3341
GOTERM_BP_DIRECT	GO:0030316~osteoclast differentiation	3	3.40909	0.00625524	TNF, MAPK14, CTNNB1	88	23	16792	24.8893	0.999999	0.0766621	10.3341
GOTERM_BP_DIRECT	GO:0035924~cellular response to vascular endothelial growth factor stimulus	3	3.40909	0.00625524	VCAM1, AKT1, MAPK14	88	23	16792	24.8893	0.999999	0.0766621	10.3341
GOTERM_BP_DIRECT	GO:0001889~liver development	4	4.54545	0.00668145	RELA, JUN, SMAD3, PIK3CA	88	74	16792	10.3145	1	0.0812333	11.0003
GOTERM_BP_DIRECT	GO:0051149~positive regulation of muscle cell differentiation	3	3.40909	0.00680105	CDC42, MAPK14, CTNNB1	88	24	16792	23.8523	1	0.0821782	11.1864
GOTERM_BP_DIRECT	GO:0008306~associative learning	3	3.40909	0.00680105	DRD2, CRH, TAC1	88	24	16792	23.8523	1	0.0821782	11.1864
GOTERM_BP_DIRECT	GO:0045671~negative regulation of osteoclast differentiation	3	3.40909	0.00680105	CALCA, IL4, CTNNB1	88	24	16792	23.8523	1	0.0821782	11.1864
GOTERM_BP_DIRECT	GO:0050482~arachidonic acid secretion	3	3.40909	0.00680105	ACE, DRD2, ANXA1	88	24	16792	23.8523	1	0.0821782	11.1864
GOTERM_BP_DIRECT	GO:0001819~positive regulation of cytokine production	3	3.40909	0.00680105	TNF, AGT, ADRA2A	88	24	16792	23.8523	1	0.0821782	11.1864
GOTERM_BP_DIRECT	GO:1900034~regulation of cellular response to heat	4	4.54545	0.00693412	MAPK1, MAPK3, SIRT1, ATM	88	75	16792	10.177	1	0.0832669	11.3931
GOTERM_BP_DIRECT	GO:0030324~lung development	4	4.54545	0.00719241	SREBF1, CRH, NOS3, SHH	88	76	16792	10.0431	1	0.0857758	11.7928
GOTERM_BP_DIRECT	GO:0050852~T cell receptor signaling pathway	5	5.68182	0.00732686	MAPK1, RELA, PIK3CA, NFKB1, PTEN	88	148	16792	6.44656	1	0.0868442	12.0003
GOTERM_BP_DIRECT	GO:0071158~positive regulation of cell cycle arrest	3	3.40909	0.00736771	TP53, PRKACA, TGFB1	88	25	16792	22.8982	1	0.0868424	12.0632
GOTERM_BP_DIRECT	GO:0050715~positive regulation of cytokine secretion	3	3.40909	0.00736771	TNF, IL10, SRC	88	25	16792	22.8982	1	0.0868424	12.0632
GOTERM_BP_DIRECT	GO:0014066~regulation of phosphatidylinositol 3-kinase signaling	4	4.54545	0.00772596	AKT1, MAPK1, MAPK3, PIK3CA	88	78	16792	9.78555	1	0.0904015	12.6133
GOTERM_BP_DIRECT	GO:0008286~insulin receptor signaling pathway	4	4.54545	0.00772596	AKT1, SREBF1, IGF1R, PIK3R3	88	78	16792	9.78555	1	0.0904015	12.6133
GOTERM_BP_DIRECT	GO:0045930~negative regulation of mitotic cell cycle	3	3.40909	0.00795498	SMAD3, TGFB1, IL10	88	26	16792	22.0175	1	0.0924739	12.9632
GOTERM_BP_DIRECT	GO:0007202~activation of phospholipase C activity	3	3.40909	0.00795498	AGT, PRKCD, HTR2A	88	26	16792	22.0175	1	0.0924739	12.9632
GOTERM_BP_DIRECT	GO:0042060~wound healing	4	4.54545	0.00828233	OPRM1, PPARA, CASP3, SMAD3	88	80	16792	9.54091	1	0.0956034	13.4611
GOTERM_BP_DIRECT	GO:0014065~phosphatidylinositol 3-kinase signaling	3	3.40909	0.00856265	IGF1R, EDN1, HTR2A	88	27	16792	21.202	1	0.0981754	13.8854
GOTERM_BP_DIRECT	GO:0031069~hair follicle morphogenesis	3	3.40909	0.00856265	CDC42, SHH, CTNNB1	88	27	16792	21.202	1	0.0981754	13.8854
GOTERM_BP_DIRECT	GO:0043410~positive regulation of MAPK cascade	4	4.54545	0.00856914	AR, ADRB2, NGFR, CTNNB1	88	81	16792	9.42312	1	0.0977394	13.8952
GOTERM_BP_DIRECT	GO:0001569~patterning of blood vessels	3	3.40909	0.00919049	EDN1, SHH, CTNNB1	88	28	16792	20.4448	1	0.10394	14.8284
GOTERM_BP_DIRECT	GO:2000352~negative regulation of endothelial cell apoptotic process	3	3.40909	0.00919049	IL4, SERPINE1, IL10	88	28	16792	20.4448	1	0.10394	14.8284
GOTERM_BP_DIRECT	GO:0007616~long-term memory	3	3.40909	0.00919049	SGK1, DRD2, TAC1	88	28	16792	20.4448	1	0.10394	14.8284
GOTERM_BP_DIRECT	GO:0000060~protein import into nucleus, translocation	3	3.40909	0.00919049	AKT1, TNF, TGFB1	88	28	16792	20.4448	1	0.10394	14.8284
GOTERM_BP_DIRECT	GO:0030307~positive regulation of cell growth	4	4.54545	0.00946436	AKT1, CDC42, AVP, F2	88	84	16792	9.08658	1	0.106337	15.2368
GOTERM_BP_DIRECT	GO:0050830~defense response to Gram-positive bacterium	4	4.54545	0.00977444	CALCA, TNF, CRP, TAC1	88	85	16792	8.97968	1	0.109085	15.6968
GOTERM_BP_DIRECT	GO:0043123~positive regulation of I-kappaB kinase/NF-kappaB signaling	5	5.68182	0.00978768	TNF, RELA, CASP8, ADIPOQ, CTNNB1	88	161	16792	5.92603	1	0.108677	15.7164
GOTERM_BP_DIRECT	GO:0051973~positive regulation of telomerase activity	3	3.40909	0.00983829	MAPK1, MAPK3, CTNNB1	88	29	16792	19.7398	1	0.108665	15.7913
GOTERM_BP_DIRECT	GO:0046627~negative regulation of insulin receptor signaling pathway	3	3.40909	0.00983829	RELA, IL1B, PRKCD	88	29	16792	19.7398	1	0.108665	15.7913
GOTERM_BP_DIRECT	GO:0001822~kidney development	4	4.54545	0.0100904	AGTR1, ACE, REN, AGT	88	86	16792	8.87526	1	0.110749	16.1632
GOTERM_BP_DIRECT	GO:0048013~ephrin receptor signaling pathway	4	4.54545	0.0100904	ACTB, CDC42, GRIN2B, SRC	88	86	16792	8.87526	1	0.110749	16.1632
GOTERM_BP_DIRECT	GO:0002019~regulation of renal output by angiotensin	2	2.27273	0.0103355	ACE, AGT	88	2	16792	190.818	1	0.112736	16.5234
GOTERM_BP_DIRECT	GO:0035411~catenin import into nucleus	2	2.27273	0.0103355	AGT, CTNNB1	88	2	16792	190.818	1	0.112736	16.5234
GOTERM_BP_DIRECT	GO:0003057~regulation of the force of heart contraction by chemical signal	2	2.27273	0.0103355	CAV1, NOS3	88	2	16792	190.818	1	0.112736	16.5234
GOTERM_BP_DIRECT	GO:0032943~mononuclear cell proliferation	2	2.27273	0.0103355	ACE, TGFB1	88	2	16792	190.818	1	0.112736	16.5234
GOTERM_BP_DIRECT	GO:1900168~positive regulation of glial cell-derived neurotrophic factor secretion	2	2.27273	0.0103355	CD34, DRD2	88	2	16792	190.818	1	0.112736	16.5234
GOTERM_BP_DIRECT	GO:0070101~positive regulation of chemokine-mediated signaling pathway	2	2.27273	0.0103355	HIF1A, EDN1	88	2	16792	190.818	1	0.112736	16.5234
GOTERM_BP_DIRECT	GO:0060769~positive regulation of epithelial cell proliferation involved in prostate gland development	2	2.27273	0.0103355	SHH, CTNNB1	88	2	16792	190.818	1	0.112736	16.5234
GOTERM_BP_DIRECT	GO:2000854~positive regulation of corticosterone secretion	2	2.27273	0.0103355	CRH, TAC1	88	2	16792	190.818	1	0.112736	16.5234
GOTERM_BP_DIRECT	GO:0019049~evasion or tolerance of host defenses by virus	2	2.27273	0.0103355	SMAD3, TGFB1	88	2	16792	190.818	1	0.112736	16.5234
GOTERM_BP_DIRECT	GO:0086098~angiotensin-activated signaling pathway involved in heart process	2	2.27273	0.0103355	CAV1, SRC	88	2	16792	190.818	1	0.112736	16.5234
GOTERM_BP_DIRECT	GO:0046326~positive regulation of glucose import	3	3.40909	0.0105058	AKT1, MAPK14, ADIPOQ	88	30	16792	19.0818	1	0.113931	16.7727
GOTERM_BP_DIRECT	GO:0043552~positive regulation of phosphatidylinositol 3-kinase activity	3	3.40909	0.0111929	CDC42, TGFB1, SRC	88	31	16792	18.4663	1	0.120365	17.7716
GOTERM_BP_DIRECT	GO:0043200~response to amino acid	3	3.40909	0.0111929	CASP3, RELA, EDN1	88	31	16792	18.4663	1	0.120365	17.7716
GOTERM_BP_DIRECT	GO:1990090~cellular response to nerve growth factor stimulus	3	3.40909	0.0111929	CALCA, AKT1, TAC1	88	31	16792	18.4663	1	0.120365	17.7716
GOTERM_BP_DIRECT	GO:0046676~negative regulation of insulin secretion	3	3.40909	0.0111929	SREBF1, DRD2, ADRA2A	88	31	16792	18.4663	1	0.120365	17.7716
GOTERM_BP_DIRECT	GO:0001974~blood vessel remodeling	3	3.40909	0.0118992	ACE, AGT, NOS3	88	32	16792	17.8892	1	0.126884	18.7867
GOTERM_BP_DIRECT	GO:0046677~response to antibiotic	3	3.40909	0.0118992	CASP3, CASP8, TP53	88	32	16792	17.8892	1	0.126884	18.7867
GOTERM_BP_DIRECT	GO:0042177~negative regulation of protein catabolic process	3	3.40909	0.0118992	RELA, SMAD3, NOS2	88	32	16792	17.8892	1	0.126884	18.7867
GOTERM_BP_DIRECT	GO:0046777~protein autophosphorylation	5	5.68182	0.0122464	AKT1, IGF1R, PRKACA, SRC, ATM	88	172	16792	5.54704	1	0.129732	19.2814
GOTERM_BP_DIRECT	GO:0070555~response to interleukin-1	3	3.40909	0.0126246	RELA, ANXA1, SRC	88	33	16792	17.3471	1	0.132849	19.817
GOTERM_BP_DIRECT	GO:1902042~negative regulation of extrinsic apoptotic signaling pathway via death domain receptors	3	3.40909	0.0126246	CASP8, SERPINE1, NOS3	88	33	16792	17.3471	1	0.132849	19.817
GOTERM_BP_DIRECT	GO:0001837~epithelial to mesenchymal transition	3	3.40909	0.0133689	HIF1A, TGFB1, CTNNB1	88	34	16792	16.8369	1	0.139496	20.8613
GOTERM_BP_DIRECT	GO:0097192~extrinsic apoptotic signaling pathway in absence of ligand	3	3.40909	0.0133689	IL4, CASP3, IL1B	88	34	16792	16.8369	1	0.139496	20.8613
GOTERM_BP_DIRECT	GO:0071902~positive regulation of protein serine/threonine kinase activity	3	3.40909	0.0141319	CALM3, SRC, CALM1	88	35	16792	16.3558	1	0.14621	21.9184
GOTERM_BP_DIRECT	GO:0030501~positive regulation of bone mineralization	3	3.40909	0.0141319	ADRB2, SMAD3, TGFB1	88	35	16792	16.3558	1	0.14621	21.9184
GOTERM_BP_DIRECT	GO:0048469~cell maturation	3	3.40909	0.0149133	REN, PPARG, CTNNB1	88	36	16792	15.9015	1	0.152985	22.9873
GOTERM_BP_DIRECT	GO:0010043~response to zinc ion	3	3.40909	0.0149133	VCAM1, TH, PTEN	88	36	16792	15.9015	1	0.152985	22.9873
GOTERM_BP_DIRECT	GO:0043407~negative regulation of MAP kinase activity	3	3.40909	0.0149133	IL1B, PRKCD, ADIPOQ	88	36	16792	15.9015	1	0.152985	22.9873
GOTERM_BP_DIRECT	GO:0010468~regulation of gene expression	4	4.54545	0.015141	HIF1A, F2, PIK3CA, IL10	88	100	16792	7.63273	1	0.154434	23.2962
GOTERM_BP_DIRECT	GO:0016310~phosphorylation	4	4.54545	0.015141	AKT1, MAPK3, PIK3CA, STAT3	88	100	16792	7.63273	1	0.154434	23.2962
GOTERM_BP_DIRECT	GO:0007596~blood coagulation	5	5.68182	0.0153457	CDC42, F2, PRKACA, PLG, SHH	88	184	16792	5.18528	1	0.15565	23.5729
GOTERM_BP_DIRECT	GO:0060559~positive regulation of calcidiol 1-monooxygenase activity	2	2.27273	0.0154636	TNF, IL1B	88	3	16792	127.212	1	0.156044	23.7318
GOTERM_BP_DIRECT	GO:1903598~positive regulation of gap junction assembly	2	2.27273	0.0154636	CAV1, AGT	88	3	16792	127.212	1	0.156044	23.7318
GOTERM_BP_DIRECT	GO:0061308~cardiac neural crest cell development involved in heart development	2	2.27273	0.0154636	MAPK1, MAPK3	88	3	16792	127.212	1	0.156044	23.7318
GOTERM_BP_DIRECT	GO:0060745~mammary gland branching involved in pregnancy	2	2.27273	0.0154636	VDR, ESR1	88	3	16792	127.212	1	0.156044	23.7318
GOTERM_BP_DIRECT	GO:0000189~MAPK import into nucleus	2	2.27273	0.0154636	MAPK1, MAPK3	88	3	16792	127.212	1	0.156044	23.7318
GOTERM_BP_DIRECT	GO:0060916~mesenchymal cell proliferation involved in lung development	2	2.27273	0.0154636	SHH, CTNNB1	88	3	16792	127.212	1	0.156044	23.7318
GOTERM_BP_DIRECT	GO:0031649~heat generation	2	2.27273	0.0154636	ADRB2, ADRB1	88	3	16792	127.212	1	0.156044	23.7318
GOTERM_BP_DIRECT	GO:0010871~negative regulation of receptor biosynthetic process	2	2.27273	0.0154636	PPARA, PPARG	88	3	16792	127.212	1	0.156044	23.7318
GOTERM_BP_DIRECT	GO:0051097~negative regulation of helicase activity	2	2.27273	0.0154636	TP53, SIRT1	88	3	16792	127.212	1	0.156044	23.7318
GOTERM_BP_DIRECT	GO:0002025~vasodilation by norepinephrine-epinephrine involved in regulation of systemic arterial blood pressure	2	2.27273	0.0154636	ADRB2, ADRB1	88	3	16792	127.212	1	0.156044	23.7318
GOTERM_BP_DIRECT	GO:0060523~prostate epithelial cord elongation	2	2.27273	0.0154636	ESR1, SHH	88	3	16792	127.212	1	0.156044	23.7318
GOTERM_BP_DIRECT	GO:2000630~positive regulation of miRNA metabolic process	2	2.27273	0.0154636	RELA, NFKB1	88	3	16792	127.212	1	0.156044	23.7318
GOTERM_BP_DIRECT	GO:0002034~regulation of blood vessel size by renin-angiotensin	2	2.27273	0.0154636	AGTR1, AGT	88	3	16792	127.212	1	0.156044	23.7318
GOTERM_BP_DIRECT	GO:0014854~response to inactivity	2	2.27273	0.0154636	DRD2, IL10	88	3	16792	127.212	1	0.156044	23.7318
GOTERM_BP_DIRECT	GO:0001976~neurological system process involved in regulation of systemic arterial blood pressure	2	2.27273	0.0154636	CALCA, DRD2	88	3	16792	127.212	1	0.156044	23.7318
GOTERM_BP_DIRECT	GO:0030801~positive regulation of cyclic nucleotide metabolic process	2	2.27273	0.0154636	CALM3, CALM1	88	3	16792	127.212	1	0.156044	23.7318
GOTERM_BP_DIRECT	GO:0031281~positive regulation of cyclase activity	2	2.27273	0.0154636	MAPK14, MAPK3	88	3	16792	127.212	1	0.156044	23.7318
GOTERM_BP_DIRECT	GO:0032800~receptor biosynthetic process	2	2.27273	0.0154636	TNF, IL10	88	3	16792	127.212	1	0.156044	23.7318
GOTERM_BP_DIRECT	GO:0016337~single organismal cell-cell adhesion	4	4.54545	0.0155472	VCAM1, CD34, SRC, CTNNB1	88	101	16792	7.55716	1	0.156114	23.8443
GOTERM_BP_DIRECT	GO:0042130~negative regulation of T cell proliferation	3	3.40909	0.015713	TGFB1, IL10, SHH	88	37	16792	15.4717	1	0.156944	24.0669
GOTERM_BP_DIRECT	GO:0051898~negative regulation of protein kinase B signaling	3	3.40909	0.015713	DRD2, PTEN, SIRT1	88	37	16792	15.4717	1	0.156944	24.0669
GOTERM_BP_DIRECT	GO:0060291~long-term synaptic potentiation	3	3.40909	0.0165307	MAPK1, CRH, PTEN	88	38	16792	15.0646	1	0.163731	25.1561
GOTERM_BP_DIRECT	GO:0030522~intracellular receptor signaling pathway	3	3.40909	0.0165307	PPARA, AR, STAT3	88	38	16792	15.0646	1	0.163731	25.1561
GOTERM_BP_DIRECT	GO:0032720~negative regulation of tumor necrosis factor production	3	3.40909	0.0165307	CD34, ADIPOQ, IL10	88	38	16792	15.0646	1	0.163731	25.1561
GOTERM_BP_DIRECT	GO:0038128~ERBB2 signaling pathway	3	3.40909	0.0165307	AKT1, PIK3CA, SRC	88	38	16792	15.0646	1	0.163731	25.1561
GOTERM_BP_DIRECT	GO:0007223~Wnt signaling pathway, calcium modulating pathway	3	3.40909	0.0173663	CALM3, CTNNB1, CALM1	88	39	16792	14.6783	1	0.170564	26.2538
GOTERM_BP_DIRECT	GO:0006953~acute-phase response	3	3.40909	0.0173663	F2, CRP, STAT3	88	39	16792	14.6783	1	0.170564	26.2538
GOTERM_BP_DIRECT	GO:0007186~G-protein coupled receptor signaling pathway	11	12.5	0.0176584	AKT1, AGTR1, AGT, CHRM1, EDN1, P2RY1, PPARG, CX3CR1, ADRA2A, CALM3, CALM1	88	899	16792	2.33482	1	0.172433	26.634
GOTERM_BP_DIRECT	GO:0048015~phosphatidylinositol-mediated signaling	4	4.54545	0.0176701	AKT1, IGF1R, PIK3CA, PTEN	88	106	16792	7.20069	1	0.171783	26.6491
GOTERM_BP_DIRECT	GO:0038083~peptidyl-tyrosine autophosphorylation	3	3.40909	0.0182195	IGF1R, MAPK3, SRC	88	40	16792	14.3114	1	0.175901	27.3591
GOTERM_BP_DIRECT	GO:0006979~response to oxidative stress	4	4.54545	0.0194792	AKT1, PTGS2, MPO, SIRT1	88	110	16792	6.93884	1	0.186157	28.9623
GOTERM_BP_DIRECT	GO:0007595~lactation	3	3.40909	0.019978	VDR, CAV1, HIF1A	88	42	16792	13.6299	1	0.189671	29.588
GOTERM_BP_DIRECT	GO:0007566~embryo implantation	3	3.40909	0.019978	CALCA, PTGS2, IL1B	88	42	16792	13.6299	1	0.189671	29.588
GOTERM_BP_DIRECT	GO:0001658~branching involved in ureteric bud morphogenesis	3	3.40909	0.019978	SMAD4, SHH, CTNNB1	88	42	16792	13.6299	1	0.189671	29.588
GOTERM_BP_DIRECT	GO:0002248~connective tissue replacement involved in inflammatory response wound healing	2	2.27273	0.0205655	HIF1A, TGFB1	88	4	16792	95.4091	1	0.193896	30.3181
GOTERM_BP_DIRECT	GO:0032079~positive regulation of endodeoxyribonuclease activity	2	2.27273	0.0205655	AKT1, PRKCD	88	4	16792	95.4091	1	0.193896	30.3181
GOTERM_BP_DIRECT	GO:0010523~negative regulation of calcium ion transport into cytosol	2	2.27273	0.0205655	CALCA, NOS1	88	4	16792	95.4091	1	0.193896	30.3181
GOTERM_BP_DIRECT	GO:0001821~histamine secretion	2	2.27273	0.0205655	CSF2, EDN1	88	4	16792	95.4091	1	0.193896	30.3181
GOTERM_BP_DIRECT	GO:0018119~peptidyl-cysteine S-nitrosylation	2	2.27273	0.0205655	NOS1, NOS2	88	4	16792	95.4091	1	0.193896	30.3181
GOTERM_BP_DIRECT	GO:0048859~formation of anatomical boundary	2	2.27273	0.0205655	SMAD4, SHH	88	4	16792	95.4091	1	0.193896	30.3181
GOTERM_BP_DIRECT	GO:0045191~regulation of isotype switching	2	2.27273	0.0205655	IL4, IL10	88	4	16792	95.4091	1	0.193896	30.3181
GOTERM_BP_DIRECT	GO:2000481~positive regulation of cAMP-dependent protein kinase activity	2	2.27273	0.0205655	ADIPOQ, SIRT1	88	4	16792	95.4091	1	0.193896	30.3181
GOTERM_BP_DIRECT	GO:0060355~positive regulation of cell adhesion molecule production	2	2.27273	0.0205655	CAV1, IL1B	88	4	16792	95.4091	1	0.193896	30.3181
GOTERM_BP_DIRECT	GO:0090400~stress-induced premature senescence	2	2.27273	0.0205655	MAPK14, SIRT1	88	4	16792	95.4091	1	0.193896	30.3181
GOTERM_BP_DIRECT	GO:0070849~response to epidermal growth factor	2	2.27273	0.0205655	MAPK1, MAPK3	88	4	16792	95.4091	1	0.193896	30.3181
GOTERM_BP_DIRECT	GO:0032811~negative regulation of epinephrine secretion	2	2.27273	0.0205655	ADRA2A, CRH	88	4	16792	95.4091	1	0.193896	30.3181
GOTERM_BP_DIRECT	GO:0060742~epithelial cell differentiation involved in prostate gland development	2	2.27273	0.0205655	AR, CTNNB1	88	4	16792	95.4091	1	0.193896	30.3181
GOTERM_BP_DIRECT	GO:1900015~regulation of cytokine production involved in inflammatory response	2	2.27273	0.0205655	MAPK14, NOS2	88	4	16792	95.4091	1	0.193896	30.3181
GOTERM_BP_DIRECT	GO:0032269~negative regulation of cellular protein metabolic process	2	2.27273	0.0205655	EDN1, NFKB1	88	4	16792	95.4091	1	0.193896	30.3181
GOTERM_BP_DIRECT	GO:1901203~positive regulation of extracellular matrix assembly	2	2.27273	0.0205655	SMAD3, TGFB1	88	4	16792	95.4091	1	0.193896	30.3181
GOTERM_BP_DIRECT	GO:0045472~response to ether	2	2.27273	0.0205655	TH, CRH	88	4	16792	95.4091	1	0.193896	30.3181
GOTERM_BP_DIRECT	GO:0030730~sequestering of triglyceride	2	2.27273	0.0205655	TNF, IL1B	88	4	16792	95.4091	1	0.193896	30.3181
GOTERM_BP_DIRECT	GO:0033864~positive regulation of NAD(P)H oxidase activity	2	2.27273	0.0205655	AGTR1, AGT	88	4	16792	95.4091	1	0.193896	30.3181
GOTERM_BP_DIRECT	GO:0090170~regulation of Golgi inheritance	2	2.27273	0.0205655	MAPK1, MAPK3	88	4	16792	95.4091	1	0.193896	30.3181
GOTERM_BP_DIRECT	GO:0034613~cellular protein localization	3	3.40909	0.0208829	CDC42, TP53, CTNNB1	88	43	16792	13.3129	1	0.195776	30.7097
GOTERM_BP_DIRECT	GO:0006351~transcription, DNA-templated	18	20.4545	0.0217073	AR, PPARG, NR3C2, TP53, SMAD4, ESR1, SMAD3, NR3C1, ESR2, SIRT1, STAT3, CTNNB1, VDR, MAPK1, HIF1A, MAPK14, MAPK3, SMARCA4	88	1955	16792	1.75689	1	0.201894	31.7168
GOTERM_BP_DIRECT	GO:0071363~cellular response to growth factor stimulus	3	3.40909	0.0227431	NOS1, TH, CTNNB1	88	45	16792	12.7212	1	0.209666	32.9628
GOTERM_BP_DIRECT	GO:0045600~positive regulation of fat cell differentiation	3	3.40909	0.0246691	AKT1, PPARG, HTR2A	88	47	16792	12.1799	1	0.224537	35.2228
GOTERM_BP_DIRECT	GO:0009267~cellular response to starvation	3	3.40909	0.0246691	SREBF1, CAV1, SIRT1	88	47	16792	12.1799	1	0.224537	35.2228
GOTERM_BP_DIRECT	GO:0008630~intrinsic apoptotic signaling pathway in response to DNA damage	3	3.40909	0.0246691	TNF, SIRT1, ATM	88	47	16792	12.1799	1	0.224537	35.2228
GOTERM_BP_DIRECT	GO:0051781~positive regulation of cell division	3	3.40909	0.0246691	IL1B, TGFB1, SHH	88	47	16792	12.1799	1	0.224537	35.2228
GOTERM_BP_DIRECT	GO:0043647~inositol phosphate metabolic process	3	3.40909	0.0246691	CALM3, PTEN, CALM1	88	47	16792	12.1799	1	0.224537	35.2228
GOTERM_BP_DIRECT	GO:0006935~chemotaxis	4	4.54545	0.0255002	IL4, MAPK1, MAPK14, CX3CR1	88	122	16792	6.25633	1	0.230306	36.1757
GOTERM_BP_DIRECT	GO:0019217~regulation of fatty acid metabolic process	2	2.27273	0.0256412	SREBF1, CAV1	88	5	16792	76.3273	1	0.230505	36.336
GOTERM_BP_DIRECT	GO:0042092~type 2 immune response	2	2.27273	0.0256412	IL4, IL10	88	5	16792	76.3273	1	0.230505	36.336
GOTERM_BP_DIRECT	GO:0099565~chemical synaptic transmission, postsynaptic	2	2.27273	0.0256412	AKT1, DRD2	88	5	16792	76.3273	1	0.230505	36.336
GOTERM_BP_DIRECT	GO:0010891~negative regulation of sequestering of triglyceride	2	2.27273	0.0256412	PPARA, PPARG	88	5	16792	76.3273	1	0.230505	36.336
GOTERM_BP_DIRECT	GO:0051343~positive regulation of cyclic-nucleotide phosphodiesterase activity	2	2.27273	0.0256412	CALM3, CALM1	88	5	16792	76.3273	1	0.230505	36.336
GOTERM_BP_DIRECT	GO:0043270~positive regulation of ion transport	2	2.27273	0.0256412	CHRM1, P2RY1	88	5	16792	76.3273	1	0.230505	36.336
GOTERM_BP_DIRECT	GO:0048645~organ formation	2	2.27273	0.0256412	AR, SHH	88	5	16792	76.3273	1	0.230505	36.336
GOTERM_BP_DIRECT	GO:0003100~regulation of systemic arterial blood pressure by endothelin	2	2.27273	0.0256412	EDN1, NOS3	88	5	16792	76.3273	1	0.230505	36.336
GOTERM_BP_DIRECT	GO:0016202~regulation of striated muscle tissue development	2	2.27273	0.0256412	SMAD3, TGFB1	88	5	16792	76.3273	1	0.230505	36.336
GOTERM_BP_DIRECT	GO:0046883~regulation of hormone secretion	2	2.27273	0.0256412	ANXA1, HTR2A	88	5	16792	76.3273	1	0.230505	36.336
GOTERM_BP_DIRECT	GO:0035176~social behavior	3	3.40909	0.0256563	AVP, TH, PTEN	88	48	16792	11.9261	1	0.229703	36.3531
GOTERM_BP_DIRECT	GO:0007049~cell cycle	5	5.68182	0.0262684	MAPK1, MAPK3, TP53, PRKCD, SRC	88	217	16792	4.39673	1	0.233618	37.0446
GOTERM_BP_DIRECT	GO:1901796~regulation of signal transduction by p53 class mediator	4	4.54545	0.0265904	AKT1, MAPK14, TP53, ATM	88	124	16792	6.15543	1	0.235216	37.4055
GOTERM_BP_DIRECT	GO:0036092~phosphatidylinositol-3-phosphate biosynthetic process	3	3.40909	0.0266594	PIK3CA, PIK3R3, ATM	88	49	16792	11.6827	1	0.234829	37.4826
GOTERM_BP_DIRECT	GO:0006357~regulation of transcription from RNA polymerase II promoter	7	7.95455	0.026918	SREBF1, FOS, MAPK14, SMAD3, NFKB1, STAT3, SMARCA4	88	441	16792	3.02886	1	0.235915	37.7708
GOTERM_BP_DIRECT	GO:0045596~negative regulation of cell differentiation	3	3.40909	0.0287125	MAPK1, TGFB1, SHH	88	51	16792	11.2246	1	0.248734	39.7358
GOTERM_BP_DIRECT	GO:0032481~positive regulation of type I interferon production	3	3.40909	0.0287125	RELA, NFKB1, CTNNB1	88	51	16792	11.2246	1	0.248734	39.7358
GOTERM_BP_DIRECT	GO:0071277~cellular response to calcium ion	3	3.40909	0.0287125	FOS, JUN, EDN1	88	51	16792	11.2246	1	0.248734	39.7358
GOTERM_BP_DIRECT	GO:0034097~response to cytokine	3	3.40909	0.0297621	IL4, FOS, JUN	88	52	16792	11.0087	1	0.255685	40.8579
GOTERM_BP_DIRECT	GO:0071333~cellular response to glucose stimulus	3	3.40909	0.0297621	TH, PIK3CA, PRKACA	88	52	16792	11.0087	1	0.255685	40.8579
GOTERM_BP_DIRECT	GO:0051346~negative regulation of hydrolase activity	2	2.27273	0.0306909	NOS1, NOS3	88	6	16792	63.6061	1	0.261625	41.8344
GOTERM_BP_DIRECT	GO:0002740~negative regulation of cytokine secretion involved in immune response	2	2.27273	0.0306909	TNF, IL10	88	6	16792	63.6061	1	0.261625	41.8344
GOTERM_BP_DIRECT	GO:0042045~epithelial fluid transport	2	2.27273	0.0306909	CSF2, EDN1	88	6	16792	63.6061	1	0.261625	41.8344
GOTERM_BP_DIRECT	GO:0032025~response to cobalt ion	2	2.27273	0.0306909	CASP3, CASP8	88	6	16792	63.6061	1	0.261625	41.8344
GOTERM_BP_DIRECT	GO:0090336~positive regulation of brown fat cell differentiation	2	2.27273	0.0306909	PTGS2, MAPK14	88	6	16792	63.6061	1	0.261625	41.8344
GOTERM_BP_DIRECT	GO:0060789~hair follicle placode formation	2	2.27273	0.0306909	CDC42, CTNNB1	88	6	16792	63.6061	1	0.261625	41.8344
GOTERM_BP_DIRECT	GO:0060664~epithelial cell proliferation involved in salivary gland morphogenesis	2	2.27273	0.0306909	TNF, SHH	88	6	16792	63.6061	1	0.261625	41.8344
GOTERM_BP_DIRECT	GO:0033210~leptin-mediated signaling pathway	2	2.27273	0.0306909	SIRT1, STAT3	88	6	16792	63.6061	1	0.261625	41.8344
GOTERM_BP_DIRECT	GO:0010742~macrophage derived foam cell differentiation	2	2.27273	0.0306909	PPARG, TGFB1	88	6	16792	63.6061	1	0.261625	41.8344
GOTERM_BP_DIRECT	GO:0010887~negative regulation of cholesterol storage	2	2.27273	0.0306909	PPARA, PPARG	88	6	16792	63.6061	1	0.261625	41.8344
GOTERM_BP_DIRECT	GO:0046321~positive regulation of fatty acid oxidation	2	2.27273	0.0306909	PPARA, PPARG	88	6	16792	63.6061	1	0.261625	41.8344
GOTERM_BP_DIRECT	GO:2001054~negative regulation of mesenchymal cell apoptotic process	2	2.27273	0.0306909	HIF1A, SHH	88	6	16792	63.6061	1	0.261625	41.8344
GOTERM_BP_DIRECT	GO:1903799~negative regulation of production of miRNAs involved in gene silencing by miRNA	2	2.27273	0.0306909	ESR1, TGFB1	88	6	16792	63.6061	1	0.261625	41.8344
GOTERM_BP_DIRECT	GO:0071636~positive regulation of transforming growth factor beta production	2	2.27273	0.0306909	PTGS2, CD34	88	6	16792	63.6061	1	0.261625	41.8344
GOTERM_BP_DIRECT	GO:0055114~oxidation-reduction process	8	9.09091	0.0338103	VCAM1, NOS1, PTGS2, TH, MPO, NOS3, NOS2, NQO1	88	592	16792	2.57862	1	0.283368	45.004
GOTERM_BP_DIRECT	GO:0050680~negative regulation of epithelial cell proliferation	3	3.40909	0.0341103	AR, PTEN, TGFB1	88	56	16792	10.2224	1	0.284466	45.3001
GOTERM_BP_DIRECT	GO:0016049~cell growth	3	3.40909	0.0341103	AR, EDN1, TGFB1	88	56	16792	10.2224	1	0.284466	45.3001
GOTERM_BP_DIRECT	GO:0042733~embryonic digit morphogenesis	3	3.40909	0.0341103	SMAD4, SHH, CTNNB1	88	56	16792	10.2224	1	0.284466	45.3001
GOTERM_BP_DIRECT	GO:1903779~regulation of cardiac conduction	3	3.40909	0.0341103	NOS1, AGT, PRKACA	88	56	16792	10.2224	1	0.284466	45.3001
GOTERM_BP_DIRECT	GO:0001570~vasculogenesis	3	3.40909	0.0341103	CAV1, TGFB1, SHH	88	56	16792	10.2224	1	0.284466	45.3001
GOTERM_BP_DIRECT	GO:0007173~epidermal growth factor receptor signaling pathway	3	3.40909	0.0341103	PIK3CA, TGFB1, SRC	88	56	16792	10.2224	1	0.284466	45.3001
GOTERM_BP_DIRECT	GO:0000086~G2/M transition of mitotic cell cycle	4	4.54545	0.0342768	CALM3, PRKACA, ABCB1, CALM1	88	137	16792	5.57133	1	0.284605	45.4639
GOTERM_BP_DIRECT	GO:0007612~learning	3	3.40909	0.0352338	PTGS2, JUN, TH	88	57	16792	10.0431	1	0.290322	46.3958
GOTERM_BP_DIRECT	GO:0007270~neuron-neuron synaptic transmission	2	2.27273	0.0357147	DRD2, PTEN	88	7	16792	54.5195	1	0.292633	46.8583
GOTERM_BP_DIRECT	GO:0071639~positive regulation of monocyte chemotactic protein-1 production	2	2.27273	0.0357147	IL1B, ADIPOQ	88	7	16792	54.5195	1	0.292633	46.8583
GOTERM_BP_DIRECT	GO:2000144~positive regulation of DNA-templated transcription, initiation	2	2.27273	0.0357147	JUN, CTNNB1	88	7	16792	54.5195	1	0.292633	46.8583
GOTERM_BP_DIRECT	GO:1903140~regulation of establishment of endothelial barrier	2	2.27273	0.0357147	TNF, IL1B	88	7	16792	54.5195	1	0.292633	46.8583
GOTERM_BP_DIRECT	GO:0071455~cellular response to hyperoxia	2	2.27273	0.0357147	CAV1, PPARG	88	7	16792	54.5195	1	0.292633	46.8583
GOTERM_BP_DIRECT	GO:0060290~transdifferentiation	2	2.27273	0.0357147	CD34, SMAD3	88	7	16792	54.5195	1	0.292633	46.8583
GOTERM_BP_DIRECT	GO:0043457~regulation of cellular respiration	2	2.27273	0.0357147	PIK3CA, NOS2	88	7	16792	54.5195	1	0.292633	46.8583
GOTERM_BP_DIRECT	GO:0032308~positive regulation of prostaglandin secretion	2	2.27273	0.0357147	EDN1, IL1B	88	7	16792	54.5195	1	0.292633	46.8583
GOTERM_BP_DIRECT	GO:0001542~ovulation from ovarian follicle	2	2.27273	0.0357147	NOS3, SIRT1	88	7	16792	54.5195	1	0.292633	46.8583
GOTERM_BP_DIRECT	GO:1901841~regulation of high voltage-gated calcium channel activity	2	2.27273	0.0357147	CALM3, CALM1	88	7	16792	54.5195	1	0.292633	46.8583
GOTERM_BP_DIRECT	GO:0010870~positive regulation of receptor biosynthetic process	2	2.27273	0.0357147	HIF1A, EDN1	88	7	16792	54.5195	1	0.292633	46.8583
GOTERM_BP_DIRECT	GO:0006661~phosphatidylinositol biosynthetic process	3	3.40909	0.0363717	PIK3CA, PIK3R3, PTEN	88	58	16792	9.86991	1	0.296138	47.4842
GOTERM_BP_DIRECT	GO:0070373~negative regulation of ERK1 and ERK2 cascade	3	3.40909	0.0363717	SMAD4, PTEN, ADIPOQ	88	58	16792	9.86991	1	0.296138	47.4842
GOTERM_BP_DIRECT	GO:0051592~response to calcium ion	3	3.40909	0.0363717	CAV1, CALM3, CALM1	88	58	16792	9.86991	1	0.296138	47.4842
GOTERM_BP_DIRECT	GO:0007050~cell cycle arrest	4	4.54545	0.0368498	TP53, SMAD3, TGFB1, ATM	88	141	16792	5.41328	1	0.29837	47.9353
GOTERM_BP_DIRECT	GO:0051216~cartilage development	3	3.40909	0.0375236	HIF1A, MAPK3, EDN1	88	59	16792	9.70262	1	0.301913	48.5649
GOTERM_BP_DIRECT	GO:0042742~defense response to bacterium	4	4.54545	0.0395195	MPO, NOS2, PRKCD, IL10	88	145	16792	5.26395	1	0.314294	50.3879
GOTERM_BP_DIRECT	GO:0008104~protein localization	3	3.40909	0.0398689	CAV1, DRD2, TP53	88	61	16792	9.3845	1	0.315522	50.7007
GOTERM_BP_DIRECT	GO:0001947~heart looping	3	3.40909	0.0398689	HIF1A, SMAD3, SHH	88	61	16792	9.3845	1	0.315522	50.7007
GOTERM_BP_DIRECT	GO:0007416~synapse assembly	3	3.40909	0.0398689	BDNF, DRD2, PTEN	88	61	16792	9.3845	1	0.315522	50.7007
GOTERM_BP_DIRECT	GO:0002674~negative regulation of acute inflammatory response	2	2.27273	0.0407128	IL4, PPARG	88	8	16792	47.7045	1	0.319997	51.4485
GOTERM_BP_DIRECT	GO:0060736~prostate gland growth	2	2.27273	0.0407128	AR, PTEN	88	8	16792	47.7045	1	0.319997	51.4485
GOTERM_BP_DIRECT	GO:0072089~stem cell proliferation	2	2.27273	0.0407128	CD34, ABCB1	88	8	16792	47.7045	1	0.319997	51.4485
GOTERM_BP_DIRECT	GO:0032872~regulation of stress-activated MAPK cascade	2	2.27273	0.0407128	MAPK1, MAPK3	88	8	16792	47.7045	1	0.319997	51.4485
GOTERM_BP_DIRECT	GO:0097011~cellular response to granulocyte macrophage colony-stimulating factor stimulus	2	2.27273	0.0407128	AKT1, MAPK1	88	8	16792	47.7045	1	0.319997	51.4485
GOTERM_BP_DIRECT	GO:0034115~negative regulation of heterotypic cell-cell adhesion	2	2.27273	0.0407128	ADIPOQ, IL10	88	8	16792	47.7045	1	0.319997	51.4485
GOTERM_BP_DIRECT	GO:0071550~death-inducing signaling complex assembly	2	2.27273	0.0407128	TNF, CASP8	88	8	16792	47.7045	1	0.319997	51.4485
GOTERM_BP_DIRECT	GO:0046887~positive regulation of hormone secretion	2	2.27273	0.0407128	EDN1, P2RY1	88	8	16792	47.7045	1	0.319997	51.4485
GOTERM_BP_DIRECT	GO:0010888~negative regulation of lipid storage	2	2.27273	0.0407128	TNF, CRP	88	8	16792	47.7045	1	0.319997	51.4485
GOTERM_BP_DIRECT	GO:0010544~negative regulation of platelet activation	2	2.27273	0.0407128	F2, NOS3	88	8	16792	47.7045	1	0.319997	51.4485
GOTERM_BP_DIRECT	GO:0006975~DNA damage induced protein phosphorylation	2	2.27273	0.0407128	MAPK3, ATM	88	8	16792	47.7045	1	0.319997	51.4485
GOTERM_BP_DIRECT	GO:0006968~cellular defense response	3	3.40909	0.041062	IL4, RELA, CX3CR1	88	62	16792	9.23314	1	0.321182	51.7549
GOTERM_BP_DIRECT	GO:0072659~protein localization to plasma membrane	3	3.40909	0.0422686	TNF, P2RY1, ADIPOQ	88	63	16792	9.08658	1	0.327911	52.7993
GOTERM_BP_DIRECT	GO:0009611~response to wounding	3	3.40909	0.0422686	F2, CX3CR1, TGFB1	88	63	16792	9.08658	1	0.327911	52.7993
GOTERM_BP_DIRECT	GO:0014068~positive regulation of phosphatidylinositol 3-kinase signaling	3	3.40909	0.0447211	AGT, F2, SIRT1	88	65	16792	8.80699	1	0.342429	54.857
GOTERM_BP_DIRECT	GO:0060326~cell chemotaxis	3	3.40909	0.0447211	VCAM1, AGTR1, PRKCD	88	65	16792	8.80699	1	0.342429	54.857
GOTERM_BP_DIRECT	GO:0046330~positive regulation of JNK cascade	3	3.40909	0.0447211	CDC42, TNF, IL1B	88	65	16792	8.80699	1	0.342429	54.857
GOTERM_BP_DIRECT	GO:0070102~interleukin-6-mediated signaling pathway	2	2.27273	0.0456852	SMAD4, STAT3	88	9	16792	42.404	1	0.347325	55.6425
GOTERM_BP_DIRECT	GO:0042473~outer ear morphogenesis	2	2.27273	0.0456852	MAPK1, MAPK3	88	9	16792	42.404	1	0.347325	55.6425
GOTERM_BP_DIRECT	GO:0051967~negative regulation of synaptic transmission, glutamatergic	2	2.27273	0.0456852	DRD2, HTR2A	88	9	16792	42.404	1	0.347325	55.6425
GOTERM_BP_DIRECT	GO:0060316~positive regulation of ryanodine-sensitive calcium-release channel activity	2	2.27273	0.0456852	CALM3, CALM1	88	9	16792	42.404	1	0.347325	55.6425
GOTERM_BP_DIRECT	GO:0010907~positive regulation of glucose metabolic process	2	2.27273	0.0456852	AKT1, SRC	88	9	16792	42.404	1	0.347325	55.6425
GOTERM_BP_DIRECT	GO:0010873~positive regulation of cholesterol esterification	2	2.27273	0.0456852	AGTR1, AGT	88	9	16792	42.404	1	0.347325	55.6425
GOTERM_BP_DIRECT	GO:0002024~diet induced thermogenesis	2	2.27273	0.0456852	ADRB2, ADRB1	88	9	16792	42.404	1	0.347325	55.6425
GOTERM_BP_DIRECT	GO:0007184~SMAD protein import into nucleus	2	2.27273	0.0456852	JUN, TGFB1	88	9	16792	42.404	1	0.347325	55.6425
GOTERM_BP_DIRECT	GO:0009651~response to salt stress	2	2.27273	0.0456852	TNF, TH	88	9	16792	42.404	1	0.347325	55.6425
GOTERM_BP_DIRECT	GO:2000008~regulation of protein localization to cell surface	2	2.27273	0.0456852	BDNF, CTNNB1	88	9	16792	42.404	1	0.347325	55.6425
GOTERM_BP_DIRECT	GO:0033555~multicellular organismal response to stress	2	2.27273	0.0456852	NOS1, PTEN	88	9	16792	42.404	1	0.347325	55.6425
GOTERM_BP_DIRECT	GO:2000304~positive regulation of ceramide biosynthetic process	2	2.27273	0.0456852	TNF, PRKCD	88	9	16792	42.404	1	0.347325	55.6425
GOTERM_BP_DIRECT	GO:0003084~positive regulation of systemic arterial blood pressure	2	2.27273	0.0456852	ACE, AVP	88	9	16792	42.404	1	0.347325	55.6425
GOTERM_BP_DIRECT	GO:0000733~DNA strand renaturation	2	2.27273	0.0456852	ANXA1, TP53	88	9	16792	42.404	1	0.347325	55.6425
GOTERM_BP_DIRECT	GO:0030183~B cell differentiation	3	3.40909	0.0459668	IL4, VCAM1, IL10	88	66	16792	8.67355	1	0.347924	55.8694
GOTERM_BP_DIRECT	GO:0038166~angiotensin-activated signaling pathway	2	2.27273	0.0506322	AGTR1, AGT	88	10	16792	38.1636	1	0.375121	59.4744
GOTERM_BP_DIRECT	GO:0048643~positive regulation of skeletal muscle tissue development	2	2.27273	0.0506322	SHH, CTNNB1	88	10	16792	38.1636	1	0.375121	59.4744
GOTERM_BP_DIRECT	GO:0016572~histone phosphorylation	2	2.27273	0.0506322	PRKCD, ATM	88	10	16792	38.1636	1	0.375121	59.4744
GOTERM_BP_DIRECT	GO:0046888~negative regulation of hormone secretion	2	2.27273	0.0506322	EDN1, ADIPOQ	88	10	16792	38.1636	1	0.375121	59.4744
GOTERM_BP_DIRECT	GO:0033148~positive regulation of intracellular estrogen receptor signaling pathway	2	2.27273	0.0506322	AR, PARP1	88	10	16792	38.1636	1	0.375121	59.4744
GOTERM_BP_DIRECT	GO:0031953~negative regulation of protein autophosphorylation	2	2.27273	0.0506322	JUN, ADIPOQ	88	10	16792	38.1636	1	0.375121	59.4744
GOTERM_BP_DIRECT	GO:0045792~negative regulation of cell size	2	2.27273	0.0506322	AKT1, PTEN	88	10	16792	38.1636	1	0.375121	59.4744
GOTERM_BP_DIRECT	GO:0060484~lung-associated mesenchyme development	2	2.27273	0.0506322	SHH, CTNNB1	88	10	16792	38.1636	1	0.375121	59.4744
GOTERM_BP_DIRECT	GO:0046902~regulation of mitochondrial membrane permeability	2	2.27273	0.0506322	TP53, STAT3	88	10	16792	38.1636	1	0.375121	59.4744
GOTERM_BP_DIRECT	GO:0019732~antifungal humoral response	2	2.27273	0.0506322	CALCA, TAC1	88	10	16792	38.1636	1	0.375121	59.4744
GOTERM_BP_DIRECT	GO:0051146~striated muscle cell differentiation	2	2.27273	0.0506322	AKT1, MAPK14	88	10	16792	38.1636	1	0.375121	59.4744
GOTERM_BP_DIRECT	GO:0050729~positive regulation of inflammatory response	3	3.40909	0.0550344	AGTR1, AGT, SERPINE1	88	73	16792	7.84184	1	0.399599	62.6198
GOTERM_BP_DIRECT	GO:0045820~negative regulation of glycolytic process	2	2.27273	0.0555539	PPARA, STAT3	88	11	16792	34.6942	1	0.401309	62.9754
GOTERM_BP_DIRECT	GO:0072520~seminiferous tubule development	2	2.27273	0.0555539	AR, SMAD4	88	11	16792	34.6942	1	0.401309	62.9754
GOTERM_BP_DIRECT	GO:0048149~behavioral response to ethanol	2	2.27273	0.0555539	OPRM1, DRD2	88	11	16792	34.6942	1	0.401309	62.9754
GOTERM_BP_DIRECT	GO:0061045~negative regulation of wound healing	2	2.27273	0.0555539	SERPINE1, SMAD3	88	11	16792	34.6942	1	0.401309	62.9754
GOTERM_BP_DIRECT	GO:0030431~sleep	2	2.27273	0.0555539	FOS, HTR2A	88	11	16792	34.6942	1	0.401309	62.9754
GOTERM_BP_DIRECT	GO:0032495~response to muramyl dipeptide	2	2.27273	0.0555539	MAPK14, RELA	88	11	16792	34.6942	1	0.401309	62.9754
GOTERM_BP_DIRECT	GO:0010763~positive regulation of fibroblast migration	2	2.27273	0.0555539	AKT1, TGFB1	88	11	16792	34.6942	1	0.401309	62.9754
GOTERM_BP_DIRECT	GO:0030334~regulation of cell migration	3	3.40909	0.0563776	AKT1, SGK1, TGFB1	88	74	16792	7.73587	1	0.40472	63.5328
GOTERM_BP_DIRECT	GO:0001944~vasculature development	2	2.27273	0.0604503	CALCA, PIK3CA	88	12	16792	31.803	1	0.426004	66.1742
GOTERM_BP_DIRECT	GO:0002031~G-protein coupled receptor internalization	2	2.27273	0.0604503	CALCA, DRD2	88	12	16792	31.803	1	0.426004	66.1742
GOTERM_BP_DIRECT	GO:0071498~cellular response to fluid shear stress	2	2.27273	0.0604503	PTGS2, SRC	88	12	16792	31.803	1	0.426004	66.1742
GOTERM_BP_DIRECT	GO:0032228~regulation of synaptic transmission, GABAergic	2	2.27273	0.0604503	DRD2, PTEN	88	12	16792	31.803	1	0.426004	66.1742
GOTERM_BP_DIRECT	GO:0060315~negative regulation of ryanodine-sensitive calcium-release channel activity	2	2.27273	0.0604503	CALM3, CALM1	88	12	16792	31.803	1	0.426004	66.1742
GOTERM_BP_DIRECT	GO:0097028~dendritic cell differentiation	2	2.27273	0.0604503	IL4, CSF2	88	12	16792	31.803	1	0.426004	66.1742
GOTERM_BP_DIRECT	GO:0042136~neurotransmitter biosynthetic process	2	2.27273	0.0604503	NOS1, TH	88	12	16792	31.803	1	0.426004	66.1742
GOTERM_BP_DIRECT	GO:0045778~positive regulation of ossification	2	2.27273	0.0604503	CALCA, TAC1	88	12	16792	31.803	1	0.426004	66.1742
GOTERM_BP_DIRECT	GO:0071872~cellular response to epinephrine stimulus	2	2.27273	0.0604503	PRKACA, ADIPOQ	88	12	16792	31.803	1	0.426004	66.1742
GOTERM_BP_DIRECT	GO:0043950~positive regulation of cAMP-mediated signaling	2	2.27273	0.0604503	OPRM1, ADRB1	88	12	16792	31.803	1	0.426004	66.1742
GOTERM_BP_DIRECT	GO:0090399~replicative senescence	2	2.27273	0.0604503	TP53, ATM	88	12	16792	31.803	1	0.426004	66.1742
GOTERM_BP_DIRECT	GO:0040015~negative regulation of multicellular organism growth	2	2.27273	0.0604503	ADRB2, ADRB1	88	12	16792	31.803	1	0.426004	66.1742
GOTERM_BP_DIRECT	GO:0001774~microglial cell activation	2	2.27273	0.0604503	IL4, JUN	88	12	16792	31.803	1	0.426004	66.1742
GOTERM_BP_DIRECT	GO:0060766~negative regulation of androgen receptor signaling pathway	2	2.27273	0.0604503	SIRT1, SMARCA4	88	12	16792	31.803	1	0.426004	66.1742
GOTERM_BP_DIRECT	GO:0045454~cell redox homeostasis	3	3.40909	0.0604752	NOS1, NOS3, NOS2	88	77	16792	7.43447	1	0.424853	66.1898
GOTERM_BP_DIRECT	GO:0007399~nervous system development	5	5.68182	0.0619102	FOS, BDNF, CHRM1, STAT3, SMARCA4	88	287	16792	3.32436	1	0.431302	67.0763
GOTERM_BP_DIRECT	GO:0001558~regulation of cell growth	3	3.40909	0.0646721	AGTR1, SGK1, AGT	88	80	16792	7.15568	1	0.44461	68.7214
GOTERM_BP_DIRECT	GO:0050776~regulation of immune response	4	4.54545	0.0651159	IL4, VCAM1, CD34, SMAD3	88	178	16792	4.28805	1	0.445617	68.9784
GOTERM_BP_DIRECT	GO:0060134~prepulse inhibition	2	2.27273	0.0653216	DRD2, PTEN	88	13	16792	29.3566	1	0.445384	69.0968
GOTERM_BP_DIRECT	GO:2001275~positive regulation of glucose import in response to insulin stimulus	2	2.27273	0.0653216	AGT, PIK3R3	88	13	16792	29.3566	1	0.445384	69.0968
GOTERM_BP_DIRECT	GO:0050435~beta-amyloid metabolic process	2	2.27273	0.0653216	ACE, REN	88	13	16792	29.3566	1	0.445384	69.0968
GOTERM_BP_DIRECT	GO:0060425~lung morphogenesis	2	2.27273	0.0653216	MAPK1, MAPK3	88	13	16792	29.3566	1	0.445384	69.0968
GOTERM_BP_DIRECT	GO:0060047~heart contraction	2	2.27273	0.0653216	CDC42, ACE	88	13	16792	29.3566	1	0.445384	69.0968
GOTERM_BP_DIRECT	GO:0014059~regulation of dopamine secretion	2	2.27273	0.0653216	DRD2, HTR2A	88	13	16792	29.3566	1	0.445384	69.0968
GOTERM_BP_DIRECT	GO:0007398~ectoderm development	2	2.27273	0.0653216	SHH, CTNNB1	88	13	16792	29.3566	1	0.445384	69.0968
GOTERM_BP_DIRECT	GO:0045651~positive regulation of macrophage differentiation	2	2.27273	0.0653216	CALCA, CASP8	88	13	16792	29.3566	1	0.445384	69.0968
GOTERM_BP_DIRECT	GO:0048599~oocyte development	2	2.27273	0.0653216	ATM, CTNNB1	88	13	16792	29.3566	1	0.445384	69.0968
GOTERM_BP_DIRECT	GO:0030818~negative regulation of cAMP biosynthetic process	2	2.27273	0.0653216	EDN1, ADRA2A	88	13	16792	29.3566	1	0.445384	69.0968
GOTERM_BP_DIRECT	GO:0042711~maternal behavior	2	2.27273	0.0653216	AVP, PTEN	88	13	16792	29.3566	1	0.445384	69.0968
GOTERM_BP_DIRECT	GO:0008340~determination of adult lifespan	2	2.27273	0.0653216	TP53, ATM	88	13	16792	29.3566	1	0.445384	69.0968
GOTERM_BP_DIRECT	GO:0031641~regulation of myelination	2	2.27273	0.0653216	AKT1, CTNNB1	88	13	16792	29.3566	1	0.445384	69.0968
GOTERM_BP_DIRECT	GO:0035810~positive regulation of urine volume	2	2.27273	0.0653216	DRD2, EDN1	88	13	16792	29.3566	1	0.445384	69.0968
GOTERM_BP_DIRECT	GO:0050709~negative regulation of protein secretion	2	2.27273	0.0653216	DRD2, ANXA1	88	13	16792	29.3566	1	0.445384	69.0968
GOTERM_BP_DIRECT	GO:0050901~leukocyte tethering or rolling	2	2.27273	0.0653216	VCAM1, TNF	88	13	16792	29.3566	1	0.445384	69.0968
GOTERM_BP_DIRECT	GO:0046628~positive regulation of insulin receptor signaling pathway	2	2.27273	0.0653216	SIRT1, SRC	88	13	16792	29.3566	1	0.445384	69.0968
GOTERM_BP_DIRECT	GO:0070306~lens fiber cell differentiation	2	2.27273	0.0653216	SMAD3, TGFB1	88	13	16792	29.3566	1	0.445384	69.0968
GOTERM_BP_DIRECT	GO:0097296~activation of cysteine-type endopeptidase activity involved in apoptotic signaling pathway	2	2.27273	0.0653216	CASP8, SMAD3	88	13	16792	29.3566	1	0.445384	69.0968
GOTERM_BP_DIRECT	GO:0032516~positive regulation of phosphoprotein phosphatase activity	2	2.27273	0.0653216	CALM3, CALM1	88	13	16792	29.3566	1	0.445384	69.0968
GOTERM_BP_DIRECT	GO:0050872~white fat cell differentiation	2	2.27273	0.0653216	PPARG, SIRT1	88	13	16792	29.3566	1	0.445384	69.0968
GOTERM_BP_DIRECT	GO:0001516~prostaglandin biosynthetic process	2	2.27273	0.070168	PTGS2, EDN1	88	14	16792	27.2597	1	0.468649	71.7671
GOTERM_BP_DIRECT	GO:0045821~positive regulation of glycolytic process	2	2.27273	0.070168	HIF1A, HTR2A	88	14	16792	27.2597	1	0.468649	71.7671
GOTERM_BP_DIRECT	GO:0071354~cellular response to interleukin-6	2	2.27273	0.070168	RELA, NFKB1	88	14	16792	27.2597	1	0.468649	71.7671
GOTERM_BP_DIRECT	GO:0030194~positive regulation of blood coagulation	2	2.27273	0.070168	F2, SERPINE1	88	14	16792	27.2597	1	0.468649	71.7671
GOTERM_BP_DIRECT	GO:1902176~negative regulation of oxidative stress-induced intrinsic apoptotic signaling pathway	2	2.27273	0.070168	AKT1, SIRT1	88	14	16792	27.2597	1	0.468649	71.7671
GOTERM_BP_DIRECT	GO:0048148~behavioral response to cocaine	2	2.27273	0.070168	DRD2, HTR2A	88	14	16792	27.2597	1	0.468649	71.7671
GOTERM_BP_DIRECT	GO:0035729~cellular response to hepatocyte growth factor stimulus	2	2.27273	0.070168	RELA, IL10	88	14	16792	27.2597	1	0.468649	71.7671
GOTERM_BP_DIRECT	GO:0050892~intestinal absorption	2	2.27273	0.070168	VDR, ADRA2A	88	14	16792	27.2597	1	0.468649	71.7671
GOTERM_BP_DIRECT	GO:0090303~positive regulation of wound healing	2	2.27273	0.070168	ADRA2A, ANXA1	88	14	16792	27.2597	1	0.468649	71.7671
GOTERM_BP_DIRECT	GO:0030889~negative regulation of B cell proliferation	2	2.27273	0.070168	IL10, ATM	88	14	16792	27.2597	1	0.468649	71.7671
GOTERM_BP_DIRECT	GO:0007625~grooming behavior	2	2.27273	0.070168	AVP, DRD2	88	14	16792	27.2597	1	0.468649	71.7671
GOTERM_BP_DIRECT	GO:0048009~insulin-like growth factor receptor signaling pathway	2	2.27273	0.070168	AKT1, IGF1R	88	14	16792	27.2597	1	0.468649	71.7671
GOTERM_BP_DIRECT	GO:0014912~negative regulation of smooth muscle cell migration	2	2.27273	0.070168	SERPINE1, ADIPOQ	88	14	16792	27.2597	1	0.468649	71.7671
GOTERM_BP_DIRECT	GO:0010875~positive regulation of cholesterol efflux	2	2.27273	0.070168	ADIPOQ, SIRT1	88	14	16792	27.2597	1	0.468649	71.7671
GOTERM_BP_DIRECT	GO:0010801~negative regulation of peptidyl-threonine phosphorylation	2	2.27273	0.070168	CALM3, CALM1	88	14	16792	27.2597	1	0.468649	71.7671
GOTERM_BP_DIRECT	GO:0005513~detection of calcium ion	2	2.27273	0.070168	CALM3, CALM1	88	14	16792	27.2597	1	0.468649	71.7671
GOTERM_BP_DIRECT	GO:0050965~detection of temperature stimulus involved in sensory perception of pain	2	2.27273	0.070168	CALCA, HTR2A	88	14	16792	27.2597	1	0.468649	71.7671
GOTERM_BP_DIRECT	GO:0051897~positive regulation of protein kinase B signaling	3	3.40909	0.0704155	TNF, TGFB1, SRC	88	84	16792	6.81494	1	0.468551	71.8974
GOTERM_BP_DIRECT	GO:0045087~innate immune response	6	6.81818	0.0724829	CALCA, PPARG, ANXA1, TAC1, NFKB1, SRC	88	430	16792	2.66258	1	0.477364	72.9644
GOTERM_BP_DIRECT	GO:0043122~regulation of I-kappaB kinase/NF-kappaB signaling	2	2.27273	0.0749895	TNF, IL1B	88	15	16792	25.4424	1	0.488076	74.2067
GOTERM_BP_DIRECT	GO:0048714~positive regulation of oligodendrocyte differentiation	2	2.27273	0.0749895	PPARG, SHH	88	15	16792	25.4424	1	0.488076	74.2067
GOTERM_BP_DIRECT	GO:0097009~energy homeostasis	2	2.27273	0.0749895	PIK3CA, STAT3	88	15	16792	25.4424	1	0.488076	74.2067
GOTERM_BP_DIRECT	GO:1904707~positive regulation of vascular smooth muscle cell proliferation	2	2.27273	0.0749895	AGT, IL10	88	15	16792	25.4424	1	0.488076	74.2067
GOTERM_BP_DIRECT	GO:2000679~positive regulation of transcription regulatory region DNA binding	2	2.27273	0.0749895	PARP1, TGFB1	88	15	16792	25.4424	1	0.488076	74.2067
GOTERM_BP_DIRECT	GO:2000310~regulation of N-methyl-D-aspartate selective glutamate receptor activity	2	2.27273	0.0749895	OPRM1, CRH	88	15	16792	25.4424	1	0.488076	74.2067
GOTERM_BP_DIRECT	GO:0007160~cell-matrix adhesion	3	3.40909	0.0793282	VCAM1, CD34, CTNNB1	88	90	16792	6.36061	1	0.506978	76.2309
GOTERM_BP_DIRECT	GO:0051895~negative regulation of focal adhesion assembly	2	2.27273	0.0797863	PTEN, SRC	88	16	16792	23.8523	1	0.507718	76.4357
GOTERM_BP_DIRECT	GO:1904355~positive regulation of telomere capping	2	2.27273	0.0797863	MAPK1, MAPK3	88	16	16792	23.8523	1	0.507718	76.4357
GOTERM_BP_DIRECT	GO:0010608~posttranscriptional regulation of gene expression	2	2.27273	0.0797863	ACE, CAV1	88	16	16792	23.8523	1	0.507718	76.4357
GOTERM_BP_DIRECT	GO:0030949~positive regulation of vascular endothelial growth factor receptor signaling pathway	2	2.27273	0.0797863	HIF1A, IL1B	88	16	16792	23.8523	1	0.507718	76.4357
GOTERM_BP_DIRECT	GO:0070848~response to growth factor	2	2.27273	0.0797863	OPRM1, P2RY1	88	16	16792	23.8523	1	0.507718	76.4357
GOTERM_BP_DIRECT	GO:0008209~androgen metabolic process	2	2.27273	0.0797863	ESR1, SHH	88	16	16792	23.8523	1	0.507718	76.4357
GOTERM_BP_DIRECT	GO:0030279~negative regulation of ossification	2	2.27273	0.0797863	CALCA, TGFB1	88	16	16792	23.8523	1	0.507718	76.4357
GOTERM_BP_DIRECT	GO:0071380~cellular response to prostaglandin E stimulus	2	2.27273	0.0845585	AKT1, PPARG	88	17	16792	22.4492	1	0.527686	78.4721
GOTERM_BP_DIRECT	GO:0001702~gastrulation with mouth forming second	2	2.27273	0.0845585	SMAD4, CTNNB1	88	17	16792	22.4492	1	0.527686	78.4721
GOTERM_BP_DIRECT	GO:0090201~negative regulation of release of cytochrome c from mitochondria	2	2.27273	0.0845585	AKT1, AVP	88	17	16792	22.4492	1	0.527686	78.4721
GOTERM_BP_DIRECT	GO:0042523~positive regulation of tyrosine phosphorylation of Stat5 protein	2	2.27273	0.0845585	IL4, CSF2	88	17	16792	22.4492	1	0.527686	78.4721
GOTERM_BP_DIRECT	GO:0010259~multicellular organism aging	2	2.27273	0.0845585	EDN1, TH	88	17	16792	22.4492	1	0.527686	78.4721
GOTERM_BP_DIRECT	GO:0048663~neuron fate commitment	2	2.27273	0.0845585	SMAD4, SHH	88	17	16792	22.4492	1	0.527686	78.4721
GOTERM_BP_DIRECT	GO:0060749~mammary gland alveolus development	2	2.27273	0.0845585	AR, ESR1	88	17	16792	22.4492	1	0.527686	78.4721
GOTERM_BP_DIRECT	GO:0002076~osteoblast development	2	2.27273	0.0845585	SMAD3, SHH	88	17	16792	22.4492	1	0.527686	78.4721
GOTERM_BP_DIRECT	GO:0030902~hindbrain development	2	2.27273	0.0845585	SHH, CTNNB1	88	17	16792	22.4492	1	0.527686	78.4721
GOTERM_BP_DIRECT	GO:0030193~regulation of blood coagulation	2	2.27273	0.0845585	CAV1, F2	88	17	16792	22.4492	1	0.527686	78.4721
GOTERM_BP_DIRECT	GO:0051571~positive regulation of histone H3-K4 methylation	2	2.27273	0.0845585	SMAD4, CTNNB1	88	17	16792	22.4492	1	0.527686	78.4721
GOTERM_BP_DIRECT	GO:0032722~positive regulation of chemokine production	2	2.27273	0.0845585	TNF, HIF1A	88	17	16792	22.4492	1	0.527686	78.4721
GOTERM_BP_DIRECT	GO:1901741~positive regulation of myoblast fusion	2	2.27273	0.0845585	IL4, MAPK14	88	17	16792	22.4492	1	0.527686	78.4721
GOTERM_BP_DIRECT	GO:0044849~estrous cycle	2	2.27273	0.0845585	OPRM1, ANXA1	88	17	16792	22.4492	1	0.527686	78.4721
GOTERM_BP_DIRECT	GO:0006355~regulation of transcription, DNA-templated	13	14.7727	0.0869429	AR, ESR1, SMAD4, TP53, NR3C2, SMAD3, NR3C1, ESR2, STAT3, VDR, HIF1A, SP1, SMARCA4	88	1504	16792	1.64936	1	0.536656	79.4264
GOTERM_BP_DIRECT	GO:0001935~endothelial cell proliferation	2	2.27273	0.0893062	CALCA, CD34	88	18	16792	21.202	1	0.545326	80.3327
GOTERM_BP_DIRECT	GO:0048169~regulation of long-term neuronal synaptic plasticity	2	2.27273	0.0893062	DRD2, AGT	88	18	16792	21.202	1	0.545326	80.3327
GOTERM_BP_DIRECT	GO:0060324~face development	2	2.27273	0.0893062	MAPK1, MAPK3	88	18	16792	21.202	1	0.545326	80.3327
GOTERM_BP_DIRECT	GO:0001708~cell fate specification	2	2.27273	0.0893062	SHH, CTNNB1	88	18	16792	21.202	1	0.545326	80.3327
GOTERM_BP_DIRECT	GO:0030539~male genitalia development	2	2.27273	0.0893062	SHH, CTNNB1	88	18	16792	21.202	1	0.545326	80.3327
GOTERM_BP_DIRECT	GO:0045216~cell-cell junction organization	2	2.27273	0.0893062	SMAD3, TGFB1	88	18	16792	21.202	1	0.545326	80.3327
GOTERM_BP_DIRECT	GO:0033280~response to vitamin D	2	2.27273	0.0893062	PTGS2, TGFB1	88	18	16792	21.202	1	0.545326	80.3327
GOTERM_BP_DIRECT	GO:0010880~regulation of release of sequestered calcium ion into cytosol by sarcoplasmic reticulum	2	2.27273	0.0893062	CALM3, CALM1	88	18	16792	21.202	1	0.545326	80.3327
GOTERM_BP_DIRECT	GO:0090190~positive regulation of branching involved in ureteric bud morphogenesis	2	2.27273	0.0940297	AGT, TGFB1	88	19	16792	20.0861	1	0.563432	82.0326
GOTERM_BP_DIRECT	GO:0051493~regulation of cytoskeleton organization	2	2.27273	0.0940297	MAPK1, MAPK3	88	19	16792	20.0861	1	0.563432	82.0326
GOTERM_BP_DIRECT	GO:0042832~defense response to protozoan	2	2.27273	0.0940297	IL4, IL10	88	19	16792	20.0861	1	0.563432	82.0326
GOTERM_BP_DIRECT	GO:0045672~positive regulation of osteoclast differentiation	2	2.27273	0.0940297	FOS, TNF	88	19	16792	20.0861	1	0.563432	82.0326
GOTERM_BP_DIRECT	GO:0006883~cellular sodium ion homeostasis	2	2.27273	0.0940297	SGK1, AGT	88	19	16792	20.0861	1	0.563432	82.0326
GOTERM_BP_DIRECT	GO:0010765~positive regulation of sodium ion transport	2	2.27273	0.0940297	AKT1, SGK1	88	19	16792	20.0861	1	0.563432	82.0326
GOTERM_BP_DIRECT	GO:0050771~negative regulation of axonogenesis	2	2.27273	0.0940297	NGFR, PTEN	88	19	16792	20.0861	1	0.563432	82.0326
GOTERM_BP_DIRECT	GO:0032332~positive regulation of chondrocyte differentiation	2	2.27273	0.0940297	RELA, SMAD3	88	19	16792	20.0861	1	0.563432	82.0326
GOTERM_BP_DIRECT	GO:0050767~regulation of neurogenesis	2	2.27273	0.0940297	NOS1, CTNNB1	88	19	16792	20.0861	1	0.563432	82.0326
GOTERM_BP_DIRECT	GO:0060716~labyrinthine layer blood vessel development	2	2.27273	0.0940297	AKT1, MAPK1	88	19	16792	20.0861	1	0.563432	82.0326
GOTERM_BP_DIRECT	GO:0043393~regulation of protein binding	2	2.27273	0.0940297	PRKACA, SRC	88	19	16792	20.0861	1	0.563432	82.0326
GOTERM_BP_DIRECT	GO:0010975~regulation of neuron projection development	2	2.27273	0.0940297	AKT1, PTEN	88	19	16792	20.0861	1	0.563432	82.0326
GOTERM_BP_DIRECT	GO:0034220~ion transmembrane transport	4	4.54545	0.0955537	SGK1, GRIN2B, CALM3, CALM1	88	210	16792	3.63463	1	0.568176	82.5508
GOTERM_BP_DIRECT	GO:0007218~neuropeptide signaling pathway	3	3.40909	0.0965075	OPRM1, CALCA, TAC1	88	101	16792	5.66787	1	0.57059	82.8679
GOTERM_BP_DIRECT	GO:0045777~positive regulation of blood pressure	2	2.27273	0.0987288	AGT, ADIPOQ	88	20	16792	19.0818	1	0.577929	83.5856
GOTERM_BP_DIRECT	GO:0035584~calcium-mediated signaling using intracellular calcium source	2	2.27273	0.0987288	VCAM1, PRKACA	88	20	16792	19.0818	1	0.577929	83.5856
GOTERM_BP_DIRECT	GO:0001892~embryonic placenta development	2	2.27273	0.0987288	CSF2, HIF1A	88	20	16792	19.0818	1	0.577929	83.5856
GOTERM_BP_DIRECT	GO:0034614~cellular response to reactive oxygen species	2	2.27273	0.0987288	FOS, SRC	88	20	16792	19.0818	1	0.577929	83.5856
GOTERM_BP_DIRECT	GO:0046697~decidualization	2	2.27273	0.0987288	VDR, PTGS2	88	20	16792	19.0818	1	0.577929	83.5856
GOTERM_BP_DIRECT	GO:0071385~cellular response to glucocorticoid stimulus	2	2.27273	0.0987288	EDN1, ANXA1	88	20	16792	19.0818	1	0.577929	83.5856
