# Supplementary material for: A Network Pharmacology Approach to Investigate the Active Compounds and Mechanisms of Musk for Ischemic Stroke
Source: Evid Based Complement Alternat Med. 2020 Jul 3;2020:4063180. doi: 10.1155/2020/4063180 (PMC7354650; doi:10.1155/2020/4063180)
Supplement: Supplementary Materials — The detailed information of chemical composition and predicted target of musk (S1), ischemic stroke target (S2), string data (S3), compound target analysis data (S4), Gene Ontology enrichment analysis results (S5, S6, and S7), and KEGG enrichment analysis results (S8 and S9) used to support the findings of this study is included within the supplementary information files. [file 4063180.f1.zip › 4063180.f1/S6.DAVID Core Gene GO CC.xls]

## Sheet: Sheet1
Category	Term	Count	%	PValue	Genes	List Total	Pop Hits	Pop Total	Fold Enrichment	Bonferroni	Benjamini	FDR
GOTERM_CC_DIRECT	GO:0005654~nucleoplasm	39	44.3182	2.19287e-10	PPARA, PPARG, NR3C2, NFKB1, NR3C1, PTEN, CTNNB1, AKT1, FOS, VDR, CASP3, CASP8, PRKACA, ACTB, SREBF1, AR, SGK1, RELA, ANXA1, TP53, SMAD4, ESR1, SMAD3, ESR2, PRKCD, SIRT1, ATM, STAT3, MAPK1, HIF1A, SP1, JUN, MAPK14, MAPK3, CALM3, NGFR, PARP1, CALM1, SMARCA4	88	2784	18224	2.90106	4.67082e-08	4.67082e-08	2.77686e-07
GOTERM_CC_DIRECT	GO:0005829~cytosol	41	46.5909	2.36828e-09	TH, PPARG, NFKB1, PTEN, SRC, SHH, CTNNB1, AKT1, FOS, CDC42, CASP3, CASP8, IL1B, PIK3CA, HSPA4, NOS3, PRKACA, NOS2, NQO1, PIK3R3, ACTB, SREBF1, AR, SGK1, AVP, NOS1, RELA, TP53, SMAD4, SMAD3, PRKCD, STAT3, MAPK1, HIF1A, JUN, MAPK14, MAPK3, CALM3, NGFR, CALM1, HTR2A	88	3315	18224	2.56131	5.04444e-07	2.52222e-07	2.99899e-06
GOTERM_CC_DIRECT	GO:0043234~protein complex	15	17.0455	8.82146e-09	ACTB, SREBF1, CAV1, AR, NOS1, PTGS2, ANXA1, TP53, NR3C1, CTNNB1, AKT1, MAPK1, MAPK3, PARP1, SMARCA4	88	412	18224	7.53972	1.87897e-06	6.26323e-07	1.11707e-05
GOTERM_CC_DIRECT	GO:0005886~plasma membrane	45	51.1364	1.05246e-08	OPRM1, CAV1, TNF, DRD2, TAC1, PTEN, SRC, SHH, TGFB1, CTNNB1, VCAM1, AKT1, AGTR1, IGF1R, CDC42, CASP3, ACE, GRIN2B, REN, P2RY1, SERPINE1, ADRA2A, PIK3CA, NOS3, PRKACA, ACTB, AR, SGK1, ANXA1, ESR1, SMAD3, ABCB1, PRKCD, PLG, STAT3, ADRB2, ADRB1, CD34, CHRM1, F2, CX3CR1, CALM3, NGFR, CALM1, HTR2A	88	4121	18224	2.26137	2.24174e-06	5.60434e-07	1.33274e-05
GOTERM_CC_DIRECT	GO:0005615~extracellular space	25	28.4091	1.06258e-08	CSF2, TNF, EDN1, CRP, TAC1, SHH, TGFB1, IL10, CALCA, VCAM1, ACE, REN, AGT, SERPINE1, IL1B, ACTB, IL4, AVP, ANXA1, ADIPOQ, PLG, F2, CRH, MPO, SMARCA4	88	1347	18224	3.84356	2.26328e-06	4.52657e-07	1.34555e-05
GOTERM_CC_DIRECT	GO:0005576~extracellular region	27	30.6818	1.66152e-08	CSF2, TNF, EDN1, CRP, TAC1, PTEN, IL10, TGFB1, SHH, CALCA, BDNF, ACE, AGT, REN, SERPINE1, IL1B, IL4, AVP, ANXA1, ESR2, ADIPOQ, PLG, F2, CRH, CALM3, NGFR, CALM1	88	1610	18224	3.47295	3.53904e-06	5.89841e-07	2.10401e-05
GOTERM_CC_DIRECT	GO:0005901~caveola	8	9.09091	2.45966e-08	MAPK1, CAV1, NOS1, PTGS2, MAPK3, NOS3, SRC, HTR2A	88	65	18224	25.4881	5.23907e-06	7.4844e-07	3.1147e-05
GOTERM_CC_DIRECT	GO:0000790~nuclear chromatin	11	12.5	2.7726e-08	ACTB, AR, SP1, RELA, TP53, SMAD4, ESR1, SMAD3, SIRT1, STAT3, SMARCA4	88	193	18224	11.8031	5.90561e-06	7.38204e-07	3.51098e-05
GOTERM_CC_DIRECT	GO:0043005~neuron projection	11	12.5	1.90702e-07	OPRM1, CDC42, FOS, GRIN2B, PTGS2, CASP8, TH, CX3CR1, NGFR, PTEN, SRC	88	237	18224	9.61181	4.06187e-05	4.51327e-06	0.000241488
GOTERM_CC_DIRECT	GO:0005634~nucleus	46	52.2727	1.3614e-05	PPARA, PTGS2, TH, PPARG, NR3C2, NFKB1, NR3C1, PTEN, SRC, TGFB1, CTNNB1, CALCA, AKT1, FOS, VDR, CASP3, NOS3, PRKACA, NOS2, SREBF1, AR, SGK1, RELA, ANXA1, TP53, SMAD4, ESR1, SMAD3, ESR2, PRKCD, SIRT1, ATM, STAT3, MAPK1, ADRB2, HIF1A, SP1, JUN, MAPK14, MAPK3, MPO, CALM3, NGFR, PARP1, SMARCA4, CALM1	88	5415	18224	1.75922	0.0028956	0.000289938	0.0172382
GOTERM_CC_DIRECT	GO:0090575~RNA polymerase II transcription factor complex	5	5.68182	1.78364e-05	VDR, HIF1A, PPARG, SMAD4, STAT3	88	33	18224	31.3774	0.00379197	0.000345321	0.0225841
GOTERM_CC_DIRECT	GO:0005737~cytoplasm	44	50	3.32511e-05	PTGS2, EDN1, TH, NFKB1, NR3C1, PTEN, IL10, SRC, TGFB1, CTNNB1, CALCA, AKT1, CDC42, CASP3, BDNF, AGT, CASP8, ADRA2A, NOS3, NOS2, NQO1, ACTB, SREBF1, AR, SGK1, NOS1, RELA, ANXA1, TP53, SMAD4, ESR1, SMAD3, PRKCD, SIRT1, STAT3, ATM, MAPK1, HIF1A, SP1, CD34, MAPK14, CRH, CALM3, CALM1	88	5222	18224	1.74493	0.00705758	0.000590043	0.0420981
GOTERM_CC_DIRECT	GO:0005667~transcription factor complex	8	9.09091	3.83021e-05	FOS, HIF1A, RELA, JUN, SMAD4, SMAD3, PARP1, CTNNB1	88	193	18224	8.58408	0.00812532	0.000627381	0.0484917
GOTERM_CC_DIRECT	GO:0005739~mitochondrion	18	20.4545	0.000159843	SGK1, NOS1, TH, TP53, NFKB1, ESR2, SIRT1, PTEN, SRC, AKT1, MAPK1, MAPK14, CASP8, P2RY1, MAPK3, MPO, PRKACA, PARP1	88	1331	18224	2.80063	0.0334762	0.00242914	0.202223
GOTERM_CC_DIRECT	GO:0009986~cell surface	11	12.5	0.000255595	VCAM1, TNF, GRIN2B, P2RY1, ANXA1, ABCB1, NGFR, ADIPOQ, TGFB1, PLG, SHH	88	542	18224	4.20295	0.052993	0.00362334	0.323182
GOTERM_CC_DIRECT	GO:0043235~receptor complex	6	6.81818	0.000355408	VDR, IGF1R, ADRB2, NR3C2, ADRA2A, SMAD3	88	127	18224	9.78382	0.0729199	0.00472103	0.449126
GOTERM_CC_DIRECT	GO:0045121~membrane raft	7	7.95455	0.00045775	OPRM1, CAV1, CASP3, TNF, NOS1, CASP8, SHH	88	206	18224	7.03707	0.0929185	0.00572022	0.57811
GOTERM_CC_DIRECT	GO:0005764~lysosome	7	7.95455	0.00074479	ACE, ADRB2, CD34, REN, IL1B, MPO, SRC	88	226	18224	6.41432	0.146747	0.00877788	0.939052
GOTERM_CC_DIRECT	GO:0043204~perikaryon	5	5.68182	0.00166196	OPRM1, MAPK1, DRD2, TH, CRH	88	106	18224	9.76844	0.29833	0.0184742	2.08429
GOTERM_CC_DIRECT	GO:0070062~extracellular exosome	25	28.4091	0.00257451	ACTB, CRP, ANXA1, ABCB1, PRKCD, ADIPOQ, PLG, SRC, CTNNB1, VCAM1, MAPK1, CDC42, ACE, AGT, MAPK14, F2, MAPK3, SERPINE1, MPO, IL1B, CALM3, HSPA4, PRKACA, NQO1, CALM1	88	2811	18224	1.84179	0.422518	0.0270804	3.21163
GOTERM_CC_DIRECT	GO:0005925~focal adhesion	8	9.09091	0.00265957	ACTB, OPRM1, CDC42, MAPK1, CAV1, MAPK3, ANXA1, CTNNB1	88	391	18224	4.23715	0.432914	0.02665	3.31611
GOTERM_CC_DIRECT	GO:0016324~apical plasma membrane	7	7.95455	0.00269537	CAV1, ADRB2, CD34, P2RY1, ANXA1, ABCB1, PTEN	88	291	18224	4.98157	0.437233	0.0257929	3.36005
GOTERM_CC_DIRECT	GO:0005887~integral component of plasma membrane	16	18.1818	0.00269739	OPRM1, CAV1, TNF, DRD2, IGF1R, AGTR1, ADRB2, ADRB1, GRIN2B, CD34, CHRM1, CX3CR1, P2RY1, ADRA2A, NGFR, HTR2A	88	1415	18224	2.34166	0.437475	0.0247036	3.36252
GOTERM_CC_DIRECT	GO:0048471~perinuclear region of cytoplasm	10	11.3636	0.00281861	CAV1, BDNF, NOS1, CD34, PPARG, CX3CR1, NOS2, PRKCD, SRC, CTNNB1	88	621	18224	3.3348	0.451853	0.0247393	3.51116
GOTERM_CC_DIRECT	GO:0030141~secretory granule	4	4.54545	0.00533625	CDC42, AVP, IL1B, MPO	88	74	18224	11.1941	0.680074	0.0445631	6.55102
GOTERM_CC_DIRECT	GO:0072562~blood microparticle	5	5.68182	0.00606003	ACTB, AGT, F2, TGFB1, PLG	88	152	18224	6.8122	0.726023	0.0485771	7.40846
GOTERM_CC_DIRECT	GO:0034704~calcium channel complex	3	3.40909	0.00629338	CALM3, PRKACA, CALM1	88	25	18224	24.8509	0.739389	0.0485848	7.68336
GOTERM_CC_DIRECT	GO:0005719~nuclear euchromatin	3	3.40909	0.00731791	JUN, SIRT1, CTNNB1	88	27	18224	23.0101	0.790796	0.0543409	8.88142
GOTERM_CC_DIRECT	GO:0042383~sarcolemma	4	4.54545	0.00783116	OPRM1, VCAM1, NOS1, ANXA1	88	85	18224	9.74545	0.812617	0.0561093	9.4762
GOTERM_CC_DIRECT	GO:0005622~intracellular	14	15.9091	0.0103217	CSF2, CAV1, DRD2, SMAD4, SMAD3, PRKCD, CDC42, MAPK1, AGTR1, GRIN2B, MAPK14, MAPK3, PIK3CA, NOS2	88	1332	18224	2.17663	0.890294	0.0710172	12.312
GOTERM_CC_DIRECT	GO:0016323~basolateral plasma membrane	5	5.68182	0.0108481	CAV1, P2RY1, ADRA2A, ANXA1, CTNNB1	88	180	18224	5.75253	0.902048	0.072205	12.9008
GOTERM_CC_DIRECT	GO:0000922~spindle pole	4	4.54545	0.015341	MAPK14, CALM3, CTNNB1, CALM1	88	109	18224	7.59967	0.962856	0.097787	17.7799
GOTERM_CC_DIRECT	GO:0043025~neuronal cell body	6	6.81818	0.0174604	CALCA, CDC42, TAC1, NQO1, TGFB1, HTR2A	88	315	18224	3.94459	0.976527	0.107469	19.993
GOTERM_CC_DIRECT	GO:0009897~external side of plasma membrane	5	5.68182	0.0190088	IL4, VCAM1, ACE, TNF, CD34	88	213	18224	4.86129	0.983225	0.113284	21.5751
GOTERM_CC_DIRECT	GO:0030424~axon	5	5.68182	0.0217498	MAPK1, DRD2, TAC1, TGFB1, HTR2A	88	222	18224	4.66421	0.990756	0.125256	24.3051
GOTERM_CC_DIRECT	GO:0030425~dendrite	6	6.81818	0.0221175	AVP, DRD2, CHRM1, P2RY1, TH, HTR2A	88	335	18224	3.70909	0.991468	0.123949	24.6647
GOTERM_CC_DIRECT	GO:0005768~endosome	5	5.68182	0.0227145	ACE, CAV1, ADRB2, ANXA1, NGFR	88	225	18224	4.60202	0.992509	0.123896	25.245
GOTERM_CC_DIRECT	GO:0031982~vesicle	4	4.54545	0.0233928	AKT1, ANXA1, CALM3, CALM1	88	128	18224	6.47159	0.993538	0.124256	25.8994
GOTERM_CC_DIRECT	GO:0033256~I-kappaB/NF-kappaB complex	2	2.27273	0.0236454	RELA, NFKB1	88	5	18224	82.8364	0.993885	0.122511	26.1417
GOTERM_CC_DIRECT	GO:0005769~early endosome	5	5.68182	0.024041	VCAM1, MAPK1, ADRB2, ADRB1, MAPK3	88	229	18224	4.52164	0.994391	0.121538	26.5198
GOTERM_CC_DIRECT	GO:0016328~lateral plasma membrane	3	3.40909	0.0265234	DRD2, ANXA1, CTNNB1	88	53	18224	11.7221	0.996739	0.13034	28.8517
GOTERM_CC_DIRECT	GO:0031093~platelet alpha granule lumen	3	3.40909	0.0284086	SERPINE1, TGFB1, PLG	88	55	18224	11.2959	0.997842	0.135979	30.5769
GOTERM_CC_DIRECT	GO:0005856~cytoskeleton	6	6.81818	0.0323998	ACTB, MAPK1, NOS1, MAPK3, CASP8, NOS3	88	371	18224	3.34918	0.999102	0.150536	34.103
GOTERM_CC_DIRECT	GO:0031264~death-inducing signaling complex	2	2.27273	0.032948	CASP3, CASP8	88	7	18224	59.1688	0.999204	0.149716	34.5742
GOTERM_CC_DIRECT	GO:0005815~microtubule organizing center	4	4.54545	0.0368683	CDC42, MAPK1, CASP8, NR3C1	88	153	18224	5.41414	0.999665	0.162897	37.8545
GOTERM_CC_DIRECT	GO:0031232~extrinsic component of external side of plasma membrane	2	2.27273	0.0375664	ANXA1, PLG	88	8	18224	51.7727	0.999713	0.162472	38.4225
GOTERM_CC_DIRECT	GO:0071141~SMAD protein complex	2	2.27273	0.0375664	SMAD4, SMAD3	88	8	18224	51.7727	0.999713	0.162472	38.4225
GOTERM_CC_DIRECT	GO:0005635~nuclear envelope	4	4.54545	0.0405838	SREBF1, MAPK3, PARP1, SIRT1	88	159	18224	5.20983	0.999853	0.171185	40.823
GOTERM_CC_DIRECT	GO:0005783~endoplasmic reticulum	9	10.2273	0.0439366	OPRM1, VCAM1, SREBF1, FOS, CAV1, PTGS2, TP53, PRKCD, ADIPOQ	88	828	18224	2.25099	0.99993	0.180763	43.389
GOTERM_CC_DIRECT	GO:0005911~cell-cell junction	4	4.54545	0.0492573	AKT1, CDC42, PRKCD, CTNNB1	88	172	18224	4.81607	0.999979	0.197138	47.2517
GOTERM_CC_DIRECT	GO:0045177~apical part of cell	3	3.40909	0.0499506	VCAM1, CDC42, CTNNB1	88	75	18224	8.28364	0.999982	0.196106	47.7367
GOTERM_CC_DIRECT	GO:0031514~motile cilium	3	3.40909	0.0511452	HIF1A, ANXA1, PRKACA	88	76	18224	8.17464	0.999986	0.196889	48.5628
GOTERM_CC_DIRECT	GO:0014069~postsynaptic density	4	4.54545	0.0580018	DRD2, CHRM1, P2RY1, SRC	88	184	18224	4.50198	0.999997	0.217102	53.0762
GOTERM_CC_DIRECT	GO:0005942~phosphatidylinositol 3-kinase complex	2	2.27273	0.0648225	PIK3CA, PIK3R3	88	14	18224	29.5844	0.999999	0.236117	57.2016
GOTERM_CC_DIRECT	GO:0031143~pseudopodium	2	2.27273	0.078163	MAPK1, MAPK3	88	17	18224	24.3636	1	0.274596	64.3212
GOTERM_CC_DIRECT	GO:0016605~PML body	3	3.40909	0.0798143	TP53, PTEN, SIRT1	88	98	18224	6.33952	1	0.275398	65.1221
GOTERM_CC_DIRECT	GO:0045211~postsynaptic membrane	4	4.54545	0.080129	GRIN2B, CHRM1, P2RY1, PTEN	88	211	18224	3.92589	1	0.272165	65.2728
GOTERM_CC_DIRECT	GO:0032839~dendrite cytoplasm	2	2.27273	0.0825679	OPRM1, MAPK1	88	18	18224	23.0101	1	0.275323	66.4209
GOTERM_CC_DIRECT	GO:0043197~dendritic spine	3	3.40909	0.0826243	NOS1, DRD2, PTEN	88	100	18224	6.21273	1	0.271452	66.447
GOTERM_CC_DIRECT	GO:0001891~phagocytic cup	2	2.27273	0.086952	TNF, ANXA1	88	19	18224	21.799	1	0.279929	68.3972
GOTERM_CC_DIRECT	GO:0016020~membrane	16	18.1818	0.0976138	ACTB, CAV1, TNF, ESR1, ABCB1, PRKCD, CTNNB1, VCAM1, CDC42, IGF1R, FOS, ACE, CHRM1, PRKACA, PARP1, SMARCA4	88	2200	18224	1.50612	1	0.305546	72.7649
GOTERM_CC_DIRECT	GO:0030863~cortical cytoskeleton	2	2.27273	0.0999804	ACTB, NOS2	88	22	18224	18.8264	1	0.30776	73.6557
GOTERM_CC_DIRECT	GO:0098794~postsynapse	2	2.27273	0.0999804	OPRM1, AKT1	88	22	18224	18.8264	1	0.30776	73.6557
