# Supplementary material for: A Network Pharmacology Approach to Investigate the Active Compounds and Mechanisms of Musk for Ischemic Stroke
Source: Evid Based Complement Alternat Med. 2020 Jul 3;2020:4063180. doi: 10.1155/2020/4063180 (PMC7354650; doi:10.1155/2020/4063180)
Supplement: Supplementary Materials — The detailed information of chemical composition and predicted target of musk (S1), ischemic stroke target (S2), string data (S3), compound target analysis data (S4), Gene Ontology enrichment analysis results (S5, S6, and S7), and KEGG enrichment analysis results (S8 and S9) used to support the findings of this study is included within the supplementary information files. [file 4063180.f1.zip › 4063180.f1/S7.DAVID Core Gene GO MF.xls]

## Sheet: Sheet1
Category	Term	Count	%	PValue	Genes	List Total	Pop Hits	Pop Total	Fold Enrichment	Bonferroni	Benjamini	FDR
GOTERM_MF_DIRECT	GO:0008134~transcription factor binding	19	21.5909	4.57027e-15	PPARA, AR, RELA, PPARG, TP53, ESR1, SMAD3, NFKB1, SIRT1, STAT3, CTNNB1, MAPK1, FOS, HIF1A, SP1, CD34, JUN, PARP1, SMARCA4	88	284	16881	12.8337	1.83442e-12	1.83442e-12	6.35048e-12
GOTERM_MF_DIRECT	GO:0019899~enzyme binding	19	21.5909	7.25407e-14	AR, CAV1, PTGS2, TH, PPARG, TP53, ESR1, ESR2, PRKCD, SIRT1, PTEN, TGFB1, SRC, CTNNB1, AKT1, HIF1A, JUN, MAPK14, PARP1	88	333	16881	10.9452	2.92165e-11	1.46083e-11	1.0123e-10
GOTERM_MF_DIRECT	GO:0042802~identical protein binding	24	27.2727	2.39097e-12	ACTB, CAV1, TNF, DRD2, RELA, PPARG, TP53, SMAD4, ESR1, SMAD3, NFKB1, ADIPOQ, SIRT1, PTEN, STAT3, AKT1, CALCA, CDC42, IGF1R, MAPK1, JUN, CASP8, NQO1, PARP1	88	749	16881	6.14674	9.63563e-10	3.21188e-10	3.33857e-09
GOTERM_MF_DIRECT	GO:0005515~protein binding	77	87.5	2.52501e-12	OPRM1, PPARA, PTGS2, CRP, PPARG, EDN1, NFKB1, PTEN, IL10, SHH, TGFB1, CTNNB1, AKT1, CDC42, FOS, AGTR1, CASP3, GRIN2B, CASP8, SERPINE1, PIK3CA, NOS3, PRKACA, NOS2, NQO1, AR, SGK1, RELA, TP53, ESR1, ESR2, PRKCD, MAPK1, ADRB2, HIF1A, ADRB1, JUN, F2, CX3CR1, MAPK3, NGFR, SMARCA4, CSF2, CAV1, TNF, DRD2, TH, NR3C2, NR3C1, SRC, CALCA, IGF1R, VDR, AGT, P2RY1, ADRA2A, HSPA4, PIK3R3, SREBF1, IL4, ACTB, NOS…	88	8785	16881	1.68137	1.01757e-09	2.54392e-10	3.52569e-09
GOTERM_MF_DIRECT	GO:0019901~protein kinase binding	16	18.1818	7.653e-10	SREBF1, CAV1, RELA, TP53, SMAD3, PTEN, PRKCD, STAT3, CTNNB1, CDC42, HIF1A, ADRA2A, CALM3, PRKACA, PARP1, CALM1	88	376	16881	8.16296	3.08416e-07	6.16832e-08	1.06861e-06
GOTERM_MF_DIRECT	GO:0044212~transcription regulatory region DNA binding	13	14.7727	9.23072e-10	FOS, AR, TNF, SP1, RELA, JUN, PPARG, TP53, SMAD4, SMAD3, NFKB1, STAT3, CTNNB1	88	213	16881	11.7079	3.71998e-07	6.19996e-08	1.28891e-06
GOTERM_MF_DIRECT	GO:0046982~protein heterodimerization activity	16	18.1818	1.36188e-08	CAV1, DRD2, RELA, TP53, SMAD4, SMAD3, NFKB1, TGFB1, CTNNB1, FOS, AGTR1, HIF1A, ADRB1, JUN, P2RY1, ADRA2A	88	465	16881	6.60059	5.48835e-06	7.84052e-07	1.90162e-05
GOTERM_MF_DIRECT	GO:0003707~steroid hormone receptor activity	8	9.09091	1.42806e-08	VDR, PPARA, AR, PPARG, NR3C2, ESR1, NR3C1, ESR2	88	56	16881	27.4042	5.75507e-06	7.19386e-07	1.99403e-05
GOTERM_MF_DIRECT	GO:0005102~receptor binding	14	15.9091	2.9761e-08	AR, AVP, CAV1, ANXA1, TAC1, ADIPOQ, SRC, PLG, CALCA, REN, SERPINE1, F2, CRH, NOS2	88	353	16881	7.60797	1.19936e-05	1.33263e-06	4.1556e-05
GOTERM_MF_DIRECT	GO:0000978~RNA polymerase II core promoter proximal region sequence-specific DNA binding	14	15.9091	3.18064e-08	ACTB, SREBF1, PPARA, AR, RELA, ESR1, SMAD4, SMAD3, NR3C1, STAT3, FOS, SP1, JUN, SMARCA4	88	355	16881	7.56511	1.28179e-05	1.2818e-06	4.4412e-05
GOTERM_MF_DIRECT	GO:0003700~transcription factor activity, sequence-specific DNA binding	20	22.7273	3.29054e-07	SREBF1, PPARA, AR, RELA, PPARG, NR3C2, TP53, SMAD4, ESR1, SMAD3, NFKB1, NR3C1, ESR2, STAT3, CTNNB1, VDR, FOS, HIF1A, SP1, JUN	88	961	16881	3.99229	0.0001326	1.20553e-05	0.000459465
GOTERM_MF_DIRECT	GO:0001077~transcriptional activator activity, RNA polymerase II core promoter proximal region sequence-specific binding	11	12.5	3.67786e-07	SREBF1, PPARA, FOS, AR, HIF1A, RELA, JUN, SMAD4, ESR1, NR3C1, STAT3	88	236	16881	8.94121	0.000148207	1.23514e-05	0.000513546
GOTERM_MF_DIRECT	GO:0043565~sequence-specific DNA binding	15	17.0455	3.8152e-07	PPARA, AR, PPARG, NR3C2, ESR1, SMAD4, TP53, SMAD3, NR3C1, ESR2, VDR, FOS, HIF1A, SP1, JUN	88	518	16881	5.55491	0.000153741	1.18271e-05	0.000532724
GOTERM_MF_DIRECT	GO:0034617~tetrahydrobiopterin binding	4	4.54545	5.26933e-07	NOS1, TH, NOS3, NOS2	88	4	16881	191.83	0.000212331	1.5168e-05	0.000735766
GOTERM_MF_DIRECT	GO:0004879~RNA polymerase II transcription factor activity, ligand-activated sequence-specific DNA binding	6	6.81818	1.07603e-06	PPARA, AR, PPARG, ESR1, ESR2, STAT3	88	36	16881	31.9716	0.000433544	2.89088e-05	0.00150247
GOTERM_MF_DIRECT	GO:0001046~core promoter sequence-specific DNA binding	6	6.81818	2.67072e-06	SP1, PPARG, TP53, ESR1, ESR2, SIRT1	88	43	16881	26.7669	0.00107572	6.72667e-05	0.00372913
GOTERM_MF_DIRECT	GO:0070412~R-SMAD binding	5	5.68182	3.68353e-06	FOS, JUN, SMAD4, SMAD3, PARP1	88	21	16881	45.6737	0.00148336	8.73177e-05	0.00514327
GOTERM_MF_DIRECT	GO:0097110~scaffold protein binding	6	6.81818	4.65563e-06	NOS1, MAPK3, CASP8, P2RY1, NOS3, SRC	88	48	16881	23.9787	0.00187446	0.000104229	0.00650056
GOTERM_MF_DIRECT	GO:0030235~nitric-oxide synthase regulator activity	4	4.54545	7.26758e-06	AKT1, ESR1, CALM3, CALM1	88	8	16881	95.9148	0.00292456	0.000154138	0.0101474
GOTERM_MF_DIRECT	GO:0005496~steroid binding	5	5.68182	1.05494e-05	AR, NR3C2, ESR1, NR3C1, ESR2	88	27	16881	35.524	0.00424241	0.000212549	0.0147294
GOTERM_MF_DIRECT	GO:0032403~protein complex binding	9	10.2273	1.09856e-05	CALCA, SREBF1, PPARA, CASP3, RELA, CASP8, NR3C1, ATM, HTR2A	88	206	16881	8.3809	0.00441743	0.000210797	0.0153383
GOTERM_MF_DIRECT	GO:0003682~chromatin binding	11	12.5	3.24048e-05	SREBF1, FOS, AR, RELA, JUN, PPARG, TP53, SMAD4, ESR1, MPO, NFKB1	88	391	16881	5.39674	0.0129744	0.00059343	0.045238
GOTERM_MF_DIRECT	GO:0005125~cytokine activity	8	9.09091	3.44242e-05	IL4, CSF2, TNF, EDN1, IL1B, ADIPOQ, TGFB1, IL10	88	176	16881	8.71952	0.0137774	0.000603	0.0480565
GOTERM_MF_DIRECT	GO:0008144~drug binding	6	6.81818	4.48572e-05	PPARA, ACE, DRD2, CHRM1, PPARG, HTR2A	88	76	16881	15.1444	0.0179154	0.00075296	0.0626169
GOTERM_MF_DIRECT	GO:0031996~thioesterase binding	4	4.54545	4.61927e-05	CDC42, ADRA2A, CALM3, CALM1	88	14	16881	54.8084	0.0184439	0.000744367	0.0644806
GOTERM_MF_DIRECT	GO:0004517~nitric-oxide synthase activity	3	3.40909	7.85069e-05	NOS1, NOS3, NOS2	88	3	16881	191.83	0.0311442	0.00121616	0.109565
GOTERM_MF_DIRECT	GO:0042803~protein homodimerization activity	14	15.9091	8.85141e-05	PTGS2, DRD2, RELA, SMAD4, ANXA1, SMAD3, NFKB1, ADIPOQ, TGFB1, ADRB2, SP1, JUN, ADRA2A, NOS2	88	730	16881	3.67892	0.035044	0.00132034	0.123523
GOTERM_MF_DIRECT	GO:0047485~protein N-terminus binding	6	6.81818	0.000143766	RELA, TP53, PARP1, TGFB1, ATM, SMARCA4	88	97	16881	11.8657	0.056295	0.00206721	0.200556
GOTERM_MF_DIRECT	GO:0051380~norepinephrine binding	3	3.40909	0.000156487	ADRB2, ADRB1, ADRA2A	88	4	16881	143.872	0.0611215	0.00217244	0.218285
GOTERM_MF_DIRECT	GO:0008083~growth factor activity	7	7.95455	0.000189326	IL4, CSF2, BDNF, AGT, F2, TGFB1, IL10	88	162	16881	8.28893	0.0734669	0.00254029	0.264036
GOTERM_MF_DIRECT	GO:0016301~kinase activity	8	9.09091	0.000245358	AKT1, MAPK1, MAPK3, CALM3, PIK3CA, PIK3R3, SRC, CALM1	88	241	16881	6.36779	0.0941588	0.00318496	0.342054
GOTERM_MF_DIRECT	GO:0044325~ion channel binding	6	6.81818	0.000293578	CAV1, NOS1, CALM3, SRC, CTNNB1, CALM1	88	113	16881	10.1856	0.111597	0.00369096	0.409151
GOTERM_MF_DIRECT	GO:0019903~protein phosphatase binding	5	5.68182	0.000310898	MAPK14, PPARG, TP53, STAT3, CTNNB1	88	63	16881	15.2246	0.117778	0.00379011	0.43324
GOTERM_MF_DIRECT	GO:0000980~RNA polymerase II distal enhancer sequence-specific DNA binding	5	5.68182	0.000350615	ACTB, RELA, JUN, NFKB1, SMARCA4	88	65	16881	14.7561	0.131791	0.00414792	0.488461
GOTERM_MF_DIRECT	GO:0051379~epinephrine binding	3	3.40909	0.000388597	ADRB2, ADRB1, ADRA2A	88	6	16881	95.9148	0.144984	0.00446529	0.541243
GOTERM_MF_DIRECT	GO:0034618~arginine binding	3	3.40909	0.000542212	NOS1, NOS3, NOS2	88	7	16881	82.2127	0.196333	0.00605302	0.754448
GOTERM_MF_DIRECT	GO:0020037~heme binding	6	6.81818	0.000709436	NOS1, PTGS2, MPO, NOS3, NOS2, SRC	88	137	16881	8.40129	0.248741	0.00770005	0.98606
GOTERM_MF_DIRECT	GO:0004674~protein serine/threonine kinase activity	9	10.2273	0.000709923	AKT1, MAPK1, SGK1, MAPK14, MAPK3, PIK3CA, PRKACA, PRKCD, ATM	88	376	16881	4.59166	0.248888	0.0075033	0.986733
GOTERM_MF_DIRECT	GO:0019904~protein domain specific binding	7	7.95455	0.000717522	OPRM1, PPARA, TH, CALM3, IL1B, PLG, CALM1	88	208	16881	6.4558	0.251187	0.00738962	0.997247
GOTERM_MF_DIRECT	GO:0003677~DNA binding	20	22.7273	0.000743574	SREBF1, PPARA, AR, RELA, PPARG, TP53, SMAD4, ESR1, SMAD3, NFKB1, NR3C1, ESR2, STAT3, ATM, VDR, MAPK1, FOS, SP1, JUN, PARP1	88	1674	16881	2.29187	0.259013	0.00746628	1.03328
GOTERM_MF_DIRECT	GO:0030331~estrogen receptor binding	4	4.54545	0.000905124	PPARG, PARP1, SRC, CTNNB1	88	37	16881	20.7383	0.305755	0.00886124	1.25646
GOTERM_MF_DIRECT	GO:0043560~insulin receptor substrate binding	3	3.40909	0.00140115	IGF1R, PIK3CA, PRKCD	88	11	16881	52.3171	0.431674	0.0133637	1.93879
GOTERM_MF_DIRECT	GO:0005179~hormone activity	5	5.68182	0.0014101	CALCA, AGT, EDN1, CRH, ADIPOQ	88	94	16881	10.2037	0.433723	0.0131379	1.95106
GOTERM_MF_DIRECT	GO:0019902~phosphatase binding	4	4.54545	0.00160464	MAPK1, PPARA, MAPK3, SMAD3	88	45	16881	17.0515	0.476485	0.0146012	2.21744
GOTERM_MF_DIRECT	GO:0001085~RNA polymerase II transcription factor binding	4	4.54545	0.00182009	AR, TP53, SMAD4, CTNNB1	88	47	16881	16.3259	0.520094	0.0161824	2.51167
GOTERM_MF_DIRECT	GO:0004707~MAP kinase activity	3	3.40909	0.00229509	MAPK1, MAPK14, MAPK3	88	14	16881	41.1063	0.603858	0.0199288	3.15744
GOTERM_MF_DIRECT	GO:0010181~FMN binding	3	3.40909	0.00263933	NOS1, NOS3, NOS2	88	15	16881	38.3659	0.655291	0.0224059	3.62297
GOTERM_MF_DIRECT	GO:0005088~Ras guanyl-nucleotide exchange factor activity	5	5.68182	0.00294581	CSF2, ADRB1, GRIN2B, CALM3, CALM1	88	115	16881	8.34042	0.695448	0.0244648	4.03568
GOTERM_MF_DIRECT	GO:0031625~ubiquitin protein ligase binding	7	7.95455	0.00366101	HIF1A, RELA, CASP8, TP53, SMAD3, PRKACA, NGFR	88	287	16881	4.67877	0.771928	0.0297147	4.9924
GOTERM_MF_DIRECT	GO:0005524~ATP binding	17	19.3182	0.00375055	ACTB, SGK1, TP53, ABCB1, PRKCD, ATM, SRC, AKT1, IGF1R, MAPK1, MAPK14, MAPK3, P2RY1, PIK3CA, HSPA4, PRKACA, SMARCA4	88	1495	16881	2.18134	0.780041	0.0298322	5.11155
GOTERM_MF_DIRECT	GO:0043539~protein serine/threonine kinase activator activity	3	3.40909	0.00380748	CALM3, TGFB1, CALM1	88	18	16881	31.9716	0.785048	0.0296942	5.18723
GOTERM_MF_DIRECT	GO:0000977~RNA polymerase II regulatory region sequence-specific DNA binding	6	6.81818	0.00441706	SP1, RELA, TP53, SMAD4, SMAD3, NFKB1	88	208	16881	5.53354	0.832038	0.0337262	5.99413
GOTERM_MF_DIRECT	GO:0035257~nuclear hormone receptor binding	3	3.40909	0.00567224	HIF1A, SIRT1, CTNNB1	88	22	16881	26.1586	0.898978	0.0423312	7.63557
GOTERM_MF_DIRECT	GO:0043425~bHLH transcription factor binding	3	3.40909	0.00619176	SP1, SMAD3, SIRT1	88	23	16881	25.0212	0.918164	0.0452946	8.30714
GOTERM_MF_DIRECT	GO:0000982~transcription factor activity, RNA polymerase II core promoter proximal region sequence-specific binding	3	3.40909	0.00619176	FOS, SP1, JUN	88	23	16881	25.0212	0.918164	0.0452946	8.30714
GOTERM_MF_DIRECT	GO:0008270~zinc ion binding	14	15.9091	0.00668506	PPARA, AR, PPARG, NR3C2, ESR1, TP53, SMAD3, NR3C1, ESR2, SHH, VDR, ACE, GRIN2B, PARP1	88	1169	16881	2.29736	0.933004	0.0479595	8.94062
GOTERM_MF_DIRECT	GO:0001103~RNA polymerase II repressing transcription factor binding	3	3.40909	0.00847635	PPARA, SP1, STAT3	88	27	16881	21.3144	0.96763	0.0594208	11.2069
GOTERM_MF_DIRECT	GO:0035035~histone acetyltransferase binding	3	3.40909	0.00909802	HIF1A, SP1, TP53	88	28	16881	20.5532	0.97486	0.0625755	11.9811
GOTERM_MF_DIRECT	GO:0004712~protein serine/threonine/tyrosine kinase activity	3	3.40909	0.00973947	AKT1, SGK1, PRKACA	88	29	16881	19.8444	0.980634	0.0657435	12.7734
GOTERM_MF_DIRECT	GO:0038052~RNA polymerase II transcription factor activity, estrogen-activated sequence-specific DNA binding	2	2.27273	0.0102812	ESR1, ESR2	88	2	16881	191.83	0.984467	0.0681554	13.4373
GOTERM_MF_DIRECT	GO:0031711~bradykinin receptor binding	2	2.27273	0.0102812	AGTR1, ACE	88	2	16881	191.83	0.984467	0.0681554	13.4373
GOTERM_MF_DIRECT	GO:0008233~peptidase activity	4	4.54545	0.0112529	CASP3, REN, CASP8, SHH	88	90	16881	8.52576	0.989544	0.0731933	14.6165
GOTERM_MF_DIRECT	GO:0017080~sodium channel regulator activity	3	3.40909	0.0117803	SGK1, NOS1, AGT	88	32	16881	17.984	0.991567	0.0753031	15.2503
GOTERM_MF_DIRECT	GO:0001228~transcriptional activator activity, RNA polymerase II transcription regulatory region sequence-specific binding	4	4.54545	0.0130172	HIF1A, TP53, SMAD4, STAT3	88	95	16881	8.07703	0.994909	0.0816413	16.7195
GOTERM_MF_DIRECT	GO:0050661~NADP binding	3	3.40909	0.0139914	NOS1, NOS3, NOS2	88	35	16881	16.4425	0.996581	0.0861901	17.86
GOTERM_MF_DIRECT	GO:0008022~protein C-terminus binding	5	5.68182	0.0145413	OPRM1, SP1, SIRT1, SRC, CTNNB1	88	182	16881	5.27004	0.997269	0.0881108	18.4973
GOTERM_MF_DIRECT	GO:0002020~protease binding	4	4.54545	0.0153318	CASP3, TNF, SERPINE1, TP53	88	101	16881	7.59721	0.998024	0.0913482	19.4055
GOTERM_MF_DIRECT	GO:0031997~N-terminal myristoylation domain binding	2	2.27273	0.0153825	CALM3, CALM1	88	3	16881	127.886	0.998064	0.0903147	19.4634
GOTERM_MF_DIRECT	GO:0042826~histone deacetylase binding	4	4.54545	0.0157387	HIF1A, SP1, RELA, PARP1	88	102	16881	7.52273	0.998327	0.0910087	19.8692
GOTERM_MF_DIRECT	GO:0001102~RNA polymerase II activating transcription factor binding	3	3.40909	0.0163673	JUN, SMAD3, CTNNB1	88	38	16881	15.1444	0.998707	0.0931722	20.5809
GOTERM_MF_DIRECT	GO:0015459~potassium channel regulator activity	3	3.40909	0.01804	SGK1, ADRB2, DRD2	88	40	16881	14.3872	0.999349	0.100868	22.446
GOTERM_MF_DIRECT	GO:0034056~estrogen response element binding	2	2.27273	0.0204579	ESR1, ESR2	88	4	16881	95.9148	0.999759	0.112193	25.0703
GOTERM_MF_DIRECT	GO:0016303~1-phosphatidylinositol-3-kinase activity	3	3.40909	0.0206782	PIK3CA, PIK3R3, ATM	88	43	16881	13.3835	0.99978	0.111838	25.3053
GOTERM_MF_DIRECT	GO:0030284~estrogen receptor activity	2	2.27273	0.0255074	ESR1, ESR2	88	5	16881	76.7318	0.99997	0.134651	30.2872
GOTERM_MF_DIRECT	GO:0000988~transcription factor activity, protein binding	2	2.27273	0.0255074	SMAD4, SMAD3	88	5	16881	76.7318	0.99997	0.134651	30.2872
GOTERM_MF_DIRECT	GO:0051525~NFAT protein binding	2	2.27273	0.0255074	PPARA, MAPK14	88	5	16881	76.7318	0.99997	0.134651	30.2872
GOTERM_MF_DIRECT	GO:0072542~protein phosphatase activator activity	2	2.27273	0.0305311	CALM3, CALM1	88	6	16881	63.9432	0.999996	0.157326	35.1411
GOTERM_MF_DIRECT	GO:0046870~cadmium ion binding	2	2.27273	0.0305311	NOS1, NOS3	88	6	16881	63.9432	0.999996	0.157326	35.1411
GOTERM_MF_DIRECT	GO:0031490~chromatin DNA binding	3	3.40909	0.0360244	RELA, SMAD3, STAT3	88	58	16881	9.92222	1	0.181112	40.0884
GOTERM_MF_DIRECT	GO:0005113~patched binding	2	2.27273	0.0405019	CAV1, SHH	88	8	16881	47.9574	1	0.199213	43.8593
GOTERM_MF_DIRECT	GO:0046983~protein dimerization activity	4	4.54545	0.0424347	SREBF1, AR, ATM, STAT3	88	150	16881	5.11545	1	0.20541	45.4179
GOTERM_MF_DIRECT	GO:0050660~flavin adenine dinucleotide binding	3	3.40909	0.0430775	NOS1, NOS3, NOS2	88	64	16881	8.99201	1	0.20583	45.9273
GOTERM_MF_DIRECT	GO:0030957~Tat protein binding	2	2.27273	0.0454493	ACTB, SMARCA4	88	9	16881	42.6288	1	0.213628	47.7689
GOTERM_MF_DIRECT	GO:0003705~transcription factor activity, RNA polymerase II distal enhancer sequence-specific binding	3	3.40909	0.0455341	HIF1A, RELA, JUN	88	66	16881	8.71952	1	0.211589	47.8337
GOTERM_MF_DIRECT	GO:0002039~p53 binding	3	3.40909	0.0467815	TP53, SIRT1, SMARCA4	88	67	16881	8.58938	1	0.214435	48.7776
GOTERM_MF_DIRECT	GO:0035240~dopamine binding	2	2.27273	0.0503714	DRD2, TH	88	10	16881	38.3659	1	0.226744	51.4065
GOTERM_MF_DIRECT	GO:0042805~actinin binding	2	2.27273	0.0503714	RELA, NFKB1	88	10	16881	38.3659	1	0.226744	51.4065
GOTERM_MF_DIRECT	GO:0008440~inositol-1,4,5-trisphosphate 3-kinase activity	2	2.27273	0.0503714	CALM3, CALM1	88	10	16881	38.3659	1	0.226744	51.4065
GOTERM_MF_DIRECT	GO:0070411~I-SMAD binding	2	2.27273	0.0552684	SMAD4, CTNNB1	88	11	16881	34.8781	1	0.243777	54.7909
GOTERM_MF_DIRECT	GO:0051117~ATPase binding	3	3.40909	0.0558544	AR, CAV1, ESR1	88	74	16881	7.77687	1	0.243509	55.1809
GOTERM_MF_DIRECT	GO:0019900~kinase binding	3	3.40909	0.0571974	PRKCD, SRC, CTNNB1	88	75	16881	7.67318	1	0.246158	56.0629
GOTERM_MF_DIRECT	GO:0000983~transcription factor activity, RNA polymerase II core promoter sequence-specific	2	2.27273	0.0601405	RELA, SMAD3	88	12	16881	31.9716	1	0.254776	57.9397
GOTERM_MF_DIRECT	GO:0097153~cysteine-type endopeptidase activity involved in apoptotic process	2	2.27273	0.0649877	CASP3, CASP8	88	13	16881	29.5122	1	0.270125	60.8695
GOTERM_MF_DIRECT	GO:0001784~phosphotyrosine binding	2	2.27273	0.0649877	MAPK1, MAPK3	88	13	16881	29.5122	1	0.270125	60.8695
GOTERM_MF_DIRECT	GO:0003690~double-stranded DNA binding	3	3.40909	0.0654868	SP1, TP53, CTNNB1	88	81	16881	7.1048	1	0.269288	61.1601
GOTERM_MF_DIRECT	GO:0008013~beta-catenin binding	3	3.40909	0.0669056	AR, ESR1, SMAD3	88	82	16881	7.01815	1	0.271763	61.9755
GOTERM_MF_DIRECT	GO:0001076~transcription factor activity, RNA polymerase II transcription factor binding	2	2.27273	0.0698102	HIF1A, SMAD4	88	14	16881	27.4042	1	0.279408	63.5953
GOTERM_MF_DIRECT	GO:0031432~titin binding	2	2.27273	0.0698102	CALM3, CALM1	88	14	16881	27.4042	1	0.279408	63.5953
GOTERM_MF_DIRECT	GO:0050998~nitric-oxide synthase binding	2	2.27273	0.0698102	ACTB, CAV1	88	14	16881	27.4042	1	0.279408	63.5953
GOTERM_MF_DIRECT	GO:0046965~retinoid X receptor binding	2	2.27273	0.0746081	VDR, PPARG	88	15	16881	25.5773	1	0.293334	66.1313
GOTERM_MF_DIRECT	GO:0005123~death receptor binding	2	2.27273	0.0793816	CASP3, CASP8	88	16	16881	23.9787	1	0.306695	68.4909
GOTERM_MF_DIRECT	GO:0001190~transcriptional activator activity, RNA polymerase II transcription factor binding	2	2.27273	0.0793816	PPARA, JUN	88	16	16881	23.9787	1	0.306695	68.4909
GOTERM_MF_DIRECT	GO:0031435~mitogen-activated protein kinase kinase kinase binding	2	2.27273	0.0841307	CDC42, MAPK1	88	17	16881	22.5682	1	0.319522	70.6862
GOTERM_MF_DIRECT	GO:0004871~signal transducer activity	4	4.54545	0.0883888	AVP, NGFR, STAT3, CTNNB1	88	204	16881	3.76136	1	0.330359	72.5329
GOTERM_MF_DIRECT	GO:0043274~phospholipase binding	2	2.27273	0.0888556	CALM3, CALM1	88	18	16881	21.3144	1	0.328972	72.7286
GOTERM_MF_DIRECT	GO:0051019~mitogen-activated protein kinase binding	2	2.27273	0.0888556	ACE, SIRT1	88	18	16881	21.3144	1	0.328972	72.7286
GOTERM_MF_DIRECT	GO:0071837~HMG box domain binding	2	2.27273	0.0888556	SP1, JUN	88	18	16881	21.3144	1	0.328972	72.7286
GOTERM_MF_DIRECT	GO:0001965~G-protein alpha-subunit binding	2	2.27273	0.0935564	OPRM1, HTR2A	88	19	16881	20.1926	1	0.340773	74.6289
