# Supplementary material for: A Network Pharmacology Approach to Investigate the Active Compounds and Mechanisms of Musk for Ischemic Stroke
Source: Evid Based Complement Alternat Med. 2020 Jul 3;2020:4063180. doi: 10.1155/2020/4063180 (PMC7354650; doi:10.1155/2020/4063180)
Supplement: Supplementary Materials — The detailed information of chemical composition and predicted target of musk (S1), ischemic stroke target (S2), string data (S3), compound target analysis data (S4), Gene Ontology enrichment analysis results (S5, S6, and S7), and KEGG enrichment analysis results (S8 and S9) used to support the findings of this study is included within the supplementary information files. [file 4063180.f1.zip › 4063180.f1/S8.DAVID-KEGG.xls]

## Sheet: Sheet1
Category	Term	Count	Gene ratio	PValue	Genes	List Total	Pop Hits	Pop Total	Fold Enrichment	Bonferroni	Benjamini	FDR
KEGG_PATHWAY	hsa05142:Chagas disease (American trypanosomiasis)	19	21.5909	9.50048e-17	TNF, RELA, SMAD3, NFKB1, IL10, TGFB1, AKT1, FOS, MAPK1, ACE, JUN, MAPK14, CASP8, SERPINE1, MAPK3, IL1B, PIK3CA, NOS2, PIK3R3	83	104	6879	15.1415	1.9762e-14	1.9762e-14	1.33227e-13
KEGG_PATHWAY	hsa04668:TNF signaling pathway	18	20.4545	3.55304e-15	CSF2, TNF, PTGS2, RELA, EDN1, NFKB1, AKT1, VCAM1, FOS, MAPK1, CASP3, JUN, MAPK14, CASP8, MAPK3, IL1B, PIK3CA, PIK3R3	83	107	6879	13.9423	6.32383e-13	3.16192e-13	4.36318e-12
KEGG_PATHWAY	hsa04915:Estrogen signaling pathway	17	19.3182	1.8719e-14	OPRM1, ESR1, ESR2, PRKCD, SRC, AKT1, MAPK1, FOS, SP1, JUN, MAPK3, CALM3, PIK3CA, NOS3, PRKACA, PIK3R3, CALM1	83	99	6879	14.2318	3.33977e-12	1.11322e-12	2.30704e-11
KEGG_PATHWAY	hsa05200:Pathways in cancer	28	31.8182	2.14079e-14	PTGS2, PPARG, NFKB1, PTEN, TGFB1, SHH, CTNNB1, AKT1, CDC42, IGF1R, FOS, AGTR1, CASP3, CASP8, PIK3CA, PRKACA, NOS2, PIK3R3, AR, RELA, TP53, SMAD4, SMAD3, STAT3, MAPK1, HIF1A, JUN, MAPK3	83	393	6879	5.9049	3.81406e-12	9.5346e-13	2.63456e-11
KEGG_PATHWAY	hsa05161:Hepatitis B	18	20.4545	6.263e-13	TNF, RELA, TP53, SMAD4, NFKB1, PTEN, STAT3, SRC, TGFB1, AKT1, MAPK1, FOS, CASP3, JUN, CASP8, MAPK3, PIK3CA, PIK3R3	83	145	6879	10.2885	1.11477e-10	2.22955e-11	7.69973e-10
KEGG_PATHWAY	hsa05205:Proteoglycans in cancer	20	22.7273	1.07806e-12	ACTB, CAV1, TNF, TP53, ESR1, TGFB1, STAT3, SRC, CTNNB1, AKT1, CDC42, IGF1R, MAPK1, CASP3, HIF1A, MAPK14, MAPK3, PIK3CA, PRKACA, PIK3R3	83	200	6879	8.28795	1.91889e-10	3.19814e-11	1.32538e-09
KEGG_PATHWAY	hsa04917:Prolactin signaling pathway	14	15.9091	1.2254e-12	RELA, TH, ESR1, NFKB1, ESR2, STAT3, SRC, AKT1, FOS, MAPK1, MAPK14, MAPK3, PIK3CA, PIK3R3	83	71	6879	16.3424	2.18113e-10	3.1159e-11	1.50651e-09
KEGG_PATHWAY	hsa05140:Leishmaniasis	14	15.9091	1.2254e-12	IL4, TNF, PTGS2, RELA, NFKB1, IL10, TGFB1, MAPK1, FOS, MAPK14, JUN, MAPK3, IL1B, NOS2	83	71	6879	16.3424	2.18113e-10	3.1159e-11	1.50651e-09
KEGG_PATHWAY	hsa05133:Pertussis	14	15.9091	2.57121e-12	FOS, MAPK1, CASP3, TNF, JUN, MAPK14, RELA, MAPK3, CALM3, IL1B, NFKB1, NOS2, IL10, CALM1	83	75	6879	15.4708	4.57667e-10	5.72085e-11	3.16112e-09
KEGG_PATHWAY	hsa05210:Colorectal cancer	13	14.7727	4.80052e-12	TP53, SMAD4, SMAD3, TGFB1, CTNNB1, AKT1, MAPK1, FOS, CASP3, JUN, MAPK3, PIK3CA, PIK3R3	83	62	6879	17.378	8.54488e-10	9.49431e-11	5.90197e-09
KEGG_PATHWAY	hsa04722:Neurotrophin signaling pathway	16	18.1818	6.49136e-12	RELA, TP53, NFKB1, PRKCD, AKT1, CDC42, MAPK1, BDNF, MAPK14, JUN, MAPK3, CALM3, PIK3CA, NGFR, PIK3R3, CALM1	83	120	6879	11.0506	1.15546e-09	1.15546e-10	7.9808e-09
KEGG_PATHWAY	hsa04660:T cell receptor signaling pathway	15	17.0455	7.24388e-12	IL4, CSF2, TNF, RELA, NFKB1, IL10, AKT1, CDC42, MAPK1, FOS, MAPK14, JUN, MAPK3, PIK3CA, PIK3R3	83	100	6879	12.4319	1.28941e-09	1.17219e-10	8.90598e-09
KEGG_PATHWAY	hsa05212:Pancreatic cancer	13	14.7727	8.69976e-12	RELA, SMAD4, TP53, SMAD3, NFKB1, STAT3, TGFB1, AKT1, CDC42, MAPK1, MAPK3, PIK3CA, PIK3R3	83	65	6879	16.5759	1.54855e-09	1.29046e-10	1.06959e-08
KEGG_PATHWAY	hsa04024:cAMP signaling pathway	19	21.5909	9.87516e-12	PPARA, DRD2, RELA, NFKB1, AKT1, MAPK1, FOS, ADRB2, BDNF, ADRB1, GRIN2B, JUN, CHRM1, MAPK3, CALM3, PIK3CA, PRKACA, PIK3R3, CALM1	83	198	6879	7.95309	1.75779e-09	1.35214e-10	1.21411e-08
KEGG_PATHWAY	hsa04068:FoxO signaling pathway	16	18.1818	3.29379e-11	SGK1, SMAD4, SMAD3, PTEN, SIRT1, IL10, STAT3, ATM, TGFB1, AKT1, IGF1R, MAPK1, MAPK14, MAPK3, PIK3CA, PIK3R3	83	134	6879	9.89606	5.86294e-09	4.18782e-10	4.04955e-08
KEGG_PATHWAY	hsa04066:HIF-1 signaling pathway	14	15.9091	6.72438e-11	RELA, EDN1, NFKB1, STAT3, AKT1, IGF1R, MAPK1, HIF1A, SERPINE1, MAPK3, PIK3CA, NOS3, NOS2, PIK3R3	83	96	6879	12.0866	1.19694e-08	7.97959e-10	8.26728e-08
KEGG_PATHWAY	hsa05152:Tuberculosis	17	19.3182	1.78135e-10	TNF, RELA, NFKB1, IL10, SRC, TGFB1, AKT1, VDR, MAPK1, CASP3, MAPK14, CASP8, MAPK3, CALM3, IL1B, NOS2, CALM1	83	177	6879	7.96018	3.17081e-08	1.98176e-09	2.19009e-07
KEGG_PATHWAY	hsa04932:Non-alcoholic fatty liver disease (NAFLD)	15	17.0455	2.00544e-09	SREBF1, PPARA, TNF, RELA, NFKB1, ADIPOQ, TGFB1, AKT1, CDC42, CASP3, JUN, CASP8, IL1B, PIK3CA, PIK3R3	83	151	6879	8.23306	3.56968e-07	2.09981e-08	2.46559e-06
KEGG_PATHWAY	hsa04015:Rap1 signaling pathway	17	19.3182	2.26406e-09	ACTB, DRD2, SRC, CTNNB1, AKT1, CDC42, IGF1R, MAPK1, GRIN2B, MAPK14, MAPK3, P2RY1, CALM3, PIK3CA, NGFR, PIK3R3, CALM1	83	210	6879	6.70929	4.03002e-07	2.2389e-08	2.78354e-06
KEGG_PATHWAY	hsa05132:Salmonella infection	12	13.6364	2.8028e-09	ACTB, CSF2, CDC42, MAPK1, FOS, MAPK14, RELA, JUN, MAPK3, IL1B, NFKB1, NOS2	83	83	6879	11.9826	4.98898e-07	2.62578e-08	3.4459e-06
KEGG_PATHWAY	hsa04620:Toll-like receptor signaling pathway	13	14.7727	3.21914e-09	AKT1, MAPK1, FOS, TNF, MAPK14, RELA, JUN, MAPK3, CASP8, PIK3CA, IL1B, NFKB1, PIK3R3	83	106	6879	10.1645	5.73006e-07	2.86503e-08	3.95776e-06
KEGG_PATHWAY	hsa04380:Osteoclast differentiation	14	15.9091	3.47506e-09	AKT1, FOS, MAPK1, TNF, JUN, MAPK14, RELA, MAPK3, PPARG, PIK3CA, IL1B, NFKB1, PIK3R3, TGFB1	83	131	6879	8.85735	6.18561e-07	2.94553e-08	4.27241e-06
KEGG_PATHWAY	hsa05145:Toxoplasmosis	13	14.7727	4.95258e-09	AKT1, MAPK1, CASP3, TNF, MAPK14, RELA, CASP8, MAPK3, NFKB1, NOS2, IL10, TGFB1, STAT3	83	110	6879	9.79485	8.8156e-07	4.00709e-08	6.08895e-06
KEGG_PATHWAY	hsa05215:Prostate cancer	12	13.6364	5.29781e-09	AKT1, MAPK1, IGF1R, AR, RELA, MAPK3, TP53, PIK3CA, NFKB1, PIK3R3, PTEN, CTNNB1	83	88	6879	11.3018	9.4301e-07	4.10005e-08	6.51339e-06
KEGG_PATHWAY	hsa04370:VEGF signaling pathway	10	11.3636	3.25957e-08	AKT1, CDC42, MAPK1, PTGS2, MAPK14, MAPK3, PIK3CA, NOS3, PIK3R3, SRC	83	61	6879	13.5868	5.80202e-06	2.41751e-07	4.00748e-05
KEGG_PATHWAY	hsa05166:HTLV-I infection	17	19.3182	3.50032e-08	CSF2, TNF, RELA, TP53, SMAD4, SMAD3, NFKB1, ATM, TGFB1, CTNNB1, AKT1, VCAM1, FOS, JUN, PIK3CA, PRKACA, PIK3R3	83	254	6879	5.54705	6.23055e-06	2.49223e-07	4.30346e-05
KEGG_PATHWAY	hsa04210:Apoptosis	10	11.3636	3.77656e-08	AKT1, CASP3, TNF, RELA, CASP8, TP53, PIK3CA, NFKB1, PIK3R3, ATM	83	62	6879	13.3677	6.72225e-06	2.58549e-07	4.64309e-05
KEGG_PATHWAY	hsa05146:Amoebiasis	12	13.6364	3.87316e-08	CSF2, CASP3, TNF, RELA, PIK3CA, IL1B, PRKACA, NFKB1, NOS2, PIK3R3, TGFB1, IL10	83	106	6879	9.38259	6.89421e-06	2.55342e-07	4.76186e-05
KEGG_PATHWAY	hsa04931:Insulin resistance	12	13.6364	4.71532e-08	AKT1, SREBF1, PPARA, TNF, RELA, PIK3CA, NFKB1, NOS3, PIK3R3, PTEN, PRKCD, STAT3	83	108	6879	9.20884	8.39323e-06	2.99759e-07	5.79724e-05
KEGG_PATHWAY	hsa05321:Inflammatory bowel disease (IBD)	10	11.3636	5.02922e-08	IL4, TNF, RELA, JUN, SMAD3, IL1B, NFKB1, TGFB1, IL10, STAT3	83	64	6879	12.9499	8.95197e-06	3.0869e-07	6.18317e-05
KEGG_PATHWAY	hsa05214:Glioma	10	11.3636	5.78157e-08	AKT1, MAPK1, IGF1R, MAPK3, TP53, CALM3, PIK3CA, PIK3R3, PTEN, CALM1	83	65	6879	12.7507	1.02911e-05	3.4304e-07	7.10814e-05
KEGG_PATHWAY	hsa04919:Thyroid hormone signaling pathway	12	13.6364	9.09436e-08	ACTB, AKT1, MAPK1, HIF1A, MAPK3, TP53, ESR1, PIK3CA, PRKACA, PIK3R3, SRC, CTNNB1	83	115	6879	8.6483	1.61878e-05	5.22192e-07	0.00011181
KEGG_PATHWAY	hsa04071:Sphingolipid signaling pathway	12	13.6364	1.41412e-07	AKT1, MAPK1, TNF, MAPK14, RELA, MAPK3, TP53, PIK3CA, NFKB1, NOS3, PIK3R3, PTEN	83	120	6879	8.28795	2.5171e-05	7.86602e-07	0.000173858
KEGG_PATHWAY	hsa05220:Chronic myeloid leukemia	10	11.3636	1.43906e-07	AKT1, MAPK1, RELA, MAPK3, TP53, SMAD4, PIK3CA, NFKB1, PIK3R3, TGFB1	83	72	6879	11.511	2.5615e-05	7.76221e-07	0.000176925
KEGG_PATHWAY	hsa04010:MAPK signaling pathway	16	18.1818	2.20805e-07	TNF, RELA, TP53, NFKB1, TGFB1, AKT1, CDC42, MAPK1, FOS, BDNF, CASP3, MAPK14, JUN, MAPK3, IL1B, PRKACA	83	253	6879	5.24139	3.93025e-05	1.15598e-06	0.000271468
KEGG_PATHWAY	hsa05160:Hepatitis C	12	13.6364	4.05817e-07	AKT1, MAPK1, PPARA, TNF, MAPK14, RELA, MAPK3, TP53, PIK3CA, NFKB1, PIK3R3, STAT3	83	133	6879	7.47785	7.22328e-05	2.06387e-06	0.00049893
KEGG_PATHWAY	hsa05203:Viral carcinogenesis	14	15.9091	7.2875e-07	RELA, TP53, NFKB1, STAT3, SRC, CDC42, MAPK1, CASP3, JUN, MAPK3, CASP8, PIK3CA, PRKACA, PIK3R3	83	205	6879	5.66006	0.000129709	3.60326e-06	0.000895958
KEGG_PATHWAY	hsa04924:Renin secretion	9	10.2273	7.43166e-07	AGTR1, ACE, ADRB2, ADRB1, REN, AGT, CALM3, PRKACA, CALM1	83	64	6879	11.6549	0.000132275	3.57523e-06	0.000913681
KEGG_PATHWAY	hsa05164:Influenza A	13	14.7727	8.33889e-07	ACTB, AKT1, MAPK1, TNF, JUN, MAPK14, RELA, MAPK3, PIK3CA, IL1B, NFKB1, PIK3R3, PLG	83	174	6879	6.19215	0.000148421	3.90611e-06	0.00102522
KEGG_PATHWAY	hsa05211:Renal cell carcinoma	9	10.2273	9.45983e-07	AKT1, CDC42, MAPK1, HIF1A, JUN, MAPK3, PIK3CA, PIK3R3, TGFB1	83	66	6879	11.3018	0.000168371	4.31756e-06	0.00116303
KEGG_PATHWAY	hsa04912:GnRH signaling pathway	10	11.3636	1.10362e-06	CDC42, MAPK1, MAPK14, JUN, MAPK3, CALM3, PRKACA, PRKCD, SRC, CALM1	83	91	6879	9.10764	0.000196424	4.91108e-06	0.00135683
KEGG_PATHWAY	hsa04664:Fc epsilon RI signaling pathway	9	10.2273	1.19428e-06	IL4, AKT1, CSF2, MAPK1, TNF, MAPK14, MAPK3, PIK3CA, PIK3R3	83	68	6879	10.9693	0.00021256	5.18493e-06	0.0014683
KEGG_PATHWAY	hsa04662:B cell receptor signaling pathway	9	10.2273	1.33798e-06	AKT1, MAPK1, FOS, RELA, JUN, MAPK3, PIK3CA, NFKB1, PIK3R3	83	69	6879	10.8104	0.000238131	5.67046e-06	0.00164496
KEGG_PATHWAY	hsa05030:Cocaine addiction	8	9.09091	1.51404e-06	BDNF, GRIN2B, DRD2, RELA, JUN, TH, PRKACA, NFKB1	83	49	6879	13.5313	0.000269462	6.26739e-06	0.00186142
KEGG_PATHWAY	hsa04520:Adherens junction	9	10.2273	1.67e-06	ACTB, CDC42, MAPK1, IGF1R, MAPK3, SMAD4, SMAD3, SRC, CTNNB1	83	71	6879	10.5059	0.000297216	6.75588e-06	0.00205316
KEGG_PATHWAY	hsa04062:Chemokine signaling pathway	13	14.7727	1.6979e-06	RELA, NFKB1, PRKCD, STAT3, SRC, AKT1, CDC42, MAPK1, CX3CR1, MAPK3, PIK3CA, PRKACA, PIK3R3	83	186	6879	5.79265	0.000302181	6.71614e-06	0.00208747
KEGG_PATHWAY	hsa04750:Inflammatory mediator regulation of TRP channels	10	11.3636	2.07139e-06	MAPK14, CALM3, PIK3CA, IL1B, PRKACA, PIK3R3, PRKCD, SRC, HTR2A, CALM1	83	98	6879	8.45709	0.000368641	8.01537e-06	0.00254665
KEGG_PATHWAY	hsa04014:Ras signaling pathway	14	15.9091	2.19914e-06	RELA, NFKB1, AKT1, CDC42, IGF1R, MAPK1, GRIN2B, MAPK3, PIK3CA, CALM3, PRKACA, NGFR, PIK3R3, CALM1	83	226	6879	5.13413	0.00039137	8.32862e-06	0.00270369
KEGG_PATHWAY	hsa05213:Endometrial cancer	8	9.09091	2.29119e-06	AKT1, MAPK1, MAPK3, TP53, PIK3CA, PIK3R3, PTEN, CTNNB1	83	52	6879	12.7507	0.000407749	8.49647e-06	0.00281687
KEGG_PATHWAY	hsa04611:Platelet activation	11	12.5	2.77172e-06	ACTB, AKT1, MAPK1, MAPK14, MAPK3, P2RY1, PIK3CA, PRKACA, NOS3, PIK3R3, SRC	83	130	6879	7.01288	0.000493244	1.00686e-05	0.00340763
KEGG_PATHWAY	hsa05221:Acute myeloid leukemia	8	9.09091	3.82247e-06	AKT1, MAPK1, RELA, MAPK3, PIK3CA, NFKB1, PIK3R3, STAT3	83	56	6879	11.8399	0.000680169	1.36079e-05	0.00469943
KEGG_PATHWAY	hsa04621:NOD-like receptor signaling pathway	8	9.09091	3.82247e-06	MAPK1, TNF, MAPK14, RELA, MAPK3, CASP8, IL1B, NFKB1	83	56	6879	11.8399	0.000680169	1.36079e-05	0.00469943
KEGG_PATHWAY	hsa04510:Focal adhesion	13	14.7727	4.94939e-06	ACTB, CAV1, PTEN, SRC, CTNNB1, AKT1, CDC42, MAPK1, IGF1R, JUN, MAPK3, PIK3CA, PIK3R3	83	206	6879	5.23026	0.000880605	1.72742e-05	0.00608485
KEGG_PATHWAY	hsa04550:Signaling pathways regulating pluripotency of stem cells	11	12.5	5.42069e-06	AKT1, MAPK1, IGF1R, MAPK14, MAPK3, SMAD4, SMAD3, PIK3CA, PIK3R3, STAT3, CTNNB1	83	140	6879	6.51196	0.000964419	1.85553e-05	0.00666426
KEGG_PATHWAY	hsa05222:Small cell lung cancer	9	10.2273	6.60213e-06	AKT1, PTGS2, RELA, TP53, PIK3CA, NFKB1, NOS2, PIK3R3, PTEN	83	85	6879	8.77548	0.00117449	2.2173e-05	0.00811668
KEGG_PATHWAY	hsa05131:Shigellosis	8	9.09091	9.48359e-06	ACTB, CDC42, MAPK1, MAPK14, RELA, MAPK3, NFKB1, SRC	83	64	6879	10.3599	0.00168666	3.12604e-05	0.011659
KEGG_PATHWAY	hsa05230:Central carbon metabolism in cancer	8	9.09091	9.48359e-06	AKT1, MAPK1, HIF1A, MAPK3, TP53, PIK3CA, PIK3R3, PTEN	83	64	6879	10.3599	0.00168666	3.12604e-05	0.011659
KEGG_PATHWAY	hsa04921:Oxytocin signaling pathway	11	12.5	1.00368e-05	ACTB, MAPK1, FOS, PTGS2, JUN, MAPK3, CALM3, PRKACA, NOS3, SRC, CALM1	83	150	6879	6.07783	0.00178496	3.24823e-05	0.012339
KEGG_PATHWAY	hsa05031:Amphetamine addiction	8	9.09091	1.16636e-05	FOS, GRIN2B, JUN, TH, CALM3, PRKACA, SIRT1, CALM1	83	66	6879	10.046	0.00207397	3.7073e-05	0.0143388
KEGG_PATHWAY	hsa05218:Melanoma	8	9.09091	1.8986e-05	AKT1, MAPK1, IGF1R, MAPK3, TP53, PIK3CA, PIK3R3, PTEN	83	71	6879	9.33854	0.00337384	5.92886e-05	0.0233399
KEGG_PATHWAY	hsa04930:Type II diabetes mellitus	7	7.95455	1.96276e-05	MAPK1, TNF, MAPK3, PIK3CA, PIK3R3, PRKCD, ADIPOQ	83	48	6879	12.0866	0.00348765	6.02352e-05	0.0241285
KEGG_PATHWAY	hsa05231:Choline metabolism in cancer	9	10.2273	2.37704e-05	AKT1, MAPK1, FOS, HIF1A, SP1, JUN, MAPK3, PIK3CA, PIK3R3	83	101	6879	7.3853	0.00422223	7.17122e-05	0.0292205
KEGG_PATHWAY	hsa04261:Adrenergic signaling in cardiomyocytes	10	11.3636	3.4311e-05	AKT1, MAPK1, AGTR1, ADRB2, ADRB1, MAPK14, MAPK3, CALM3, PRKACA, CALM1	83	138	6879	6.00576	0.00608886	0.000101786	0.0421755
KEGG_PATHWAY	hsa04020:Calcium signaling pathway	11	12.5	4.67532e-05	AGTR1, ADRB2, ADRB1, NOS1, CHRM1, CALM3, PRKACA, NOS3, NOS2, HTR2A, CALM1	83	179	6879	5.09315	0.00828773	0.000136421	0.0574655
KEGG_PATHWAY	hsa04151:PI3K-Akt signaling pathway	15	17.0455	4.79734e-05	IL4, SGK1, RELA, TP53, NFKB1, PTEN, AKT1, IGF1R, MAPK1, CHRM1, MAPK3, PIK3CA, NOS3, NGFR, PIK3R3	83	345	6879	3.60346	0.00850311	0.000137724	0.0589649
KEGG_PATHWAY	hsa04923:Regulation of lipolysis in adipocytes	7	7.95455	4.81358e-05	AKT1, ADRB2, ADRB1, PTGS2, PIK3CA, PRKACA, PIK3R3	83	56	6879	10.3599	0.00853178	0.000135997	0.0591645
KEGG_PATHWAY	hsa04150:mTOR signaling pathway	7	7.95455	5.88791e-05	AKT1, MAPK1, TNF, MAPK3, PIK3CA, PIK3R3, PTEN	83	58	6879	10.0027	0.0104261	0.000163749	0.0723648
KEGG_PATHWAY	hsa04914:Progesterone-mediated oocyte maturation	8	9.09091	7.15777e-05	AKT1, MAPK1, IGF1R, MAPK14, MAPK3, PIK3CA, PRKACA, PIK3R3	83	87	6879	7.62111	0.0126605	0.000196	0.0879656
KEGG_PATHWAY	hsa04960:Aldosterone-regulated sodium reabsorption	6	6.81818	8.91702e-05	MAPK1, SGK1, MAPK3, NR3C2, PIK3CA, PIK3R3	83	39	6879	12.7507	0.0157477	0.000240471	0.109575
KEGG_PATHWAY	hsa05169:Epstein-Barr virus infection	9	10.2273	9.25454e-05	AKT1, MAPK14, RELA, JUN, TP53, PIK3CA, NFKB1, PIK3R3, STAT3	83	122	6879	6.11406	0.0163389	0.000245848	0.113721
KEGG_PATHWAY	hsa04080:Neuroactive ligand-receptor interaction	13	14.7727	9.52085e-05	OPRM1, AGTR1, ADRB2, ADRB1, GRIN2B, DRD2, CHRM1, P2RY1, F2, ADRA2A, NR3C1, PLG, HTR2A	83	277	6879	3.88965	0.0168051	0.000249203	0.116991
KEGG_PATHWAY	hsa04022:cGMP-PKG signaling pathway	10	11.3636	9.90019e-05	AKT1, MAPK1, AGTR1, ADRB2, ADRB1, MAPK3, ADRA2A, CALM3, NOS3, CALM1	83	158	6879	5.24554	0.0174688	0.000255376	0.12165
KEGG_PATHWAY	hsa04713:Circadian entrainment	8	9.09091	0.000125386	MAPK1, FOS, NOS1, GRIN2B, MAPK3, CALM3, PRKACA, CALM1	83	95	6879	6.97933	0.0220729	0.000318808	0.154047
KEGG_PATHWAY	hsa04728:Dopaminergic synapse	9	10.2273	0.00012971	AKT1, FOS, GRIN2B, DRD2, MAPK14, TH, CALM3, PRKACA, CALM1	83	128	6879	5.82747	0.0228253	0.000325157	0.159355
KEGG_PATHWAY	hsa05120:Epithelial cell signaling in Helicobacter pylori infection	7	7.95455	0.000133302	CDC42, CASP3, MAPK14, RELA, JUN, NFKB1, SRC	83	67	6879	8.65905	0.0234501	0.000329521	0.163765
KEGG_PATHWAY	hsa05202:Transcriptional misregulation in cancer	10	11.3636	0.000151368	CSF2, IGF1R, SP1, RELA, PPARG, TP53, MPO, NFKB1, NGFR, ATM	83	167	6879	4.96285	0.0265857	0.000369048	0.18594
KEGG_PATHWAY	hsa05010:Alzheimer's disease	10	11.3636	0.000158401	MAPK1, CASP3, TNF, NOS1, GRIN2B, MAPK3, CASP8, CALM3, IL1B, CALM1	83	168	6879	4.9333	0.0278038	0.000380977	0.194572
KEGG_PATHWAY	hsa05162:Measles	9	10.2273	0.000169414	IL4, AKT1, RELA, TP53, PIK3CA, IL1B, NFKB1, PIK3R3, STAT3	83	133	6879	5.60839	0.029708	0.000402028	0.208086
KEGG_PATHWAY	hsa04920:Adipocytokine signaling pathway	7	7.95455	0.000170232	AKT1, PPARA, TNF, RELA, NFKB1, ADIPOQ, STAT3	83	70	6879	8.28795	0.0298493	0.000398656	0.209091
KEGG_PATHWAY	hsa04910:Insulin signaling pathway	9	10.2273	0.000218644	AKT1, SREBF1, MAPK1, MAPK3, CALM3, PIK3CA, PRKACA, PIK3R3, CALM1	83	138	6879	5.40519	0.0381751	0.000505365	0.26848
KEGG_PATHWAY	hsa05014:Amyotrophic lateral sclerosis (ALS)	6	6.81818	0.000296166	CASP3, TNF, NOS1, GRIN2B, MAPK14, TP53	83	50	6879	9.94554	0.0513595	0.000675738	0.363513
KEGG_PATHWAY	hsa05100:Bacterial invasion of epithelial cells	7	7.95455	0.000309157	ACTB, CDC42, CAV1, PIK3CA, PIK3R3, SRC, CTNNB1	83	78	6879	7.43791	0.0535512	0.000696446	0.379429
KEGG_PATHWAY	hsa04725:Cholinergic synapse	8	9.09091	0.000330736	AKT1, MAPK1, FOS, CHRM1, MAPK3, PIK3CA, PRKACA, PIK3R3	83	111	6879	5.9733	0.0571808	0.000735739	0.405865
KEGG_PATHWAY	hsa05216:Thyroid cancer	5	5.68182	0.000355059	MAPK1, MAPK3, PPARG, TP53, CTNNB1	83	29	6879	14.2896	0.0612552	0.000780086	0.435653
KEGG_PATHWAY	hsa05134:Legionellosis	6	6.81818	0.000425907	CASP3, TNF, RELA, CASP8, IL1B, NFKB1	83	54	6879	9.20884	0.0730241	0.0009243	0.522374
KEGG_PATHWAY	hsa04666:Fc gamma R-mediated phagocytosis	7	7.95455	0.000462263	AKT1, CDC42, MAPK1, MAPK3, PIK3CA, PIK3R3, PRKCD	83	84	6879	6.90663	0.079006	0.000991096	0.566847
KEGG_PATHWAY	hsa04350:TGF-beta signaling pathway	7	7.95455	0.000462263	MAPK1, TNF, SP1, MAPK3, SMAD4, SMAD3, TGFB1	83	84	6879	6.90663	0.079006	0.000991096	0.566847
KEGG_PATHWAY	hsa05223:Non-small cell lung cancer	6	6.81818	0.000504946	AKT1, MAPK1, MAPK3, TP53, PIK3CA, PIK3R3	83	56	6879	8.87995	0.0859802	0.0010697	0.619038
KEGG_PATHWAY	hsa04064:NF-kappa B signaling pathway	7	7.95455	0.00055822	VCAM1, TNF, PTGS2, RELA, IL1B, NFKB1, ATM	83	87	6879	6.66847	0.0946113	0.00116862	0.684144
KEGG_PATHWAY	hsa04012:ErbB signaling pathway	7	7.95455	0.00055822	AKT1, MAPK1, JUN, MAPK3, PIK3CA, PIK3R3, SRC	83	87	6879	6.66847	0.0946113	0.00116862	0.684144
KEGG_PATHWAY	hsa04540:Gap junction	7	7.95455	0.000593429	MAPK1, ADRB1, DRD2, MAPK3, PRKACA, SRC, HTR2A	83	88	6879	6.59269	0.100271	0.00122787	0.727151
KEGG_PATHWAY	hsa04152:AMPK signaling pathway	8	9.09091	0.000616757	AKT1, SREBF1, IGF1R, PPARG, PIK3CA, PIK3R3, ADIPOQ, SIRT1	83	123	6879	5.39054	0.104002	0.00126146	0.755636
KEGG_PATHWAY	hsa04720:Long-term potentiation	6	6.81818	0.00107654	MAPK1, GRIN2B, MAPK3, CALM3, PRKACA, CALM1	83	66	6879	7.5345	0.174468	0.00217635	1.31554
KEGG_PATHWAY	hsa04115:p53 signaling pathway	6	6.81818	0.00115261	CASP3, CASP8, SERPINE1, TP53, PTEN, ATM	83	67	6879	7.42205	0.185583	0.00230389	1.40789
KEGG_PATHWAY	hsa05034:Alcoholism	9	10.2273	0.00115312	MAPK1, BDNF, GRIN2B, DRD2, MAPK3, TH, CRH, CALM3, CALM1	83	177	6879	4.21421	0.185658	0.00227933	1.40851
KEGG_PATHWAY	hsa04916:Melanogenesis	7	7.95455	0.00116546	MAPK1, MAPK3, EDN1, CALM3, PRKACA, CTNNB1, CALM1	83	100	6879	5.80157	0.187446	0.00227842	1.42348
KEGG_PATHWAY	hsa05168:Herpes simplex infection	9	10.2273	0.00142892	FOS, CASP3, TNF, RELA, JUN, CASP8, TP53, IL1B, NFKB1	83	183	6879	4.07604	0.224719	0.0027628	1.74268
KEGG_PATHWAY	hsa04114:Oocyte meiosis	7	7.95455	0.00199556	MAPK1, IGF1R, AR, MAPK3, CALM3, PRKACA, CALM1	83	111	6879	5.22664	0.299223	0.00381598	2.42599
KEGG_PATHWAY	hsa04670:Leukocyte transendothelial migration	7	7.95455	0.00238812	ACTB, VCAM1, CDC42, MAPK14, PIK3CA, PIK3R3, CTNNB1	83	115	6879	5.04484	0.346618	0.00451735	2.8968
KEGG_PATHWAY	hsa04614:Renin-angiotensin system	4	4.54545	0.00243439	AGTR1, ACE, REN, AGT	83	23	6879	14.4138	0.35199	0.00455642	2.95215
KEGG_PATHWAY	hsa04270:Vascular smooth muscle contraction	7	7.95455	0.00260497	MAPK1, AGTR1, MAPK3, CALM3, PRKACA, PRKCD, CALM1	83	117	6879	4.9586	0.371418	0.00482467	3.15598
KEGG_PATHWAY	hsa05144:Malaria	5	5.68182	0.00264402	VCAM1, TNF, IL1B, TGFB1, IL10	83	49	6879	8.45709	0.375784	0.00484656	3.20259
KEGG_PATHWAY	hsa04650:Natural killer cell mediated cytotoxicity	7	7.95455	0.00321186	CSF2, MAPK1, CASP3, TNF, MAPK3, PIK3CA, PIK3R3	83	122	6879	4.75538	0.43596	0.00582613	3.87798
KEGG_PATHWAY	hsa04810:Regulation of actin cytoskeleton	9	10.2273	0.00338431	ACTB, CDC42, MAPK1, CHRM1, MAPK3, F2, PIK3CA, PIK3R3, SRC	83	210	6879	3.55198	0.453067	0.0060767	4.08223
KEGG_PATHWAY	hsa04970:Salivary secretion	6	6.81818	0.00348548	ADRB2, ADRB1, NOS1, CALM3, PRKACA, CALM1	83	86	6879	5.78229	0.462862	0.00619572	4.20188
KEGG_PATHWAY	hsa05323:Rheumatoid arthritis	6	6.81818	0.00384895	CSF2, FOS, TNF, JUN, IL1B, TGFB1	83	88	6879	5.65088	0.496632	0.00677334	4.63058
KEGG_PATHWAY	hsa04730:Long-term depression	5	5.68182	0.00551244	MAPK1, IGF1R, NOS1, MAPK3, CRH	83	60	6879	6.90663	0.62616	0.00959998	6.57023
KEGG_PATHWAY	hsa04922:Glucagon signaling pathway	6	6.81818	0.00634835	AKT1, PPARA, CALM3, PRKACA, SIRT1, CALM1	83	99	6879	5.023	0.67813	0.0109456	7.53117
KEGG_PATHWAY	hsa05143:African trypanosomiasis	4	4.54545	0.00688501	VCAM1, TNF, IL1B, IL10	83	33	6879	10.046	0.70764	0.0117551	8.1433
KEGG_PATHWAY	hsa04630:Jak-STAT signaling pathway	7	7.95455	0.0074414	IL4, AKT1, CSF2, PIK3CA, PIK3R3, IL10, STAT3	83	145	6879	4.00108	0.735396	0.0125823	8.77401
KEGG_PATHWAY	hsa05020:Prion diseases	4	4.54545	0.00748718	MAPK1, MAPK3, IL1B, PRKACA	83	34	6879	9.75053	0.73756	0.0125408	8.82573
KEGG_PATHWAY	hsa04622:RIG-I-like receptor signaling pathway	5	5.68182	0.00947696	TNF, MAPK14, RELA, CASP8, NFKB1	83	70	6879	5.91997	0.81639	0.0157158	11.0477
KEGG_PATHWAY	hsa04726:Serotonergic synapse	6	6.81818	0.0101855	MAPK1, CASP3, PTGS2, MAPK3, PRKACA, HTR2A	83	111	6879	4.47997	0.838349	0.0167317	11.8268
KEGG_PATHWAY	hsa05219:Bladder cancer	4	4.54545	0.0125664	MAPK1, MAPK3, TP53, SRC	83	41	6879	8.08581	0.894706	0.0204396	14.3993
KEGG_PATHWAY	hsa05414:Dilated cardiomyopathy	5	5.68182	0.0176017	ACTB, TNF, ADRB1, PRKACA, TGFB1	83	84	6879	4.9333	0.957617	0.0283274	19.614
KEGG_PATHWAY	hsa04640:Hematopoietic cell lineage	5	5.68182	0.0197708	IL4, CSF2, TNF, CD34, IL1B	83	87	6879	4.76319	0.971403	0.0315149	21.7692
KEGG_PATHWAY	hsa05206:MicroRNAs in cancer	9	10.2273	0.0200812	CASP3, PTGS2, TP53, NFKB1, ABCB1, PTEN, SIRT1, ATM, STAT3	83	286	6879	2.6081	0.97297	0.0317253	22.0732
KEGG_PATHWAY	hsa00220:Arginine biosynthesis	3	3.40909	0.0232092	NOS1, NOS3, NOS2	83	20	6879	12.4319	0.9847	0.0363147	25.0769
KEGG_PATHWAY	hsa04060:Cytokine-cytokine receptor interaction	8	9.09091	0.0252771	IL4, CSF2, TNF, CX3CR1, IL1B, NGFR, TGFB1, IL10	83	243	6879	2.72854	0.989508	0.0391866	27.0039
KEGG_PATHWAY	hsa05016:Huntington's disease	7	7.95455	0.0265296	CASP3, BDNF, SP1, GRIN2B, CASP8, PPARG, TP53	83	192	6879	3.02165	0.991655	0.0407637	28.1488
KEGG_PATHWAY	hsa04070:Phosphatidylinositol signaling system	5	5.68182	0.0291015	CALM3, PIK3CA, PIK3R3, PTEN, CALM1	83	98	6879	4.22855	0.994789	0.0443069	30.4482
KEGG_PATHWAY	hsa05416:Viral myocarditis	4	4.54545	0.030127	ACTB, CAV1, CASP3, CASP8	83	57	6879	5.81611	0.995682	0.0454725	31.346
KEGG_PATHWAY	hsa04723:Retrograde endocannabinoid signaling	5	5.68182	0.0320314	MAPK1, PTGS2, MAPK14, MAPK3, PRKACA	83	101	6879	4.10295	0.996957	0.0479229	32.9851
KEGG_PATHWAY	hsa04390:Hippo signaling pathway	6	6.81818	0.0337162	ACTB, SERPINE1, SMAD4, SMAD3, TGFB1, CTNNB1	83	151	6879	3.29323	0.997768	0.0500087	34.4051
KEGG_PATHWAY	hsa05310:Asthma	3	3.40909	0.0492337	IL4, TNF, IL10	83	30	6879	8.28795	0.999875	0.0721536	46.2439
KEGG_PATHWAY	hsa04110:Cell cycle	5	5.68182	0.0601041	TP53, SMAD4, SMAD3, TGFB1, ATM	83	124	6879	3.34192	0.999984	0.0871523	53.3309
KEGG_PATHWAY	hsa05410:Hypertrophic cardiomyopathy (HCM)	4	4.54545	0.0657029	ACTB, ACE, TNF, TGFB1	83	78	6879	4.25023	0.999994	0.0943985	56.6361
KEGG_PATHWAY	hsa05330:Allograft rejection	3	3.40909	0.0714892	IL4, TNF, IL10	83	37	6879	6.71996	0.999998	0.10178	59.8249
KEGG_PATHWAY	hsa04925:Aldosterone synthesis and secretion	4	4.54545	0.0718717	AGTR1, CALM3, PRKACA, CALM1	83	81	6879	4.09282	0.999998	0.101534	60.0279
KEGG_PATHWAY	hsa04310:Wnt signaling pathway	5	5.68182	0.0819892	JUN, TP53, SMAD4, PRKACA, CTNNB1	83	138	6879	3.00288	1	0.11469	65.0673
KEGG_PATHWAY	hsa04973:Carbohydrate digestion and absorption	3	3.40909	0.0890083	AKT1, PIK3CA, PIK3R3	83	42	6879	5.91997	1	0.123391	68.213
