# Supplementary material for: A Network Pharmacology Approach to Investigate the Active Compounds and Mechanisms of Musk for Ischemic Stroke
Source: Evid Based Complement Alternat Med. 2020 Jul 3;2020:4063180. doi: 10.1155/2020/4063180 (PMC7354650; doi:10.1155/2020/4063180)
Supplement: Supplementary Materials — The detailed information of chemical composition and predicted target of musk (S1), ischemic stroke target (S2), string data (S3), compound target analysis data (S4), Gene Ontology enrichment analysis results (S5, S6, and S7), and KEGG enrichment analysis results (S8 and S9) used to support the findings of this study is included within the supplementary information files. [file 4063180.f1.zip › 4063180.f1/S9.MCDOE-KEGG.xls]

## Sheet: Sheet1
GOID	GOTerm	Term PValue	Nr. Genes
KEGG:04933	AGE-RAGE signaling pathway in diabetic complications	6.89626e-09	7
KEGG:04659	Th17 cell differentiation	3.96598e-07	6
KEGG:04919	Thyroid hormone signaling pathway	1.56143e-05	5
KEGG:04137	Mitophagy	3.08775e-05	4
KEGG:04917	Prolactin signaling pathway	4.14263e-05	4
KEGG:05210	Colorectal cancer	4.63079e-05	4
KEGG:05212	Pancreatic cancer	5.4403e-05	4
KEGG:05132	Salmonella infection	9.31088e-05	4
KEGG:04915	Estrogen signaling pathway	0.000154857	4
KEGG:05231	Choline metabolism in cancer	0.000161075	4
KEGG:04066	HIF-1 signaling pathway	0.000167472	4
KEGG:05131	Shigellosis	0.000804918	3
KEGG:05230	Central carbon metabolism in cancer	0.000804918	3
KEGG:05321	Inflammatory bowel disease (IBD)	0.000804918	3
KEGG:05223	Non-small cell lung cancer	0.000841685	3
KEGG:05211	Renal cell carcinoma	0.000958361	3
KEGG:04520	Adherens junction	0.00108485	3
KEGG:05140	Leishmaniasis	0.00117478	3
GOID	GOTerm	Term PValue	Nr. Genes
KEGG:05161	Hepatitis B	2.29512e-08	6
KEGG:04917	Prolactin signaling pathway	3.13759e-08	5
KEGG:04659	Th17 cell differentiation	2.68618e-07	5
KEGG:05131	Shigellosis	1.82076e-06	4
KEGG:04662	B cell receptor signaling pathway	2.60091e-06	4
KEGG:05140	Leishmaniasis	3.07289e-06	4
KEGG:05212	Pancreatic cancer	3.2435e-06	4
KEGG:05133	Pertussis	3.42105e-06	4
KEGG:05220	Chronic myeloid leukemia	3.79767e-06	4
KEGG:05132	Salmonella infection	5.61876e-06	4
KEGG:04211	Longevity regulating pathway	6.44534e-06	4
KEGG:04658	Th1 and Th2 cell differentiation	7.35881e-06	4
KEGG:04657	IL-17 signaling pathway	7.68358e-06	4
KEGG:04933	AGE-RAGE signaling pathway in diabetic complications	9.86035e-06	4
KEGG:05221	Acute myeloid leukemia	0.000111416	3
KEGG:05120	Epithelial cell signaling in Helicobacter pylori infection	0.00012182	3
KEGG:04520	Adherens junction	0.000144492	3
KEGG:05210	Colorectal cancer	0.000144492	3
